# Supplementary material for: Multiple imputation methods: a case study of daily gold price
Source: PeerJ Comput Sci. 2024 Sep 25;10:e2337. doi: 10.7717/peerj-cs.2337 (PMC11639230; doi:10.7717/peerj-cs.2337)
Supplement: Supplemental Information 4 [file peerj-cs-10-2337-s004.xlsx]

## Sheet: Sheet1
Date	Open	High	Low	Close*	Num
2024-02-07	2032.8	2039.5	2032.7	2035.2	1
2024-02-06	2025.9	2037.3	2025.9	2034.5	2
2024-02-05	2038.9	2040.8	2013.8	2025.7	3
2024-02-02	2054.8	2055.9	2027.7		4
2024-02-01	2040.2	2064.5	2029	2053	5
2024-01-31	2035.4	2055	2030	2048.4	6
2024-01-30	2032.5	2048.5	2028.1	2031.5	7
2024-01-29	2025.2	2025.2	2025.2	2025.2	8
2024-01-26	2021.7	2022.4	2016.8	2016.8	9
2024-01-25	2012.1	2022.4	2012.1	2016.9	10
2024-01-24	2023.2	2033.2	2013.9		11
2024-01-23	2030.3	2030.3	2022.5		12
2024-01-22	2021.3	2021.3	2019.8	2019.8	13
2024-01-19	2023.2	2036	2019.5	2026.5	14
2024-01-18	2012.8	2018.6	2009.5	2018.6	15
2024-01-17	2026.5	2026.5	2002.6	2002.6	16
2024-01-16	2051.7	2054.8	2026		17
2024-01-15	2051.7	2054.8	2051.7		18
2024-01-12	2031.1	2057	2031.1	2046.7	19
2024-01-11	2025.1	2025.1	2014.3	2014.3	20
2024-01-10	2029	2035.6	2021.7	2021.7	21
2024-01-09	2035.8	2035.8	2026.4	2026.4	22
2024-01-08	2019.1	2033.7	2019.1	2026.6	23
2024-01-05	2044.5	2048.1	2042.4	2042.4	24
2024-01-04	2041.6	2044.5	2038	2042.3	25
2024-01-03	2034.2	2044	2034.2	2034.2	26
2024-01-02	2063.5	2073.7	2057.1	2064.4	27
2023-12-29	2068	2068.9	2062.1	2062.4	28
2023-12-28	2081.6	2087.3	2066.5	2073.9	29
2023-12-27	2067.3	2081.9	2064.8	2081.9	30
2023-12-26	2060	2060.8	2054.2	2058.2	31
2023-12-22	2055.7	2068.7	2052.2	2057.1	32
2023-12-21	2035.8	2044.5	2033	2039.1	33
2023-12-20	2037.1	2037.1	2030.3	2034.5	34
2023-12-19	2025.2	2042.7	2025.2	2038.4	35
2023-12-18	2024.3	2032.8	2024	2026.3	36
2023-12-15	2032.6	2043.4	2018.3		37
2023-12-14	2024.7	2040.1	2024.3	2030.2	38
2023-12-13	1978.5	2024.8	1975	1982.3	39
2023-12-12	1984.2	1994.2	1977.8	1977.8	40
2023-12-11	2004.1	2004.2	1977.2		41
2023-12-08	2031.7	2033.1	1995	1998.3	42
2023-12-07	2029.2	2034.9	2024	2029.9	43
2023-12-06	2019.9	2035.8	2019	2030.5	44
2023-12-05	2035.1	2037	2010.2	2018.5	45
2023-12-04	2075.3	2130.2	2021	2024.1	46
2023-12-01	2038.3	2073.2	2036	2071	47
2023-11-30	2046.1	2047.1	2033.1	2038.1	48
2023-11-29	2041.7	2052.1	2036	2047.1	49
2023-11-28	2040.6	2042.7	2039.7	2039.7	50
2023-11-27	2011.7	2011.8	2011.7	2011.8	51
2023-11-24	1991.9	2002.2	1991.5	2002.2	52
2023-11-23	1991.9	1991.9	1991.5	1991.5	53
2023-11-22	1999.1	1999.4	1991	1991.4	54
2023-11-21	1990.7	2005.5	1988.5	1999.3	55
2023-11-20	1978.7	1979.4	1969.7	1977.7	56
2023-11-17	1982.5	1984	1979.8	1981.6	57
2023-11-16	1965.3	1983.9	1964.6	1983.9	58
2023-11-15	1962.8	1962.8	1960		59
2023-11-14	1965.8	1965.8	1961.8	1961.8	60
2023-11-13	1939.9	1947.2	1934	1945.5	61
2023-11-10	1959.6	1959.6	1932.6	1932.6	62
2023-11-09	1951.7	1964.2	1945.3	1964.2	63
2023-11-08	1967.8	1967.8	1947.7	1951.5	64
2023-11-07	1966.5	1966.8	1960.7	1966.8	65
2023-11-06	1981.6	1981.6	1977.4	1981.6	66
2023-11-02	1989	1991.5	1989	1991.5	67
2023-11-01	1989.1	1990.3	1979.5	1985.6	68
2023-10-31	1990.5	1990.5	1977.8	1978.8	69
2023-10-30	1996.5	2001	1983.7		70
2023-10-29	2004.1	2004.1	1992.5	1996.2	71
2023-10-26	1988.6	1988.6	1988.6	1988.6	72
2023-10-25	1988.2	1988.2	1980.4	1987.2	73
2023-10-24	1971.2	1985.3	1971.2	1984.1	74
2023-10-23	1970.3	1975	1970.3	1975	75
2023-10-22	1976.2	1978.9	1972.9	1976.3	76
2023-10-19	1981.1	1988.6	1980.4	1982.5	77
2023-10-18	1950.1	1977.7	1945.7	1968.4	78
2023-10-17	1935	1957.9	1935	1955.3	79
2023-10-16	1914.3	1925.8	1914.3	1922.7	80
2023-10-15	1910.4	1921.1	1910.3	1921.1	81
2023-10-12	1877.5	1930.1	1877.5	1927.4	82
2023-10-11	1874.7	1881.2	1867		83
2023-10-10	1869.5	1874.6	1869.1	1872.8	84
2023-10-09	1857	1861.4	1852.8	1861	85
2023-10-08	1842.5	1861.5	1842.5	1849.5	86
2023-10-05	1819	1831.8	1809.4	1830.2	87
2023-10-04	1826.3	1826.3	1815.6	1816.6	88
2023-10-03	1821.8	1828.2	1816.4	1818.5	89
2023-10-02	1825	1830.9	1816.8	1824.6	90
2023-10-01	1844.1	1845.9	1826.7	1830	91
2023-09-28	1864.3	1872.3	1846		92
2023-09-27	1875.5	1878.2	1856.7	1860.4	93
2023-09-26	1871.6	1871.6	1871.6		94
2023-09-25	1905	1905.1	1900.4	1900.4	95
2023-09-24	1916.6	1916.6	1916.6		96
2023-09-21	1925.4	1925.4	1925.4	1925.4	97
2023-09-20	1924	1924	1919.2	1919.2	98
2023-09-19	1945.6	1945.6	1929.2	1945.6	99
2023-09-18	1934	1934	1932	1932	100
2023-09-17	1928.2	1931.5	1926.4		101
2023-09-14	1923.5	1927.3	1923.5	1923.7	102
2023-09-13	1903	1910	1903	1910	103
2023-09-12	1910.3	1914.6	1908.9	1909.1	104
2023-09-11	1920.8	1920.8	1911.3	1911.3	105
2023-09-10	1923	1928.3	1921.8	1923.3	106
2023-09-07	1924	1924.7	1918.4	1918.4	107
2023-09-06	1917.6	1921.5	1917.5	1917.5	108
2023-09-05	1924.1	1925.3	1916.3	1918.1	109
2023-09-04	1934.4	1934.4	1924.7	1926.2	110
2023-08-31	1950	1950	1936.6	1939.8	111
2023-08-30	1944.4	1944.4	1938.2	1938.2	112
2023-08-29	1936	1946.4	1934.6	1944.3	113
2023-08-28	1917.9	1936.5	1916.9	1936.5	114
2023-08-27	1915.5	1921.5	1915.5	1917.9	115
2023-08-24	1919.8	1919.8	1911.1	1911.1	116
2023-08-23	1920	1920.8	1918.2	1918.2	117
2023-08-22	1909.6	1918.5	1909.6	1918.5	118
2023-08-21	1894.6	1896.8	1892.8	1896.4	119
2023-08-20	1893.6	1893.6	1893.3	1893.3	120
2023-08-17	1891.8	1891.8	1886.1	1886.1	121
2023-08-16	1893.7	1902.4	1884	1884.1	122
2023-08-15	1904.5	1904.5	1890.3	1896.1	123
2023-08-14	1906	1907.7	1895	1902.5	124
2023-08-13	1909.3	1912.6	1903.3	1910.6	125
2023-08-10	1913	1916.6	1911.8	1912.9	126
2023-08-09	1921.1	1927.8	1911.4	1914.4	127
2023-08-08	1925.4	1928.8	1913.7	1915.4	128
2023-08-07	1931.7	1933.2	1923	1924.1	129
2023-08-06	1941	1941	1929.8	1933.5	130
2023-08-03	1934.9	1945	1920	1939.6	131
2023-08-02	1934.2	1936.5	1928	1932	132
2023-08-01	1948.4	1953.6	1933.2	1937.4	133
2023-07-31	1964.9	1965.4	1940.7	1940.7	134
2023-07-30	1959.2	1971.6	1950	1970.5	135
2023-07-27	1945.5	1962.2	1944.2	1960.4	136
2023-07-26	1945.4	1945.4	1945.4	1945.4	137
2023-07-25	1966.2	1972	1966.2	1968.9	138
2023-07-24	1953	1962.5	1953		139
2023-07-23	1965.3	1965.5	1960.3	1960.3	140
2023-07-20	1961.8	1964.3	1961.8	1964.3	141
2023-07-19	1973.7	1973.7	1965.6	1968.3	142
2023-07-18	1977	1977.5	1973	1977.5	143
2023-07-17	1968.8	1978.4	1963.4	1977.2	144
2023-07-16	1954	1956.5	1946.6	1952.4	145
2023-07-13	1958.4	1960.6	1952.7	1960.1	146
2023-07-12	1961.1	1961.1	1953	1959.2	147
2023-07-11	1932.3	1958	1932.2		148
2023-07-10	1925	1937	1924.2	1931.3	149
2023-07-09	1923.6	1926.1	1912.3	1925	150
2023-07-06	1913.4	1934.1	1913.4	1926.2	151
2023-07-05	1909.3	1910.2	1903.2	1908.7	152
2023-07-04	1923.5	1933.9	1914.7	1919.6	153
2023-07-03	1917.9	1929.5	1917.9	1921.7	154
2023-06-29	1908.6	1921.1	1900.6	1921.1	155
2023-06-28	1909.9	1909.9	1892.5	1909.2	156
2023-06-27	1912.3	1912.3	1912.3	1912.3	157
2023-06-26	1927	1929.4	1914	1914	158
2023-06-25	1922.9	1928.5	1922.5	1923.7	159
2023-06-22	1918.7	1932.5	1918.7	1919.1	160
2023-06-21	1920	1921	1912.1	1912.7	161
2023-06-20	1935.6	1936.8	1920	1933.3	162
2023-06-19	1958.6	1958.6	1931.3	1935.5	163
2023-06-15	1961.4	1962.9	1953.5	1958.4	164
2023-06-14	1941.7	1958.8	1926	1957.8	165
2023-06-13	1946.2	1958.2	1940.3	1955.3	166
2023-06-12	1960.6	1967.5	1940.3	1944.6	167
2023-06-11	1959.7	1963.5	1951.4	1955.3	168
2023-06-08	1965.1	1969.8	1960.3	1962.2	169
2023-06-07	1943.2	1969	1943.1	1963.6	170
2023-06-06	1959	1968.4	1940.7	1942.7	171
2023-06-05	1960.8	1965.5	1958.8		172
2023-06-04	1947.5	1961.9	1937.8	1958	173
2023-06-01	1977.1	1982.5	1947.4	1952.4	174
2023-05-31	1963.2	1983	1954.3	1978	175
2023-05-30	1958.2	1973	1953	1963.9	176
2023-05-29	1942.7	1962.6	1931	1958	177
2023-05-25	1948.2	1948.4	1944.1	1944.1	178
2023-05-24	1943.1	1943.1	1943.1	1943.1	179
2023-05-23	1975.4	1975.4	1962.8	1962.8	180
2023-05-22	1972.4	1972.4	1972.4	1972.4	181
2023-05-21	1980.5	1980.5	1974.8	1974.8	182
2023-05-18	1960	1978.7	1960	1978.7	183
2023-05-17	1956.5	1956.8	1956.5	1956.5	184
2023-05-16	1983.6	1983.6	1980.7	1980.7	185
2023-05-15	1988.4	1988.4	1988.4	1988.4	186
2023-05-14	2013.8	2018	2013.8	2018	187
2023-05-11	2014.5	2014.5	2014.5	2014.5	188
2023-05-10	2034.1	2038.3	2014	2014.7	189
2023-05-09	2032.3	2044.3	2029.5	2030.5	190
2023-05-08	2026.6	2037.3	2025.9		191
2023-05-07	2022.5	2026.3	2022.5	2026.3	192
2023-05-04	2046.4	2046.4	2004.3		193
2023-05-03	2045	2072	2040	2048	194
2023-05-02	2017.1	2035.1	2015.2	2028.6	195
2023-05-01	1994.7	2018	1994.7	2014.3	196
2023-04-30	1980.1	2005	1976.9	1983.4	197
2023-04-27	1986.9	1990.1	1977.7	1990.1	198
2023-04-26	1990.6	2002.3	1979.9	1989.9	199
2023-04-25	1997.8	1998.8	1985.6	1985.7	200
2023-04-24	1995.7	1999.1	1982.3	1994	201
2023-04-23	1981.3	1989.8	1977.4	1989.1	202
2023-04-20	1996.2	1996.2	1974.1	1979.5	203
2023-04-19	1998	2007.6	1998	2007.6	204
2023-04-18	2005.7	2006.4	1969.8	1995.2	205
2023-04-17	1996.9	2007.4	1996.9	2007.4	206
2023-04-16	2002.7	2007.6	1983.2	1994.2	207
2023-04-13	2041	2047.8	1995	2002.2	208
2023-04-12	2015.6	2048.6	2015.6	2041.3	209
2023-04-11	2005.2	2025.7	2005.2	2010.9	210
2023-04-10	1991.4	2006.5	1991.4	2004.8	211
2023-04-09	2000	2006.6	1984	1989.1	212
2023-04-05	2022.2	2023.3	2005		213
2023-04-04	2022.1	2033.8	2013.6	2020.9	214
2023-04-03	1984.6	2027.1	1979	2022.2	215
2023-04-02	1968.1	1991.7	1950	1983.9	216
2023-03-30	1981.3	1986.8	1968	1969	217
2023-03-29	1965.9	1984.4	1954.9	1980.3	218
2023-03-28	1966.1	1966.1	1966.1	1966.1	219
2023-03-27	1972.4	1972.4	1972.4	1972.4	220
2023-03-26	1957.2	1957.2	1952.4	1952.4	221
2023-03-23	1991.7	1995.4	1982.1		222
2023-03-22	1990.5	1994.6	1990.5	1993.8	223
2023-03-21	1946.8	1974	1946.8	1946.8	224
2023-03-20	1973.8	1973.8	1938	1938	225
2023-03-19	1988.3	2003.9	1968.9	1979.2	226
2023-03-16	1946	1985.1	1946	1969.8	227
2023-03-15	1909.9	1931.7	1909.9	1919	228
2023-03-14	1903.9	1926.6	1898.5	1926.6	229
2023-03-13	1912.2	1912.2	1901.1		230
2023-03-12	1890.8	1913.1	1875.1	1911.7	231
2023-03-10	1852.3	1868.5	1852	1862	232
2023-03-09	1816.4	1829.3	1815.6	1829.3	233
2023-03-08	1811.6	1812.9	1811.5	1812.7	234
2023-03-07	1840.9	1840.9	1813.9	1813.9	235
2023-03-06	1853.3	1853.8	1844.2	1847.9	236
2023-03-03	1837.3	1855.4	1837.3	1847.7	237
2023-03-02	1830	1836.3	1830	1833.5	238
2023-03-01	1827.1	1841.7	1827.1	1837.7	239
2023-02-28	1808.1	1830	1808.1	1828.9	240
2023-02-27	1811.6	1817.5	1808.9	1817	241
2023-02-24	1808.8	1808.8	1808.8	1808.8	242
2023-02-23	1826.4	1827.5	1818	1818	243
2023-02-22	1835.7	1836.2	1825.1	1832	244
2023-02-21	1842.6	1843	1833	1833	245
2023-02-17	1827.4	1842.2	1818.4	1840.4	246
2023-02-16	1838.6	1843.7	1827.2	1842	247
2023-02-15	1842	1842	1828.2	1834.2	248
2023-02-14	1854.1	1862	1846.2	1854	249
2023-02-13	1859	1861	1850	1851.9	250
2023-02-10	1861.6	1863.5	1852.4	1862.8	251
2023-02-09	1875.3	1884.6	1859.8	1866.2	252
2023-02-08	1872.1	1880.4	1872.1	1877.4	253
2023-02-07	1870	1875.7	1868	1871.7	254
2023-02-06	1865.6	1880	1863.4	1866.2	255
2023-02-03	1912.4	1917	1861.5	1862.9	256
2023-02-02	1952.3	1959.1	1911.3	1916.3	257
2023-02-01	1927.2	1955	1922	1927.8	258
2023-01-31	1923	1930.4	1900.6	1929.5	259
2023-01-30	1928.3	1933.6	1920.3	1922.9	260
2023-01-27	1928.6	1928.6	1928.6	1928.6	261
2023-01-26	1936.6	1937.1	1927.1	1929.1	262
2023-01-25	1941.2	1941.2	1939.8	1941.2	263
2023-01-24	1931.8	1936.8	1931.8	1933.9	264
2023-01-23	1926.5	1927.1	1915	1927.1	265
2023-01-20	1922.1	1928.5	1921.4	1926.4	266
2023-01-19	1922.1	1931.8	1922.1	1922.1	267
2023-01-18	1911.1	1911.1	1903.1	1904.4	268
2023-01-17	1920.1	1920.1	1905.2	1907.2	269
2023-01-13	1899	1920.9	1898.3	1918.4	270
2023-01-12	1877.2	1897.4	1877.2	1895.5	271
2023-01-11	1873.1	1877.8	1873.1	1874.6	272
2023-01-10	1877.8	1878.1	1871.6	1871.6	273
2023-01-09	1867	1880	1867	1872.7	274
2023-01-06	1838.4	1868.2	1835.3	1864.2	275
2023-01-05	1855.2	1855.2	1834.8	1834.8	276
2023-01-04	1845.6	1859.1	1845.6	1852.8	277
2023-01-03	1836.2	1839.7	1836.2	1839.7	278
2022-12-30	1817	1822.3	1816.8		279
2022-12-29	1805.8	1819.5	1805.8	1819.5	280
2022-12-28	1803.2	1807.9	1803.1	1807.9	281
2022-12-27	1803.4	1826.3	1803.4	1814.8	282
2022-12-23	1794.3	1802.8	1794.1	1795.9	283
2022-12-22	1818.1	1818.1	1785	1787	284
2022-12-21	1817.4	1821.4	1814.4	1815.9	285
2022-12-20	1786.5	1821.4	1786.5	1815.9	286
2022-12-19	1791.6	1796.3	1785.6	1787.7	287
2022-12-16	1777.9	1791.4	1777.9	1790	288
2022-12-15	1801	1801	1774.8	1777.2	289
2022-12-14	1810.8	1812.8	1797.9	1807.5	290
2022-12-13	1780.7	1819.8	1780.5	1813.9	291
2022-12-12	1787.3	1793.9	1777.7	1780.5	292
2022-12-09	1794.9	1804.3	1791.1	1798.1	293
2022-12-08	1782	1790.9	1782	1788.7	294
2022-12-07	1769.3	1790.3	1769.3		295
2022-12-06	1768.6	1779.4	1767.9	1769.3	296
2022-12-05	1795.7	1808	1764.3	1767.4	297
2022-12-02	1802	1802.3	1779.4		298
2022-12-01	1768.7	1803.7	1768.7	1801.1	299
2022-11-30	1748.1	1769.4	1745.1	1746	300
2022-11-29	1739.5	1758.2	1737.9	1748.4	301
2022-11-28	1741.3	1741.3	1740.1	1740.1	302
2022-11-25	1753	1757.9	1749.2		303
2022-11-23	1736.5	1750.9	1736.5	1744.9	304
2022-11-22	1741.7	1741.7	1738.3	1738.3	305
2022-11-21	1739	1744.9	1736.1	1737.4	306
2022-11-18	1763.3	1763.3	1747.6	1751.9	307
2022-11-17	1763	1763	1756	1760.8	308
2022-11-16	1776.6	1778.9	1773	1773	309
2022-11-15	1770.8	1773.8	1769.9	1773.8	310
2022-11-14	1762	1773.6	1761.6	1773.6	311
2022-11-11	1763.8	1766	1757.6	1766	312
2022-11-10	1708.2	1750.3	1708.2	1750.3	313
2022-11-09	1707.4	1720.2	1706	1710.1	314
2022-11-08	1703.2	1712.1	1703.2	1712.1	315
2022-11-07	1676.9	1677.9	1672.9	1676.5	316
2022-11-03	1630.2	1674.5	1629	1672.5	317
2022-11-02	1629.2	1629.2	1615.1		318
2022-11-01	1650.8	1664.7	1634	1645.7	319
2022-10-31	1630.8	1653.7	1630.8	1645	320
2022-10-30	1641.8	1641.8	1633.4	1635.9	321
2022-10-27	1661	1661	1638.7	1639.6	322
2022-10-26	1660.7	1660.7	1660.7	1660.7	323
2022-10-25	1649.8	1667	1649.8	1664	324
2022-10-24	1648.2	1652.8	1637.3	1652.8	325
2022-10-23	1662.7	1662.7	1648.7	1648.7	326
2022-10-20	1634.1	1653.9	1634.1	1651	327
2022-10-19	1622.8	1641.4	1622.8	1630.8	328
2022-10-18	1637.5	1637.5	1627.5	1627.5	329
2022-10-17	1651.4	1655.2	1649	1649	330
2022-10-16	1650.2	1657	1646.8	1657	331
2022-10-13	1665.3	1667	1640	1641.7	332
2022-10-12	1675.2	1675.3	1641.5	1670	333
2022-10-11	1668	1672.7	1668	1670.3	334
2022-10-10	1661.8	1678.7	1661	1678.7	335
2022-10-09	1693.4	1693.4	1667	1667.3	336
2022-10-06	1710.1	1710.1	1693.7	1700.5	337
2022-10-05	1721	1723.3	1709.1	1711.7	338
2022-10-04	1724.1	1726.6	1703	1711.4	339
2022-10-03	1701.2	1728	1696	1721.1	340
2022-10-02	1667.2	1700	1661.9	1692.9	341
2022-09-29	1661.7	1672.7	1658	1662.4	342
2022-09-28	1657	1662.6	1640	1658.5	343
2022-09-27	1620.4	1660.4	1620.4	1660.4	344
2022-09-26	1632.2	1636.6	1626.7	1626.7	345
2022-09-25	1623.3	1623.3	1623.3	1623.3	346
2022-09-22	1667	1667	1645.3	1645.3	347
2022-09-21	1668.3	1670.8	1668.3		348
2022-09-20	1665.5	1680.1	1664.6	1664.6	349
2022-09-19	1659.7	1659.7	1659.7	1659.7	350
2022-09-18	1661.8	1669.4	1658.5	1666.2	351
2022-09-15	1660.4	1674.9	1651.7	1671.7	352
2022-09-14	1685.5	1686	1662.3	1665.4	353
2022-09-13	1698.7	1701.8	1696.5	1696.5	354
2022-09-12	1720.5	1720.5	1697.3		355
2022-09-11	1727.4	1728.1	1727.4	1728.1	356
2022-09-08	1719.2	1720	1712.8	1716.2	357
2022-09-07	1718.2	1718.2	1705.3	1708	358
2022-09-06	1694.8	1715.3	1694.7	1715.3	359
2022-09-05	1709.7	1717.4	1699.7	1700.4	360
2022-09-01	1703.4	1715.7	1703.1	1709.8	361
2022-08-31	1707.9	1707.9	1693.9	1696.6	362
2022-08-30	1718.3	1720.9	1708.5	1712.8	363
2022-08-29	1736.4	1739	1720.7		364
2022-08-28	1732.4	1741.2	1732.1	1736.6	365
2022-08-25	1754	1755	1736.1	1736.1	366
2022-08-24	1761.6	1761.8	1755	1757.7	367
2022-08-23	1745	1751.8	1743.6	1747.8	368
2022-08-22	1738	1748.9	1731.9	1746.8	369
2022-08-21	1740.5	1740.5	1726.5	1734	370
2022-08-18	1753.7	1754.3	1747.5	1747.6	371
2022-08-17	1762.9	1762.9	1753.4	1755.3	372
2022-08-16	1769.7	1769.7	1760	1760.3	373
2022-08-15	1777.4	1777.4	1771.4	1773.2	374
2022-08-14	1799	1799	1774.7	1781.4	375
2022-08-11	1786.3	1800.4	1784.3	1798.6	376
2022-08-10	1794.3	1794.3	1785.7	1789.7	377
2022-08-09	1804.4	1804.9	1787.8	1795.6	378
2022-08-08	1790	1796.1	1789	1794	379
2022-08-07	1771.8	1786.8	1771.8	1786.8	380
2022-08-04	1791.2	1791.4	1764.2	1772.9	381
2022-08-03	1769.4	1792.1	1767.7	1788.5	382
2022-08-02	1756.7	1770.5	1753	1758	383
2022-08-01	1772.1	1786.6	1759.4	1771.1	384
2022-07-31	1763.9	1772.5	1756.1	1769	385
2022-07-28	1754	1765.7	1750	1762.9	386
2022-07-27	1732.3	1755	1732		387
2022-07-26	1719.1	1719.1	1719.1	1719.1	388
2022-07-25	1718	1718	1717.7	1717.7	389
2022-07-24	1727	1732	1719	1719	390
2022-07-21	1713.3	1735	1713	1727.1	391
2022-07-20	1687	1715.5	1679.8	1712.7	392
2022-07-19	1707.1	1708.5	1699.5	1699.5	393
2022-07-18	1712.3	1714.4	1706.1	1710	394
2022-07-17	1712.2	1712.4	1709.2	1709.2	395
2022-07-14	1705.4	1709.7	1701.1	1702.4	396
2022-07-13	1710.3	1710.5	1704.5		397
2022-07-12	1710	1734.2	1710	1734.2	398
2022-07-11	1734.2	1735.5	1723.3	1723.3	399
2022-07-10	1732.5	1736.7	1730		400
2022-07-07	1738.1	1749.3	1732.1	1740.6	401
2022-07-06	1745.2	1745.2	1737	1737.9	402
2022-07-05	1762.5	1768	1734	1734.9	403
2022-07-04	1805.4	1805.4	1761.8	1761.8	404
2022-06-30	1795.5	1806.1	1791.6	1798.9	405
2022-06-29	1809.6	1817.3	1801		406
2022-06-28	1818.3	1830.3	1812.8	1813.7	407
2022-06-27	1824.2	1826	1817.5	1817.5	408
2022-06-26	1830.5	1830.7	1819.9	1820.9	409
2022-06-23	1820.5	1826.5	1815.8	1826.5	410
2022-06-22	1835.5	1841.2	1825.7	1825.7	411
2022-06-21	1829.5	1842.7	1821.6	1834.3	412
2022-06-20	1835.3	1838.6	1830.1	1834.6	413
2022-06-16	1853.7	1853.7	1833.6		414
2022-06-15	1819.2	1850.6	1814.9	1845.7	415
2022-06-14	1814.1	1839	1810.8	1815.3	416
2022-06-13	1825	1825.5	1805.3	1809.5	417
2022-06-12	1873.8	1873.8	1818.7	1828	418
2022-06-09	1842.7	1875.6	1823.9	1871.5	419
2022-06-08	1846.1	1850.1	1837.9	1848.8	420
2022-06-07	1844.8	1855	1844.4	1851.9	421
2022-06-06	1836.9	1851.6	1835	1847.5	422
2022-06-05	1849	1854.1	1839.2	1839.2	423
2022-06-02	1867.6	1871.8	1845.4	1845.4	424
2022-06-01	1845.4	1868.7	1842.1	1866.5	425
2022-05-31	1831	1847.9	1825.3	1843.3	426
2022-05-30	1850.3	1862.1	1832.8	1842.7	427
2022-05-26	1848.3	1860.7	1845.9	1851.3	428
2022-05-25	1840.4	1847.4	1840.4	1847.4	429
2022-05-24	1846.2	1846.2	1846.2	1846.2	430
2022-05-23	1852.5	1867	1852.5	1865.1	431
2022-05-22	1846.3	1863	1845.8	1847.8	432
2022-05-19	1839.1	1841.8	1836.3	1841.8	433
2022-05-18	1810.9	1841.2	1810.7	1841.2	434
2022-05-17	1815	1819.7	1805	1815.9	435
2022-05-16	1824.9	1828.6	1816.7	1818.2	436
2022-05-15	1790.5	1813.5	1787	1813.5	437
2022-05-12	1825	1825	1807.4	1807.4	438
2022-05-11	1849.8	1851.9	1822.2	1823.8	439
2022-05-10	1841.5	1852.6	1841	1852.6	440
2022-05-09	1839.9	1839.9	1839.9	1839.9	441
2022-05-08	1866.6	1867.5	1854	1857.1	442
2022-05-05	1874.7	1890.3	1871.5	1881.2	443
2022-05-04	1897	1904.3	1874	1874	444
2022-05-03	1867	1867	1867	1867	445
2022-05-02	1868.8	1868.8	1868.8	1868.8	446
2022-05-01	1896.7	1896.8	1853	1861.8	447
2022-04-28	1902.7	1918.2	1902.4	1909.3	448
2022-04-27	1883.8	1893	1872.9		449
2022-04-26	1897.8	1900.6	1882.2	1885.9	450
2022-04-25	1900.5	1909.1	1894	1901.4	451
2022-04-24	1925	1925	1889.3	1893.2	452
2022-04-21	1949.6	1950.4	1930.2		453
2022-04-20	1942.5	1944.9	1942.5	1944.9	454
2022-04-19	1945.5	1953.6	1945.5	1952.3	455
2022-04-18	1973.8	1978.3	1945.7	1955.7	456
2022-04-17	1973.4	1997.1	1972.8	1982.9	457
2022-04-13	1977.2	1978.7	1963	1970.9	458
2022-04-12	1969.5	1981	1969.5		459
2022-04-11	1952.5	1977.1	1950.6	1972.1	460
2022-04-10	1946.6	1968.4	1941.8	1944.3	461
2022-04-07	1928.8	1947.7	1928.8	1941.6	462
2022-04-06	1919.5	1934.8	1919.5	1933.8	463
2022-04-05	1916.7	1931.8	1916.7	1918.4	464
2022-04-04	1927.1	1943.5	1918.4	1922.9	465
2022-04-03	1921.2	1936.1	1915.6		466
2022-03-31	1935	1938	1917	1919.1	467
2022-03-30	1933.5	1949.9	1919.1	1949.2	468
2022-03-29	1918.4	1937	1914.5	1933.5	469
2022-03-28	1893.5	1912	1893.5	1912	470
2022-03-27	1932.6	1939.6	1932.6	1939.6	471
2022-03-24	1953.8	1953.8	1953.8		472
2022-03-23	1963.6	1964	1961.6	1961.6	473
2022-03-22	1936.6	1936.6	1936.6	1936.6	474
2022-03-21	1920.7	1920.7	1920.7	1920.7	475
2022-03-20	1925.4	1928.6	1925	1928.6	476
2022-03-17	1934.5	1939.3	1928.2	1928.2	477
2022-03-16	1933.9	1947.2	1933.9	1942.1	478
2022-03-15	1922.4	1922.4	1907.2		479
2022-03-14	1939.8	1939.9	1910.7	1928.5	480
2022-03-13	1976.5	1977.7	1959.6	1959.6	481
2022-03-11	1985	1996	1959.9	1982.7	482
2022-03-10	1978.1	2010.5	1978.1		483
2022-03-09	2053.6	2063	1980.8	1985.9	484
2022-03-08	1999.4	2072	1998	2040.1	485
2022-03-07	1989	2001.1	1963	1993.9	486
2022-03-04	1937	1970.9	1935.6	1965.1	487
2022-03-03	1930.5	1940.3	1924.8	1934.4	488
2022-03-02	1945.6	1948.2	1919.8	1920.9	489
2022-03-01	1908.3	1942.4	1903.8	1942.4	490
2022-02-28	1928.3	1928.4	1894.2	1899.4	491
2022-02-24	1906.9	1920	1883.6	1886.5	492
2022-02-24	1911.9	1972.5	1911.7		493
2022-02-23	1896.6	1910.6	1895.7	1909.2	494
2022-02-22	1908.1	1912	1890.8	1906.1	495
2022-02-18	1899.4	1899.4	1890.7		496
2022-02-17	1876.3	1900.7	1876.2	1900.7	497
2022-02-16	1858.7	1870.2	1856.3	1870.2	498
2022-02-15	1872.6	1879.7	1847.4	1854.8	499
2022-02-14	1861.8	1870.6	1854.6	1868	500
2022-02-11	1822	1864.8	1822	1840.8	501
2022-02-10	1833.3	1842.1	1820.8	1836.2	502
2022-02-09	1825.4	1835.2	1825.3		503
2022-02-08	1818.9	1827.6	1815	1826.6	504
2022-02-07	1812.2	1821.3	1809.1	1820.6	505
2022-02-04	1806	1813.7	1792.5	1806.6	506
2022-02-03	1805.8	1808.1	1787.9	1803	507
2022-02-02	1797.8	1810.1	1795.1	1809.2	508
2022-02-01	1797.2	1806.1	1797.1	1800.3	509
2022-01-31	1788.5	1798.5	1785.1	1795	510
2022-01-28	1797.5	1798.4	1778.8	1784.9	511
2022-01-27	1793.3	1793.3	1793.3	1793.3	512
2022-01-26	1829.9	1829.9	1829.9	1829.9	513
2022-01-25	1843	1852.7	1842	1852.7	514
2022-01-24	1837.9	1842.1	1837.9	1841.7	515
2022-01-21	1838	1842.4	1828.9	1831.8	516
2022-01-20	1840.6	1843	1838.2	1842.5	517
2022-01-19	1817.4	1843.1	1817.4	1843.1	518
2022-01-18	1816.8	1820.1	1812.3	1812.3	519
2022-01-14	1821.5	1822	1816.5	1816.5	520
2022-01-13	1819.8	1823	1815.4	1821.2	521
2022-01-12	1819	1827.2	1816.9	1827.2	522
2022-01-11	1803.9	1822.5	1803	1818.6	523
2022-01-10	1794.9	1798.7	1790.4	1798.4	524
2022-01-07	1791.8	1797	1784.4	1797	525
2022-01-06	1787.1	1791.3	1787.1	1788.7	526
2022-01-05	1813.1	1824.6	1813.1	1824.6	527
2022-01-04	1800.5	1815.3	1800	1814	528
2022-01-03	1830.1	1830.1	1798.8	1799.4	529
2021-12-31	1825.1	1827.8	1821.4	1827.5	530
2021-12-30	1801.7	1816	1796	1812.7	531
2021-12-29	1803.2	1805.1	1791.4	1805.1	532
2021-12-28	1812	1818	1805.5	1810.2	533
2021-12-27	1810	1812.1	1807	1808.1	534
2021-12-23	1806	1811.2	1800.8	1811.2	535
2021-12-22	1786	1805.2	1785.5	1801.6	536
2021-12-21	1791.4	1796.5	1787.9	1787.9	537
2021-12-20	1796.8	1799.8	1792	1793.7	538
2021-12-17	1804	1812.9	1803.8	1803.8	539
2021-12-16	1781	1798.1	1781		540
2021-12-15	1767.4	1778.7	1753.9	1762.6	541
2021-12-14	1787	1787	1769	1770.4	542
2021-12-13	1784.4	1787.1	1783.8	1786.3	543
2021-12-10	1773.8	1785.4	1769.1	1782.9	544
2021-12-09	1783.5	1783.5	1771.8	1774.6	545
2021-12-08	1789.9	1789.9	1779	1783.4	546
2021-12-07	1779.5	1786.1	1772.3	1782.6	547
2021-12-06	1780.2	1783	1777.2	1777.5	548
2021-12-03	1767.5	1785.1	1766.5	1782	549
2021-12-02	1780.9	1780.9	1760.6	1760.7	550
2021-12-01	1774.8	1790.5	1772.3	1781.6	551
2021-11-30	1783.9	1808.1	1768.7	1773.6	552
2021-11-29	1791.7	1798.9	1779.1	1782.3	553
2021-11-26	1791.1	1791.4	1785.3	1785.3	554
2021-11-24	1793	1793	1781.4	1784.1	555
2021-11-23	1795.5	1795.5	1783.5	1783.5	556
2021-11-22	1841.6	1841.6	1805.7	1806	557
2021-11-19	1851.2	1851.2	1851.2	1851.2	558
2021-11-18	1861	1861	1861	1861	559
2021-11-17	1862.6	1869.7	1862.6	1869.7	560
2021-11-16	1853.6	1853.6	1853.6	1853.6	561
2021-11-15	1864.5	1866.9	1864.5		562
2021-11-12	1860.8	1867.9	1847.6	1867.9	563
2021-11-11	1853.9	1866.5	1853.9	1863.2	564
2021-11-10	1825.8	1865	1824.9	1847.6	565
2021-11-09	1826.1	1832.7	1820.7	1830.2	566
2021-11-08	1817	1827.4	1816.9	1827.4	567
2021-11-04	1794.9	1817.1	1794.9	1816.4	568
2021-11-03	1776.6	1798.2	1776.2	1793	569
2021-11-02	1768	1768	1761.8	1763.6	570
2021-11-01	1790.5	1795.5	1787.7		571
2021-10-31	1787.5	1795.1	1786.7		572
2021-10-29	1793.1	1797	1774.6	1783	573
2021-10-27	1795.5	1807.3	1795.5	1801.6	574
2021-10-26	1791.5	1798.1	1791.5	1797.9	575
2021-10-25	1808.8	1808.8	1788.6	1792.7	576
2021-10-24	1794.3	1809	1794	1806	577
2021-10-21	1787.1	1806.9	1784	1795.5	578
2021-10-20	1782	1785.7	1781		579
2021-10-19	1774.6	1785.6	1774	1784.1	580
2021-10-18	1777.6	1785	1767.5	1769.7	581
2021-10-17	1761.6	1770.1	1759.5	1764.8	582
2021-10-14	1794.5	1795.4	1766.6		583
2021-10-13	1792.2	1799.9	1792	1796.7	584
2021-10-12	1760.8	1794.5	1760.8	1793.7	585
2021-10-11	1751.9	1768	1749.8	1758.3	586
2021-10-10	1756.6	1757.8	1752.2	1754.6	587
2021-10-07	1757	1780	1754.2	1756.3	588
2021-10-06	1762.4	1762.4	1752.8	1757.9	589
2021-10-05	1759.3	1762.9	1744.7	1760.5	590
2021-10-04	1764.3	1764.3	1749	1759.6	591
2021-10-03	1764.5	1768.9	1749.5	1766.2	592
2021-09-30	1754.3	1762.6	1748.5		593
2021-09-29	1725.5	1760.3	1724.5	1755.3	594
2021-09-28	1732.4	1744.1	1721.4	1721.5	595
2021-09-27	1739.6	1741.7	1726.8	1735.8	596
2021-09-26	1751.7	1754.4	1747.5	1750	597
2021-09-23	1749.7	1749.7	1745	1749.7	598
2021-09-22	1766.8	1766.8	1738.2	1747.7	599
2021-09-21	1776.7	1784.3	1767	1776.7	600
2021-09-20	1762.2	1776	1759		601
2021-09-19	1751.8	1761.8	1750.9	1761.8	602
2021-09-16	1758.8	1763	1749.4	1749.4	603
2021-09-15	1792.9	1792.9	1743.9	1754.6	604
2021-09-14	1803.7	1803.7	1792.4	1792.4	605
2021-09-13	1791.4	1806.2	1783	1804.7	606
2021-09-12	1789.8	1796	1784	1792	607
2021-09-09	1789.6	1789.6	1789.6	1789.6	608
2021-09-08	1798.7	1798.7	1787.9	1797.4	609
2021-09-07	1781.7	1790.7	1781.7	1790.7	610
2021-09-06	1825.7	1825.7	1792.7	1795.9	611
2021-09-02	1820.9	1833.9	1818.9	1830.9	612
2021-09-01	1813.2	1813.9	1806.8	1808.7	613
2021-08-31	1813.5	1815.9	1809.5	1813.1	614
2021-08-30	1815.9	1815.9	1801.1	1815	615
2021-08-29	1818.2	1820.3	1807.8	1809	616
2021-08-26	1803.4	1816.6	1803.1	1816.6	617
2021-08-25	1787.4	1792.2	1781	1792.2	618
2021-08-24	1792	1792.9	1784	1788.2	619
2021-08-23	1801	1805.6	1801	1805.6	620
2021-08-22	1776.8	1804.8	1776.8	1803.2	621
2021-08-19	1784.1	1787.5	1778.2	1781	622
2021-08-18	1780	1789.3	1775.5	1780.2	623
2021-08-17	1787.8	1791.5	1779		624
2021-08-16	1787.7	1794.2	1780	1785	625
2021-08-15	1776.9	1787.8	1771.9	1786.9	626
2021-08-12	1758.3	1777.3	1757.4	1775.2	627
2021-08-11	1749.7	1752.4	1745.5	1749	628
2021-08-10	1727.3	1752.2	1727.3	1750.4	629
2021-08-09	1728.6	1735.2	1720.1	1728.8	630
2021-08-08	1753.5	1753.8	1692.6	1723.4	631
2021-08-05	1799.8	1800.1	1758.4	1760	632
2021-08-04	1810.8	1813.7	1796	1805.1	633
2021-08-03	1809.3	1831.3	1806.3		634
2021-08-02	1812.3	1813.5	1806	1810.1	635
2021-08-01	1812.4	1818.7	1804.8	1818.1	636
2021-07-29	1828	1830.5	1808.9	1812.6	637
2021-07-28	1806.6	1832.6	1806.1	1831.2	638
2021-07-27	1799.5	1799.5	1799.5	1799.5	639
2021-07-26	1803.7	1803.7	1799.5	1799.5	640
2021-07-25	1802.5	1802.5	1797.2	1798.7	641
2021-07-22	1800	1801.4	1800	1801.4	642
2021-07-21	1793.6	1805	1793.6		643
2021-07-20	1807	1807	1800		644
2021-07-19	1812.9	1824	1810.9	1810.9	645
2021-07-18	1803.3	1813.4	1803.3	1808.7	646
2021-07-15	1830.1	1831.4	1814.5		647
2021-07-14	1831.6	1833	1823.4	1828.4	648
2021-07-13	1813.1	1829	1813.1	1824.3	649
2021-07-12	1808.1	1812	1800.6	1809.4	650
2021-07-11	1802.6	1805.5	1799.5	1805.5	651
2021-07-08	1803.6	1810.1	1798.8	1810	652
2021-07-07	1797	1818.5	1797	1799.6	653
2021-07-06	1798.7	1808.4	1797.2	1801.5	654
2021-07-05	1786.7	1809.8	1786.7	1793.5	655
2021-07-01	1778.7	1787.9	1778.3	1782.6	656
2021-06-30	1775.7	1781.2	1768.8	1775.9	657
2021-06-29	1761.1	1770.8	1759.2	1770.8	658
2021-06-28	1776.8	1777.1	1752.1	1762.8	659
2021-06-27	1779.6	1779.6	1779.6	1779.6	660
2021-06-24	1777.7	1788	1775.2	1776.6	661
2021-06-23	1778.9	1786.4	1775.6	1775.6	662
2021-06-22	1780.7	1793.2	1780.6	1782.3	663
2021-06-21	1783.4	1786.9	1775.9	1776.3	664
2021-06-20	1768.8	1785.2	1766.8	1781.8	665
2021-06-17	1775.7	1792.4	1767.9	1767.9	666
2021-06-16	1811.8	1823.3	1769.6	1773.8	667
2021-06-15	1859.4	1860.1	1809.2	1859.5	668
2021-06-14	1866.4	1867.2	1854.4	1854.5	669
2021-06-13	1866.2	1866.6	1846.5	1864	670
2021-06-10	1900.9	1902.3	1875.2		671
2021-06-09	1887.7	1899.8	1871.5	1894.2	672
2021-06-08	1894.9	1897.7	1889.2		673
2021-06-07	1896.5	1902.9	1890	1892.2	674
2021-06-06	1890.5	1899.7	1883.2	1896.8	675
2021-06-03	1869.3	1895.5	1854	1889.8	676
2021-06-02	1908.8	1908.8	1865		677
2021-06-01	1899.2	1908.8	1896	1907.5	678
2021-05-31	1905.1	1916.2	1892.8	1902.9	679
2021-05-27	1897.5	1905.4	1881.9	1902.5	680
2021-05-26	1896.8	1903.9	1888.2	1895.7	681
2021-05-25	1901.3	1901.3	1901.3	1901.3	682
2021-05-24	1882.5	1898.1	1882.5	1898.1	683
2021-05-23	1882.1	1884.6	1882.1	1884.6	684
2021-05-20	1872.1	1876.7	1872.1	1876.7	685
2021-05-19	1865.5	1885	1864.8	1881.8	686
2021-05-18	1866.4	1884.9	1863.6	1881.3	687
2021-05-17	1870.5	1870.5	1867.8	1867.8	688
2021-05-16	1849.9	1867.5	1847.2	1867.5	689
2021-05-13	1824.5	1842.9	1824.5	1837.9	690
2021-05-12	1814.7	1826.8	1814.1	1823.8	691
2021-05-11	1825.2	1825.2	1821.7	1822.6	692
2021-05-10	1837.2	1838.1	1831.6		693
2021-05-09	1835.6	1845.6	1835.4	1837.5	694
2021-05-06	1842.9	1842.9	1831.1	1831.1	695
2021-05-05	1788.9	1815.5	1787.6	1815.5	696
2021-05-04	1781.5	1784.1	1779.2	1784.1	697
2021-05-03	1788.2	1788.5	1774.8	1775.8	698
2021-05-02	1788.5	1793	1788.5		699
2021-04-29	1771.8	1771.8	1763.9	1767.3	700
2021-04-28	1781	1789	1758.6	1768.1	701
2021-04-27	1768.2	1774	1764.6	1773.2	702
2021-04-26	1780	1782	1777.7	1778	703
2021-04-25	1778	1779.7	1770.8	1779.2	704
2021-04-22	1786.1	1794.5	1772	1777	705
2021-04-21	1794.2	1794.2	1779.5	1781.2	706
2021-04-20	1783	1794.1	1777.7	1792.3	707
2021-04-19	1769.3	1777.3	1765.5	1777.3	708
2021-04-18	1782.1	1788.5	1769.4	1769.4	709
2021-04-15	1770.4	1779.5	1770.1	1779	710
2021-04-14	1740.1	1767.9	1740.1		711
2021-04-13	1741.3	1745.9	1732.7	1734.9	712
2021-04-12	1733.8	1746.9	1722.1	1746.2	713
2021-04-11	1740.8	1740.8	1726.7		714
2021-04-08	1750.8	1750.8	1733.3	1743.3	715
2021-04-07	1736	1758	1734.6	1756.8	716
2021-04-06	1742.7	1742.7	1733.7	1740.1	717
2021-04-05	1726.9	1744.8	1726.9	1741.5	718
2021-04-04	1727.9	1729.7	1721.9	1727	719
2021-03-31	1706.8	1728.8	1706.4	1726.5	720
2021-03-30	1683.7	1713.8	1676.5	1713.8	721
2021-03-29	1711	1712.6	1676.5	1683.9	722
2021-03-28	1712.1	1712.1	1712.1		723
2021-03-25	1721.3	1732.2	1721.3	1732.2	724
2021-03-24	1732.7	1733.2	1724.5	1724.9	725
2021-03-23	1727.5	1732.9	1727.5		726
2021-03-22	1724.7	1724.7	1724.7	1724.7	727
2021-03-21	1737.8	1737.8	1737.8	1737.8	728
2021-03-18	1742.2	1742.2	1733.6	1741.4	729
2021-03-17	1745.8	1750.3	1721.8	1732.2	730
2021-03-16	1735.3	1750.1	1725.6	1726.8	731
2021-03-15	1732.3	1733.9	1726		732
2021-03-14	1729.5	1731.9	1722.8		733
2021-03-12	1715.9	1722.5	1699		734
2021-03-11	1725.6	1737.5	1720.2	1722.3	735
2021-03-10	1713.6	1722.9	1711	1721.5	736
2021-03-09	1686.2	1717.5	1685.2	1716.6	737
2021-03-08	1704.7	1705.4	1673.7	1677.7	738
2021-03-05	1690.6	1701	1685	1698	739
2021-03-04	1706.5	1717.4	1700.2	1700.2	740
2021-03-03	1730	1732.4	1703.5	1715.3	741
2021-03-02	1709.4	1733.1	1708.7		742
2021-03-01	1737.1	1747	1720.3	1722.5	743
2021-02-26	1768.1	1768.2	1718.8	1728.1	744
2021-02-25	1801.5	1802	1766.7	1774.4	745
2021-02-24	1805.8	1805.8	1796.4	1796.4	746
2021-02-23	1809.6	1811.3	1796.4	1804.4	747
2021-02-22	1784	1807.8	1784	1806.7	748
2021-02-19	1764.3	1787.6	1764.3	1775.8	749
2021-02-18	1776.1	1784.6	1766	1773.4	750
2021-02-17	1785.8	1789.7	1768.8	1771.1	751
2021-02-16	1820.9	1823.4	1787.3		752
2021-02-12	1825	1827.5	1809.2	1821.6	753
2021-02-11	1840.5	1845	1820.9	1824.9	754
2021-02-10	1842.6	1851.1	1837	1840.6	755
2021-02-09	1841.9	1843.3	1830.7	1835.3	756
2021-02-08	1816.3	1836.7	1809	1831.9	757
2021-02-05	1794.3	1813.5	1790.9	1810.9	758
2021-02-04	1832.2	1832.2	1782.8	1788.9	759
2021-02-03	1834.8	1842.4	1829.8	1832.2	760
2021-02-02	1859.6	1861.3	1827.6	1830.5	761
2021-02-01	1866.6	1871.9	1850	1860.8	762
2021-01-29	1842	1876	1838.7	1847.3	763
2021-01-28	1843.4	1862.9	1831.5	1837.9	764
2021-01-27	1844.9	1844.9	1844.9	1844.9	765
2021-01-26	1855.8	1855.8	1850.7	1850.7	766
2021-01-25	1864.7	1864.7	1851.8	1854.9	767
2021-01-22	1854.9	1855.7	1852.7	1855.7	768
2021-01-21	1865.3	1868	1865.3	1865.3	769
2021-01-20	1847.8	1866.6	1844.4	1865.9	770
2021-01-19	1802	1842.9	1802	1839.5	771
2021-01-15	1829.4	1829.4	1825	1829.3	772
2021-01-14	1836.7	1850.7	1836.7	1850.3	773
2021-01-13	1858	1858.6	1853.6	1853.6	774
2021-01-12	1849	1859.7	1839.4	1842.9	775
2021-01-11	1826.5	1849.6	1826.5	1849.6	776
2021-01-08	1908	1908	1834.1	1834.1	777
2021-01-07	1922.6	1926.7	1912	1912.3	778
2021-01-06	1952	1959.9	1901.5	1906.9	779
2021-01-05	1941.7	1952.7	1941.3	1952.7	780
2021-01-04	1912.2	1945.1	1912.2	1944.7	781
2020-12-31	1897	1901.3	1892.7	1893.1	782
2020-12-30	1879.9	1895.8	1877.3	1891	783
2020-12-29	1881.3	1881.3	1879.7	1879.7	784
2020-12-28	1895.5	1895.8	1873.7	1877.2	785
2020-12-24	1877.3	1879.9	1875.7		786
2020-12-23	1867	1878.8	1864.5	1874.7	787
2020-12-22	1882.2	1882.2	1861	1866.6	788
2020-12-21	1884.8	1908	1869.1	1879.2	789
2020-12-18	1882.4	1889.5	1882.3	1885.7	790
2020-12-17	1874.2	1896.2	1874.2	1887.2	791
2020-12-16	1856.5	1864.7	1850.5	1856.1	792
2020-12-15	1833.5	1853.6	1833.2	1852.3	793
2020-12-14	1835.5	1835.7	1822.7	1828.7	794
2020-12-11	1838.5	1846	1829.1	1839.8	795
2020-12-10	1833.2	1849.1	1828	1833.6	796
2020-12-09	1867.1	1867.1	1827	1834.6	797
2020-12-08	1863	1875.8	1861.8	1870.8	798
2020-12-07	1836.5	1866.9	1820.8	1861.8	799
2020-12-04	1840.7	1847.6	1828.2	1835.9	800
2020-12-03	1829.2	1842	1825.3	1836.8	801
2020-12-02	1811.3	1830	1807.8	1825.7	802
2020-12-01	1775	1815.9	1774.9	1814.1	803
2020-11-30	1785	1787.2	1762.3	1775.7	804
2020-11-27	1806.1	1817	1770.7	1781.9	805
2020-11-25	1801.4	1805.7	1801.4	1805.7	806
2020-11-24	1829.3	1829.3	1799.3	1804.8	807
2020-11-23	1834.8	1837.8	1829.2	1837.8	808
2020-11-20	1871.2	1872.6	1871.2	1872.6	809
2020-11-19	1865.8	1865.8	1856	1861.1	810
2020-11-18	1873.5	1873.5	1873.5		811
2020-11-17	1888.4	1888.4	1884.5	1884.5	812
2020-11-16	1874.6	1887.3	1871	1887.3	813
2020-11-13	1877	1890.1	1876.8	1885.7	814
2020-11-12	1869	1878.5	1866.6	1872.6	815
2020-11-11	1878.8	1878.8	1855.5		816
2020-11-10	1879.3	1885.3	1871.2	1875.4	817
2020-11-09	1955.6	1963.2	1847.1	1853.2	818
2020-11-06	1940.8	1958.8	1940.8	1950.3	819
2020-11-05	1901.7	1948	1901.7	1945.3	820
2020-11-04	1893.8	1907	1885.3	1894.6	821
2020-11-03	1891.5	1908.5	1891.5	1908.5	822
2020-11-02	1872.9	1894.7	1872.9		823
2020-10-30	1862.8	1886.6	1862.8	1877.4	824
2020-10-28	1876.1	1879.8	1858.8	1865.6	825
2020-10-27	1870.9	1876.2	1870.9	1876.2	826
2020-10-26	1904.6	1908.8	1904.4	1908.8	827
2020-10-25	1895.5	1907	1893.5	1902.7	828
2020-10-22	1899.9	1913.3	1896.2	1902	829
2020-10-21	1924.3	1924.3	1898.2	1901.1	830
2020-10-20	1913.6	1927.3	1913.6	1924.6	831
2020-10-19	1901.3	1910.4	1896.1	1910.4	832
2020-10-18	1907.3	1907.8	1899.5	1906.4	833
2020-10-15	1898.5	1900.8	1898.5	1900.8	834
2020-10-14	1897.3	1906.3	1889.6	1903.2	835
2020-10-13	1889.7	1910.8	1882.5	1901.3	836
2020-10-12	1921.9	1922.2	1887	1888.5	837
2020-10-11	1924	1926.5	1921.6	1922.5	838
2020-10-08	1909.3	1929.1	1905.1	1919.5	839
2020-10-07	1893	1893	1882.7	1888.6	840
2020-10-06	1874.1	1889.8	1873.1	1883.6	841
2020-10-05	1906.6	1918	1874.4	1901.1	842
2020-10-04	1898.9	1915.6	1884.7	1912.5	843
2020-10-01	1893.9	1913	1893.9	1900.2	844
2020-09-30	1884.1	1909.6	1882.5	1908.4	845
2020-09-29	1893	1899.7	1879.8	1887.5	846
2020-09-28	1876.5	1895.4	1872.4	1894.3	847
2020-09-27	1872.8	1872.8	1872.8		848
2020-09-24	1856.3	1857.7	1856.3	1857.7	849
2020-09-23	1851.5	1868.3	1851.5	1868.3	850
2020-09-22	1875.5	1875.5	1859.9	1859.9	851
2020-09-21	1913.1	1913.1	1898.6		852
2020-09-20	1946.2	1946.2	1883.4	1901.2	853
2020-09-17	1950.5	1952.1	1949	1952.1	854
2020-09-16	1939	1946	1933.7	1940	855
2020-09-15	1961.3	1961.4	1956.7	1960.2	856
2020-09-14	1955.8	1968.5	1955.8	1956.3	857
2020-09-13	1946.3	1953.1	1943	1953.1	858
2020-09-10	1944	1949.5	1937.8	1937.8	859
2020-09-09	1944.1	1962.7	1944.1	1954.2	860
2020-09-08	1926.9	1946.2	1924.6	1944.7	861
2020-09-07	1930.9	1937.9	1903.1		862
2020-09-03	1927.9	1939.7	1917.7	1923.9	863
2020-09-02	1937.1	1938.8	1923	1927.6	864
2020-09-01	1967.3	1967.3	1934.4	1934.4	865
2020-08-31	1961.7	1986.3	1961.7		866
2020-08-30	1970	1971.3	1953.3	1967.6	867
2020-08-27	1927.1	1971.3	1922.5		868
2020-08-26	1948.9	1972.5	1921.6	1921.6	869
2020-08-25	1909.7	1950.8	1909.7	1940.7	870
2020-08-24	1927.5	1928.5	1911.8		871
2020-08-23	1930.2	1940	1922.2	1927.7	872
2020-08-20	1941	1945	1908.9		873
2020-08-19	1941.2	1948.3	1922.3	1933.8	874
2020-08-18	1980	1980	1938.7	1958.7	875
2020-08-17	2001.1	2002.8	1972.1	1999.4	876
2020-08-16	1949.6	1985	1949.6	1985	877
2020-08-13	1938.7	1947.4	1937	1937	878
2020-08-12	1921.5	1957.4	1916.9	1956.7	879
2020-08-11	1923	1946.6	1871.6	1934.9	880
2020-08-10	2012.4	2016	1904	1932.6	881
2020-08-09	2026.4	2043.8	2017.5	2024.4	882
2020-08-06	2040.1	2055	2009.6	2010.1	883
2020-08-05	2045.5	2063	2040	2051.5	884
2020-08-04	2024	2050.2	2011	2031.1	885
2020-08-03	1971	2016.2	1968.8	2001.2	886
2020-08-02	1984.3	1984.3	1955.5	1966	887
2020-07-30	1948.6	1981.1	1948	1962.8	888
2020-07-29	1963.4	1965.1	1930	1942.3	889
2020-07-28	1953.2	1953.5	1952.6	1953.5	890
2020-07-27	1931.5	1944.7	1928.6	1944.7	891
2020-07-26	1901.7	1938	1901.5	1931	892
2020-07-23	1884.3	1897.3	1884.3	1897.3	893
2020-07-22	1868.7	1890.3	1868.5	1889.1	894
2020-07-21	1858.1	1867	1854.7	1864.1	895
2020-07-20	1822	1842.4	1822	1842.4	896
2020-07-19	1807	1817.3	1807	1815.9	897
2020-07-16	1798.5	1810.1	1798.5		898
2020-07-15	1810.9	1810.9	1794.3	1798.7	899
2020-07-14	1806.1	1813.5	1806.1	1811.4	900
2020-07-13	1791	1811.5	1791	1810.6	901
2020-07-12	1805	1811	1805	1811	902
2020-07-09	1805.5	1805.5	1797.7	1798.2	903
2020-07-08	1816.1	1819.8	1799.2		904
2020-07-07	1801.5	1817.9	1801.5	1815.5	905
2020-07-06	1789.3	1804.2	1783.3	1804.2	906
2020-07-05	1788.2	1790.1	1788.2	1788.5	907
2020-07-01	1773.4	1784	1768.7	1784	908
2020-06-30	1793.6	1798	1765.8	1773.2	909
2020-06-29	1777.3	1793.2	1774.4	1793	910
2020-06-28	1779.8	1780.2	1774.3	1774.8	911
2020-06-25	1766	1772.5	1764.7	1772.5	912
2020-06-24	1761.7	1764.8	1759.8	1762.1	913
2020-06-23	1778.3	1783.1	1764.5	1765.8	914
2020-06-22	1755.4	1776.3	1754.2	1772.1	915
2020-06-21	1755.2	1767.6	1750.5		916
2020-06-18	1723.7	1750.7	1723.5	1745.9	917
2020-06-17	1730.5	1734.1	1717.3	1724.8	918
2020-06-16	1714.7	1729.2	1714.7	1729.2	919
2020-06-15	1726.3	1729.6	1722.4		920
2020-06-14	1730	1730	1703.3	1720.3	921
2020-06-11	1724.9	1743	1724.9	1729.3	922
2020-06-10	1737.2	1744.1	1720	1732	923
2020-06-09	1716.1	1740.8	1711.9	1713.3	924
2020-06-08	1694.6	1720.9	1692	1714.7	925
2020-06-07	1679.1	1699.4	1675.9	1698.3	926
2020-06-04	1711.8	1711.8	1668.6	1676.2	927
2020-06-03	1694.5	1718.9	1694.5	1718.9	928
2020-06-02	1726.3	1726.3	1684.5	1697.8	929
2020-06-01	1743	1745.5	1721.8	1725.2	930
2020-05-31	1740.4	1747	1727.1	1737.8	931
2020-05-28	1718.8	1738.3	1715.1	1736.9	932
2020-05-27	1709.3	1727.8	1705	1713.3	933
2020-05-26	1685.6	1710.3	1685.6	1710.3	934
2020-05-25	1726.4	1726.4	1704.8	1704.8	935
2020-05-21	1726.6	1734.6	1726.6	1734.6	936
2020-05-20	1746.8	1746.8	1720.5	1720.5	937
2020-05-19	1751.6	1752.1	1745.6	1750.6	938
2020-05-18	1744.2	1749.5	1744.2	1744.2	939
2020-05-17	1755.7	1770.5	1731.8	1731.8	940
2020-05-14	1739.7	1753.4	1739.7	1753.4	941
2020-05-13	1724.3	1743.1	1720.5	1738.1	942
2020-05-12	1702	1721.3	1701.9	1713.9	943
2020-05-11	1699.3	1713.1	1699.3	1704.4	944
2020-05-10	1702.3	1704.5	1690.2	1695.3	945
2020-05-07	1726.2	1728.9	1703.8	1709.9	946
2020-05-06	1686.2	1721.8	1685.6	1721.8	947
2020-05-05	1704	1704	1684.2	1684.2	948
2020-05-04	1701.5	1704.4	1697.2	1704.4	949
2020-05-03	1702.6	1709	1699.6	1706.9	950
2020-04-30	1686.6	1701.5	1670.5		951
2020-04-29	1719.3	1719.3	1680.8	1684.2	952
2020-04-28	1710	1713.5	1702	1703.4	953
2020-04-27	1716.6	1716.6	1707.1		954
2020-04-26	1731.9	1731.9	1711.9	1711.9	955
2020-04-23	1744	1744	1714.5		956
2020-04-22	1734	1745.1	1733.3		957
2020-04-21	1696	1728.7	1684.8	1728.7	958
2020-04-20	1697	1707.1	1659.9	1678.2	959
2020-04-19	1686	1701.6	1680	1701.6	960
2020-04-16	1715.7	1725	1684.9	1689.2	961
2020-04-15	1731	1750.6	1715	1720.4	962
2020-04-14	1739.4	1744.9	1722.7	1727.2	963
2020-04-13	1756.8	1775	1739.5	1756.7	964
2020-04-12	1722	1756.8	1710.7	1744.8	965
2020-04-08	1662.7	1736.2	1662.7	1736.2	966
2020-04-07	1669.7	1677	1662.5	1665.4	967
2020-04-06	1695.7	1724.4	1658	1664.8	968
2020-04-05	1629.1	1696.7	1625.9	1677	969
2020-04-02	1624.5	1636	1619.8	1633.7	970
2020-04-01	1590.9	1631.2	1586	1625.7	971
2020-03-31	1570	1600	1570		972
2020-03-30	1618.7	1621	1576		973
2020-03-29	1641.2	1652.8	1607.2	1622	974
2020-03-26	1623.9	1623.9	1623.9	1623.9	975
2020-03-25	1660.5	1660.5	1650.1		976
2020-03-24	1676.5	1676.5	1631.1	1632.3	977
2020-03-23	1592.7	1685.5	1592.7	1660.2	978
2020-03-22	1505.3	1567	1490.2	1567	979
2020-03-19	1483.5	1484	1483.5	1484	980
2020-03-18	1481.5	1491.6	1471	1478.6	981
2020-03-17	1537.5	1542	1477.3	1477.3	982
2020-03-16	1469.3	1537.7	1469.3	1524.9	983
2020-03-15	1569.1	1569.1	1452.1	1485.9	984
2020-03-12	1574.9	1589.8	1513.8	1515.7	985
2020-03-11	1637	1647.5	1566.4	1589.3	986
2020-03-10	1656.6	1666.5	1635	1641.4	987
2020-03-09	1671.6	1674.6	1643	1659.1	988
2020-03-08	1696.1	1701.6	1657.7	1674.5	989
2020-03-06	1670.8	1686.2	1647.2	1670.8	990
2020-03-05	1637.3	1672.9	1637.2	1666.4	991
2020-03-04	1645.4	1645.9	1631.3	1641.1	992
2020-03-03	1594.5	1645.3	1594	1642.1	993
2020-03-02	1583.9	1608.3	1574.3	1592.3	994
2020-02-28	1640.3	1642.5	1564.1	1564.1	995
2020-02-27	1641.1	1658	1638.5	1640	996
2020-02-26	1644	1648.1	1636.4	1640	997
2020-02-25	1645.1	1653.7	1632.3	1646.9	998
2020-02-24	1657	1686.6	1650	1672.4	999
2020-02-21	1619.3	1645	1619.3		1000
2020-02-20	1606.5	1621	1603	1616.6	1001
2020-02-19	1600.6	1610.5	1599.7	1607.5	1002
2020-02-18	1579.8	1604.3	1579.8	1600	1003
2020-02-14	1575.8	1582.7	1574.8	1582.7	1004
2020-02-13	1570.2	1575.1	1570.2		1005
2020-02-12	1565.2	1568.7	1561		1006
2020-02-11	1570.9	1571.1	1561.9	1565.6	1007
2020-02-10	1569.3	1574.7	1568.6	1574.7	1008
2020-02-07	1564.9	1571.9	1560.5	1568.6	1009
2020-02-06	1553.6	1565.6	1551.6	1565.1	1010
2020-02-05	1553.2	1560.7	1547.7	1557.8	1011
2020-02-04	1577.7	1577.7	1547.8	1550.4	1012
2020-02-03	1592.9	1593.3	1568.2	1577.2	1013
2020-01-31	1573.4	1589	1570	1582.9	1014
2020-01-30	1576.8	1585	1571.4	1583.5	1015
2020-01-29	1569.8	1569.8	1569.8		1016
2020-01-28	1576.4	1576.4	1569.2	1569.2	1017
2020-01-27	1584.3	1584.5	1576.8	1576.8	1018
2020-01-24	1556.3	1571.1	1556.3	1571.1	1019
2020-01-23	1553.1	1564.6	1552.2	1564.6	1020
2020-01-22	1549.8	1557.1	1549.8	1555.3	1021
2020-01-21	1559.3	1566.2	1551	1556.4	1022
2020-01-17	1554.1	1558.8	1553.6	1558.8	1023
2020-01-16	1555.7	1556.1	1548.5	1549	1024
2020-01-15	1548	1553.9	1545.6	1552.1	1025
2020-01-14	1546.7	1546.7	1534.9	1542.4	1026
2020-01-13	1557.4	1558	1548.4	1548.4	1027
2020-01-10	1551.2	1558.8	1545.4	1557.5	1028
2020-01-09	1555.7	1555.7	1543.3	1551.7	1029
2020-01-08	1579.7	1604.2	1552.3	1557.4	1030
2020-01-07	1558.3	1576.3	1558.3	1571.8	1031
2020-01-06	1580	1580	1560.4	1566.2	1032
2020-01-03	1530.1	1552.7	1530.1	1549.2	1033
2020-01-02	1518.1	1528.7	1518	1524.5	1034
2019-12-31	1513.8	1523.4	1513.8	1519.5	1035
2019-12-30	1512.6	1515.1	1510	1514.5	1036
2019-12-27	1513.8	1513.8	1513.8		1037
2019-12-26	1505.2	1512.3	1505	1509.3	1038
2019-12-24	1488.7	1499.1	1488.7	1499.1	1039
2019-12-23	1482.3	1482.5	1479.9		1040
2019-12-20	1476.7	1478.1	1474.7	1474.7	1041
2019-12-19	1475.9	1478.9	1473.3	1478.2	1042
2019-12-18	1472.6	1472.6	1472.6	1472.6	1043
2019-12-17	1474.1	1476.9	1474	1474.6	1044
2019-12-16	1473.8	1475.3	1473.8	1475	1045
2019-12-13	1463.1	1475.9	1463.1	1475.6	1046
2019-12-12	1475.1	1483.9	1463.7	1466.7	1047
2019-12-11	1463.1	1475.4	1463.1	1469.4	1048
2019-12-10	1460.7	1467.2	1460.7		1049
2019-12-09	1458.8	1464.2	1458.6	1459.3	1050
2019-12-06	1475	1476	1458.2	1459.1	1051
2019-12-05	1474.7	1478	1472.3	1476.9	1052
2019-12-04	1477.5	1483.4	1471.2	1474	1053
2019-12-03	1461.6	1480.4	1459.5	1478.2	1054
2019-12-02	1462.8	1464.4	1453.3	1462.3	1055
2019-11-29	1453.6	1465.6	1452.1	1465.6	1056
2019-11-27	1461.1	1461.9	1452	1453.4	1057
2019-11-26	1459.8	1459.8	1459.8	1459.8	1058
2019-11-25	1457.1	1457.1	1455.5	1456.6	1059
2019-11-22	1468.6	1468.6	1463.1	1463.1	1060
2019-11-21	1463.1	1463.1	1463.1	1463.1	1061
2019-11-20	1472.6	1474.5	1467.3	1473.3	1062
2019-11-19	1467.7	1474.3	1467.7	1473.3	1063
2019-11-18	1472	1472	1469.7		1064
2019-11-15	1469.1	1469.1	1467.3	1467.3	1065
2019-11-14	1463.8	1471.8	1463.7	1471.8	1066
2019-11-13	1456.8	1463.3	1456.8		1067
2019-11-12	1454.9	1454.9	1447.1	1452.1	1068
2019-11-11	1461	1461	1449.3	1455.5	1069
2019-11-08	1469.1	1469.1	1461.3	1461.3	1070
2019-11-07	1489.1	1489.1	1464.2	1464.2	1071
2019-11-06	1483.2	1491	1483.2	1490.2	1072
2019-11-05	1507.1	1507.1	1480.8	1480.8	1073
2019-11-04	1511.6	1511.6	1508	1508	1074
2019-10-31	1511	1511.6	1503	1508	1075
2019-10-30	1496.1	1513.1	1496.1	1511.4	1076
2019-10-29	1487.2	1495.4	1481	1493.2	1077
2019-10-28	1485.9	1487	1485.9	1487	1078
2019-10-27	1504.1	1504.1	1490		1079
2019-10-25	1501.4	1514.3	1499	1499.5	1080
2019-10-23	1490.5	1501.2	1485.9	1498.9	1081
2019-10-22	1486.4	1490.3	1486.4	1489.9	1082
2019-10-21	1483.4	1483.5	1481.7	1481.7	1083
2019-10-20	1489.9	1489.9	1481.5		1084
2019-10-17	1487.3	1489.1	1486.6	1488.2	1085
2019-10-16	1486.2	1493.2	1485.8	1492.3	1086
2019-10-15	1482	1488	1480	1488	1087
2019-10-14	1488.9	1495.4	1476.6	1477.6	1088
2019-10-13	1484.4	1493.5	1481.3	1491.7	1089
2019-10-10	1491.9	1494.9	1476.9	1482.7	1090
2019-10-09	1511.2	1511.2	1490.6	1494.8	1091
2019-10-08	1507.7	1507.7	1498.4	1506.1	1092
2019-10-07	1489.4	1506.3	1489.3	1497.2	1093
2019-10-06	1504.8	1505.8	1489.1	1497.7	1094
2019-10-03	1505.6	1508.7	1497.1	1506.2	1095
2019-10-02	1497.4	1518.2	1496.6		1096
2019-10-01	1476.6	1503.7	1474.1	1501	1097
2019-09-30	1468.7	1485.5	1458.3	1482	1098
2019-09-29	1495.9	1495.9	1463.5	1465.7	1099
2019-09-26	1504.2	1506.1	1485.6	1499.1	1100
2019-09-25	1507.5	1507.5	1507.5		1101
2019-09-24	1527.6	1527.9	1504.6	1504.6	1102
2019-09-23	1515.1	1533	1515.1	1532.1	1103
2019-09-22	1515.5	1523.7	1515.5		1104
2019-09-19	1503	1507.3	1503	1507.3	1105
2019-09-18	1496.1	1502.4	1496.1	1498.4	1106
2019-09-17	1508.9	1509.4	1489.3	1507.5	1107
2019-09-16	1497.9	1505.1	1497.9	1505.1	1108
2019-09-15	1506.6	1506.8	1496.9	1503.1	1109
2019-09-12	1490.9	1490.9	1486.9	1490.9	1110
2019-09-11	1499.5	1515.4	1498.7	1498.7	1111
2019-09-10	1491.7	1496.6	1490.2		1112
2019-09-09	1498.5	1498.5	1486.9	1490.3	1113
2019-09-08	1509	1513	1498	1502.2	1114
2019-09-05	1517.3	1526	1504.5	1506.2	1115
2019-09-04	1551	1551.1	1511.1	1515.4	1116
2019-09-03	1549	1553.2	1534.8	1550.3	1117
2019-09-02	1522.9	1547.3	1521	1545.9	1118
2019-08-29	1524.6	1530.4	1516.7	1519.1	1119
2019-08-28	1537.5	1549.3	1519.6	1526.5	1120
2019-08-27	1538.1	1538.1	1537.8	1537.8	1121
2019-08-26	1530.5	1542.1	1528.5	1541	1122
2019-08-25	1543.2	1543.3	1524.3	1526.3	1123
2019-08-22	1493.5	1527.6	1493.5	1526.6	1124
2019-08-21	1495.1	1497.3	1493.8	1497.3	1125
2019-08-20	1504.9	1505	1498.8		1126
2019-08-19	1497.5	1506.1	1497.5	1504.6	1127
2019-08-18	1507.2	1507.6	1492.9	1500.4	1128
2019-08-15	1524.6	1524.6	1504.7	1512.5	1129
2019-08-14	1519.8	1522.7	1510.6	1519.6	1130
2019-08-13	1500	1520.5	1497	1515.9	1131
2019-08-12	1510.4	1531.4	1483.7	1502.2	1132
2019-08-11	1496	1514.9	1488.1		1133
2019-08-08	1506.2	1507.5	1495.6	1496.6	1134
2019-08-07	1498.4	1508.5	1492	1497.7	1135
2019-08-06	1473.5	1509.9	1473.2	1507.3	1136
2019-08-05	1469.7	1475	1457.7	1472.4	1137
2019-08-04	1440.4	1469.7	1440.4		1138
2019-08-01	1448	1448	1432.3	1445.6	1139
2019-07-31	1411.3	1445.2	1400.9	1420.9	1140
2019-07-30	1431.3	1435.8	1411.2	1426.1	1141
2019-07-29	1426.3	1433.9	1422.1	1429.7	1142
2019-07-28	1419.6	1419.6	1419.6	1419.6	1143
2019-07-25	1422.8	1423	1418.5	1418.5	1144
2019-07-24	1413.9	1413.9	1413.9	1413.9	1145
2019-07-23	1422.8	1422.8	1422.8	1422.8	1146
2019-07-22	1418.6	1421.3	1416.3	1420.1	1147
2019-07-21	1425.3	1425.3	1424	1425.3	1148
2019-07-18	1440.5	1442	1425.1	1425.1	1149
2019-07-17	1422.3	1444.2	1419.5	1426.1	1150
2019-07-16	1404.6	1421.3	1404.6	1421.3	1151
2019-07-15	1413.6	1413.7	1405		1152
2019-07-14	1414.4	1415	1411.4		1153
2019-07-11	1405.6	1410.1	1405.6		1154
2019-07-10	1424	1424	1404.3	1404.3	1155
2019-07-09	1409.9	1410.1	1409.9	1410.1	1156
2019-07-08	1394.5	1397.5	1386.2	1397.5	1157
2019-07-07	1395.9	1397	1393.6	1397	1158
2019-07-04	1418.3	1418.3	1390.2		1159
2019-07-03	1431	1434	1413.1	1417.7	1160
2019-07-01	1391.1	1418.4	1390.8		1161
2019-06-30	1386.6	1395.8	1382.8	1385.6	1162
2019-06-27	1408.3	1422	1408.3	1409.7	1163
2019-06-26	1407	1410.8	1399.8	1408.4	1164
2019-06-25	1407.2	1413.3	1405.8	1411.6	1165
2019-06-24	1418.1	1433.3	1414.9		1166
2019-06-23	1406	1420.6	1402.1	1414.3	1167
2019-06-20	1406	1406	1390.3	1396.2	1168
2019-06-19	1381.5	1392.9	1379.5	1392.9	1169
2019-06-18	1344	1344.6	1344	1344.6	1170
2019-06-17	1349.3	1349.3	1341.6	1346.6	1171
2019-06-16	1339	1340.3	1335	1338.7	1172
2019-06-13	1345.4	1355.4	1339.3	1340.1	1173
2019-06-12	1331.6	1341.1	1331.6	1339.2	1174
2019-06-11	1326.9	1334.5	1326.9	1331.9	1175
2019-06-10	1328.4	1328.4	1319.1	1326.4	1176
2019-06-09	1335.8	1336.5	1324.1	1324.7	1177
2019-06-06	1333.1	1347.7	1329.8	1341.2	1178
2019-06-05	1330.8	1338.7	1326.2	1337.6	1179
2019-06-04	1328.9	1343.3	1326.3	1328.3	1180
2019-06-03	1324.3	1328.6	1320.8	1323.4	1181
2019-06-02	1307	1327.8	1307	1322.7	1182
2019-05-30	1287.7	1306.4	1287.5	1305.8	1183
2019-05-29	1279.4	1288.3	1273.9	1287.1	1184
2019-05-28	1280.6	1280.6	1280.6	1280.6	1185
2019-05-27	1276.5	1276.5	1276.5	1276.5	1186
2019-05-23	1283	1283	1283	1283	1187
2019-05-22	1284.8	1284.8	1284.8		1188
2019-05-21	1273.6	1273.6	1273.6	1273.6	1189
2019-05-20	1272	1272	1272		1190
2019-05-19	1276.1	1276.1	1276.1	1276.1	1191
2019-05-16	1280	1280	1274.5	1274.5	1192
2019-05-15	1285.2	1285.4	1285	1285	1193
2019-05-14	1296.9	1296.9	1296		1194
2019-05-13	1297.8	1297.8	1294.7	1294.7	1195
2019-05-12	1286.7	1300.1	1281.8	1300.1	1196
2019-05-09	1285.4	1286.5	1283.3	1285.7	1197
2019-05-08	1278.9	1285	1278.8	1283.5	1198
2019-05-07	1279.4	1279.4	1279.4	1279.4	1199
2019-05-06	1280.5	1283.5	1280.5	1283.5	1200
2019-05-05	1282.2	1282.2	1280.3	1281.7	1201
2019-05-02	1270.1	1279.2	1270.1	1279.2	1202
2019-05-01	1269.2	1270.8	1266.6	1269.7	1203
2019-04-30	1278.7	1283.3	1278.7	1281.4	1204
2019-04-29	1281.7	1283.3	1280.8		1205
2019-04-28	1284.8	1284.9	1277.1	1278.6	1206
2019-04-25	1284.9	1284.9	1284.9		1207
2019-04-24	1280.6	1280.8	1275.8	1275.8	1208
2019-04-23	1268.4	1275.5	1267.8	1275.5	1209
2019-04-22	1266.4	1269.8	1266	1269.3	1210
2019-04-21	1273.5	1273.5	1273.5	1273.5	1211
2019-04-17	1270.8	1273.6	1270.1	1271.9	1212
2019-04-16	1273.5	1273.5	1271.6	1272.2	1213
2019-04-15	1285.2	1285.2	1272.2		1214
2019-04-14	1284.8	1287.3	1282.3	1286.8	1215
2019-04-11	1293.4	1293.4	1289.2	1290.6	1216
2019-04-10	1307	1307.1	1288.6	1288.6	1217
2019-04-09	1304	1309.1	1301.5	1309.1	1218
2019-04-08	1298.5	1304.9	1298.5	1303.5	1219
2019-04-07	1292.2	1302.1	1291.8	1297.1	1220
2019-04-04	1292	1292	1283.6	1290.4	1221
2019-04-03	1290.6	1292.6	1279.5	1289	1222
2019-04-02	1291.4	1293.1	1287.5	1289.9	1223
2019-04-01	1286.3	1290.9	1284.5	1290	1224
2019-03-31	1291.8	1295.9	1285.7	1288.4	1225
2019-03-28	1289.6	1298.5	1286.1	1293	1226
2019-03-27	1308.4	1311.1	1287.7	1289.8	1227
2019-03-26	1309.9	1309.9	1309.9	1309.9	1228
2019-03-25	1315.6	1315.6	1314.3	1314.3	1229
2019-03-24	1320.7	1322.9	1320.7		1230
2019-03-21	1311.6	1311.6	1311.6	1311.6	1231
2019-03-20	1306.1	1306.1	1306.1	1306.1	1232
2019-03-19	1300.7	1300.7	1300.5	1300.5	1233
2019-03-18	1306.9	1306.9	1304.8	1305	1234
2019-03-17	1297.3	1302.2	1297.3	1300.3	1235
2019-03-14	1300.9	1304.7	1300.5	1301.8	1236
2019-03-13	1293.4	1293.4	1293.4	1293.4	1237
2019-03-12	1307.5	1307.5	1307.5	1307.5	1238
2019-03-11	1294.7	1296.3	1294.7		1239
2019-03-10	1291	1291	1288.8	1288.8	1240
2019-03-08	1292.1	1297.4	1291.6	1297	1241
2019-03-07	1281	1284.6	1281	1283.8	1242
2019-03-06	1287.1	1287.1	1282.6	1284.9	1243
2019-03-05	1287	1287	1282	1282	1244
2019-03-04	1285.5	1287	1281.9	1284.8	1245
2019-03-01	1312.2	1312.2	1288.9	1296.4	1246
2019-02-28	1321.1	1323.7	1311.5		1247
2019-02-27	1327.7	1327.9	1316.5	1317.7	1248
2019-02-26	1323.3	1325.5	1323.3	1325.1	1249
2019-02-25	1329.2	1331.6	1325.6	1325.9	1250
2019-02-22	1324.2	1331.3	1321	1329.2	1251
2019-02-21	1331.3	1334.9	1320.9		1252
2019-02-20	1342.2	1344	1338	1343.3	1253
2019-02-19	1320.9	1340.1	1320.5	1340.1	1254
2019-02-15	1313.6	1318.8	1313.6		1255
2019-02-14	1305	1311.8	1301.6	1309.8	1256
2019-02-13	1311.6	1316	1308.1		1257
2019-02-12	1310	1312	1307.6		1258
2019-02-11	1313.4	1313.4	1304.7	1307	1259
2019-02-08	1309.5	1314	1307.8	1313.7	1260
2019-02-07	1302.9	1310.4	1302.2	1309.4	1261
2019-02-06	1312.5	1313.5	1305	1309.5	1262
2019-02-05	1311.1	1315.1	1311	1314.2	1263
2019-02-04	1318.1	1318.1	1308.3	1314.3	1264
2019-02-01	1320.3	1320.7	1315.4	1316.9	1265
2019-01-31	1320	1325.4	1316.7	1319.7	1266
2019-01-30	1310.4	1323.4	1308.1	1309.9	1267
2019-01-29	1308.2	1308.2	1308.2	1308.2	1268
2019-01-28	1300.8	1307.1	1298.4	1302.4	1269
2019-01-25	1297.4	1297.4	1297.4	1297.4	1270
2019-01-24	1279.1	1279.1	1278.5	1279.1	1271
2019-01-23	1281.7	1283.9	1278.7	1283.1	1272
2019-01-22	1282.5	1283.3	1282.5	1282.5	1273
2019-01-18	1281.3	1281.3	1281.3	1281.3	1274
2019-01-17	1291.6	1292.7	1288.5	1291	1275
2019-01-16	1291.6	1291.6	1291.6	1291.6	1276
2019-01-15	1290.1	1292.7	1286.2	1286.2	1277
2019-01-14	1292.4	1293.9	1289.1		1278
2019-01-11	1291.2	1291.2	1286.3	1287.1	1279
2019-01-10	1284.7	1284.7	1284.7	1284.7	1280
2019-01-09	1279.4	1289.3	1279.2	1289.3	1281
2019-01-08	1280.5	1283.2	1278.2	1283.2	1282
2019-01-07	1286.8	1286.8	1286.6	1286.8	1283
2019-01-04	1294.2	1294.2	1275.3	1282.7	1284
2019-01-03	1286.8	1292	1286.7	1291.8	1285
2019-01-02	1286	1286	1277.6	1281	1286
2018-12-31	1278	1281.3	1277.6	1278.3	1287
2018-12-28	1273.5	1280.1	1273.5	1279.9	1288
2018-12-27	1276.7	1277.3	1276.7	1277.3	1289
2018-12-26	1269.3	1277.4	1269.2	1269.2	1290
2018-12-24	1260.3	1268.5	1260.3	1267.5	1291
2018-12-21	1260.3	1261.3	1253.8	1253.8	1292
2018-12-20	1243.2	1263.6	1243.2	1263.6	1293
2018-12-19	1255.8	1255.8	1252.1	1252.1	1294
2018-12-18	1248.2	1249.2	1245.6		1295
2018-12-17	1239.3	1247.4	1239.3	1247.4	1296
2018-12-14	1241.7	1241.7	1234.1	1237	1297
2018-12-13	1243.5	1243.5	1241	1242.7	1298
2018-12-12	1245.3	1245.6	1244.1	1244.4	1299
2018-12-11	1245.8	1248.7	1241.5	1241.9	1300
2018-12-10	1249.6	1249.6	1241.7	1243.7	1301
2018-12-07	1238.3	1249.8	1237.6	1246.8	1302
2018-12-06	1237.5	1244.4	1234.8	1238.1	1303
2018-12-04	1231	1241.4	1230.4	1241.1	1304
2018-12-03	1222.5	1234.1	1221.3	1233.9	1305
2018-11-30	1224.1	1225	1216.1		1306
2018-11-29	1221	1228.7	1220.5	1224.1	1307
2018-11-28	1211.5	1221.4	1211.5	1221.4	1308
2018-11-27	1221.9	1222	1211.2	1211.2	1309
2018-11-26	1220.2	1222	1220.2	1220.2	1310
2018-11-23	1224.8	1224.8	1221	1221	1311
2018-11-21	1225.8	1225.8	1225.8	1225.8	1312
2018-11-20	1225.3	1228.8	1219	1219	1313
2018-11-19	1223.1	1223.1	1223.1	1223.1	1314
2018-11-16	1216.7	1223.8	1216.7	1220.8	1315
2018-11-15	1212.8	1212.8	1212.8	1212.8	1316
2018-11-14	1207.9	1207.9	1207.9	1207.9	1317
2018-11-13	1196.3	1201.3	1196.3		1318
2018-11-12	1201.6	1201.6	1201.3	1201.3	1319
2018-11-09	1207.9	1207.9	1206.4	1206.4	1320
2018-11-08	1222.9	1222.9	1222.9	1222.9	1321
2018-11-07	1228.6	1228.6	1226.2	1226.2	1322
2018-11-06	1230.7	1233.8	1223.8	1223.8	1323
2018-11-05	1230.6	1231.5	1226.7	1229.8	1324
2018-11-01	1233.3	1233.3	1230.9	1230.9	1325
2018-10-31	1215.4	1236	1215.4	1236	1326
2018-10-30	1216	1216.6	1212	1212.3	1327
2018-10-29	1227.7	1227.7	1219.8	1222.6	1328
2018-10-28	1224.5	1224.5	1224.5	1224.5	1329
2018-10-26	1234.3	1234.8	1232.5	1232.5	1330
2018-10-24	1238.6	1238.6	1229.1	1229.1	1331
2018-10-23	1231.6	1231.6	1227.8	1227.8	1332
2018-10-22	1224.8	1237.8	1224.8		1333
2018-10-21	1224.5	1224.5	1219.6	1221.2	1334
2018-10-18	1225.3	1225.3	1225.3	1225.3	1335
2018-10-17	1226.5	1226.5	1226.5	1226.5	1336
2018-10-16	1225.9	1225.9	1223.7		1337
2018-10-15	1227.1	1230.5	1227.1	1227.3	1338
2018-10-14	1222.4	1232.3	1222.4	1226.4	1339
2018-10-11	1221.6	1221.6	1216	1218.1	1340
2018-10-10	1198.1	1224.6	1196.3	1223.5	1341
2018-10-09	1189.3	1192	1189.3	1189.3	1342
2018-10-08	1185.6	1189.1	1185.6	1187.2	1343
2018-10-07	1201	1201	1183.7	1184.4	1344
2018-10-04	1197.1	1205.3	1196.9	1201.2	1345
2018-10-03	1199.3	1204.6	1197.2	1197.2	1346
2018-10-02	1202.6	1202.6	1196.6	1198.3	1347
2018-10-01	1193	1206	1190.3	1202.4	1348
2018-09-30	1191.6	1191.6	1185.8	1187.1	1349
2018-09-27	1181.7	1191.9	1180	1191.5	1350
2018-09-26	1194.6	1197.3	1180.5	1182.3	1351
2018-09-25	1194	1194	1194	1194	1352
2018-09-24	1202.1	1202.8	1200	1200	1353
2018-09-23	1199.3	1199.3	1199.3	1199.3	1354
2018-09-20	1196.2	1196.2	1196.2	1196.2	1355
2018-09-19	1206.2	1206.2	1206.2	1206.2	1356
2018-09-18	1202.2	1202.2	1202.2		1357
2018-09-17	1198.7	1198.7	1196.8	1196.8	1358
2018-09-16	1199.7	1199.7	1199.7	1199.7	1359
2018-09-13	1195	1195	1195	1195	1360
2018-09-12	1203.4	1203.4	1200	1202	1361
2018-09-11	1205	1205	1204.7	1204.7	1362
2018-09-10	1190.4	1196.3	1190.4	1195.4	1363
2018-09-09	1193	1193	1193	1193	1364
2018-09-06	1198.3	1198.3	1193.1	1193.6	1365
2018-09-05	1202	1202	1197.9	1197.9	1366
2018-09-04	1192.5	1196	1192.5	1194.9	1367
2018-09-03	1193.8	1193.8	1189.9	1192.7	1368
2018-08-30	1207.1	1208.2	1199.1		1369
2018-08-29	1205.4	1205.6	1196		1370
2018-08-28	1205.2	1205.2	1202.4	1204.5	1371
2018-08-27	1209.7	1217	1202.3	1207.4	1372
2018-08-26	1210.3	1211.4	1205.2	1209	1373
2018-08-23	1185.3	1208	1185.3	1206.3	1374
2018-08-22	1189.3	1190.3	1184.9	1187	1375
2018-08-21	1194.7	1196.3	1194.7	1196.3	1376
2018-08-20	1189.8	1192.6	1189.8	1192.6	1377
2018-08-19	1184.8	1190	1184.4	1186.8	1378
2018-08-16	1174.7	1181.2	1174.7	1176.5	1379
2018-08-15	1173.2	1180.2	1161.4	1176.2	1380
2018-08-14	1187.8	1188.1	1174.6	1177.5	1381
2018-08-13	1193.1	1197.5	1192.8	1193	1382
2018-08-12	1207	1207.4	1191.3	1191.3	1383
2018-08-09	1212.5	1216.4	1205.6	1211.1	1384
2018-08-08	1214.5	1215.3	1211.6	1211.9	1385
2018-08-07	1212	1215.2	1205.9	1212.6	1386
2018-08-06	1207.8	1214.8	1207.8	1209.6	1387
2018-08-05	1214.4	1214.4	1206.6		1388
2018-08-02	1206.5	1218.6	1205.1	1214.2	1389
2018-08-01	1214.7	1219.3	1205.8	1210.6	1390
2018-07-31	1222.9	1223.7	1214.4	1217.9	1391
2018-07-30	1220.4	1228.1	1213	1223.7	1392
2018-07-29	1222.5	1223.9	1218.1	1221.3	1393
2018-07-26	1222.6	1222.6	1222.6	1222.6	1394
2018-07-25	1227.8	1227.8	1225.3	1225.3	1395
2018-07-24	1231.4	1231.4	1231.4	1231.4	1396
2018-07-23	1223.9	1223.9	1223.9	1223.9	1397
2018-07-22	1222	1224	1222	1224	1398
2018-07-19	1229.5	1229.5	1229.5	1229.5	1399
2018-07-18	1227.2	1228	1211.7	1222.4	1400
2018-07-17	1226.7	1226.7	1222.2	1226.3	1401
2018-07-16	1225.7	1225.7	1225.7	1225.7	1402
2018-07-15	1242.7	1243.8	1238.1	1238.1	1403
2018-07-12	1244.7	1247	1239.6	1239.6	1404
2018-07-11	1240.9	1246.7	1240.9	1245	1405
2018-07-10	1253.2	1253.2	1242.8	1242.8	1406
2018-07-09	1256.2	1256.9	1249.3	1253.8	1407
2018-07-08	1258.2	1262.3	1257.7	1258.1	1408
2018-07-05	1255.5	1255.5	1254.3	1254.3	1409
2018-07-04	1255.5	1257.3	1253.6	1257.3	1410
2018-07-03	1238.1	1254.1	1237	1251.6	1411
2018-07-01	1249.9	1249.9	1239.8	1239.8	1412
2018-06-28	1250.3	1253.3	1249.1	1251.3	1413
2018-06-27	1251.7	1251.7	1244.8		1414
2018-06-26	1255.5	1255.5	1252.3	1252.8	1415
2018-06-25	1267.2	1267.2	1256.6	1256.6	1416
2018-06-24	1270.6	1271.2	1265.6	1265.6	1417
2018-06-21	1268.1	1270.2	1267		1418
2018-06-20	1262.7	1268.9	1260	1267.2	1419
2018-06-19	1274.4	1274.4	1271.2	1271.2	1420
2018-06-18	1278.7	1281.8	1269.9	1275.6	1421
2018-06-17	1280.7	1280.7	1276.2	1276.2	1422
2018-06-14	1297.2	1307.7	1274	1274.6	1423
2018-06-13	1297.2	1307.7	1297.2	1304	1424
2018-06-12	1294	1299.4	1290.9	1296.9	1425
2018-06-11	1297.8	1298.1	1292.7	1295.1	1426
2018-06-10	1299.3	1302	1295.2	1298.9	1427
2018-06-07	1295.3	1299.4	1294.8	1298.1	1428
2018-06-06	1298.4	1302.8	1296.2	1298.7	1429
2018-06-05	1296.1	1300.4	1294.1	1297.1	1430
2018-06-04	1292.1	1299.8	1289.9	1297.5	1431
2018-06-03	1293.9	1297.1	1290	1293.1	1432
2018-05-31	1298.6	1299.5	1288.9	1294.8	1433
2018-05-30	1301	1306.8	1296.6	1300.1	1434
2018-05-29	1298	1303.7	1295.2	1301.5	1435
2018-05-28	1298.7	1298.7	1298.7	1298.7	1436
2018-05-24	1303.3	1303.3	1303.3	1303.3	1437
2018-05-23	1303.7	1303.7	1303.7		1438
2018-05-22	1289.3	1289.3	1289.3	1289.3	1439
2018-05-21	1291.7	1291.7	1291.7	1291.7	1440
2018-05-20	1287.4	1292.1	1287.4	1290.2	1441
2018-05-17	1285.2	1290.2	1285.2	1290.2	1442
2018-05-16	1291.3	1291.3	1288.2	1288.2	1443
2018-05-15	1290.9	1294	1285.4		1444
2018-05-14	1304.6	1304.7	1288.9	1288.9	1445
2018-05-13	1319.9	1319.9	1316.5	1316.5	1446
2018-05-10	1319	1319	1319	1319	1447
2018-05-09	1312.2	1320.8	1312.2	1320.8	1448
2018-05-08	1311.3	1311.3	1311.3		1449
2018-05-07	1310.1	1312	1308.5		1450
2018-05-06	1310.6	1312.5	1310.2	1312.2	1451
2018-05-03	1312.7	1312.7	1312.7		1452
2018-05-02	1310.7	1310.7	1310.7	1310.7	1453
2018-05-01	1309	1309.3	1302.6	1302.6	1454
2018-04-30	1313.2	1313.8	1303.4	1303.8	1455
2018-04-29	1309.6	1316.2	1309.6	1316.2	1456
2018-04-26	1315.3	1321.7	1312.8	1320.3	1457
2018-04-25	1315.7	1316.3	1315.7	1316.3	1458
2018-04-24	1324	1325	1320	1321.2	1459
2018-04-23	1326.4	1331.7	1326.2	1331.4	1460
2018-04-22	1334	1334.4	1322.5	1322.5	1461
2018-04-19	1342.5	1343.4	1335.3	1336.7	1462
2018-04-18	1348.6	1355.2	1341.6	1346.8	1463
2018-04-17	1343.5	1354.2	1343.5	1351.2	1464
2018-04-16	1348	1348.1	1339	1347.2	1465
2018-04-15	1341	1348.8	1341	1347.5	1466
2018-04-12	1335.9	1346	1335.9	1344.8	1467
2018-04-11	1351.2	1351.5	1334.6	1338.4	1468
2018-04-10	1340.1	1365.4	1340.1	1356.5	1469
2018-04-09	1335.2	1342	1333	1342	1470
2018-04-08	1333	1337.5	1327	1336.3	1471
2018-04-05	1326.5	1333	1319	1331.9	1472
2018-04-04	1333.5	1333.7	1322.6	1324.3	1473
2018-04-03	1331.8	1347.3	1331.6	1335.8	1474
2018-04-02	1340.4	1341.5	1328.5	1332.8	1475
2018-04-01	1327	1344.2	1324.7	1342.1	1476
2018-03-28	1324	1327.1	1321.7	1322.8	1477
2018-03-27	1345	1346.4	1322.4		1478
2018-03-26	1341	1341.3	1341	1341.3	1479
2018-03-25	1348.5	1354.4	1345.1	1354.4	1480
2018-03-22	1343.2	1349.3	1343.2	1349.3	1481
2018-03-21	1326.6	1326.6	1326.6		1482
2018-03-20	1312.4	1328.8	1312.4	1320.7	1483
2018-03-19	1311.1	1311.1	1311.1	1311.1	1484
2018-03-18	1309.4	1316.9	1307.3	1316.8	1485
2018-03-15	1310.1	1311.3	1310.1	1311.3	1486
2018-03-14	1316.8	1316.8	1316.8	1316.8	1487
2018-03-13	1322.2	1324.4	1322.2	1324.4	1488
2018-03-12	1325.9	1325.9	1325.3		1489
2018-03-11	1319.4	1319.4	1319.4	1319.4	1490
2018-03-09	1316.8	1322.4	1313	1322.4	1491
2018-03-08	1324.8	1326.8	1319.3	1319.9	1492
2018-03-07	1338.1	1338.1	1326	1326	1493
2018-03-06	1321.6	1333.6	1321.4	1333.6	1494
2018-03-05	1323.5	1325.9	1318.1	1318.1	1495
2018-03-02	1314.3	1323.2	1314.3	1321.1	1496
2018-03-01	1310.4	1318.1	1301.8	1302.9	1497
2018-02-28	1315.4	1321	1315.4	1315.5	1498
2018-02-27	1331.7	1332.6	1312.7	1315.5	1499
2018-02-26	1335	1340.5	1330.7	1330.7	1500
2018-02-23	1328	1332.1	1327.7	1328.2	1501
2018-02-22	1322	1331.4	1322	1330.6	1502
2018-02-21	1326.8	1331.5	1324.4	1330	1503
2018-02-20	1348.4	1350.2	1328.5		1504
2018-02-16	1354	1361.4	1344.9	1353.2	1505
2018-02-15	1352	1355.9	1349.7	1352.1	1506
2018-02-14	1332.8	1355.5	1324	1355.5	1507
2018-02-13	1324.5	1329.6	1323.4	1328.1	1508
2018-02-12	1323.8	1325.5	1318	1324.2	1509
2018-02-09	1320.9	1322	1311.9	1313.1	1510
2018-02-08	1317.1	1321.1	1307	1316.9	1511
2018-02-07	1325.4	1331.1	1310.5	1311.6	1512
2018-02-06	1338.2	1343.7	1319.5	1326.1	1513
2018-02-05	1331.1	1340.2	1329	1333	1514
2018-02-02	1348.5	1352.1	1327.7	1333.7	1515
2018-02-01	1343.8	1350.6	1336.8	1344.3	1516
2018-01-31	1337.5	1346.9	1331.8	1339	1517
2018-01-30	1338.7	1347.8	1332.8	1335.4	1518
2018-01-26	1351.6	1352	1350.9	1351.6	1519
2018-01-25	1356.3	1362.4	1346.7		1520
2018-01-24	1355.9	1357.2	1355.9	1355.9	1521
2018-01-23	1335.8	1335.9	1335.7	1335.7	1522
2018-01-22	1328.4	1330.9	1328.4	1330.9	1523
2018-01-19	1330.1	1333	1330.1	1331.9	1524
2018-01-18	1328.9	1328.9	1326	1326	1525
2018-01-17	1334.4	1338	1326.8	1338	1526
2018-01-16	1331.1	1335.4	1331	1335.4	1527
2018-01-12	1327.8	1338.2	1327.8	1333.4	1528
2018-01-11	1317.1	1320.6	1316.3	1320.6	1529
2018-01-10	1320.3	1320.7	1315.3		1530
2018-01-09	1309.6	1311.7	1309.6	1311.7	1531
2018-01-08	1319.9	1319.9	1314.6	1318.6	1532
2018-01-05	1320.3	1320.3	1320.3	1320.3	1533
2018-01-04	1319.4	1322	1319.4	1319.4	1534
2018-01-03	1320	1320.1	1312.1	1316.2	1535
2018-01-02	1302.3	1317.6	1302.3	1313.7	1536
2017-12-29	1294.2	1306.3	1294	1306.3	1537
2017-12-28	1288.2	1294.1	1288.2		1538
2017-12-27	1284	1287	1284	1287	1539
2017-12-26	1282.4	1284.1	1281.8	1284.1	1540
2017-12-22	1266.3	1276.3	1266.3	1275.4	1541
2017-12-21	1266.4	1267.4	1264.3	1267.3	1542
2017-12-20	1261.3	1266.6	1261.3	1266.1	1543
2017-12-19	1261.1	1264.3	1259.5	1260.7	1544
2017-12-18	1256.2	1262.4	1255.7	1262.2	1545
2017-12-15	1253.1	1260.3	1253.1	1254.3	1546
2017-12-14	1252.9	1257.7	1250.3	1253.8	1547
2017-12-13	1241.9	1254.5	1239.8	1245.4	1548
2017-12-12	1241.3	1244.4	1236.5	1238.5	1549
2017-12-11	1248.4	1249.2	1239.9	1243.7	1550
2017-12-08	1246.3	1249.3	1241.5	1245.2	1551
2017-12-07	1262.3	1262.4	1243.9	1249.8	1552
2017-12-06	1264.9	1267.8	1261.6	1262.8	1553
2017-12-05	1275.4	1275.8	1260	1261.6	1554
2017-12-04	1272.5	1276.1	1270.3	1274.3	1555
2017-12-01	1274.1	1288.6	1271	1278.8	1556
2017-11-30	1283.1	1284.5	1269.7	1273.2	1557
2017-11-29	1293.4	1296.2	1281.1	1282.1	1558
2017-11-28	1294.7	1294.7	1294.7	1294.7	1559
2017-11-27	1293.8	1293.8	1293.8	1293.8	1560
2017-11-24	1286.7	1286.7	1286.7	1286.7	1561
2017-11-22	1284.7	1291.6	1282.9	1291.6	1562
2017-11-21	1281.1	1281.1	1281.1	1281.1	1563
2017-11-20	1274.6	1275.9	1274.6	1274.6	1564
2017-11-17	1288.3	1295.8	1288.3	1295.8	1565
2017-11-16	1277.5	1277.5	1277.4	1277.4	1566
2017-11-15	1281.4	1284.7	1275.9	1276.5	1567
2017-11-14	1276.9	1281.5	1276.9	1281.5	1568
2017-11-13	1277.3	1277.3	1277	1277.3	1569
2017-11-10	1283.5	1283.5	1272.4	1272.4	1570
2017-11-09	1279.7	1286.9	1279.7	1285.6	1571
2017-11-08	1275.9	1284.9	1274.7	1281.6	1572
2017-11-07	1276.8	1276.8	1270.4	1273.7	1573
2017-11-06	1269	1280.5	1269	1279.4	1574
2017-11-02	1265.3	1267.9	1265.3	1266.5	1575
2017-11-01	1274.9	1274.9	1274.9	1274.9	1576
2017-10-31	1272.2	1274.8	1270.3	1274.1	1577
2017-10-30	1273.1	1274.6	1266.1		1578
2017-10-29	1270	1274.1	1267.9	1274.1	1579
2017-10-27	1268.4	1268.5	1267.1	1268.5	1580
2017-10-25	1273.5	1273.5	1264.7	1266.3	1581
2017-10-24	1269.9	1275.4	1269.9	1275.4	1582
2017-10-23	1275.5	1275.5	1273.7	1275	1583
2017-10-22	1274.7	1280.8	1271.5		1584
2017-10-19	1279.6	1279.6	1277.4	1277.4	1585
2017-10-18	1286.4	1286.9	1285.1	1286.9	1586
2017-10-17	1279.9	1279.9	1279.9	1279.9	1587
2017-10-16	1295.1	1295.1	1283	1283	1588
2017-10-15	1302	1303.8	1291.9	1299.9	1589
2017-10-12	1293.3	1301.7	1291.7	1301.5	1590
2017-10-11	1291.5	1294.5	1289.3	1293.3	1591
2017-10-10	1287.3	1292	1284.9	1285.8	1592
2017-10-09	1282.6	1293	1281.7	1290.6	1593
2017-10-08	1280.6	1284	1279	1281.8	1594
2017-10-05	1267.6	1272	1260.5		1595
2017-10-04	1277.8	1277.8	1267.6	1269.9	1596
2017-10-03	1273.8	1280.8	1270		1597
2017-10-02	1269.7	1273.3	1268.6	1271.5	1598
2017-10-01	1275	1276.1	1270.4	1272.7	1599
2017-09-28	1284.2	1289.4	1281.5	1281.5	1600
2017-09-27	1283.1	1288	1277	1285.5	1601
2017-09-26	1283.4	1283.4	1283.4		1602
2017-09-25	1304.5	1305.6	1297	1297	1603
2017-09-24	1293.1	1309.2	1291		1604
2017-09-21	1295	1295.7	1293.3	1293.3	1605
2017-09-20	1299.1	1304.1	1290.3	1290.6	1606
2017-09-19	1312	1312	1298.7		1607
2017-09-18	1307.9	1310.3	1305.1	1306.2	1608
2017-09-17	1309.8	1310.4	1306	1306.3	1609
2017-09-14	1320.6	1321.2	1319.8	1320.4	1610
2017-09-13	1319.6	1329.3	1319.6	1324.7	1611
2017-09-12	1323.4	1323.4	1323.4	1323.4	1612
2017-09-11	1327	1328	1325.2	1328	1613
2017-09-10	1331	1331	1327.3	1331	1614
2017-09-07	1351	1355.8	1345.6	1346	1615
2017-09-06	1336.4	1349	1336.4	1345.1	1616
2017-09-05	1340	1340.3	1332.6	1333.9	1617
2017-09-04	1335.2	1339.2	1328.6	1339.2	1618
2017-08-31	1320.2	1327.7	1316.9	1324.5	1619
2017-08-30	1306.6	1322.3	1301.7	1316.2	1620
2017-08-29	1308.2	1312.5	1304.9	1308.1	1621
2017-08-28	1318.8	1323.8	1313.1	1313.1	1622
2017-08-27	1293.5	1311.3	1293.5	1309.7	1623
2017-08-24	1285.4	1292.7	1280.3		1624
2017-08-23	1288.7	1288.7	1284	1286.5	1625
2017-08-22	1289.4	1289.4	1286.9	1288.9	1626
2017-08-21	1287.2	1288.4	1283.2	1285.1	1627
2017-08-20	1285.2	1290.8	1284.7	1290.8	1628
2017-08-17	1288.6	1300.7	1284.3	1285.7	1629
2017-08-16	1283.8	1288.5	1283.2	1286.4	1630
2017-08-15	1271.3	1282.6	1269.4	1276.9	1631
2017-08-14	1280.5	1280.5	1267.4	1273.7	1632
2017-08-13	1288.4	1288.4	1278.8		1633
2017-08-10	1286.3	1291.1	1282	1287.7	1634
2017-08-09	1276.6	1287.4	1274.9	1283.7	1635
2017-08-08	1260.2	1277.8	1260.2	1273	1636
2017-08-07	1256.9	1264.1	1251.4	1256.4	1637
2017-08-06	1258.7	1259.1	1255.3		1638
2017-08-03	1269	1269.6	1253.9	1258.3	1639
2017-08-02	1265.9	1269.8	1256.6	1267.8	1640
2017-08-01	1268.5	1272.1	1262.9	1271.8	1641
2017-07-31	1268.4	1273.3	1262	1272.6	1642
2017-07-30	1268.9	1270.8	1265.8	1266.6	1643
2017-07-27	1258.4	1270	1256.9	1268.4	1644
2017-07-26	1259.6	1259.6	1259.6	1259.6	1645
2017-07-25	1244.8	1249	1244.8	1249	1646
2017-07-24	1252.7	1253.6	1249.2	1251.7	1647
2017-07-23	1256	1256	1253.9	1253.9	1648
2017-07-20	1250.7	1254.3	1250.5	1254.3	1649
2017-07-19	1236.6	1244.8	1236.6	1244.8	1650
2017-07-18	1240.4	1241.2	1240.1	1241.2	1651
2017-07-17	1236.2	1241.2	1236.2	1241.1	1652
2017-07-16	1229.9	1233.4	1229.9	1232.8	1653
2017-07-13	1214.9	1227.5	1214.8		1654
2017-07-12	1221.4	1221.4	1216.3	1216.3	1655
2017-07-11	1218.3	1219.4	1217.9	1218.1	1656
2017-07-10	1208.7	1214.9	1208.7		1657
2017-07-09	1211.4	1212.1	1209.6	1212.1	1658
2017-07-06	1219.1	1220.4	1208.6	1208.6	1659
2017-07-05	1225.1	1225.1	1222.2	1222.2	1660
2017-07-04	1222.5	1225	1217.1		1661
2017-07-03	1236	1236	1217.9	1217.9	1662
2017-06-29	1243.7	1243.7	1239.1	1240.7	1663
2017-06-28	1248.2	1250.7	1238.1	1244.2	1664
2017-06-27	1248.5	1248.5	1248		1665
2017-06-26	1251.6	1251.8	1245.9	1246.4	1666
2017-06-25	1260.2	1260.2	1241.6	1246.3	1667
2017-06-22	1250	1273.6	1249.8	1256.2	1668
2017-06-21	1251	1252.7	1246.3	1247.6	1669
2017-06-20	1244.1	1245	1240	1243.4	1670
2017-06-19	1242.2	1245.5	1240.5	1241	1671
2017-06-18	1252.1	1252.2	1241.9	1244.2	1672
2017-06-15	1252.8	1255.3	1251.3	1254	1673
2017-06-14	1263.2	1264.2	1250.3	1252.2	1674
2017-06-13	1269.4	1278	1256.8		1675
2017-06-12	1264.1	1266.9	1259.7	1265.8	1676
2017-06-11	1266.4	1269.3	1263.2	1266.1	1677
2017-06-08	1277.9	1277.9	1264.6		1678
2017-06-07	1285.4	1287.6	1268.1	1276.3	1679
2017-06-06	1291.6	1293.1	1284.3		1680
2017-06-05	1279.4	1295.2	1279.4	1294.4	1681
2017-06-04	1279.2	1282	1277	1279.3	1682
2017-06-01	1265.2	1279	1259	1276.8	1683
2017-05-31	1268	1269.2	1260.8	1267	1684
2017-05-30	1262.4	1273.2	1258.5	1272	1685
2017-05-29	1267.4	1270	1258.4	1262.1	1686
2017-05-25	1267.6	1267.6	1267.6	1267.6	1687
2017-05-24	1257.1	1258.3	1255.8	1255.8	1688
2017-05-23	1251.9	1257.8	1249.7		1689
2017-05-22	1261.5	1261.6	1250.6	1254.8	1690
2017-05-21	1251.7	1260.7	1251.7	1260.7	1691
2017-05-18	1252.7	1252.7	1252.7	1252.7	1692
2017-05-17	1254.8	1260	1245.8	1251.7	1693
2017-05-16	1241	1259.2	1240.7	1257.5	1694
2017-05-15	1230.4	1237.3	1230.4	1235	1695
2017-05-14	1227.5	1232.7	1227.5		1696
2017-05-11	1228	1229.5	1226.1	1226.2	1697
2017-05-10	1218.5	1222.7	1218.3	1222.7	1698
2017-05-09	1219.8	1220.2	1217.3	1217.3	1699
2017-05-08	1226.1	1226.2	1214	1214.3	1700
2017-05-07	1224	1234	1224	1225.3	1701
2017-05-04	1227	1233.7	1224.8	1224.8	1702
2017-05-03	1239.8	1239.8	1224.2	1226.5	1703
2017-05-02	1255.1	1255.8	1238.7	1246.4	1704
2017-05-01	1256.2	1256.2	1251.2	1255.1	1705
2017-04-30	1268.7	1269.3	1253.3	1253.3	1706
2017-04-27	1265.9	1267.2	1264.7	1266.1	1707
2017-04-26	1266.7	1267.2	1262.2	1263.7	1708
2017-04-25	1266	1266	1262.1		1709
2017-04-24	1275.6	1276.9	1262.1	1265.6	1710
2017-04-23	1275	1276.4	1265	1275.8	1711
2017-04-20	1279.8	1287.4	1279.2	1287.4	1712
2017-04-19	1279.7	1281.9	1276.2	1281.9	1713
2017-04-18	1288	1288	1274	1281.4	1714
2017-04-17	1283.9	1291.7	1278.6	1291.7	1715
2017-04-16	1291.8	1294.8	1284.3	1289.4	1716
2017-04-12	1285.3	1287.6	1282	1285.9	1717
2017-04-11	1275	1285.1	1272	1275.3	1718
2017-04-10	1254.5	1273.5	1254.5	1271.2	1719
2017-04-09	1252.7	1255.2	1246.8	1251.1	1720
2017-04-06	1249.5	1269.1	1249.5		1721
2017-04-05	1256.1	1257.5	1249		1722
2017-04-04	1255.4	1255.4	1243	1245.4	1723
2017-04-03	1253.1	1260.3	1253	1255	1724
2017-04-02	1247.5	1252.4	1243.6	1250.8	1725
2017-03-30	1242.1	1248.8	1238.7	1247.3	1726
2017-03-29	1253.1	1253.6	1241.1		1727
2017-03-28	1252.2	1253.4	1252.1	1253.4	1728
2017-03-27	1255.9	1255.9	1255.3	1255.3	1729
2017-03-26	1255.8	1257.7	1253.8	1255.4	1730
2017-03-23	1248	1248.3	1247.6	1248.2	1731
2017-03-22	1246.4	1247.5	1244.8	1246.9	1732
2017-03-21	1247.9	1249.5	1247.7	1249.3	1733
2017-03-20	1226.4	1246.1	1226.4	1246.1	1734
2017-03-19	1229.3	1234.4	1229.3	1233.6	1735
2017-03-16	1227.1	1230.9	1227.1	1229.8	1736
2017-03-15	1222.2	1231.4	1222.2	1226.5	1737
2017-03-14	1198.2	1221.2	1197.7	1200.1	1738
2017-03-13	1203.1	1205.9	1196.8	1201.9	1739
2017-03-12	1206.2	1210	1202.3	1202.4	1740
2017-03-10	1196.2	1203.3	1196.2	1200.7	1741
2017-03-09	1204.5	1205.6	1202.3	1202.4	1742
2017-03-08	1212.2	1212.2	1206.7	1208.5	1743
2017-03-07	1224.3	1225.4	1213.7	1215.1	1744
2017-03-06	1235.2	1235.2	1224.5	1224.5	1745
2017-03-03	1231.7	1235.2	1222.9	1225.5	1746
2017-03-02	1247.2	1247.6	1230.7	1231.9	1747
2017-03-01	1247.8	1248.9	1236.9	1248.9	1748
2017-02-28	1253.6	1257.3	1247.2	1252.6	1749
2017-02-27	1254.7	1263.1	1250.4	1257.4	1750
2017-02-24	1250	1258.8	1250	1256.9	1751
2017-02-23	1236.1	1250.3	1236.1	1250.2	1752
2017-02-22	1236.1	1238.6	1231.8	1232	1753
2017-02-21	1237.3	1237.5	1228.1	1237.5	1754
2017-02-17	1240.7	1241.2	1234.8	1237.6	1755
2017-02-16	1234.5	1240.7	1233.2	1240	1756
2017-02-15	1225.5	1231.7	1217.3	1231.7	1757
2017-02-14	1225.9	1233.5	1222.1	1223.9	1758
2017-02-13	1230.5	1231.1	1219	1224.4	1759
2017-02-10	1227.6	1234.4	1221.5	1234.4	1760
2017-02-09	1239.4	1243.5	1226.9		1761
2017-02-08	1232.1	1243.9	1231	1237.6	1762
2017-02-07	1234.2	1236.2	1228.5		1763
2017-02-06	1221.9	1235.4	1218.5	1230	1764
2017-02-03	1214.9	1220.6	1206.2	1218.5	1765
2017-02-02	1209.7	1224.2	1208.9	1216.7	1766
2017-02-01	1211.9	1211.9	1197.9	1205.6	1767
2017-01-31	1194.9	1214.7	1193.5	1208.6	1768
2017-01-30	1191.7	1198.5	1187.1	1193.2	1769
2017-01-27	1187.9	1188.3	1187.9	1188.1	1770
2017-01-26	1199.7	1199.7	1185.6	1189.5	1771
2017-01-25	1202	1202.8	1194.9	1197.3	1772
2017-01-24	1219	1219	1207.7	1210.3	1773
2017-01-23	1212	1215	1210	1215	1774
2017-01-20	1202.8	1212.1	1202.8	1204.3	1775
2017-01-19	1200.5	1204	1195.8	1200.9	1776
2017-01-18	1213.6	1214.7	1203.1	1211.3	1777
2017-01-17	1205.5	1214.6	1200.8	1212	1778
2017-01-13	1195.7	1196	1187.7	1195.3	1779
2017-01-12	1192.7	1204.3	1192.3	1198.9	1780
2017-01-11	1187.5	1197	1176.5	1195.6	1781
2017-01-10	1184.3	1188.9	1182.3	1184.2	1782
2017-01-09	1173.9	1183.6	1173	1183.5	1783
2017-01-06	1176.5	1176.5	1171.9	1171.9	1784
2017-01-05	1172	1183.3	1171.5	1179.7	1785
2017-01-04	1156.3	1165	1156.3	1163.8	1786
2017-01-03	1155.2	1160.8	1146.5		1787
2016-12-30	1162	1162	1150	1150	1788
2016-12-29	1143.8	1158.8	1143.6	1156.4	1789
2016-12-28	1141.2	1141.2	1138	1139.4	1790
2016-12-27	1134.3	1142.2	1134.3	1137.3	1791
2016-12-23	1130.9	1132.8	1130.3	1131.9	1792
2016-12-22	1131.2	1132.8	1128.3	1128.8	1793
2016-12-21	1136.1	1136.1	1130	1131.1	1794
2016-12-20	1133.5	1133.5	1126.5	1131.5	1795
2016-12-19	1139.4	1140.7	1137.9	1140.5	1796
2016-12-16	1126.9	1140.9	1126.9	1135.3	1797
2016-12-15	1139.8	1143.3	1123.9	1127.8	1798
2016-12-14	1159.8	1164	1142	1161.3	1799
2016-12-13	1163.5	1164	1155.4	1156.7	1800
2016-12-12	1158.3	1163.9	1153	1163.5	1801
2016-12-09	1166.6	1168.8	1156	1159.4	1802
2016-12-08	1173.8	1177.8	1169.1	1169.8	1803
2016-12-07	1167.7	1178.5	1166.4	1175	1804
2016-12-06	1170.9	1174.5	1167.1	1167.6	1805
2016-12-05	1181.8	1186.7	1157	1174	1806
2016-12-02	1172.3	1177.3	1166.4	1175.1	1807
2016-12-01	1172.7	1174.6	1160	1166.9	1808
2016-11-30	1187.1	1193.3	1167.9	1170.8	1809
2016-11-29	1193.2	1194.8	1179.4	1187.9	1810
2016-11-28	1188	1190.6	1188	1190.6	1811
2016-11-25	1177	1189.3	1177	1178.2	1812
2016-11-23	1212.8	1213.8	1186.8	1189.1	1813
2016-11-22	1210.4	1211.1	1207.6	1211	1814
2016-11-21	1209.6	1209.6	1209.6	1209.6	1815
2016-11-18	1211.9	1211.9	1207.2		1816
2016-11-17	1224.6	1225	1211	1216.5	1817
2016-11-16	1229.3	1229.3	1223	1223.4	1818
2016-11-15	1224.3	1226	1222.5	1224	1819
2016-11-14	1227.8	1229.5	1210.4	1221.2	1820
2016-11-10	1274.4	1287.5	1253.3	1265.5	1821
2016-11-09	1272.2	1318.6	1270		1822
2016-11-08	1284.1	1289.4	1273.2	1273.4	1823
2016-11-07	1292	1294.5	1278.3		1824
2016-11-03	1300	1303.3	1296.7	1303.3	1825
2016-11-02	1296.4	1303.1	1287.3	1302.1	1826
2016-11-01	1288.3	1307	1288.3	1306.8	1827
2016-10-31	1279.3	1290.7	1279		1828
2016-10-30	1276.6	1276.6	1271.5	1271.5	1829
2016-10-28	1270.3	1281.5	1262	1275.5	1830
2016-10-26	1269.4	1269.4	1267.9	1267.9	1831
2016-10-25	1274	1274	1264.8	1264.8	1832
2016-10-24	1264.1	1274.1	1264.1	1271.9	1833
2016-10-23	1269.2	1269.2	1261.8	1262	1834
2016-10-20	1265.9	1265.9	1265.9	1265.9	1835
2016-10-19	1270	1270.5	1265.5	1265.6	1836
2016-10-18	1262.9	1271.5	1262.9	1267.9	1837
2016-10-17	1260.9	1261.7	1260.8	1260.8	1838
2016-10-16	1249.9	1255	1249.9	1254.4	1839
2016-10-13	1253.9	1253.9	1250.6	1253.1	1840
2016-10-12	1258.7	1259	1255	1255	1841
2016-10-11	1251.7	1254	1251.1	1251.1	1842
2016-10-10	1258.9	1258.9	1253	1253	1843
2016-10-06	1253.9	1263.6	1248.9	1248.9	1844
2016-10-05	1265.3	1265.3	1249.8	1249.8	1845
2016-10-04	1272.1	1274	1261.3	1265.2	1846
2016-10-03	1307.6	1310.2	1266.3	1266.3	1847
2016-10-02	1313.5	1316.8	1308.2	1309	1848
2016-09-29	1320.6	1327.7	1312.9	1313.3	1849
2016-09-28	1321.2	1325	1314.7	1321.7	1850
2016-09-27	1319.4	1319.4	1319.4	1319.4	1851
2016-09-26	1328	1328.7	1325.9		1852
2016-09-25	1335.2	1341.8	1335.2	1339.7	1853
2016-09-22	1337.2	1337.2	1337.2	1337.2	1854
2016-09-21	1338.6	1340.4	1338.2	1340.4	1855
2016-09-20	1326.3	1326.9	1324	1326.9	1856
2016-09-19	1313.7	1313.7	1313.7		1857
2016-09-18	1313.5	1313.5	1313.5	1313.5	1858
2016-09-15	1312.2	1312.6	1305.8		1859
2016-09-14	1320.7	1320.7	1310.8	1313.5	1860
2016-09-13	1319.2	1322.3	1319.2	1321.5	1861
2016-09-12	1324.6	1324.6	1315	1319	1862
2016-09-11	1327	1329.3	1319.9	1321	1863
2016-09-08	1338.5	1338.5	1328	1330.1	1864
2016-09-07	1344.8	1345.4	1335.7	1336.8	1865
2016-09-06	1348.4	1350.5	1343.9	1344.3	1866
2016-09-05	1323.3	1349.4	1323.2		1867
2016-09-01	1309.6	1326.7	1309.2	1322.1	1868
2016-08-31	1305.3	1313.1	1301.5	1312.2	1869
2016-08-30	1310.3	1313.7	1306.3		1870
2016-08-29	1322	1322.1	1308	1311.7	1871
2016-08-28	1315	1323	1315	1322.9	1872
2016-08-25	1323.8	1340.5	1320.1		1873
2016-08-24	1321.4	1324	1317	1320.1	1874
2016-08-23	1337.2	1337.2	1322.9	1324.4	1875
2016-08-22	1337	1341.2	1334.3	1340.6	1876
2016-08-21	1334.4	1337.7	1333.3	1337.7	1877
2016-08-18	1350.1	1350.1	1338.6	1340.4	1878
2016-08-17	1351.3	1354.4	1348.2	1351.2	1879
2016-08-16	1345.5	1347.3	1338.6		1880
2016-08-15	1342.2	1355	1341	1350.5	1881
2016-08-14	1336.5	1340.6	1333.6	1340.3	1882
2016-08-11	1336.8	1351.8	1333.2	1335.8	1883
2016-08-10	1341.6	1350.4	1334.8	1342.5	1884
2016-08-09	1344.8	1354.2	1344.3	1344.3	1885
2016-08-08	1331.8	1339.4	1328.5	1339	1886
2016-08-07	1330	1335.4	1327.8	1333.4	1887
2016-08-04	1357.6	1360.8	1333.7	1336.4	1888
2016-08-03	1354.4	1361.6	1347	1358.8	1889
2016-08-02	1362.4	1364.7	1353.3	1356.1	1890
2016-08-01	1352.1	1366	1346.6	1364.4	1891
2016-07-31	1348.8	1353.5	1345.6	1351.4	1892
2016-07-28	1333.2	1353.3	1325.8	1349	1893
2016-07-27	1339.5	1344.3	1330.1	1332.3	1894
2016-07-26	1326	1326.6	1326	1326.6	1895
2016-07-25	1315.2	1320.7	1315.2	1320.7	1896
2016-07-24	1315.7	1319.3	1313.8		1897
2016-07-21	1330.7	1330.7	1320.4	1323.1	1898
2016-07-20	1312.8	1330.5	1312.8	1330.5	1899
2016-07-19	1331	1337.5	1315.5	1318.8	1900
2016-07-18	1328.5	1333.2	1326.4	1331.5	1901
2016-07-17	1327.5	1335	1326.2	1328.4	1902
2016-07-14	1333.7	1333.7	1322.9	1326.5	1903
2016-07-13	1341.4	1341.4	1322.7	1331.3	1904
2016-07-12	1341.5	1342.4	1336.7	1342.4	1905
2016-07-11	1353.6	1356	1330.3	1334.1	1906
2016-07-10	1371.7	1371.8	1353	1355	1907
2016-07-07	1361.3	1365.8	1335	1356.6	1908
2016-07-06	1366.8	1368.6	1350.5	1360.1	1909
2016-07-05	1359	1374.9	1359	1364.9	1910
2016-07-04	1342.2	1356.8	1339.7	1356.4	1911
2016-06-30	1324.5	1344.2	1321.9	1336.7	1912
2016-06-29	1315.8	1323.5	1314.5	1318.4	1913
2016-06-28	1311.6	1327.4	1311.6	1323.9	1914
2016-06-27	1314.8	1315.6	1314.1	1315.3	1915
2016-06-26	1330	1331.7	1320	1322.5	1916
2016-06-23	1253.7	1355.6	1253.7	1320	1917
2016-06-22	1263.4	1270.5	1255.2		1918
2016-06-21	1267	1269.2	1264.9	1268	1919
2016-06-20	1293.9	1293.9	1266.3	1270.5	1920
2016-06-19	1288.9	1291.2	1280.3	1290	1921
2016-06-16	1280.3	1300.1	1280.3	1292.5	1922
2016-06-15	1296.3	1316.4	1281.1	1296.1	1923
2016-06-14	1284.6	1296.2	1278.8		1924
2016-06-13	1281.8	1289.7	1277.8	1285.6	1925
2016-06-12	1276.2	1287.3	1273	1284.4	1926
2016-06-09	1267.6	1278	1265.3	1273.4	1927
2016-06-08	1262.5	1271.4	1258.1	1270.2	1928
2016-06-07	1247.6	1264	1247.3		1929
2016-06-06	1244	1244.9	1236.5	1244.4	1930
2016-06-05	1244.4	1247.3	1240	1244.6	1931
2016-06-02	1209.1	1244.5	1206.4	1240.1	1932
2016-06-01	1212.4	1217	1209.6	1209.8	1933
2016-05-31	1215.7	1219.8	1205.4	1211.9	1934
2016-05-30	1212.5	1217.6	1199	1214.8	1935
2016-05-26	1220.3	1223.2	1206.4	1213.8	1936
2016-05-25	1232.6	1232.6	1220.1	1220.1	1937
2016-05-24	1219.3	1223.5	1218.6	1223.5	1938
2016-05-23	1240	1240	1228.2		1939
2016-05-22	1251.6	1251.6	1247.5	1251.1	1940
2016-05-19	1256.6	1256.6	1252.4	1252.4	1941
2016-05-18	1248	1255.5	1247.5	1254.2	1942
2016-05-17	1276.4	1276.4	1256.8	1273.7	1943
2016-05-16	1272.5	1281.6	1270.8		1944
2016-05-15	1272.8	1287.8	1272.8	1273.4	1945
2016-05-12	1271.4	1275.7	1264.6	1271.9	1946
2016-05-11	1267	1281.2	1264	1270.3	1947
2016-05-10	1266.9	1279.2	1266.9	1274.6	1948
2016-05-09	1265.1	1267.4	1258.7	1263.9	1949
2016-05-08	1286.5	1286.5	1262.3	1265.6	1950
2016-05-05	1278.6	1295.6	1276.9	1292.9	1951
2016-05-04	1282.9	1286	1270.8	1271.4	1952
2016-05-03	1286.9	1290	1273	1273.3	1953
2016-05-02	1292.7	1301.5	1284.5	1290.7	1954
2016-05-01	1292.1	1304.4	1290.4	1294.7	1955
2016-04-28	1267.3	1295.5	1267.2	1289.2	1956
2016-04-27	1245.9	1270.1	1238.5		1957
2016-04-26	1248.6	1249.5	1248.6	1249.2	1958
2016-04-25	1239.8	1244.2	1233	1242.2	1959
2016-04-24	1231.6	1240.9	1231.6	1238.9	1960
2016-04-21	1248.5	1248.5	1228		1961
2016-04-20	1247.7	1270.6	1247.6	1249	1962
2016-04-19	1256.1	1256.1	1243	1253.2	1963
2016-04-18	1231.6	1256.2	1228.8	1253	1964
2016-04-17	1238.7	1241.1	1232.2	1233.6	1965
2016-04-14	1225.7	1235	1225.7	1233.1	1966
2016-04-13	1231.4	1243.7	1224.5	1225	1967
2016-04-12	1256.5	1256.9	1241.3	1246.8	1968
2016-04-11	1260	1261.7	1253.7	1259.4	1969
2016-04-10	1241.5	1258.7	1241.5	1256.7	1970
2016-04-07	1241	1242.8	1232	1242.5	1971
2016-04-06	1224.8	1242.9	1224.6	1236.2	1972
2016-04-05	1230.4	1230.4	1217.6	1222.5	1973
2016-04-04	1215.4	1236.7	1215.4	1228.4	1974
2016-04-03	1221.7	1222.3	1215	1218	1975
2016-03-31	1232.3	1235.2	1209.2	1222.2	1976
2016-03-30	1225.6	1239.6	1224.5	1234.2	1977
2016-03-29	1241.4	1245	1223.4	1226.9	1978
2016-03-28	1217.8	1235.6	1217.7		1979
2016-03-27	1211.5	1222.2	1210		1980
2016-03-23	1214.2	1221.4	1214.2	1221.4	1981
2016-03-22	1247.7	1247.7	1218.6	1223.7	1982
2016-03-21	1244	1252.4	1243.8	1248.2	1983
2016-03-20	1256.2	1256.2	1243.4	1243.8	1984
2016-03-17	1257.1	1264.4	1251.5	1253.8	1985
2016-03-16	1261.5	1270.1	1255.9	1264.5	1986
2016-03-15	1229.5	1263.8	1228.9	1229.3	1987
2016-03-14	1228.3	1236	1228	1230.4	1988
2016-03-13	1256	1258	1234.5		1989
2016-03-11	1270	1280.7	1249.4	1258.7	1990
2016-03-10	1250	1273	1237.5	1272	1991
2016-03-09	1254.5	1260	1244.8	1256.6	1992
2016-03-08	1268.7	1276.3	1261	1262.1	1993
2016-03-07	1259.8	1272.3	1259.7	1263.2	1994
2016-03-04	1263	1279.9	1250.9	1269.9	1995
2016-03-03	1238.4	1267.9	1238	1257.4	1996
2016-03-02	1232.8	1242.6	1226	1241.1	1997
2016-03-01	1240.5	1248.4	1229		1998
2016-02-29	1218.6	1241	1218.6	1233.9	1999
[truncated: 3,883 more rows]
[truncated: 7 more columns]
