# Supplementary material for: Multiple imputation methods: a case study of daily gold price
Source: PeerJ Comput Sci. 2024 Sep 25;10:e2337. doi: 10.7717/peerj-cs.2337 (PMC11639230; doi:10.7717/peerj-cs.2337)
Supplement: Supplemental Information 10 [file peerj-cs-10-2337-s010.xlsx]

## Sheet: 10%
Num	Date	Original	Mean	Hot&Deck	KNN	Random Forest	Spline	SVM		diff1-mean	abs diff2-mean	diff1-hot	abs diff2-hot	diff1-knn	abs diff2-knn	diff1-random	abs diff2-random	diff1-spline	abs diff2-spline	diff1-svm	abs diff2-svm		diff3-mean	diff3-hot	diff3-knn	diff3-random	diff3-spline	diff3-svm		diff4-mean	diff4-hot	diff4-knn	diff4-random	diff4-spline	diff4-svm		diff5-mean	diff5-hot	diff5-knn	diff5-random	diff5-spline	diff5-svm
1	2024-02-07	2035.2	2035.2	2035.2	2035.2	2035.2	2035.2	2035.2		0	0	0	0	0	0	0	0	0	0	0	0		0	0	0	0	0	0		0	0	0	0	0	0		0	0	0	0	0	0
2	2024-02-06	2034.5	2034.5	2034.5	2034.5	2034.5	2034.5	2034.5		0	0	0	0	0	0	0	0	0	0	0	0		0	0	0	0	0	0		0	0	0	0	0	0		0	0	0	0	0	0
3	2024-02-05	2025.7	2025.7	2025.7	2025.7	2025.7	2025.7	2025.7		0	0	0	0	0	0	0	0	0	0	0	0		0	0	0	0	0	0		0	0	0	0	0	0		0	0	0	0	0	0
4	2024-02-02	2036.1	1109.887	2019.917	2045.567	2037.069	2046.175	1208.179		-926.213	926.213	-16.183	16.183	9.467	9.467	0.969	0.969	10.075	10.075	-827.921	827.921		857871	261.889	89.6241	0.938961	101.506	685453		0.454896	0.00794804	-0.00464958	-0.00047591	-0.00494819	0.406621		0.454896	0.00794804	0.00464958	0.00047591	0.00494819	0.406621
5	2024-02-01	2053	2053.0	2053.0	2053.0	2053.0	2053.0	2053.0		0	0	0	0	0	0	0	0	0	0	0	0		0	0	0	0	0	0		0	0	0	0	0	0		0	0	0	0	0	0
6	2024-01-31	2048.4	2048.4	2048.4	2048.4	2048.4	2048.4	2048.4		0	0	0	0	0	0	0	0	0	0	0	0		0	0	0	0	0	0		0	0	0	0	0	0		0	0	0	0	0	0
7	2024-01-30	2031.5	2031.5	2031.5	2031.5	2031.5	2031.5	2031.5		0	0	0	0	0	0	0	0	0	0	0	0		0	0	0	0	0	0		0	0	0	0	0	0		0	0	0	0	0	0
8	2024-01-29	2025.2	2025.2	2025.2	2025.2	2025.2	2025.2	2025.2		0	0	0	0	0	0	0	0	0	0	0	0		0	0	0	0	0	0		0	0	0	0	0	0		0	0	0	0	0	0
9	2024-01-26	2016.8	2016.8	2016.8	2016.8	2016.8	2016.8	2016.8		0	0	0	0	0	0	0	0	0	0	0	0		0	0	0	0	0	0		0	0	0	0	0	0		0	0	0	0	0	0
10	2024-01-25	2016.9	2016.9	2016.9	2016.9	2016.9	2016.9	2016.9		0	0	0	0	0	0	0	0	0	0	0	0		0	0	0	0	0	0		0	0	0	0	0	0		0	0	0	0	0	0
11	2024-01-24	2013.9	1109.887	2030.156	2025.333	2021.030	2017.867	1208.366		-904.013	904.013	16.256	16.256	11.433	11.433	7.13	7.13	3.967	3.967	-805.534	805.534		817240	264.258	130.713	50.8369	15.7371	648885		0.448887	-0.0080719	-0.00567704	-0.00354039	-0.00196981	0.399987		0.448887	0.0080719	0.00567704	0.00354039	0.00196981	0.399987
12	2024-01-23	2023.7	1109.887	2030.156	2025.967	2024.633	2018.833	1208.349		-913.813	913.813	6.456	6.456	2.267	2.267	0.933	0.933	-4.867	4.867	-815.351	815.351		835054	41.6799	5.13929	0.870489	23.6877	664797		0.451556	-0.0031902	-0.00112023	-0.000461037	0.002405	0.402901		0.451556	0.0031902	0.00112023	0.000461037	0.002405	0.402901
13	2024-01-22	2019.8	2019.8	2019.8	2019.8	2019.8	2019.8	2019.8		0	0	0	0	0	0	0	0	0	0	0	0		0	0	0	0	0	0		0	0	0	0	0	0		0	0	0	0	0	0
14	2024-01-19	2026.5	2026.5	2026.5	2026.5	2026.5	2026.5	2026.5		0	0	0	0	0	0	0	0	0	0	0	0		0	0	0	0	0	0		0	0	0	0	0	0		0	0	0	0	0	0
15	2024-01-18	2018.6	2018.6	2018.6	2018.6	2018.6	2018.6	2018.6		0	0	0	0	0	0	0	0	0	0	0	0		0	0	0	0	0	0		0	0	0	0	0	0		0	0	0	0	0	0
16	2024-01-17	2002.6	2002.6	2002.6	2002.6	2002.6	2002.6	2002.6		0	0	0	0	0	0	0	0	0	0	0	0		0	0	0	0	0	0		0	0	0	0	0	0		0	0	0	0	0	0
17	2024-01-16	2026	1109.887	2019.917	2046.067	2035.826	2011.420	1208.208		-916.113	916.113	-6.083	6.083	20.067	20.067	9.826	9.826	-14.58	14.58	-817.792	817.792		839263	37.0029	402.684	96.5503	212.576	668784		0.452178	0.00300247	-0.00990474	-0.00484995	0.00719645	0.403649		0.452178	0.00300247	0.00990474	0.00484995	0.00719645	0.403649
18	2024-01-15	2054.8	1109.887	2039.850	2052.567	2050.743	2020.240	1208.077		-944.913	944.913	-14.95	14.95	-2.233	2.233	-4.057	4.057	-34.56	34.56	-846.723	846.723		892861	223.503	4.98629	16.4592	1194.39	716940		0.459856	0.00727565	0.00108672	0.0019744	0.0168192	0.412071		0.459856	0.00727565	0.00108672	0.0019744	0.0168192	0.412071
19	2024-01-12	2046.7	2046.7	2046.7	2046.7	2046.7	2046.7	2046.7		0	0	0	0	0	0	0	0	0	0	0	0		0	0	0	0	0	0		0	0	0	0	0	0		0	0	0	0	0	0
20	2024-01-11	2014.3	2014.3	2014.3	2014.3	2014.3	2014.3	2014.3		0	0	0	0	0	0	0	0	0	0	0	0		0	0	0	0	0	0		0	0	0	0	0	0		0	0	0	0	0	0
21	2024-01-10	2021.7	2021.7	2021.7	2021.7	2021.7	2021.7	2021.7		0	0	0	0	0	0	0	0	0	0	0	0		0	0	0	0	0	0		0	0	0	0	0	0		0	0	0	0	0	0
22	2024-01-09	2026.4	2026.4	2026.4	2026.4	2026.4	2026.4	2026.4		0	0	0	0	0	0	0	0	0	0	0	0		0	0	0	0	0	0		0	0	0	0	0	0		0	0	0	0	0	0
23	2024-01-08	2026.6	2026.6	2026.6	2026.6	2026.6	2026.6	2026.6		0	0	0	0	0	0	0	0	0	0	0	0		0	0	0	0	0	0		0	0	0	0	0	0		0	0	0	0	0	0
24	2024-01-05	2042.4	2042.4	2042.4	2042.4	2042.4	2042.4	2042.4		0	0	0	0	0	0	0	0	0	0	0	0		0	0	0	0	0	0		0	0	0	0	0	0		0	0	0	0	0	0
25	2024-01-04	2042.3	2042.3	2042.3	2042.3	2042.3	2042.3	2042.3		0	0	0	0	0	0	0	0	0	0	0	0		0	0	0	0	0	0		0	0	0	0	0	0		0	0	0	0	0	0
26	2024-01-03	2034.2	2034.2	2034.2	2034.2	2034.2	2034.2	2034.2		0	0	0	0	0	0	0	0	0	0	0	0		0	0	0	0	0	0		0	0	0	0	0	0		0	0	0	0	0	0
27	2024-01-02	2064.4	2064.4	2064.4	2064.4	2064.4	2064.4	2064.4		0	0	0	0	0	0	0	0	0	0	0	0		0	0	0	0	0	0		0	0	0	0	0	0		0	0	0	0	0	0
28	2023-12-29	2062.4	2062.4	2062.4	2062.4	2062.4	2062.4	2062.4		0	0	0	0	0	0	0	0	0	0	0	0		0	0	0	0	0	0		0	0	0	0	0	0		0	0	0	0	0	0
29	2023-12-28	2073.9	2073.9	2073.9	2073.9	2073.9	2073.9	2073.9		0	0	0	0	0	0	0	0	0	0	0	0		0	0	0	0	0	0		0	0	0	0	0	0		0	0	0	0	0	0
30	2023-12-27	2081.9	2081.9	2081.9	2081.9	2081.9	2081.9	2081.9		0	0	0	0	0	0	0	0	0	0	0	0		0	0	0	0	0	0		0	0	0	0	0	0		0	0	0	0	0	0
31	2023-12-26	2058.2	2058.2	2058.2	2058.2	2058.2	2058.2	2058.2		0	0	0	0	0	0	0	0	0	0	0	0		0	0	0	0	0	0		0	0	0	0	0	0		0	0	0	0	0	0
32	2023-12-22	2057.1	2057.1	2057.1	2057.1	2057.1	2057.1	2057.1		0	0	0	0	0	0	0	0	0	0	0	0		0	0	0	0	0	0		0	0	0	0	0	0		0	0	0	0	0	0
33	2023-12-21	2039.1	2039.1	2039.1	2039.1	2039.1	2039.1	2039.1		0	0	0	0	0	0	0	0	0	0	0	0		0	0	0	0	0	0		0	0	0	0	0	0		0	0	0	0	0	0
34	2023-12-20	2034.5	2034.5	2034.5	2034.5	2034.5	2034.5	2034.5		0	0	0	0	0	0	0	0	0	0	0	0		0	0	0	0	0	0		0	0	0	0	0	0		0	0	0	0	0	0
35	2023-12-19	2038.4	2038.4	2038.4	2038.4	2038.4	2038.4	2038.4		0	0	0	0	0	0	0	0	0	0	0	0		0	0	0	0	0	0		0	0	0	0	0	0		0	0	0	0	0	0
36	2023-12-18	2026.3	2026.3	2026.3	2026.3	2026.3	2026.3	2026.3		0	0	0	0	0	0	0	0	0	0	0	0		0	0	0	0	0	0		0	0	0	0	0	0		0	0	0	0	0	0
37	2023-12-15	2021.1	1109.887	2019.917	2021.6	2026.755	2029.225	1208.338		-911.213	911.213	-1.183	1.183	0.5	0.5	5.655	5.655	8.125	8.125	-812.762	812.762		830309	1.39949	0.25	31.979	66.0156	660582		0.45085	0.000585325	-0.00024739	-0.00279798	-0.00402009	0.402138		0.45085	0.000585325	0.00024739	0.00279798	0.00402009	0.402138
38	2023-12-14	2030.2	2030.2	2030.2	2030.2	2030.2	2030.2	2030.2		0	0	0	0	0	0	0	0	0	0	0	0		0	0	0	0	0	0		0	0	0	0	0	0		0	0	0	0	0	0
39	2023-12-13	1982.3	1982.3	1982.3	1982.3	1982.3	1982.3	1982.3		0	0	0	0	0	0	0	0	0	0	0	0		0	0	0	0	0	0		0	0	0	0	0	0		0	0	0	0	0	0
40	2023-12-12	1977.8	1977.8	1977.8	1977.8	1977.8	1977.8	1977.8		0	0	0	0	0	0	0	0	0	0	0	0		0	0	0	0	0	0		0	0	0	0	0	0		0	0	0	0	0	0
41	2023-12-11	1978	1109.887	1992.178	1996.267	1994.039	1982.925	1208.140		-868.113	868.113	14.178	14.178	18.267	18.267	16.039	16.039	4.925	4.925	-769.86	769.86		753620	201.016	333.683	257.25	24.2556	592684		0.438884	-0.00716785	-0.00923509	-0.0081087	-0.00248989	0.389211		0.438884	0.00716785	0.00923509	0.0081087	0.00248989	0.389211
42	2023-12-08	1998.3	1998.3	1998.3	1998.3	1998.3	1998.3	1998.3		0	0	0	0	0	0	0	0	0	0	0	0		0	0	0	0	0	0		0	0	0	0	0	0		0	0	0	0	0	0
43	2023-12-07	2029.9	2029.9	2029.9	2029.9	2029.9	2029.9	2029.9		0	0	0	0	0	0	0	0	0	0	0	0		0	0	0	0	0	0		0	0	0	0	0	0		0	0	0	0	0	0
44	2023-12-06	2030.5	2030.5	2030.5	2030.5	2030.5	2030.5	2030.5		0	0	0	0	0	0	0	0	0	0	0	0		0	0	0	0	0	0		0	0	0	0	0	0		0	0	0	0	0	0
45	2023-12-05	2018.5	2018.5	2018.5	2018.5	2018.5	2018.5	2018.5		0	0	0	0	0	0	0	0	0	0	0	0		0	0	0	0	0	0		0	0	0	0	0	0		0	0	0	0	0	0
46	2023-12-04	2024.1	2024.1	2024.1	2024.1	2024.1	2024.1	2024.1		0	0	0	0	0	0	0	0	0	0	0	0		0	0	0	0	0	0		0	0	0	0	0	0		0	0	0	0	0	0
47	2023-12-01	2071	2071.0	2071.0	2071.0	2071.0	2071.0	2071.0		0	0	0	0	0	0	0	0	0	0	0	0		0	0	0	0	0	0		0	0	0	0	0	0		0	0	0	0	0	0
48	2023-11-30	2038.1	2038.1	2038.1	2038.1	2038.1	2038.1	2038.1		0	0	0	0	0	0	0	0	0	0	0	0		0	0	0	0	0	0		0	0	0	0	0	0		0	0	0	0	0	0
49	2023-11-29	2047.1	2047.1	2047.1	2047.1	2047.1	2047.1	2047.1		0	0	0	0	0	0	0	0	0	0	0	0		0	0	0	0	0	0		0	0	0	0	0	0		0	0	0	0	0	0
50	2023-11-28	2039.7	2039.7	2039.7	2039.7	2039.7	2039.7	2039.7		0	0	0	0	0	0	0	0	0	0	0	0		0	0	0	0	0	0		0	0	0	0	0	0		0	0	0	0	0	0
51	2023-11-27	2011.8	2011.8	2011.8	2011.8	2011.8	2011.8	2011.8		0	0	0	0	0	0	0	0	0	0	0	0		0	0	0	0	0	0		0	0	0	0	0	0		0	0	0	0	0	0
52	2023-11-24	2002.2	2002.2	2002.2	2002.2	2002.2	2002.2	2002.2		0	0	0	0	0	0	0	0	0	0	0	0		0	0	0	0	0	0		0	0	0	0	0	0		0	0	0	0	0	0
53	2023-11-23	1991.5	1991.5	1991.5	1991.5	1991.5	1991.5	1991.5		0	0	0	0	0	0	0	0	0	0	0	0		0	0	0	0	0	0		0	0	0	0	0	0		0	0	0	0	0	0
54	2023-11-22	1991.4	1991.4	1991.4	1991.4	1991.4	1991.4	1991.4		0	0	0	0	0	0	0	0	0	0	0	0		0	0	0	0	0	0		0	0	0	0	0	0		0	0	0	0	0	0
55	2023-11-21	1999.3	1999.3	1999.3	1999.3	1999.3	1999.3	1999.3		0	0	0	0	0	0	0	0	0	0	0	0		0	0	0	0	0	0		0	0	0	0	0	0		0	0	0	0	0	0
56	2023-11-20	1977.7	1977.7	1977.7	1977.7	1977.7	1977.7	1977.7		0	0	0	0	0	0	0	0	0	0	0	0		0	0	0	0	0	0		0	0	0	0	0	0		0	0	0	0	0	0
57	2023-11-17	1981.6	1981.6	1981.6	1981.6	1981.6	1981.6	1981.6		0	0	0	0	0	0	0	0	0	0	0	0		0	0	0	0	0	0		0	0	0	0	0	0		0	0	0	0	0	0
58	2023-11-16	1983.9	1983.9	1983.9	1983.9	1983.9	1983.9	1983.9		0	0	0	0	0	0	0	0	0	0	0	0		0	0	0	0	0	0		0	0	0	0	0	0		0	0	0	0	0	0
59	2023-11-15	1960.1	1109.887	1960.092	1962.067	1960.318	1972.850	1207.310		-850.213	850.213	-0.008	0.008	1.967	1.967	0.218	0.218	12.75	12.75	-752.79	752.79		722862	6.4e-05	3.86909	0.047524	162.562	566693		0.43376	4.08142e-06	-0.00100352	-0.000111219	-0.00650477	0.384057		0.43376	4.08142e-06	0.00100352	0.000111219	0.00650477	0.384057
60	2023-11-14	1961.8	1961.8	1961.8	1961.8	1961.8	1961.8	1961.8		0	0	0	0	0	0	0	0	0	0	0	0		0	0	0	0	0	0		0	0	0	0	0	0		0	0	0	0	0	0
61	2023-11-13	1945.5	1945.5	1945.5	1945.5	1945.5	1945.5	1945.5		0	0	0	0	0	0	0	0	0	0	0	0		0	0	0	0	0	0		0	0	0	0	0	0		0	0	0	0	0	0
62	2023-11-10	1932.6	1932.6	1932.6	1932.6	1932.6	1932.6	1932.6		0	0	0	0	0	0	0	0	0	0	0	0		0	0	0	0	0	0		0	0	0	0	0	0		0	0	0	0	0	0
63	2023-11-09	1964.2	1964.2	1964.2	1964.2	1964.2	1964.2	1964.2		0	0	0	0	0	0	0	0	0	0	0	0		0	0	0	0	0	0		0	0	0	0	0	0		0	0	0	0	0	0
64	2023-11-08	1951.5	1951.5	1951.5	1951.5	1951.5	1951.5	1951.5		0	0	0	0	0	0	0	0	0	0	0	0		0	0	0	0	0	0		0	0	0	0	0	0		0	0	0	0	0	0
65	2023-11-07	1966.8	1966.8	1966.8	1966.8	1966.8	1966.8	1966.8		0	0	0	0	0	0	0	0	0	0	0	0		0	0	0	0	0	0		0	0	0	0	0	0		0	0	0	0	0	0
66	2023-11-06	1981.6	1981.6	1981.6	1981.6	1981.6	1981.6	1981.6		0	0	0	0	0	0	0	0	0	0	0	0		0	0	0	0	0	0		0	0	0	0	0	0		0	0	0	0	0	0
67	2023-11-02	1991.5	1991.5	1991.5	1991.5	1991.5	1991.5	1991.5		0	0	0	0	0	0	0	0	0	0	0	0		0	0	0	0	0	0		0	0	0	0	0	0		0	0	0	0	0	0
68	2023-11-01	1985.6	1985.6	1985.6	1985.6	1985.6	1985.6	1985.6		0	0	0	0	0	0	0	0	0	0	0	0		0	0	0	0	0	0		0	0	0	0	0	0		0	0	0	0	0	0
69	2023-10-31	1978.8	1978.8	1978.8	1978.8	1978.8	1978.8	1978.8		0	0	0	0	0	0	0	0	0	0	0	0		0	0	0	0	0	0		0	0	0	0	0	0		0	0	0	0	0	0
70	2023-10-30	1985.2	1109.887	1992.178	1989.6	1993.633	1987.5	1208.133		-875.313	875.313	6.978	6.978	4.4	4.4	8.433	8.433	2.3	2.3	-777.067	777.067		766173	48.6925	19.36	71.1155	5.29	603833		0.440919	-0.00351501	-0.0022164	-0.00424793	-0.00115857	0.39143		0.440919	0.00351501	0.0022164	0.00424793	0.00115857	0.39143
71	2023-10-29	1996.2	1996.2	1996.2	1996.2	1996.2	1996.2	1996.2		0	0	0	0	0	0	0	0	0	0	0	0		0	0	0	0	0	0		0	0	0	0	0	0		0	0	0	0	0	0
72	2023-10-26	1988.6	1988.6	1988.6	1988.6	1988.6	1988.6	1988.6		0	0	0	0	0	0	0	0	0	0	0	0		0	0	0	0	0	0		0	0	0	0	0	0		0	0	0	0	0	0
73	2023-10-25	1987.2	1987.2	1987.2	1987.2	1987.2	1987.2	1987.2		0	0	0	0	0	0	0	0	0	0	0	0		0	0	0	0	0	0		0	0	0	0	0	0		0	0	0	0	0	0
74	2023-10-24	1984.1	1984.1	1984.1	1984.1	1984.1	1984.1	1984.1		0	0	0	0	0	0	0	0	0	0	0	0		0	0	0	0	0	0		0	0	0	0	0	0		0	0	0	0	0	0
75	2023-10-23	1975	1975.0	1975.0	1975.0	1975.0	1975.0	1975.0		0	0	0	0	0	0	0	0	0	0	0	0		0	0	0	0	0	0		0	0	0	0	0	0		0	0	0	0	0	0
76	2023-10-22	1976.3	1976.3	1976.3	1976.3	1976.3	1976.3	1976.3		0	0	0	0	0	0	0	0	0	0	0	0		0	0	0	0	0	0		0	0	0	0	0	0		0	0	0	0	0	0
77	2023-10-19	1982.5	1982.5	1982.5	1982.5	1982.5	1982.5	1982.5		0	0	0	0	0	0	0	0	0	0	0	0		0	0	0	0	0	0		0	0	0	0	0	0		0	0	0	0	0	0
78	2023-10-18	1968.4	1968.4	1968.4	1968.4	1968.4	1968.4	1968.4		0	0	0	0	0	0	0	0	0	0	0	0		0	0	0	0	0	0		0	0	0	0	0	0		0	0	0	0	0	0
79	2023-10-17	1955.3	1955.3	1955.3	1955.3	1955.3	1955.3	1955.3		0	0	0	0	0	0	0	0	0	0	0	0		0	0	0	0	0	0		0	0	0	0	0	0		0	0	0	0	0	0
80	2023-10-16	1922.7	1922.7	1922.7	1922.7	1922.7	1922.7	1922.7		0	0	0	0	0	0	0	0	0	0	0	0		0	0	0	0	0	0		0	0	0	0	0	0		0	0	0	0	0	0
81	2023-10-15	1921.1	1921.1	1921.1	1921.1	1921.1	1921.1	1921.1		0	0	0	0	0	0	0	0	0	0	0	0		0	0	0	0	0	0		0	0	0	0	0	0		0	0	0	0	0	0
82	2023-10-12	1927.4	1927.4	1927.4	1927.4	1927.4	1927.4	1927.4		0	0	0	0	0	0	0	0	0	0	0	0		0	0	0	0	0	0		0	0	0	0	0	0		0	0	0	0	0	0
83	2023-10-11	1869.3	1109.887	1862.130	1873.867	1871.567	1900.1	1202.242		-759.413	759.413	-7.17	7.17	4.567	4.567	2.267	2.267	30.8	30.8	-667.058	667.058		576708	51.4089	20.8575	5.13929	948.64	444966		0.406255	0.00383566	-0.00244316	-0.00121275	-0.0164768	0.356849		0.406255	0.00383566	0.00244316	0.00121275	0.0164768	0.356849
84	2023-10-10	1872.8	1872.8	1872.8	1872.8	1872.8	1872.8	1872.8		0	0	0	0	0	0	0	0	0	0	0	0		0	0	0	0	0	0		0	0	0	0	0	0		0	0	0	0	0	0
85	2023-10-09	1861	1861.0	1861.0	1861.0	1861.0	1861.0	1861.0		0	0	0	0	0	0	0	0	0	0	0	0		0	0	0	0	0	0		0	0	0	0	0	0		0	0	0	0	0	0
86	2023-10-08	1849.5	1849.5	1849.5	1849.5	1849.5	1849.5	1849.5		0	0	0	0	0	0	0	0	0	0	0	0		0	0	0	0	0	0		0	0	0	0	0	0		0	0	0	0	0	0
87	2023-10-05	1830.2	1830.2	1830.2	1830.2	1830.2	1830.2	1830.2		0	0	0	0	0	0	0	0	0	0	0	0		0	0	0	0	0	0		0	0	0	0	0	0		0	0	0	0	0	0
88	2023-10-04	1816.6	1816.6	1816.6	1816.6	1816.6	1816.6	1816.6		0	0	0	0	0	0	0	0	0	0	0	0		0	0	0	0	0	0		0	0	0	0	0	0		0	0	0	0	0	0
89	2023-10-03	1818.5	1818.5	1818.5	1818.5	1818.5	1818.5	1818.5		0	0	0	0	0	0	0	0	0	0	0	0		0	0	0	0	0	0		0	0	0	0	0	0		0	0	0	0	0	0
90	2023-10-02	1824.6	1824.6	1824.6	1824.6	1824.6	1824.6	1824.6		0	0	0	0	0	0	0	0	0	0	0	0		0	0	0	0	0	0		0	0	0	0	0	0		0	0	0	0	0	0
91	2023-10-01	1830	1830.0	1830.0	1830.0	1830.0	1830.0	1830.0		0	0	0	0	0	0	0	0	0	0	0	0		0	0	0	0	0	0		0	0	0	0	0	0		0	0	0	0	0	0
92	2023-09-28	1848.1	1109.887	1840.436	1858.033	1851.813	1852.8	1201.120		-738.213	738.213	-7.664	7.664	9.933	9.933	3.713	3.713	4.7	4.7	-646.98	646.98		544958	58.7369	98.6645	13.7864	22.09	418583		0.399444	0.00414696	-0.00537471	-0.00200909	-0.00254315	0.350078		0.399444	0.00414696	0.00537471	0.00200909	0.00254315	0.350078
93	2023-09-27	1860.4	1860.4	1860.4	1860.4	1860.4	1860.4	1860.4		0	0	0	0	0	0	0	0	0	0	0	0		0	0	0	0	0	0		0	0	0	0	0	0		0	0	0	0	0	0
94	2023-09-26	1871.6	1109.887	1875.491	1871.067	1872.323	1880.4	1202.014		-761.713	761.713	3.891	3.891	-0.533	0.533	0.723	0.723	8.8	8.8	-669.586	669.586		580207	15.1399	0.284089	0.522729	77.44	448345		0.406985	-0.00207897	0.000284783	-0.0003863	-0.00470186	0.357761		0.406985	0.00207897	0.000284783	0.0003863	0.00470186	0.357761
95	2023-09-25	1900.4	1900.4	1900.4	1900.4	1900.4	1900.4	1900.4		0	0	0	0	0	0	0	0	0	0	0	0		0	0	0	0	0	0		0	0	0	0	0	0		0	0	0	0	0	0
96	2023-09-24	1916.6	1109.887	1911.022	1917.867	1914.628	1906.650	1205.179		-806.713	806.713	-5.578	5.578	1.267	1.267	-1.972	1.972	-9.95	9.95	-711.421	711.421		650786	31.1141	1.60529	3.88878	99.0025	506120		0.420908	0.00291036	-0.000661066	0.00102891	0.00519148	0.371189		0.420908	0.00291036	0.000661066	0.00102891	0.00519148	0.371189
97	2023-09-21	1925.4	1925.4	1925.4	1925.4	1925.4	1925.4	1925.4		0	0	0	0	0	0	0	0	0	0	0	0		0	0	0	0	0	0		0	0	0	0	0	0		0	0	0	0	0	0
98	2023-09-20	1919.2	1919.2	1919.2	1919.2	1919.2	1919.2	1919.2		0	0	0	0	0	0	0	0	0	0	0	0		0	0	0	0	0	0		0	0	0	0	0	0		0	0	0	0	0	0
99	2023-09-19	1945.6	1945.6	1945.6	1945.6	1945.6	1945.6	1945.6		0	0	0	0	0	0	0	0	0	0	0	0		0	0	0	0	0	0		0	0	0	0	0	0		0	0	0	0	0	0
100	2023-09-18	1932	1932.0	1932.0	1932.0	1932.0	1932.0	1932.0		0	0	0	0	0	0	0	0	0	0	0	0		0	0	0	0	0	0		0	0	0	0	0	0		0	0	0	0	0	0
101	2023-09-17	1931.5	1109.887	1924.333	1927.1	1927.179	1929.925	1205.863		-821.613	821.613	-7.167	7.167	-4.4	4.4	-4.321	4.321	-1.575	1.575	-725.637	725.637		675048	51.3659	19.36	18.671	2.48063	526549		0.425376	0.00371059	0.00227802	0.00223712	0.000815428	0.375686		0.425376	0.00371059	0.00227802	0.00223712	0.000815428	0.375686
102	2023-09-14	1923.7	1923.7	1923.7	1923.7	1923.7	1923.7	1923.7		0	0	0	0	0	0	0	0	0	0	0	0		0	0	0	0	0	0		0	0	0	0	0	0		0	0	0	0	0	0
103	2023-09-13	1910	1910.0	1910.0	1910.0	1910.0	1910.0	1910.0		0	0	0	0	0	0	0	0	0	0	0	0		0	0	0	0	0	0		0	0	0	0	0	0		0	0	0	0	0	0
104	2023-09-12	1909.1	1909.1	1909.1	1909.1	1909.1	1909.1	1909.1		0	0	0	0	0	0	0	0	0	0	0	0		0	0	0	0	0	0		0	0	0	0	0	0		0	0	0	0	0	0
105	2023-09-11	1911.3	1911.3	1911.3	1911.3	1911.3	1911.3	1911.3		0	0	0	0	0	0	0	0	0	0	0	0		0	0	0	0	0	0		0	0	0	0	0	0		0	0	0	0	0	0
106	2023-09-10	1923.3	1923.3	1923.3	1923.3	1923.3	1923.3	1923.3		0	0	0	0	0	0	0	0	0	0	0	0		0	0	0	0	0	0		0	0	0	0	0	0		0	0	0	0	0	0
107	2023-09-07	1918.4	1918.4	1918.4	1918.4	1918.4	1918.4	1918.4		0	0	0	0	0	0	0	0	0	0	0	0		0	0	0	0	0	0		0	0	0	0	0	0		0	0	0	0	0	0
108	2023-09-06	1917.5	1917.5	1917.5	1917.5	1917.5	1917.5	1917.5		0	0	0	0	0	0	0	0	0	0	0	0		0	0	0	0	0	0		0	0	0	0	0	0		0	0	0	0	0	0
109	2023-09-05	1918.1	1918.1	1918.1	1918.1	1918.1	1918.1	1918.1		0	0	0	0	0	0	0	0	0	0	0	0		0	0	0	0	0	0		0	0	0	0	0	0		0	0	0	0	0	0
110	2023-09-04	1926.2	1926.2	1926.2	1926.2	1926.2	1926.2	1926.2		0	0	0	0	0	0	0	0	0	0	0	0		0	0	0	0	0	0		0	0	0	0	0	0		0	0	0	0	0	0
111	2023-08-31	1939.8	1939.8	1939.8	1939.8	1939.8	1939.8	1939.8		0	0	0	0	0	0	0	0	0	0	0	0		0	0	0	0	0	0		0	0	0	0	0	0		0	0	0	0	0	0
112	2023-08-30	1938.2	1938.2	1938.2	1938.2	1938.2	1938.2	1938.2		0	0	0	0	0	0	0	0	0	0	0	0		0	0	0	0	0	0		0	0	0	0	0	0		0	0	0	0	0	0
113	2023-08-29	1944.3	1944.3	1944.3	1944.3	1944.3	1944.3	1944.3		0	0	0	0	0	0	0	0	0	0	0	0		0	0	0	0	0	0		0	0	0	0	0	0		0	0	0	0	0	0
114	2023-08-28	1936.5	1936.5	1936.5	1936.5	1936.5	1936.5	1936.5		0	0	0	0	0	0	0	0	0	0	0	0		0	0	0	0	0	0		0	0	0	0	0	0		0	0	0	0	0	0
115	2023-08-27	1917.9	1917.9	1917.9	1917.9	1917.9	1917.9	1917.9		0	0	0	0	0	0	0	0	0	0	0	0		0	0	0	0	0	0		0	0	0	0	0	0		0	0	0	0	0	0
116	2023-08-24	1911.1	1911.1	1911.1	1911.1	1911.1	1911.1	1911.1		0	0	0	0	0	0	0	0	0	0	0	0		0	0	0	0	0	0		0	0	0	0	0	0		0	0	0	0	0	0
117	2023-08-23	1918.2	1918.2	1918.2	1918.2	1918.2	1918.2	1918.2		0	0	0	0	0	0	0	0	0	0	0	0		0	0	0	0	0	0		0	0	0	0	0	0		0	0	0	0	0	0
118	2023-08-22	1918.5	1918.5	1918.5	1918.5	1918.5	1918.5	1918.5		0	0	0	0	0	0	0	0	0	0	0	0		0	0	0	0	0	0		0	0	0	0	0	0		0	0	0	0	0	0
119	2023-08-21	1896.4	1896.4	1896.4	1896.4	1896.4	1896.4	1896.4		0	0	0	0	0	0	0	0	0	0	0	0		0	0	0	0	0	0		0	0	0	0	0	0		0	0	0	0	0	0
120	2023-08-20	1893.3	1893.3	1893.3	1893.3	1893.3	1893.3	1893.3		0	0	0	0	0	0	0	0	0	0	0	0		0	0	0	0	0	0		0	0	0	0	0	0		0	0	0	0	0	0
121	2023-08-17	1886.1	1886.1	1886.1	1886.1	1886.1	1886.1	1886.1		0	0	0	0	0	0	0	0	0	0	0	0		0	0	0	0	0	0		0	0	0	0	0	0		0	0	0	0	0	0
122	2023-08-16	1884.1	1884.1	1884.1	1884.1	1884.1	1884.1	1884.1		0	0	0	0	0	0	0	0	0	0	0	0		0	0	0	0	0	0		0	0	0	0	0	0		0	0	0	0	0	0
123	2023-08-15	1896.1	1896.1	1896.1	1896.1	1896.1	1896.1	1896.1		0	0	0	0	0	0	0	0	0	0	0	0		0	0	0	0	0	0		0	0	0	0	0	0		0	0	0	0	0	0
124	2023-08-14	1902.5	1902.5	1902.5	1902.5	1902.5	1902.5	1902.5		0	0	0	0	0	0	0	0	0	0	0	0		0	0	0	0	0	0		0	0	0	0	0	0		0	0	0	0	0	0
125	2023-08-13	1910.6	1910.6	1910.6	1910.6	1910.6	1910.6	1910.6		0	0	0	0	0	0	0	0	0	0	0	0		0	0	0	0	0	0		0	0	0	0	0	0		0	0	0	0	0	0
126	2023-08-10	1912.9	1912.9	1912.9	1912.9	1912.9	1912.9	1912.9		0	0	0	0	0	0	0	0	0	0	0	0		0	0	0	0	0	0		0	0	0	0	0	0		0	0	0	0	0	0
127	2023-08-09	1914.4	1914.4	1914.4	1914.4	1914.4	1914.4	1914.4		0	0	0	0	0	0	0	0	0	0	0	0		0	0	0	0	0	0		0	0	0	0	0	0		0	0	0	0	0	0
128	2023-08-08	1915.4	1915.4	1915.4	1915.4	1915.4	1915.4	1915.4		0	0	0	0	0	0	0	0	0	0	0	0		0	0	0	0	0	0		0	0	0	0	0	0		0	0	0	0	0	0
129	2023-08-07	1924.1	1924.1	1924.1	1924.1	1924.1	1924.1	1924.1		0	0	0	0	0	0	0	0	0	0	0	0		0	0	0	0	0	0		0	0	0	0	0	0		0	0	0	0	0	0
130	2023-08-06	1933.5	1933.5	1933.5	1933.5	1933.5	1933.5	1933.5		0	0	0	0	0	0	0	0	0	0	0	0		0	0	0	0	0	0		0	0	0	0	0	0		0	0	0	0	0	0
131	2023-08-03	1939.6	1939.6	1939.6	1939.6	1939.6	1939.6	1939.6		0	0	0	0	0	0	0	0	0	0	0	0		0	0	0	0	0	0		0	0	0	0	0	0		0	0	0	0	0	0
132	2023-08-02	1932	1932.0	1932.0	1932.0	1932.0	1932.0	1932.0		0	0	0	0	0	0	0	0	0	0	0	0		0	0	0	0	0	0		0	0	0	0	0	0		0	0	0	0	0	0
133	2023-08-01	1937.4	1937.4	1937.4	1937.4	1937.4	1937.4	1937.4		0	0	0	0	0	0	0	0	0	0	0	0		0	0	0	0	0	0		0	0	0	0	0	0		0	0	0	0	0	0
134	2023-07-31	1940.7	1940.7	1940.7	1940.7	1940.7	1940.7	1940.7		0	0	0	0	0	0	0	0	0	0	0	0		0	0	0	0	0	0		0	0	0	0	0	0		0	0	0	0	0	0
135	2023-07-30	1970.5	1970.5	1970.5	1970.5	1970.5	1970.5	1970.5		0	0	0	0	0	0	0	0	0	0	0	0		0	0	0	0	0	0		0	0	0	0	0	0		0	0	0	0	0	0
136	2023-07-27	1960.4	1960.4	1960.4	1960.4	1960.4	1960.4	1960.4		0	0	0	0	0	0	0	0	0	0	0	0		0	0	0	0	0	0		0	0	0	0	0	0		0	0	0	0	0	0
137	2023-07-26	1945.4	1945.4	1945.4	1945.4	1945.4	1945.4	1945.4		0	0	0	0	0	0	0	0	0	0	0	0		0	0	0	0	0	0		0	0	0	0	0	0		0	0	0	0	0	0
138	2023-07-25	1968.9	1968.9	1968.9	1968.9	1968.9	1968.9	1968.9		0	0	0	0	0	0	0	0	0	0	0	0		0	0	0	0	0	0		0	0	0	0	0	0		0	0	0	0	0	0
139	2023-07-24	1962.1	1109.887	1960.092	1955.933	1959.494	1964.6	1207.111		-852.213	852.213	-2.008	2.008	-6.167	6.167	-2.606	2.606	2.5	2.5	-754.989	754.989		726267	4.03206	38.0319	6.79124	6.25	570008		0.434337	0.00102339	0.00314306	0.00132817	-0.00127415	0.384786		0.434337	0.00102339	0.00314306	0.00132817	0.00127415	0.384786
140	2023-07-23	1960.3	1960.3	1960.3	1960.3	1960.3	1960.3	1960.3		0	0	0	0	0	0	0	0	0	0	0	0		0	0	0	0	0	0		0	0	0	0	0	0		0	0	0	0	0	0
141	2023-07-20	1964.3	1964.3	1964.3	1964.3	1964.3	1964.3	1964.3		0	0	0	0	0	0	0	0	0	0	0	0		0	0	0	0	0	0		0	0	0	0	0	0		0	0	0	0	0	0
142	2023-07-19	1968.3	1968.3	1968.3	1968.3	1968.3	1968.3	1968.3		0	0	0	0	0	0	0	0	0	0	0	0		0	0	0	0	0	0		0	0	0	0	0	0		0	0	0	0	0	0
143	2023-07-18	1977.5	1977.5	1977.5	1977.5	1977.5	1977.5	1977.5		0	0	0	0	0	0	0	0	0	0	0	0		0	0	0	0	0	0		0	0	0	0	0	0		0	0	0	0	0	0
144	2023-07-17	1977.2	1977.2	1977.2	1977.2	1977.2	1977.2	1977.2		0	0	0	0	0	0	0	0	0	0	0	0		0	0	0	0	0	0		0	0	0	0	0	0		0	0	0	0	0	0
145	2023-07-16	1952.4	1952.4	1952.4	1952.4	1952.4	1952.4	1952.4		0	0	0	0	0	0	0	0	0	0	0	0		0	0	0	0	0	0		0	0	0	0	0	0		0	0	0	0	0	0
146	2023-07-13	1960.1	1960.1	1960.1	1960.1	1960.1	1960.1	1960.1		0	0	0	0	0	0	0	0	0	0	0	0		0	0	0	0	0	0		0	0	0	0	0	0		0	0	0	0	0	0
147	2023-07-12	1959.2	1959.2	1959.2	1959.2	1959.2	1959.2	1959.2		0	0	0	0	0	0	0	0	0	0	0	0		0	0	0	0	0	0		0	0	0	0	0	0		0	0	0	0	0	0
148	2023-07-11	1956.2	1109.887	1955.642	1951.733	1953.607	1945.250	1206.459		-846.313	846.313	-0.558	0.558	-4.467	4.467	-2.593	2.593	-10.95	10.95	-749.741	749.741		716246	0.311364	19.9541	6.72365	119.903	562112		0.432631	0.000285247	0.00228351	0.00132553	0.00559759	0.383264		0.432631	0.000285247	0.00228351	0.00132553	0.00559759	0.383264
149	2023-07-10	1931.3	1931.3	1931.3	1931.3	1931.3	1931.3	1931.3		0	0	0	0	0	0	0	0	0	0	0	0		0	0	0	0	0	0		0	0	0	0	0	0		0	0	0	0	0	0
150	2023-07-09	1925	1925.0	1925.0	1925.0	1925.0	1925.0	1925.0		0	0	0	0	0	0	0	0	0	0	0	0		0	0	0	0	0	0		0	0	0	0	0	0		0	0	0	0	0	0
151	2023-07-06	1926.2	1926.2	1926.2	1926.2	1926.2	1926.2	1926.2		0	0	0	0	0	0	0	0	0	0	0	0		0	0	0	0	0	0		0	0	0	0	0	0		0	0	0	0	0	0
152	2023-07-05	1908.7	1908.7	1908.7	1908.7	1908.7	1908.7	1908.7		0	0	0	0	0	0	0	0	0	0	0	0		0	0	0	0	0	0		0	0	0	0	0	0		0	0	0	0	0	0
153	2023-07-04	1919.6	1919.6	1919.6	1919.6	1919.6	1919.6	1919.6		0	0	0	0	0	0	0	0	0	0	0	0		0	0	0	0	0	0		0	0	0	0	0	0		0	0	0	0	0	0
154	2023-07-03	1921.7	1921.7	1921.7	1921.7	1921.7	1921.7	1921.7		0	0	0	0	0	0	0	0	0	0	0	0		0	0	0	0	0	0		0	0	0	0	0	0		0	0	0	0	0	0
155	2023-06-29	1921.1	1921.1	1921.1	1921.1	1921.1	1921.1	1921.1		0	0	0	0	0	0	0	0	0	0	0	0		0	0	0	0	0	0		0	0	0	0	0	0		0	0	0	0	0	0
156	2023-06-28	1909.2	1909.2	1909.2	1909.2	1909.2	1909.2	1909.2		0	0	0	0	0	0	0	0	0	0	0	0		0	0	0	0	0	0		0	0	0	0	0	0		0	0	0	0	0	0
157	2023-06-27	1912.3	1912.3	1912.3	1912.3	1912.3	1912.3	1912.3		0	0	0	0	0	0	0	0	0	0	0	0		0	0	0	0	0	0		0	0	0	0	0	0		0	0	0	0	0	0
158	2023-06-26	1914	1914.0	1914.0	1914.0	1914.0	1914.0	1914.0		0	0	0	0	0	0	0	0	0	0	0	0		0	0	0	0	0	0		0	0	0	0	0	0		0	0	0	0	0	0
159	2023-06-25	1923.7	1923.7	1923.7	1923.7	1923.7	1923.7	1923.7		0	0	0	0	0	0	0	0	0	0	0	0		0	0	0	0	0	0		0	0	0	0	0	0		0	0	0	0	0	0
160	2023-06-22	1919.1	1919.1	1919.1	1919.1	1919.1	1919.1	1919.1		0	0	0	0	0	0	0	0	0	0	0	0		0	0	0	0	0	0		0	0	0	0	0	0		0	0	0	0	0	0
161	2023-06-21	1912.7	1912.7	1912.7	1912.7	1912.7	1912.7	1912.7		0	0	0	0	0	0	0	0	0	0	0	0		0	0	0	0	0	0		0	0	0	0	0	0		0	0	0	0	0	0
162	2023-06-20	1933.3	1933.3	1933.3	1933.3	1933.3	1933.3	1933.3		0	0	0	0	0	0	0	0	0	0	0	0		0	0	0	0	0	0		0	0	0	0	0	0		0	0	0	0	0	0
163	2023-06-19	1935.5	1935.5	1935.5	1935.5	1935.5	1935.5	1935.5		0	0	0	0	0	0	0	0	0	0	0	0		0	0	0	0	0	0		0	0	0	0	0	0		0	0	0	0	0	0
164	2023-06-15	1958.4	1958.4	1958.4	1958.4	1958.4	1958.4	1958.4		0	0	0	0	0	0	0	0	0	0	0	0		0	0	0	0	0	0		0	0	0	0	0	0		0	0	0	0	0	0
165	2023-06-14	1957.8	1957.8	1957.8	1957.8	1957.8	1957.8	1957.8		0	0	0	0	0	0	0	0	0	0	0	0		0	0	0	0	0	0		0	0	0	0	0	0		0	0	0	0	0	0
166	2023-06-13	1955.3	1955.3	1955.3	1955.3	1955.3	1955.3	1955.3		0	0	0	0	0	0	0	0	0	0	0	0		0	0	0	0	0	0		0	0	0	0	0	0		0	0	0	0	0	0
167	2023-06-12	1944.6	1944.6	1944.6	1944.6	1944.6	1944.6	1944.6		0	0	0	0	0	0	0	0	0	0	0	0		0	0	0	0	0	0		0	0	0	0	0	0		0	0	0	0	0	0
168	2023-06-11	1955.3	1955.3	1955.3	1955.3	1955.3	1955.3	1955.3		0	0	0	0	0	0	0	0	0	0	0	0		0	0	0	0	0	0		0	0	0	0	0	0		0	0	0	0	0	0
169	2023-06-08	1962.2	1962.2	1962.2	1962.2	1962.2	1962.2	1962.2		0	0	0	0	0	0	0	0	0	0	0	0		0	0	0	0	0	0		0	0	0	0	0	0		0	0	0	0	0	0
170	2023-06-07	1963.6	1963.6	1963.6	1963.6	1963.6	1963.6	1963.6		0	0	0	0	0	0	0	0	0	0	0	0		0	0	0	0	0	0		0	0	0	0	0	0		0	0	0	0	0	0
171	2023-06-06	1942.7	1942.7	1942.7	1942.7	1942.7	1942.7	1942.7		0	0	0	0	0	0	0	0	0	0	0	0		0	0	0	0	0	0		0	0	0	0	0	0		0	0	0	0	0	0
172	2023-06-05	1965.5	1109.887	1960.092	1962.033	1961.756	1950.350	1207.310		-855.613	855.613	-5.408	5.408	-3.467	3.467	-3.744	3.744	-15.15	15.15	-758.19	758.19		732074	29.2465	12.0201	14.0175	229.523	574852		0.435316	0.00275146	0.00176393	0.00190486	0.00770796	0.385749		0.435316	0.00275146	0.00176393	0.00190486	0.00770796	0.385749
173	2023-06-04	1958	1958.0	1958.0	1958.0	1958.0	1958.0	1958.0		0	0	0	0	0	0	0	0	0	0	0	0		0	0	0	0	0	0		0	0	0	0	0	0		0	0	0	0	0	0
174	2023-06-01	1952.4	1952.4	1952.4	1952.4	1952.4	1952.4	1952.4		0	0	0	0	0	0	0	0	0	0	0	0		0	0	0	0	0	0		0	0	0	0	0	0		0	0	0	0	0	0
175	2023-05-31	1978	1978.0	1978.0	1978.0	1978.0	1978.0	1978.0		0	0	0	0	0	0	0	0	0	0	0	0		0	0	0	0	0	0		0	0	0	0	0	0		0	0	0	0	0	0
176	2023-05-30	1963.9	1963.9	1963.9	1963.9	1963.9	1963.9	1963.9		0	0	0	0	0	0	0	0	0	0	0	0		0	0	0	0	0	0		0	0	0	0	0	0		0	0	0	0	0	0
177	2023-05-29	1958	1958.0	1958.0	1958.0	1958.0	1958.0	1958.0		0	0	0	0	0	0	0	0	0	0	0	0		0	0	0	0	0	0		0	0	0	0	0	0		0	0	0	0	0	0
178	2023-05-25	1944.1	1944.1	1944.1	1944.1	1944.1	1944.1	1944.1		0	0	0	0	0	0	0	0	0	0	0	0		0	0	0	0	0	0		0	0	0	0	0	0		0	0	0	0	0	0
179	2023-05-24	1943.1	1943.1	1943.1	1943.1	1943.1	1943.1	1943.1		0	0	0	0	0	0	0	0	0	0	0	0		0	0	0	0	0	0		0	0	0	0	0	0		0	0	0	0	0	0
180	2023-05-23	1962.8	1962.8	1962.8	1962.8	1962.8	1962.8	1962.8		0	0	0	0	0	0	0	0	0	0	0	0		0	0	0	0	0	0		0	0	0	0	0	0		0	0	0	0	0	0
181	2023-05-22	1972.4	1972.4	1972.4	1972.4	1972.4	1972.4	1972.4		0	0	0	0	0	0	0	0	0	0	0	0		0	0	0	0	0	0		0	0	0	0	0	0		0	0	0	0	0	0
182	2023-05-21	1974.8	1974.8	1974.8	1974.8	1974.8	1974.8	1974.8		0	0	0	0	0	0	0	0	0	0	0	0		0	0	0	0	0	0		0	0	0	0	0	0		0	0	0	0	0	0
183	2023-05-18	1978.7	1978.7	1978.7	1978.7	1978.7	1978.7	1978.7		0	0	0	0	0	0	0	0	0	0	0	0		0	0	0	0	0	0		0	0	0	0	0	0		0	0	0	0	0	0
184	2023-05-17	1956.5	1956.5	1956.5	1956.5	1956.5	1956.5	1956.5		0	0	0	0	0	0	0	0	0	0	0	0		0	0	0	0	0	0		0	0	0	0	0	0		0	0	0	0	0	0
185	2023-05-16	1980.7	1980.7	1980.7	1980.7	1980.7	1980.7	1980.7		0	0	0	0	0	0	0	0	0	0	0	0		0	0	0	0	0	0		0	0	0	0	0	0		0	0	0	0	0	0
186	2023-05-15	1988.4	1988.4	1988.4	1988.4	1988.4	1988.4	1988.4		0	0	0	0	0	0	0	0	0	0	0	0		0	0	0	0	0	0		0	0	0	0	0	0		0	0	0	0	0	0
187	2023-05-14	2018	2018.0	2018.0	2018.0	2018.0	2018.0	2018.0		0	0	0	0	0	0	0	0	0	0	0	0		0	0	0	0	0	0		0	0	0	0	0	0		0	0	0	0	0	0
188	2023-05-11	2014.5	2014.5	2014.5	2014.5	2014.5	2014.5	2014.5		0	0	0	0	0	0	0	0	0	0	0	0		0	0	0	0	0	0		0	0	0	0	0	0		0	0	0	0	0	0
189	2023-05-10	2014.7	2014.7	2014.7	2014.7	2014.7	2014.7	2014.7		0	0	0	0	0	0	0	0	0	0	0	0		0	0	0	0	0	0		0	0	0	0	0	0		0	0	0	0	0	0
190	2023-05-09	2030.5	2030.5	2030.5	2030.5	2030.5	2030.5	2030.5		0	0	0	0	0	0	0	0	0	0	0	0		0	0	0	0	0	0		0	0	0	0	0	0		0	0	0	0	0	0
191	2023-05-08	2036.2	1109.887	2030.156	2031.533	2031.995	2028.4	1208.345		-926.313	926.313	-6.044	6.044	-4.667	4.667	-4.205	4.205	-7.8	7.8	-827.855	827.855		858056	36.5299	21.7809	17.682	60.84	685344		0.454922	0.00296827	0.00229201	0.00206512	0.00383066	0.406569		0.454922	0.00296827	0.00229201	0.00206512	0.00383066	0.406569
192	2023-05-07	2026.3	2026.3	2026.3	2026.3	2026.3	2026.3	2026.3		0	0	0	0	0	0	0	0	0	0	0	0		0	0	0	0	0	0		0	0	0	0	0	0		0	0	0	0	0	0
193	2023-05-04	2017.4	1109.887	2019.917	2012.667	2014.952	2042.575	1208.276		-907.513	907.513	2.517	2.517	-4.733	4.733	-2.448	2.448	25.175	25.175	-809.124	809.124		823580	6.33529	22.4013	5.9927	633.781	654682		0.449843	-0.00124765	0.00234609	0.00121344	-0.0124789	0.401073		0.449843	0.00124765	0.00234609	0.00121344	0.0124789	0.401073
194	2023-05-03	2048	2048.0	2048.0	2048.0	2048.0	2048.0	2048.0		0	0	0	0	0	0	0	0	0	0	0	0		0	0	0	0	0	0		0	0	0	0	0	0		0	0	0	0	0	0
195	2023-05-02	2028.6	2028.6	2028.6	2028.6	2028.6	2028.6	2028.6		0	0	0	0	0	0	0	0	0	0	0	0		0	0	0	0	0	0		0	0	0	0	0	0		0	0	0	0	0	0
196	2023-05-01	2014.3	2014.3	2014.3	2014.3	2014.3	2014.3	2014.3		0	0	0	0	0	0	0	0	0	0	0	0		0	0	0	0	0	0		0	0	0	0	0	0		0	0	0	0	0	0
197	2023-04-30	1983.4	1983.4	1983.4	1983.4	1983.4	1983.4	1983.4		0	0	0	0	0	0	0	0	0	0	0	0		0	0	0	0	0	0		0	0	0	0	0	0		0	0	0	0	0	0
198	2023-04-27	1990.1	1990.1	1990.1	1990.1	1990.1	1990.1	1990.1		0	0	0	0	0	0	0	0	0	0	0	0		0	0	0	0	0	0		0	0	0	0	0	0		0	0	0	0	0	0
199	2023-04-26	1989.9	1989.9	1989.9	1989.9	1989.9	1989.9	1989.9		0	0	0	0	0	0	0	0	0	0	0	0		0	0	0	0	0	0		0	0	0	0	0	0		0	0	0	0	0	0
200	2023-04-25	1985.7	1985.7	1985.7	1985.7	1985.7	1985.7	1985.7		0	0	0	0	0	0	0	0	0	0	0	0		0	0	0	0	0	0		0	0	0	0	0	0		0	0	0	0	0	0
201	2023-04-24	1994	1994.0	1994.0	1994.0	1994.0	1994.0	1994.0		0	0	0	0	0	0	0	0	0	0	0	0		0	0	0	0	0	0		0	0	0	0	0	0		0	0	0	0	0	0
202	2023-04-23	1989.1	1989.1	1989.1	1989.1	1989.1	1989.1	1989.1		0	0	0	0	0	0	0	0	0	0	0	0		0	0	0	0	0	0		0	0	0	0	0	0		0	0	0	0	0	0
203	2023-04-20	1979.5	1979.5	1979.5	1979.5	1979.5	1979.5	1979.5		0	0	0	0	0	0	0	0	0	0	0	0		0	0	0	0	0	0		0	0	0	0	0	0		0	0	0	0	0	0
204	2023-04-19	2007.6	2007.6	2007.6	2007.6	2007.6	2007.6	2007.6		0	0	0	0	0	0	0	0	0	0	0	0		0	0	0	0	0	0		0	0	0	0	0	0		0	0	0	0	0	0
205	2023-04-18	1995.2	1995.2	1995.2	1995.2	1995.2	1995.2	1995.2		0	0	0	0	0	0	0	0	0	0	0	0		0	0	0	0	0	0		0	0	0	0	0	0		0	0	0	0	0	0
206	2023-04-17	2007.4	2007.4	2007.4	2007.4	2007.4	2007.4	2007.4		0	0	0	0	0	0	0	0	0	0	0	0		0	0	0	0	0	0		0	0	0	0	0	0		0	0	0	0	0	0
207	2023-04-16	1994.2	1994.2	1994.2	1994.2	1994.2	1994.2	1994.2		0	0	0	0	0	0	0	0	0	0	0	0		0	0	0	0	0	0		0	0	0	0	0	0		0	0	0	0	0	0
208	2023-04-13	2002.2	2002.2	2002.2	2002.2	2002.2	2002.2	2002.2		0	0	0	0	0	0	0	0	0	0	0	0		0	0	0	0	0	0		0	0	0	0	0	0		0	0	0	0	0	0
209	2023-04-12	2041.3	2041.3	2041.3	2041.3	2041.3	2041.3	2041.3		0	0	0	0	0	0	0	0	0	0	0	0		0	0	0	0	0	0		0	0	0	0	0	0		0	0	0	0	0	0
210	2023-04-11	2010.9	2010.9	2010.9	2010.9	2010.9	2010.9	2010.9		0	0	0	0	0	0	0	0	0	0	0	0		0	0	0	0	0	0		0	0	0	0	0	0		0	0	0	0	0	0
211	2023-04-10	2004.8	2004.8	2004.8	2004.8	2004.8	2004.8	2004.8		0	0	0	0	0	0	0	0	0	0	0	0		0	0	0	0	0	0		0	0	0	0	0	0		0	0	0	0	0	0
212	2023-04-09	1989.1	1989.1	1989.1	1989.1	1989.1	1989.1	1989.1		0	0	0	0	0	0	0	0	0	0	0	0		0	0	0	0	0	0		0	0	0	0	0	0		0	0	0	0	0	0
213	2023-04-05	2011.9	1109.887	2015.639	2011.833	2010.150	2014.540	1208.353		-902.013	902.013	3.739	3.739	-0.067	0.067	-1.75	1.75	2.64	2.64	-803.547	803.547		813627	13.9801	0.004489	3.0625	6.9696	645688		0.448339	-0.00185844	3.33019e-05	0.000869825	-0.00131219	0.399397		0.448339	0.00185844	3.33019e-05	0.000869825	0.00131219	0.399397
214	2023-04-04	2020.9	2020.9	2020.9	2020.9	2020.9	2020.9	2020.9		0	0	0	0	0	0	0	0	0	0	0	0		0	0	0	0	0	0		0	0	0	0	0	0		0	0	0	0	0	0
215	2023-04-03	2022.2	2022.2	2022.2	2022.2	2022.2	2022.2	2022.2		0	0	0	0	0	0	0	0	0	0	0	0		0	0	0	0	0	0		0	0	0	0	0	0		0	0	0	0	0	0
216	2023-04-02	1983.9	1983.9	1983.9	1983.9	1983.9	1983.9	1983.9		0	0	0	0	0	0	0	0	0	0	0	0		0	0	0	0	0	0		0	0	0	0	0	0		0	0	0	0	0	0
217	2023-03-30	1969	1969.0	1969.0	1969.0	1969.0	1969.0	1969.0		0	0	0	0	0	0	0	0	0	0	0	0		0	0	0	0	0	0		0	0	0	0	0	0		0	0	0	0	0	0
218	2023-03-29	1980.3	1980.3	1980.3	1980.3	1980.3	1980.3	1980.3		0	0	0	0	0	0	0	0	0	0	0	0		0	0	0	0	0	0		0	0	0	0	0	0		0	0	0	0	0	0
219	2023-03-28	1966.1	1966.1	1966.1	1966.1	1966.1	1966.1	1966.1		0	0	0	0	0	0	0	0	0	0	0	0		0	0	0	0	0	0		0	0	0	0	0	0		0	0	0	0	0	0
220	2023-03-27	1972.4	1972.4	1972.4	1972.4	1972.4	1972.4	1972.4		0	0	0	0	0	0	0	0	0	0	0	0		0	0	0	0	0	0		0	0	0	0	0	0		0	0	0	0	0	0
221	2023-03-26	1952.4	1952.4	1952.4	1952.4	1952.4	1952.4	1952.4		0	0	0	0	0	0	0	0	0	0	0	0		0	0	0	0	0	0		0	0	0	0	0	0		0	0	0	0	0	0
222	2023-03-23	1982.1	1109.887	1987.336	1986.133	1989.845	1983.450	1208.063		-872.213	872.213	5.236	5.236	4.033	4.033	7.745	7.745	1.35	1.35	-774.037	774.037		760756	27.4157	16.2651	59.985	1.8225	599133		0.440045	-0.00264164	-0.00203471	-0.00390747	-0.000681096	0.390514		0.440045	0.00264164	0.00203471	0.00390747	0.000681096	0.390514
223	2023-03-22	1993.8	1993.8	1993.8	1993.8	1993.8	1993.8	1993.8		0	0	0	0	0	0	0	0	0	0	0	0		0	0	0	0	0	0		0	0	0	0	0	0		0	0	0	0	0	0
224	2023-03-21	1946.8	1946.8	1946.8	1946.8	1946.8	1946.8	1946.8		0	0	0	0	0	0	0	0	0	0	0	0		0	0	0	0	0	0		0	0	0	0	0	0		0	0	0	0	0	0
225	2023-03-20	1938	1938.0	1938.0	1938.0	1938.0	1938.0	1938.0		0	0	0	0	0	0	0	0	0	0	0	0		0	0	0	0	0	0		0	0	0	0	0	0		0	0	0	0	0	0
226	2023-03-19	1979.2	1979.2	1979.2	1979.2	1979.2	1979.2	1979.2		0	0	0	0	0	0	0	0	0	0	0	0		0	0	0	0	0	0		0	0	0	0	0	0		0	0	0	0	0	0
227	2023-03-16	1969.8	1969.8	1969.8	1969.8	1969.8	1969.8	1969.8		0	0	0	0	0	0	0	0	0	0	0	0		0	0	0	0	0	0		0	0	0	0	0	0		0	0	0	0	0	0
228	2023-03-15	1919	1919.0	1919.0	1919.0	1919.0	1919.0	1919.0		0	0	0	0	0	0	0	0	0	0	0	0		0	0	0	0	0	0		0	0	0	0	0	0		0	0	0	0	0	0
229	2023-03-14	1926.6	1926.6	1926.6	1926.6	1926.6	1926.6	1926.6		0	0	0	0	0	0	0	0	0	0	0	0		0	0	0	0	0	0		0	0	0	0	0	0		0	0	0	0	0	0
230	2023-03-13	1906.2	1109.887	1906.650	1907.9	1906.960	1919.150	1204.691		-796.313	796.313	0.45	0.45	1.7	1.7	0.76	0.76	12.95	12.95	-701.509	701.509		634114	0.2025	2.89	0.5776	167.703	492115		0.417749	-0.000236072	-0.000891827	-0.000398699	-0.00679362	0.368014		0.417749	0.000236072	0.000891827	0.000398699	0.00679362	0.368014
231	2023-03-12	1911.7	1911.7	1911.7	1911.7	1911.7	1911.7	1911.7		0	0	0	0	0	0	0	0	0	0	0	0		0	0	0	0	0	0		0	0	0	0	0	0		0	0	0	0	0	0
232	2023-03-10	1862	1862.0	1862.0	1862.0	1862.0	1862.0	1862.0		0	0	0	0	0	0	0	0	0	0	0	0		0	0	0	0	0	0		0	0	0	0	0	0		0	0	0	0	0	0
233	2023-03-09	1829.3	1829.3	1829.3	1829.3	1829.3	1829.3	1829.3		0	0	0	0	0	0	0	0	0	0	0	0		0	0	0	0	0	0		0	0	0	0	0	0		0	0	0	0	0	0
234	2023-03-08	1812.7	1812.7	1812.7	1812.7	1812.7	1812.7	1812.7		0	0	0	0	0	0	0	0	0	0	0	0		0	0	0	0	0	0		0	0	0	0	0	0		0	0	0	0	0	0
235	2023-03-07	1813.9	1813.9	1813.9	1813.9	1813.9	1813.9	1813.9		0	0	0	0	0	0	0	0	0	0	0	0		0	0	0	0	0	0		0	0	0	0	0	0		0	0	0	0	0	0
236	2023-03-06	1847.9	1847.9	1847.9	1847.9	1847.9	1847.9	1847.9		0	0	0	0	0	0	0	0	0	0	0	0		0	0	0	0	0	0		0	0	0	0	0	0		0	0	0	0	0	0
237	2023-03-03	1847.7	1847.7	1847.7	1847.7	1847.7	1847.7	1847.7		0	0	0	0	0	0	0	0	0	0	0	0		0	0	0	0	0	0		0	0	0	0	0	0		0	0	0	0	0	0
238	2023-03-02	1833.5	1833.5	1833.5	1833.5	1833.5	1833.5	1833.5		0	0	0	0	0	0	0	0	0	0	0	0		0	0	0	0	0	0		0	0	0	0	0	0		0	0	0	0	0	0
239	2023-03-01	1837.7	1837.7	1837.7	1837.7	1837.7	1837.7	1837.7		0	0	0	0	0	0	0	0	0	0	0	0		0	0	0	0	0	0		0	0	0	0	0	0		0	0	0	0	0	0
240	2023-02-28	1828.9	1828.9	1828.9	1828.9	1828.9	1828.9	1828.9		0	0	0	0	0	0	0	0	0	0	0	0		0	0	0	0	0	0		0	0	0	0	0	0		0	0	0	0	0	0
241	2023-02-27	1817	1817.0	1817.0	1817.0	1817.0	1817.0	1817.0		0	0	0	0	0	0	0	0	0	0	0	0		0	0	0	0	0	0		0	0	0	0	0	0		0	0	0	0	0	0
242	2023-02-24	1808.8	1808.8	1808.8	1808.8	1808.8	1808.8	1808.8		0	0	0	0	0	0	0	0	0	0	0	0		0	0	0	0	0	0		0	0	0	0	0	0		0	0	0	0	0	0
243	2023-02-23	1818	1818.0	1818.0	1818.0	1818.0	1818.0	1818.0		0	0	0	0	0	0	0	0	0	0	0	0		0	0	0	0	0	0		0	0	0	0	0	0		0	0	0	0	0	0
244	2023-02-22	1832	1832.0	1832.0	1832.0	1832.0	1832.0	1832.0		0	0	0	0	0	0	0	0	0	0	0	0		0	0	0	0	0	0		0	0	0	0	0	0		0	0	0	0	0	0
245	2023-02-21	1833	1833.0	1833.0	1833.0	1833.0	1833.0	1833.0		0	0	0	0	0	0	0	0	0	0	0	0		0	0	0	0	0	0		0	0	0	0	0	0		0	0	0	0	0	0
246	2023-02-17	1840.4	1840.4	1840.4	1840.4	1840.4	1840.4	1840.4		0	0	0	0	0	0	0	0	0	0	0	0		0	0	0	0	0	0		0	0	0	0	0	0		0	0	0	0	0	0
247	2023-02-16	1842	1842.0	1842.0	1842.0	1842.0	1842.0	1842.0		0	0	0	0	0	0	0	0	0	0	0	0		0	0	0	0	0	0		0	0	0	0	0	0		0	0	0	0	0	0
248	2023-02-15	1834.2	1834.2	1834.2	1834.2	1834.2	1834.2	1834.2		0	0	0	0	0	0	0	0	0	0	0	0		0	0	0	0	0	0		0	0	0	0	0	0		0	0	0	0	0	0
249	2023-02-14	1854	1854.0	1854.0	1854.0	1854.0	1854.0	1854.0		0	0	0	0	0	0	0	0	0	0	0	0		0	0	0	0	0	0		0	0	0	0	0	0		0	0	0	0	0	0
250	2023-02-13	1851.9	1851.9	1851.9	1851.9	1851.9	1851.9	1851.9		0	0	0	0	0	0	0	0	0	0	0	0		0	0	0	0	0	0		0	0	0	0	0	0		0	0	0	0	0	0
251	2023-02-10	1862.8	1862.8	1862.8	1862.8	1862.8	1862.8	1862.8		0	0	0	0	0	0	0	0	0	0	0	0		0	0	0	0	0	0		0	0	0	0	0	0		0	0	0	0	0	0
252	2023-02-09	1866.2	1866.2	1866.2	1866.2	1866.2	1866.2	1866.2		0	0	0	0	0	0	0	0	0	0	0	0		0	0	0	0	0	0		0	0	0	0	0	0		0	0	0	0	0	0
253	2023-02-08	1877.4	1877.4	1877.4	1877.4	1877.4	1877.4	1877.4		0	0	0	0	0	0	0	0	0	0	0	0		0	0	0	0	0	0		0	0	0	0	0	0		0	0	0	0	0	0
254	2023-02-07	1871.7	1871.7	1871.7	1871.7	1871.7	1871.7	1871.7		0	0	0	0	0	0	0	0	0	0	0	0		0	0	0	0	0	0		0	0	0	0	0	0		0	0	0	0	0	0
255	2023-02-06	1866.2	1866.2	1866.2	1866.2	1866.2	1866.2	1866.2		0	0	0	0	0	0	0	0	0	0	0	0		0	0	0	0	0	0		0	0	0	0	0	0		0	0	0	0	0	0
256	2023-02-03	1862.9	1862.9	1862.9	1862.9	1862.9	1862.9	1862.9		0	0	0	0	0	0	0	0	0	0	0	0		0	0	0	0	0	0		0	0	0	0	0	0		0	0	0	0	0	0
257	2023-02-02	1916.3	1916.3	1916.3	1916.3	1916.3	1916.3	1916.3		0	0	0	0	0	0	0	0	0	0	0	0		0	0	0	0	0	0		0	0	0	0	0	0		0	0	0	0	0	0
258	2023-02-01	1927.8	1927.8	1927.8	1927.8	1927.8	1927.8	1927.8		0	0	0	0	0	0	0	0	0	0	0	0		0	0	0	0	0	0		0	0	0	0	0	0		0	0	0	0	0	0
259	2023-01-31	1929.5	1929.5	1929.5	1929.5	1929.5	1929.5	1929.5		0	0	0	0	0	0	0	0	0	0	0	0		0	0	0	0	0	0		0	0	0	0	0	0		0	0	0	0	0	0
260	2023-01-30	1922.9	1922.9	1922.9	1922.9	1922.9	1922.9	1922.9		0	0	0	0	0	0	0	0	0	0	0	0		0	0	0	0	0	0		0	0	0	0	0	0		0	0	0	0	0	0
261	2023-01-27	1928.6	1928.6	1928.6	1928.6	1928.6	1928.6	1928.6		0	0	0	0	0	0	0	0	0	0	0	0		0	0	0	0	0	0		0	0	0	0	0	0		0	0	0	0	0	0
262	2023-01-26	1929.1	1929.1	1929.1	1929.1	1929.1	1929.1	1929.1		0	0	0	0	0	0	0	0	0	0	0	0		0	0	0	0	0	0		0	0	0	0	0	0		0	0	0	0	0	0
263	2023-01-25	1941.2	1941.2	1941.2	1941.2	1941.2	1941.2	1941.2		0	0	0	0	0	0	0	0	0	0	0	0		0	0	0	0	0	0		0	0	0	0	0	0		0	0	0	0	0	0
264	2023-01-24	1933.9	1933.9	1933.9	1933.9	1933.9	1933.9	1933.9		0	0	0	0	0	0	0	0	0	0	0	0		0	0	0	0	0	0		0	0	0	0	0	0		0	0	0	0	0	0
265	2023-01-23	1927.1	1927.1	1927.1	1927.1	1927.1	1927.1	1927.1		0	0	0	0	0	0	0	0	0	0	0	0		0	0	0	0	0	0		0	0	0	0	0	0		0	0	0	0	0	0
266	2023-01-20	1926.4	1926.4	1926.4	1926.4	1926.4	1926.4	1926.4		0	0	0	0	0	0	0	0	0	0	0	0		0	0	0	0	0	0		0	0	0	0	0	0		0	0	0	0	0	0
267	2023-01-19	1922.1	1922.1	1922.1	1922.1	1922.1	1922.1	1922.1		0	0	0	0	0	0	0	0	0	0	0	0		0	0	0	0	0	0		0	0	0	0	0	0		0	0	0	0	0	0
268	2023-01-18	1904.4	1904.4	1904.4	1904.4	1904.4	1904.4	1904.4		0	0	0	0	0	0	0	0	0	0	0	0		0	0	0	0	0	0		0	0	0	0	0	0		0	0	0	0	0	0
269	2023-01-17	1907.2	1907.2	1907.2	1907.2	1907.2	1907.2	1907.2		0	0	0	0	0	0	0	0	0	0	0	0		0	0	0	0	0	0		0	0	0	0	0	0		0	0	0	0	0	0
270	2023-01-13	1918.4	1918.4	1918.4	1918.4	1918.4	1918.4	1918.4		0	0	0	0	0	0	0	0	0	0	0	0		0	0	0	0	0	0		0	0	0	0	0	0		0	0	0	0	0	0
271	2023-01-12	1895.5	1895.5	1895.5	1895.5	1895.5	1895.5	1895.5		0	0	0	0	0	0	0	0	0	0	0	0		0	0	0	0	0	0		0	0	0	0	0	0		0	0	0	0	0	0
272	2023-01-11	1874.6	1874.6	1874.6	1874.6	1874.6	1874.6	1874.6		0	0	0	0	0	0	0	0	0	0	0	0		0	0	0	0	0	0		0	0	0	0	0	0		0	0	0	0	0	0
273	2023-01-10	1871.6	1871.6	1871.6	1871.6	1871.6	1871.6	1871.6		0	0	0	0	0	0	0	0	0	0	0	0		0	0	0	0	0	0		0	0	0	0	0	0		0	0	0	0	0	0
274	2023-01-09	1872.7	1872.7	1872.7	1872.7	1872.7	1872.7	1872.7		0	0	0	0	0	0	0	0	0	0	0	0		0	0	0	0	0	0		0	0	0	0	0	0		0	0	0	0	0	0
275	2023-01-06	1864.2	1864.2	1864.2	1864.2	1864.2	1864.2	1864.2		0	0	0	0	0	0	0	0	0	0	0	0		0	0	0	0	0	0		0	0	0	0	0	0		0	0	0	0	0	0
276	2023-01-05	1834.8	1834.8	1834.8	1834.8	1834.8	1834.8	1834.8		0	0	0	0	0	0	0	0	0	0	0	0		0	0	0	0	0	0		0	0	0	0	0	0		0	0	0	0	0	0
277	2023-01-04	1852.8	1852.8	1852.8	1852.8	1852.8	1852.8	1852.8		0	0	0	0	0	0	0	0	0	0	0	0		0	0	0	0	0	0		0	0	0	0	0	0		0	0	0	0	0	0
278	2023-01-03	1839.7	1839.7	1839.7	1839.7	1839.7	1839.7	1839.7		0	0	0	0	0	0	0	0	0	0	0	0		0	0	0	0	0	0		0	0	0	0	0	0		0	0	0	0	0	0
279	2022-12-30	1819.7	1109.887	1814.364	1817.867	1817.613	1823.540	1197.134		-709.813	709.813	-5.336	5.336	-1.833	1.833	-2.087	2.087	3.84	3.84	-622.566	622.566		503834	28.4729	3.35989	4.35557	14.7456	387588		0.390071	0.00293235	0.00100731	0.00114689	-0.00211024	0.342126		0.390071	0.00293235	0.00100731	0.00114689	0.00211024	0.342126
280	2022-12-29	1819.5	1819.5	1819.5	1819.5	1819.5	1819.5	1819.5		0	0	0	0	0	0	0	0	0	0	0	0		0	0	0	0	0	0		0	0	0	0	0	0		0	0	0	0	0	0
281	2022-12-28	1807.9	1807.9	1807.9	1807.9	1807.9	1807.9	1807.9		0	0	0	0	0	0	0	0	0	0	0	0		0	0	0	0	0	0		0	0	0	0	0	0		0	0	0	0	0	0
282	2022-12-27	1814.8	1814.8	1814.8	1814.8	1814.8	1814.8	1814.8		0	0	0	0	0	0	0	0	0	0	0	0		0	0	0	0	0	0		0	0	0	0	0	0		0	0	0	0	0	0
283	2022-12-23	1795.9	1795.9	1795.9	1795.9	1795.9	1795.9	1795.9		0	0	0	0	0	0	0	0	0	0	0	0		0	0	0	0	0	0		0	0	0	0	0	0		0	0	0	0	0	0
284	2022-12-22	1787	1787.0	1787.0	1787.0	1787.0	1787.0	1787.0		0	0	0	0	0	0	0	0	0	0	0	0		0	0	0	0	0	0		0	0	0	0	0	0		0	0	0	0	0	0
285	2022-12-21	1815.9	1815.9	1815.9	1815.9	1815.9	1815.9	1815.9		0	0	0	0	0	0	0	0	0	0	0	0		0	0	0	0	0	0		0	0	0	0	0	0		0	0	0	0	0	0
286	2022-12-20	1815.9	1815.9	1815.9	1815.9	1815.9	1815.9	1815.9		0	0	0	0	0	0	0	0	0	0	0	0		0	0	0	0	0	0		0	0	0	0	0	0		0	0	0	0	0	0
287	2022-12-19	1787.7	1787.7	1787.7	1787.7	1787.7	1787.7	1787.7		0	0	0	0	0	0	0	0	0	0	0	0		0	0	0	0	0	0		0	0	0	0	0	0		0	0	0	0	0	0
288	2022-12-16	1790	1790.0	1790.0	1790.0	1790.0	1790.0	1790.0		0	0	0	0	0	0	0	0	0	0	0	0		0	0	0	0	0	0		0	0	0	0	0	0		0	0	0	0	0	0
289	2022-12-15	1777.2	1777.2	1777.2	1777.2	1777.2	1777.2	1777.2		0	0	0	0	0	0	0	0	0	0	0	0		0	0	0	0	0	0		0	0	0	0	0	0		0	0	0	0	0	0
290	2022-12-14	1807.5	1807.5	1807.5	1807.5	1807.5	1807.5	1807.5		0	0	0	0	0	0	0	0	0	0	0	0		0	0	0	0	0	0		0	0	0	0	0	0		0	0	0	0	0	0
291	2022-12-13	1813.9	1813.9	1813.9	1813.9	1813.9	1813.9	1813.9		0	0	0	0	0	0	0	0	0	0	0	0		0	0	0	0	0	0		0	0	0	0	0	0		0	0	0	0	0	0
292	2022-12-12	1780.5	1780.5	1780.5	1780.5	1780.5	1780.5	1780.5		0	0	0	0	0	0	0	0	0	0	0	0		0	0	0	0	0	0		0	0	0	0	0	0		0	0	0	0	0	0
293	2022-12-09	1798.1	1798.1	1798.1	1798.1	1798.1	1798.1	1798.1		0	0	0	0	0	0	0	0	0	0	0	0		0	0	0	0	0	0		0	0	0	0	0	0		0	0	0	0	0	0
294	2022-12-08	1788.7	1788.7	1788.7	1788.7	1788.7	1788.7	1788.7		0	0	0	0	0	0	0	0	0	0	0	0		0	0	0	0	0	0		0	0	0	0	0	0		0	0	0	0	0	0
295	2022-12-07	1785.5	1109.887	1779.477	1787.433	1786.188	1779.0	1192.470		-675.613	675.613	-6.023	6.023	1.933	1.933	0.688	0.688	-6.5	6.5	-593.03	593.03		456453	36.2765	3.73649	0.473344	42.25	351685		0.378389	0.00337328	-0.00108261	-0.000385326	0.00364044	0.332137		0.378389	0.00337328	0.00108261	0.000385326	0.00364044	0.332137
296	2022-12-06	1769.3	1769.3	1769.3	1769.3	1769.3	1769.3	1769.3		0	0	0	0	0	0	0	0	0	0	0	0		0	0	0	0	0	0		0	0	0	0	0	0		0	0	0	0	0	0
297	2022-12-05	1767.4	1767.4	1767.4	1767.4	1767.4	1767.4	1767.4		0	0	0	0	0	0	0	0	0	0	0	0		0	0	0	0	0	0		0	0	0	0	0	0		0	0	0	0	0	0
298	2022-12-02	1795.9	1109.887	1792.489	1781.167	1788.588	1792.675	1194.542		-686.013	686.013	-3.411	3.411	-14.733	14.733	-7.312	7.312	-3.225	3.225	-601.358	601.358		470614	11.6349	217.061	53.4653	10.4006	361631		0.381988	0.00189933	0.00820369	0.0040715	0.00179576	0.33485		0.381988	0.00189933	0.00820369	0.0040715	0.00179576	0.33485
299	2022-12-01	1801.1	1801.1	1801.1	1801.1	1801.1	1801.1	1801.1		0	0	0	0	0	0	0	0	0	0	0	0		0	0	0	0	0	0		0	0	0	0	0	0		0	0	0	0	0	0
300	2022-11-30	1746	1746.0	1746.0	1746.0	1746.0	1746.0	1746.0		0	0	0	0	0	0	0	0	0	0	0	0		0	0	0	0	0	0		0	0	0	0	0	0		0	0	0	0	0	0
301	2022-11-29	1748.4	1748.4	1748.4	1748.4	1748.4	1748.4	1748.4		0	0	0	0	0	0	0	0	0	0	0	0		0	0	0	0	0	0		0	0	0	0	0	0		0	0	0	0	0	0
302	2022-11-28	1740.1	1740.1	1740.1	1740.1	1740.1	1740.1	1740.1		0	0	0	0	0	0	0	0	0	0	0	0		0	0	0	0	0	0		0	0	0	0	0	0		0	0	0	0	0	0
303	2022-11-25	1753.3	1109.887	1752.725	1753.133	1752.320	1742.980	1189.737		-643.413	643.413	-0.575	0.575	-0.167	0.167	-0.98	0.98	-10.32	10.32	-563.563	563.563		413980	0.330625	0.027889	0.9604	106.502	317603		0.366973	0.000327953	9.5249e-05	0.000558946	0.00588604	0.32143		0.366973	0.000327953	9.5249e-05	0.000558946	0.00588604	0.32143
304	2022-11-23	1744.9	1744.9	1744.9	1744.9	1744.9	1744.9	1744.9		0	0	0	0	0	0	0	0	0	0	0	0		0	0	0	0	0	0		0	0	0	0	0	0		0	0	0	0	0	0
305	2022-11-22	1738.3	1738.3	1738.3	1738.3	1738.3	1738.3	1738.3		0	0	0	0	0	0	0	0	0	0	0	0		0	0	0	0	0	0		0	0	0	0	0	0		0	0	0	0	0	0
306	2022-11-21	1737.4	1737.4	1737.4	1737.4	1737.4	1737.4	1737.4		0	0	0	0	0	0	0	0	0	0	0	0		0	0	0	0	0	0		0	0	0	0	0	0		0	0	0	0	0	0
307	2022-11-18	1751.9	1751.9	1751.9	1751.9	1751.9	1751.9	1751.9		0	0	0	0	0	0	0	0	0	0	0	0		0	0	0	0	0	0		0	0	0	0	0	0		0	0	0	0	0	0
308	2022-11-17	1760.8	1760.8	1760.8	1760.8	1760.8	1760.8	1760.8		0	0	0	0	0	0	0	0	0	0	0	0		0	0	0	0	0	0		0	0	0	0	0	0		0	0	0	0	0	0
309	2022-11-16	1773	1773.0	1773.0	1773.0	1773.0	1773.0	1773.0		0	0	0	0	0	0	0	0	0	0	0	0		0	0	0	0	0	0		0	0	0	0	0	0		0	0	0	0	0	0
310	2022-11-15	1773.8	1773.8	1773.8	1773.8	1773.8	1773.8	1773.8		0	0	0	0	0	0	0	0	0	0	0	0		0	0	0	0	0	0		0	0	0	0	0	0		0	0	0	0	0	0
311	2022-11-14	1773.6	1773.6	1773.6	1773.6	1773.6	1773.6	1773.6		0	0	0	0	0	0	0	0	0	0	0	0		0	0	0	0	0	0		0	0	0	0	0	0		0	0	0	0	0	0
312	2022-11-11	1766	1766.0	1766.0	1766.0	1766.0	1766.0	1766.0		0	0	0	0	0	0	0	0	0	0	0	0		0	0	0	0	0	0		0	0	0	0	0	0		0	0	0	0	0	0
313	2022-11-10	1750.3	1750.3	1750.3	1750.3	1750.3	1750.3	1750.3		0	0	0	0	0	0	0	0	0	0	0	0		0	0	0	0	0	0		0	0	0	0	0	0		0	0	0	0	0	0
314	2022-11-09	1710.1	1710.1	1710.1	1710.1	1710.1	1710.1	1710.1		0	0	0	0	0	0	0	0	0	0	0	0		0	0	0	0	0	0		0	0	0	0	0	0		0	0	0	0	0	0
315	2022-11-08	1712.1	1712.1	1712.1	1712.1	1712.1	1712.1	1712.1		0	0	0	0	0	0	0	0	0	0	0	0		0	0	0	0	0	0		0	0	0	0	0	0		0	0	0	0	0	0
316	2022-11-07	1676.5	1676.5	1676.5	1676.5	1676.5	1676.5	1676.5		0	0	0	0	0	0	0	0	0	0	0	0		0	0	0	0	0	0		0	0	0	0	0	0		0	0	0	0	0	0
317	2022-11-03	1672.5	1672.5	1672.5	1672.5	1672.5	1672.5	1672.5		0	0	0	0	0	0	0	0	0	0	0	0		0	0	0	0	0	0		0	0	0	0	0	0		0	0	0	0	0	0
318	2022-11-02	1627.3	1109.887	1616.912	1620.5	1622.192	1659.1	1172.808		-517.413	517.413	-10.388	10.388	-6.8	6.8	-5.108	5.108	31.8	31.8	-454.492	454.492		267716	107.911	46.24	26.0917	1011.24	206563		0.317958	0.00638358	0.0041787	0.00313894	-0.0195416	0.279292		0.317958	0.00638358	0.0041787	0.00313894	0.0195416	0.279292
319	2022-11-01	1645.7	1645.7	1645.7	1645.7	1645.7	1645.7	1645.7		0	0	0	0	0	0	0	0	0	0	0	0		0	0	0	0	0	0		0	0	0	0	0	0		0	0	0	0	0	0
320	2022-10-31	1645	1645.0	1645.0	1645.0	1645.0	1645.0	1645.0		0	0	0	0	0	0	0	0	0	0	0	0		0	0	0	0	0	0		0	0	0	0	0	0		0	0	0	0	0	0
321	2022-10-30	1635.9	1635.9	1635.9	1635.9	1635.9	1635.9	1635.9		0	0	0	0	0	0	0	0	0	0	0	0		0	0	0	0	0	0		0	0	0	0	0	0		0	0	0	0	0	0
322	2022-10-27	1639.6	1639.6	1639.6	1639.6	1639.6	1639.6	1639.6		0	0	0	0	0	0	0	0	0	0	0	0		0	0	0	0	0	0		0	0	0	0	0	0		0	0	0	0	0	0
323	2022-10-26	1660.7	1660.7	1660.7	1660.7	1660.7	1660.7	1660.7		0	0	0	0	0	0	0	0	0	0	0	0		0	0	0	0	0	0		0	0	0	0	0	0		0	0	0	0	0	0
324	2022-10-25	1664	1664.0	1664.0	1664.0	1664.0	1664.0	1664.0		0	0	0	0	0	0	0	0	0	0	0	0		0	0	0	0	0	0		0	0	0	0	0	0		0	0	0	0	0	0
325	2022-10-24	1652.8	1652.8	1652.8	1652.8	1652.8	1652.8	1652.8		0	0	0	0	0	0	0	0	0	0	0	0		0	0	0	0	0	0		0	0	0	0	0	0		0	0	0	0	0	0
326	2022-10-23	1648.7	1648.7	1648.7	1648.7	1648.7	1648.7	1648.7		0	0	0	0	0	0	0	0	0	0	0	0		0	0	0	0	0	0		0	0	0	0	0	0		0	0	0	0	0	0
327	2022-10-20	1651	1651.0	1651.0	1651.0	1651.0	1651.0	1651.0		0	0	0	0	0	0	0	0	0	0	0	0		0	0	0	0	0	0		0	0	0	0	0	0		0	0	0	0	0	0
328	2022-10-19	1630.8	1630.8	1630.8	1630.8	1630.8	1630.8	1630.8		0	0	0	0	0	0	0	0	0	0	0	0		0	0	0	0	0	0		0	0	0	0	0	0		0	0	0	0	0	0
329	2022-10-18	1627.5	1627.5	1627.5	1627.5	1627.5	1627.5	1627.5		0	0	0	0	0	0	0	0	0	0	0	0		0	0	0	0	0	0		0	0	0	0	0	0		0	0	0	0	0	0
330	2022-10-17	1649	1649.0	1649.0	1649.0	1649.0	1649.0	1649.0		0	0	0	0	0	0	0	0	0	0	0	0		0	0	0	0	0	0		0	0	0	0	0	0		0	0	0	0	0	0
331	2022-10-16	1657	1657.0	1657.0	1657.0	1657.0	1657.0	1657.0		0	0	0	0	0	0	0	0	0	0	0	0		0	0	0	0	0	0		0	0	0	0	0	0		0	0	0	0	0	0
332	2022-10-13	1641.7	1641.7	1641.7	1641.7	1641.7	1641.7	1641.7		0	0	0	0	0	0	0	0	0	0	0	0		0	0	0	0	0	0		0	0	0	0	0	0		0	0	0	0	0	0
333	2022-10-12	1670	1670.0	1670.0	1670.0	1670.0	1670.0	1670.0		0	0	0	0	0	0	0	0	0	0	0	0		0	0	0	0	0	0		0	0	0	0	0	0		0	0	0	0	0	0
334	2022-10-11	1670.3	1670.3	1670.3	1670.3	1670.3	1670.3	1670.3		0	0	0	0	0	0	0	0	0	0	0	0		0	0	0	0	0	0		0	0	0	0	0	0		0	0	0	0	0	0
335	2022-10-10	1678.7	1678.7	1678.7	1678.7	1678.7	1678.7	1678.7		0	0	0	0	0	0	0	0	0	0	0	0		0	0	0	0	0	0		0	0	0	0	0	0		0	0	0	0	0	0
336	2022-10-09	1667.3	1667.3	1667.3	1667.3	1667.3	1667.3	1667.3		0	0	0	0	0	0	0	0	0	0	0	0		0	0	0	0	0	0		0	0	0	0	0	0		0	0	0	0	0	0
337	2022-10-06	1700.5	1700.5	1700.5	1700.5	1700.5	1700.5	1700.5		0	0	0	0	0	0	0	0	0	0	0	0		0	0	0	0	0	0		0	0	0	0	0	0		0	0	0	0	0	0
338	2022-10-05	1711.7	1711.7	1711.7	1711.7	1711.7	1711.7	1711.7		0	0	0	0	0	0	0	0	0	0	0	0		0	0	0	0	0	0		0	0	0	0	0	0		0	0	0	0	0	0
339	2022-10-04	1711.4	1711.4	1711.4	1711.4	1711.4	1711.4	1711.4		0	0	0	0	0	0	0	0	0	0	0	0		0	0	0	0	0	0		0	0	0	0	0	0		0	0	0	0	0	0
340	2022-10-03	1721.1	1721.1	1721.1	1721.1	1721.1	1721.1	1721.1		0	0	0	0	0	0	0	0	0	0	0	0		0	0	0	0	0	0		0	0	0	0	0	0		0	0	0	0	0	0
341	2022-10-02	1692.9	1692.9	1692.9	1692.9	1692.9	1692.9	1692.9		0	0	0	0	0	0	0	0	0	0	0	0		0	0	0	0	0	0		0	0	0	0	0	0		0	0	0	0	0	0
342	2022-09-29	1662.4	1662.4	1662.4	1662.4	1662.4	1662.4	1662.4		0	0	0	0	0	0	0	0	0	0	0	0		0	0	0	0	0	0		0	0	0	0	0	0		0	0	0	0	0	0
343	2022-09-28	1658.5	1658.5	1658.5	1658.5	1658.5	1658.5	1658.5		0	0	0	0	0	0	0	0	0	0	0	0		0	0	0	0	0	0		0	0	0	0	0	0		0	0	0	0	0	0
344	2022-09-27	1660.4	1660.4	1660.4	1660.4	1660.4	1660.4	1660.4		0	0	0	0	0	0	0	0	0	0	0	0		0	0	0	0	0	0		0	0	0	0	0	0		0	0	0	0	0	0
345	2022-09-26	1626.7	1626.7	1626.7	1626.7	1626.7	1626.7	1626.7		0	0	0	0	0	0	0	0	0	0	0	0		0	0	0	0	0	0		0	0	0	0	0	0		0	0	0	0	0	0
346	2022-09-25	1623.3	1623.3	1623.3	1623.3	1623.3	1623.3	1623.3		0	0	0	0	0	0	0	0	0	0	0	0		0	0	0	0	0	0		0	0	0	0	0	0		0	0	0	0	0	0
347	2022-09-22	1645.3	1645.3	1645.3	1645.3	1645.3	1645.3	1645.3		0	0	0	0	0	0	0	0	0	0	0	0		0	0	0	0	0	0		0	0	0	0	0	0		0	0	0	0	0	0
348	2022-09-21	1670.8	1109.887	1665.143	1669.667	1671.928	1654.950	1178.832		-560.913	560.913	-5.657	5.657	-1.133	1.133	1.128	1.128	-15.85	15.85	-491.968	491.968		314623	32.0016	1.28369	1.27238	251.222	242033		0.335715	0.0033858	0.000678118	-0.000675126	0.00948647	0.294451		0.335715	0.0033858	0.000678118	0.000675126	0.00948647	0.294451
349	2022-09-20	1664.6	1664.6	1664.6	1664.6	1664.6	1664.6	1664.6		0	0	0	0	0	0	0	0	0	0	0	0		0	0	0	0	0	0		0	0	0	0	0	0		0	0	0	0	0	0
350	2022-09-19	1659.7	1659.7	1659.7	1659.7	1659.7	1659.7	1659.7		0	0	0	0	0	0	0	0	0	0	0	0		0	0	0	0	0	0		0	0	0	0	0	0		0	0	0	0	0	0
351	2022-09-18	1666.2	1666.2	1666.2	1666.2	1666.2	1666.2	1666.2		0	0	0	0	0	0	0	0	0	0	0	0		0	0	0	0	0	0		0	0	0	0	0	0		0	0	0	0	0	0
352	2022-09-15	1671.7	1671.7	1671.7	1671.7	1671.7	1671.7	1671.7		0	0	0	0	0	0	0	0	0	0	0	0		0	0	0	0	0	0		0	0	0	0	0	0		0	0	0	0	0	0
353	2022-09-14	1665.4	1665.4	1665.4	1665.4	1665.4	1665.4	1665.4		0	0	0	0	0	0	0	0	0	0	0	0		0	0	0	0	0	0		0	0	0	0	0	0		0	0	0	0	0	0
354	2022-09-13	1696.5	1696.5	1696.5	1696.5	1696.5	1696.5	1696.5		0	0	0	0	0	0	0	0	0	0	0	0		0	0	0	0	0	0		0	0	0	0	0	0		0	0	0	0	0	0
355	2022-09-12	1705	1109.887	1702.878	1703.733	1704.799	1712.3	1184.597		-595.113	595.113	-2.122	2.122	-1.267	1.267	-0.201	0.201	7.3	7.3	-520.403	520.403		354159	4.50288	1.60529	0.040401	53.29	270819		0.34904	0.00124457	0.000743109	0.000117889	-0.00428152	0.305222		0.34904	0.00124457	0.000743109	0.000117889	0.00428152	0.305222
356	2022-09-11	1728.1	1728.1	1728.1	1728.1	1728.1	1728.1	1728.1		0	0	0	0	0	0	0	0	0	0	0	0		0	0	0	0	0	0		0	0	0	0	0	0		0	0	0	0	0	0
357	2022-09-08	1716.2	1716.2	1716.2	1716.2	1716.2	1716.2	1716.2		0	0	0	0	0	0	0	0	0	0	0	0		0	0	0	0	0	0		0	0	0	0	0	0		0	0	0	0	0	0
358	2022-09-07	1708	1708.0	1708.0	1708.0	1708.0	1708.0	1708.0		0	0	0	0	0	0	0	0	0	0	0	0		0	0	0	0	0	0		0	0	0	0	0	0		0	0	0	0	0	0
359	2022-09-06	1715.3	1715.3	1715.3	1715.3	1715.3	1715.3	1715.3		0	0	0	0	0	0	0	0	0	0	0	0		0	0	0	0	0	0		0	0	0	0	0	0		0	0	0	0	0	0
360	2022-09-05	1700.4	1700.4	1700.4	1700.4	1700.4	1700.4	1700.4		0	0	0	0	0	0	0	0	0	0	0	0		0	0	0	0	0	0		0	0	0	0	0	0		0	0	0	0	0	0
361	2022-09-01	1709.8	1709.8	1709.8	1709.8	1709.8	1709.8	1709.8		0	0	0	0	0	0	0	0	0	0	0	0		0	0	0	0	0	0		0	0	0	0	0	0		0	0	0	0	0	0
362	2022-08-31	1696.6	1696.6	1696.6	1696.6	1696.6	1696.6	1696.6		0	0	0	0	0	0	0	0	0	0	0	0		0	0	0	0	0	0		0	0	0	0	0	0		0	0	0	0	0	0
363	2022-08-30	1712.8	1712.8	1712.8	1712.8	1712.8	1712.8	1712.8		0	0	0	0	0	0	0	0	0	0	0	0		0	0	0	0	0	0		0	0	0	0	0	0		0	0	0	0	0	0
364	2022-08-29	1723.2	1109.887	1727.422	1725.7	1725.599	1724.7	1187.077		-613.313	613.313	4.222	4.222	2.5	2.5	2.399	2.399	1.5	1.5	-536.123	536.123		376153	17.8253	6.25	5.7552	2.25	287428		0.355915	-0.00245009	-0.00145079	-0.00139218	-0.000870474	0.311121		0.355915	0.00245009	0.00145079	0.00139218	0.000870474	0.311121
365	2022-08-28	1736.6	1736.6	1736.6	1736.6	1736.6	1736.6	1736.6		0	0	0	0	0	0	0	0	0	0	0	0		0	0	0	0	0	0		0	0	0	0	0	0		0	0	0	0	0	0
366	2022-08-25	1736.1	1736.1	1736.1	1736.1	1736.1	1736.1	1736.1		0	0	0	0	0	0	0	0	0	0	0	0		0	0	0	0	0	0		0	0	0	0	0	0		0	0	0	0	0	0
367	2022-08-24	1757.7	1757.7	1757.7	1757.7	1757.7	1757.7	1757.7		0	0	0	0	0	0	0	0	0	0	0	0		0	0	0	0	0	0		0	0	0	0	0	0		0	0	0	0	0	0
368	2022-08-23	1747.8	1747.8	1747.8	1747.8	1747.8	1747.8	1747.8		0	0	0	0	0	0	0	0	0	0	0	0		0	0	0	0	0	0		0	0	0	0	0	0		0	0	0	0	0	0
369	2022-08-22	1746.8	1746.8	1746.8	1746.8	1746.8	1746.8	1746.8		0	0	0	0	0	0	0	0	0	0	0	0		0	0	0	0	0	0		0	0	0	0	0	0		0	0	0	0	0	0
370	2022-08-21	1734	1734.0	1734.0	1734.0	1734.0	1734.0	1734.0		0	0	0	0	0	0	0	0	0	0	0	0		0	0	0	0	0	0		0	0	0	0	0	0		0	0	0	0	0	0
371	2022-08-18	1747.6	1747.6	1747.6	1747.6	1747.6	1747.6	1747.6		0	0	0	0	0	0	0	0	0	0	0	0		0	0	0	0	0	0		0	0	0	0	0	0		0	0	0	0	0	0
372	2022-08-17	1755.3	1755.3	1755.3	1755.3	1755.3	1755.3	1755.3		0	0	0	0	0	0	0	0	0	0	0	0		0	0	0	0	0	0		0	0	0	0	0	0		0	0	0	0	0	0
373	2022-08-16	1760.3	1760.3	1760.3	1760.3	1760.3	1760.3	1760.3		0	0	0	0	0	0	0	0	0	0	0	0		0	0	0	0	0	0		0	0	0	0	0	0		0	0	0	0	0	0
374	2022-08-15	1773.2	1773.2	1773.2	1773.2	1773.2	1773.2	1773.2		0	0	0	0	0	0	0	0	0	0	0	0		0	0	0	0	0	0		0	0	0	0	0	0		0	0	0	0	0	0
375	2022-08-14	1781.4	1781.4	1781.4	1781.4	1781.4	1781.4	1781.4		0	0	0	0	0	0	0	0	0	0	0	0		0	0	0	0	0	0		0	0	0	0	0	0		0	0	0	0	0	0
376	2022-08-11	1798.6	1798.6	1798.6	1798.6	1798.6	1798.6	1798.6		0	0	0	0	0	0	0	0	0	0	0	0		0	0	0	0	0	0		0	0	0	0	0	0		0	0	0	0	0	0
377	2022-08-10	1789.7	1789.7	1789.7	1789.7	1789.7	1789.7	1789.7		0	0	0	0	0	0	0	0	0	0	0	0		0	0	0	0	0	0		0	0	0	0	0	0		0	0	0	0	0	0
378	2022-08-09	1795.6	1795.6	1795.6	1795.6	1795.6	1795.6	1795.6		0	0	0	0	0	0	0	0	0	0	0	0		0	0	0	0	0	0		0	0	0	0	0	0		0	0	0	0	0	0
379	2022-08-08	1794	1794.0	1794.0	1794.0	1794.0	1794.0	1794.0		0	0	0	0	0	0	0	0	0	0	0	0		0	0	0	0	0	0		0	0	0	0	0	0		0	0	0	0	0	0
380	2022-08-07	1786.8	1786.8	1786.8	1786.8	1786.8	1786.8	1786.8		0	0	0	0	0	0	0	0	0	0	0	0		0	0	0	0	0	0		0	0	0	0	0	0		0	0	0	0	0	0
381	2022-08-04	1772.9	1772.9	1772.9	1772.9	1772.9	1772.9	1772.9		0	0	0	0	0	0	0	0	0	0	0	0		0	0	0	0	0	0		0	0	0	0	0	0		0	0	0	0	0	0
382	2022-08-03	1788.5	1788.5	1788.5	1788.5	1788.5	1788.5	1788.5		0	0	0	0	0	0	0	0	0	0	0	0		0	0	0	0	0	0		0	0	0	0	0	0		0	0	0	0	0	0
383	2022-08-02	1758	1758.0	1758.0	1758.0	1758.0	1758.0	1758.0		0	0	0	0	0	0	0	0	0	0	0	0		0	0	0	0	0	0		0	0	0	0	0	0		0	0	0	0	0	0
384	2022-08-01	1771.1	1771.1	1771.1	1771.1	1771.1	1771.1	1771.1		0	0	0	0	0	0	0	0	0	0	0	0		0	0	0	0	0	0		0	0	0	0	0	0		0	0	0	0	0	0
385	2022-07-31	1769	1769.0	1769.0	1769.0	1769.0	1769.0	1769.0		0	0	0	0	0	0	0	0	0	0	0	0		0	0	0	0	0	0		0	0	0	0	0	0		0	0	0	0	0	0
386	2022-07-28	1762.9	1762.9	1762.9	1762.9	1762.9	1762.9	1762.9		0	0	0	0	0	0	0	0	0	0	0	0		0	0	0	0	0	0		0	0	0	0	0	0		0	0	0	0	0	0
387	2022-07-27	1750.3	1109.887	1742.378	1755.067	1748.553	1741.0	1188.047		-640.413	640.413	-7.922	7.922	4.767	4.767	-1.747	1.747	-9.3	9.3	-562.253	562.253		410129	62.7581	22.7243	3.05201	86.49	316128		0.365888	0.00452608	-0.00272353	0.000998115	0.00531337	0.321232		0.365888	0.00452608	0.00272353	0.000998115	0.00531337	0.321232
388	2022-07-26	1719.1	1719.1	1719.1	1719.1	1719.1	1719.1	1719.1		0	0	0	0	0	0	0	0	0	0	0	0		0	0	0	0	0	0		0	0	0	0	0	0		0	0	0	0	0	0
389	2022-07-25	1717.7	1717.7	1717.7	1717.7	1717.7	1717.7	1717.7		0	0	0	0	0	0	0	0	0	0	0	0		0	0	0	0	0	0		0	0	0	0	0	0		0	0	0	0	0	0
390	2022-07-24	1719	1719.0	1719.0	1719.0	1719.0	1719.0	1719.0		0	0	0	0	0	0	0	0	0	0	0	0		0	0	0	0	0	0		0	0	0	0	0	0		0	0	0	0	0	0
391	2022-07-21	1727.1	1727.1	1727.1	1727.1	1727.1	1727.1	1727.1		0	0	0	0	0	0	0	0	0	0	0	0		0	0	0	0	0	0		0	0	0	0	0	0		0	0	0	0	0	0
392	2022-07-20	1712.7	1712.7	1712.7	1712.7	1712.7	1712.7	1712.7		0	0	0	0	0	0	0	0	0	0	0	0		0	0	0	0	0	0		0	0	0	0	0	0		0	0	0	0	0	0
393	2022-07-19	1699.5	1699.5	1699.5	1699.5	1699.5	1699.5	1699.5		0	0	0	0	0	0	0	0	0	0	0	0		0	0	0	0	0	0		0	0	0	0	0	0		0	0	0	0	0	0
394	2022-07-18	1710	1710.0	1710.0	1710.0	1710.0	1710.0	1710.0		0	0	0	0	0	0	0	0	0	0	0	0		0	0	0	0	0	0		0	0	0	0	0	0		0	0	0	0	0	0
395	2022-07-17	1709.2	1709.2	1709.2	1709.2	1709.2	1709.2	1709.2		0	0	0	0	0	0	0	0	0	0	0	0		0	0	0	0	0	0		0	0	0	0	0	0		0	0	0	0	0	0
396	2022-07-14	1702.4	1702.4	1702.4	1702.4	1702.4	1702.4	1702.4		0	0	0	0	0	0	0	0	0	0	0	0		0	0	0	0	0	0		0	0	0	0	0	0		0	0	0	0	0	0
397	2022-07-13	1704.5	1109.887	1708.639	1708.633	1708.580	1718.3	1184.043		-594.613	594.613	4.139	4.139	4.133	4.133	4.08	4.08	13.8	13.8	-520.457	520.457		353565	17.1313	17.0817	16.6464	190.44	270875		0.348849	-0.00242828	-0.00242476	-0.00239366	-0.00809622	0.305343		0.348849	0.00242828	0.00242476	0.00239366	0.00809622	0.305343
398	2022-07-12	1734.2	1734.2	1734.2	1734.2	1734.2	1734.2	1734.2		0	0	0	0	0	0	0	0	0	0	0	0		0	0	0	0	0	0		0	0	0	0	0	0		0	0	0	0	0	0
399	2022-07-11	1723.3	1723.3	1723.3	1723.3	1723.3	1723.3	1723.3		0	0	0	0	0	0	0	0	0	0	0	0		0	0	0	0	0	0		0	0	0	0	0	0		0	0	0	0	0	0
400	2022-07-10	1730	1109.887	1737.069	1730.8	1732.110	1727.625	1187.211		-620.113	620.113	7.069	7.069	0.8	0.8	2.11	2.11	-2.375	2.375	-542.789	542.789		384540	49.9708	0.64	4.4521	5.64062	294620		0.358447	-0.00408613	-0.000462428	-0.00121965	0.00137283	0.313751		0.358447	0.00408613	0.000462428	0.00121965	0.00137283	0.313751
401	2022-07-07	1740.6	1740.6	1740.6	1740.6	1740.6	1740.6	1740.6		0	0	0	0	0	0	0	0	0	0	0	0		0	0	0	0	0	0		0	0	0	0	0	0		0	0	0	0	0	0
402	2022-07-06	1737.9	1737.9	1737.9	1737.9	1737.9	1737.9	1737.9		0	0	0	0	0	0	0	0	0	0	0	0		0	0	0	0	0	0		0	0	0	0	0	0		0	0	0	0	0	0
403	2022-07-05	1734.9	1734.9	1734.9	1734.9	1734.9	1734.9	1734.9		0	0	0	0	0	0	0	0	0	0	0	0		0	0	0	0	0	0		0	0	0	0	0	0		0	0	0	0	0	0
404	2022-07-04	1761.8	1761.8	1761.8	1761.8	1761.8	1761.8	1761.8		0	0	0	0	0	0	0	0	0	0	0	0		0	0	0	0	0	0		0	0	0	0	0	0		0	0	0	0	0	0
405	2022-06-30	1798.9	1798.9	1798.9	1798.9	1798.9	1798.9	1798.9		0	0	0	0	0	0	0	0	0	0	0	0		0	0	0	0	0	0		0	0	0	0	0	0		0	0	0	0	0	0
406	2022-06-29	1804.1	1109.887	1816.329	1812.567	1814.256	1806.3	1196.154		-694.213	694.213	12.229	12.229	8.467	8.467	10.156	10.156	2.2	2.2	-607.946	607.946		481932	149.548	71.6901	103.144	4.84	369598		0.384797	-0.00677845	-0.0046932	-0.0056294	-0.00121944	0.33698		0.384797	0.00677845	0.0046932	0.0056294	0.00121944	0.33698
407	2022-06-28	1813.7	1813.7	1813.7	1813.7	1813.7	1813.7	1813.7		0	0	0	0	0	0	0	0	0	0	0	0		0	0	0	0	0	0		0	0	0	0	0	0		0	0	0	0	0	0
408	2022-06-27	1817.5	1817.5	1817.5	1817.5	1817.5	1817.5	1817.5		0	0	0	0	0	0	0	0	0	0	0	0		0	0	0	0	0	0		0	0	0	0	0	0		0	0	0	0	0	0
409	2022-06-26	1820.9	1820.9	1820.9	1820.9	1820.9	1820.9	1820.9		0	0	0	0	0	0	0	0	0	0	0	0		0	0	0	0	0	0		0	0	0	0	0	0		0	0	0	0	0	0
410	2022-06-23	1826.5	1826.5	1826.5	1826.5	1826.5	1826.5	1826.5		0	0	0	0	0	0	0	0	0	0	0	0		0	0	0	0	0	0		0	0	0	0	0	0		0	0	0	0	0	0
411	2022-06-22	1825.7	1825.7	1825.7	1825.7	1825.7	1825.7	1825.7		0	0	0	0	0	0	0	0	0	0	0	0		0	0	0	0	0	0		0	0	0	0	0	0		0	0	0	0	0	0
412	2022-06-21	1834.3	1834.3	1834.3	1834.3	1834.3	1834.3	1834.3		0	0	0	0	0	0	0	0	0	0	0	0		0	0	0	0	0	0		0	0	0	0	0	0		0	0	0	0	0	0
413	2022-06-20	1834.6	1834.6	1834.6	1834.6	1834.6	1834.6	1834.6		0	0	0	0	0	0	0	0	0	0	0	0		0	0	0	0	0	0		0	0	0	0	0	0		0	0	0	0	0	0
414	2022-06-16	1835.6	1109.887	1840.436	1838.9	1838.878	1843.480	1199.886		-725.713	725.713	4.836	4.836	3.3	3.3	3.278	3.278	7.88	7.88	-635.714	635.714		526659	23.3869	10.89	10.7453	62.0944	404132		0.395355	-0.00263456	-0.00179778	-0.00178579	-0.00429287	0.346325		0.395355	0.00263456	0.00179778	0.00178579	0.00429287	0.346325
415	2022-06-15	1845.7	1845.7	1845.7	1845.7	1845.7	1845.7	1845.7		0	0	0	0	0	0	0	0	0	0	0	0		0	0	0	0	0	0		0	0	0	0	0	0		0	0	0	0	0	0
416	2022-06-14	1815.3	1815.3	1815.3	1815.3	1815.3	1815.3	1815.3		0	0	0	0	0	0	0	0	0	0	0	0		0	0	0	0	0	0		0	0	0	0	0	0		0	0	0	0	0	0
417	2022-06-13	1809.5	1809.5	1809.5	1809.5	1809.5	1809.5	1809.5		0	0	0	0	0	0	0	0	0	0	0	0		0	0	0	0	0	0		0	0	0	0	0	0		0	0	0	0	0	0
418	2022-06-12	1828	1828.0	1828.0	1828.0	1828.0	1828.0	1828.0		0	0	0	0	0	0	0	0	0	0	0	0		0	0	0	0	0	0		0	0	0	0	0	0		0	0	0	0	0	0
419	2022-06-09	1871.5	1871.5	1871.5	1871.5	1871.5	1871.5	1871.5		0	0	0	0	0	0	0	0	0	0	0	0		0	0	0	0	0	0		0	0	0	0	0	0		0	0	0	0	0	0
420	2022-06-08	1848.8	1848.8	1848.8	1848.8	1848.8	1848.8	1848.8		0	0	0	0	0	0	0	0	0	0	0	0		0	0	0	0	0	0		0	0	0	0	0	0		0	0	0	0	0	0
421	2022-06-07	1851.9	1851.9	1851.9	1851.9	1851.9	1851.9	1851.9		0	0	0	0	0	0	0	0	0	0	0	0		0	0	0	0	0	0		0	0	0	0	0	0		0	0	0	0	0	0
422	2022-06-06	1847.5	1847.5	1847.5	1847.5	1847.5	1847.5	1847.5		0	0	0	0	0	0	0	0	0	0	0	0		0	0	0	0	0	0		0	0	0	0	0	0		0	0	0	0	0	0
423	2022-06-05	1839.2	1839.2	1839.2	1839.2	1839.2	1839.2	1839.2		0	0	0	0	0	0	0	0	0	0	0	0		0	0	0	0	0	0		0	0	0	0	0	0		0	0	0	0	0	0
424	2022-06-02	1845.4	1845.4	1845.4	1845.4	1845.4	1845.4	1845.4		0	0	0	0	0	0	0	0	0	0	0	0		0	0	0	0	0	0		0	0	0	0	0	0		0	0	0	0	0	0
425	2022-06-01	1866.5	1866.5	1866.5	1866.5	1866.5	1866.5	1866.5		0	0	0	0	0	0	0	0	0	0	0	0		0	0	0	0	0	0		0	0	0	0	0	0		0	0	0	0	0	0
426	2022-05-31	1843.3	1843.3	1843.3	1843.3	1843.3	1843.3	1843.3		0	0	0	0	0	0	0	0	0	0	0	0		0	0	0	0	0	0		0	0	0	0	0	0		0	0	0	0	0	0
427	2022-05-30	1842.7	1842.7	1842.7	1842.7	1842.7	1842.7	1842.7		0	0	0	0	0	0	0	0	0	0	0	0		0	0	0	0	0	0		0	0	0	0	0	0		0	0	0	0	0	0
428	2022-05-26	1851.3	1851.3	1851.3	1851.3	1851.3	1851.3	1851.3		0	0	0	0	0	0	0	0	0	0	0	0		0	0	0	0	0	0		0	0	0	0	0	0		0	0	0	0	0	0
429	2022-05-25	1847.4	1847.4	1847.4	1847.4	1847.4	1847.4	1847.4		0	0	0	0	0	0	0	0	0	0	0	0		0	0	0	0	0	0		0	0	0	0	0	0		0	0	0	0	0	0
430	2022-05-24	1846.2	1846.2	1846.2	1846.2	1846.2	1846.2	1846.2		0	0	0	0	0	0	0	0	0	0	0	0		0	0	0	0	0	0		0	0	0	0	0	0		0	0	0	0	0	0
431	2022-05-23	1865.1	1865.1	1865.1	1865.1	1865.1	1865.1	1865.1		0	0	0	0	0	0	0	0	0	0	0	0		0	0	0	0	0	0		0	0	0	0	0	0		0	0	0	0	0	0
432	2022-05-22	1847.8	1847.8	1847.8	1847.8	1847.8	1847.8	1847.8		0	0	0	0	0	0	0	0	0	0	0	0		0	0	0	0	0	0		0	0	0	0	0	0		0	0	0	0	0	0
433	2022-05-19	1841.8	1841.8	1841.8	1841.8	1841.8	1841.8	1841.8		0	0	0	0	0	0	0	0	0	0	0	0		0	0	0	0	0	0		0	0	0	0	0	0		0	0	0	0	0	0
434	2022-05-18	1841.2	1841.2	1841.2	1841.2	1841.2	1841.2	1841.2		0	0	0	0	0	0	0	0	0	0	0	0		0	0	0	0	0	0		0	0	0	0	0	0		0	0	0	0	0	0
435	2022-05-17	1815.9	1815.9	1815.9	1815.9	1815.9	1815.9	1815.9		0	0	0	0	0	0	0	0	0	0	0	0		0	0	0	0	0	0		0	0	0	0	0	0		0	0	0	0	0	0
436	2022-05-16	1818.2	1818.2	1818.2	1818.2	1818.2	1818.2	1818.2		0	0	0	0	0	0	0	0	0	0	0	0		0	0	0	0	0	0		0	0	0	0	0	0		0	0	0	0	0	0
437	2022-05-15	1813.5	1813.5	1813.5	1813.5	1813.5	1813.5	1813.5		0	0	0	0	0	0	0	0	0	0	0	0		0	0	0	0	0	0		0	0	0	0	0	0		0	0	0	0	0	0
438	2022-05-12	1807.4	1807.4	1807.4	1807.4	1807.4	1807.4	1807.4		0	0	0	0	0	0	0	0	0	0	0	0		0	0	0	0	0	0		0	0	0	0	0	0		0	0	0	0	0	0
439	2022-05-11	1823.8	1823.8	1823.8	1823.8	1823.8	1823.8	1823.8		0	0	0	0	0	0	0	0	0	0	0	0		0	0	0	0	0	0		0	0	0	0	0	0		0	0	0	0	0	0
440	2022-05-10	1852.6	1852.6	1852.6	1852.6	1852.6	1852.6	1852.6		0	0	0	0	0	0	0	0	0	0	0	0		0	0	0	0	0	0		0	0	0	0	0	0		0	0	0	0	0	0
441	2022-05-09	1839.9	1839.9	1839.9	1839.9	1839.9	1839.9	1839.9		0	0	0	0	0	0	0	0	0	0	0	0		0	0	0	0	0	0		0	0	0	0	0	0		0	0	0	0	0	0
442	2022-05-08	1857.1	1857.1	1857.1	1857.1	1857.1	1857.1	1857.1		0	0	0	0	0	0	0	0	0	0	0	0		0	0	0	0	0	0		0	0	0	0	0	0		0	0	0	0	0	0
443	2022-05-05	1881.2	1881.2	1881.2	1881.2	1881.2	1881.2	1881.2		0	0	0	0	0	0	0	0	0	0	0	0		0	0	0	0	0	0		0	0	0	0	0	0		0	0	0	0	0	0
444	2022-05-04	1874	1874.0	1874.0	1874.0	1874.0	1874.0	1874.0		0	0	0	0	0	0	0	0	0	0	0	0		0	0	0	0	0	0		0	0	0	0	0	0		0	0	0	0	0	0
445	2022-05-03	1867	1867.0	1867.0	1867.0	1867.0	1867.0	1867.0		0	0	0	0	0	0	0	0	0	0	0	0		0	0	0	0	0	0		0	0	0	0	0	0		0	0	0	0	0	0
446	2022-05-02	1868.8	1868.8	1868.8	1868.8	1868.8	1868.8	1868.8		0	0	0	0	0	0	0	0	0	0	0	0		0	0	0	0	0	0		0	0	0	0	0	0		0	0	0	0	0	0
447	2022-05-01	1861.8	1861.8	1861.8	1861.8	1861.8	1861.8	1861.8		0	0	0	0	0	0	0	0	0	0	0	0		0	0	0	0	0	0		0	0	0	0	0	0		0	0	0	0	0	0
448	2022-04-28	1909.3	1909.3	1909.3	1909.3	1909.3	1909.3	1909.3		0	0	0	0	0	0	0	0	0	0	0	0		0	0	0	0	0	0		0	0	0	0	0	0		0	0	0	0	0	0
449	2022-04-27	1888.7	1109.887	1886.269	1893.167	1885.190	1897.6	1202.936		-778.813	778.813	-2.431	2.431	4.467	4.467	-3.51	3.51	8.9	8.9	-685.764	685.764		606550	5.90976	19.9541	12.3201	79.21	470272		0.412354	0.00128713	-0.00236512	0.00185842	-0.00471224	0.363088		0.412354	0.00128713	0.00236512	0.00185842	0.00471224	0.363088
450	2022-04-26	1885.9	1885.9	1885.9	1885.9	1885.9	1885.9	1885.9		0	0	0	0	0	0	0	0	0	0	0	0		0	0	0	0	0	0		0	0	0	0	0	0		0	0	0	0	0	0
451	2022-04-25	1901.4	1901.4	1901.4	1901.4	1901.4	1901.4	1901.4		0	0	0	0	0	0	0	0	0	0	0	0		0	0	0	0	0	0		0	0	0	0	0	0		0	0	0	0	0	0
452	2022-04-24	1893.2	1893.2	1893.2	1893.2	1893.2	1893.2	1893.2		0	0	0	0	0	0	0	0	0	0	0	0		0	0	0	0	0	0		0	0	0	0	0	0		0	0	0	0	0	0
453	2022-04-21	1931	1109.887	1940.900	1940.933	1934.796	1931.975	1206.579		-821.113	821.113	9.9	9.9	9.933	9.933	3.796	3.796	0.975	0.975	-724.421	724.421		674227	98.01	98.6645	14.4096	0.950625	524786		0.425227	-0.00512688	-0.00514397	-0.00196582	-0.00050492	0.375153		0.425227	0.00512688	0.00514397	0.00196582	0.00050492	0.375153
454	2022-04-20	1944.9	1944.9	1944.9	1944.9	1944.9	1944.9	1944.9		0	0	0	0	0	0	0	0	0	0	0	0		0	0	0	0	0	0		0	0	0	0	0	0		0	0	0	0	0	0
455	2022-04-19	1952.3	1952.3	1952.3	1952.3	1952.3	1952.3	1952.3		0	0	0	0	0	0	0	0	0	0	0	0		0	0	0	0	0	0		0	0	0	0	0	0		0	0	0	0	0	0
456	2022-04-18	1955.7	1955.7	1955.7	1955.7	1955.7	1955.7	1955.7		0	0	0	0	0	0	0	0	0	0	0	0		0	0	0	0	0	0		0	0	0	0	0	0		0	0	0	0	0	0
457	2022-04-17	1982.9	1982.9	1982.9	1982.9	1982.9	1982.9	1982.9		0	0	0	0	0	0	0	0	0	0	0	0		0	0	0	0	0	0		0	0	0	0	0	0		0	0	0	0	0	0
458	2022-04-13	1970.9	1970.9	1970.9	1970.9	1970.9	1970.9	1970.9		0	0	0	0	0	0	0	0	0	0	0	0		0	0	0	0	0	0		0	0	0	0	0	0		0	0	0	0	0	0
459	2022-04-12	1981	1109.887	1981.320	1978.767	1978.267	1971.5	1207.678		-871.113	871.113	0.32	0.32	-2.233	2.233	-2.733	2.733	-9.5	9.5	-773.322	773.322		758838	0.1024	4.98629	7.46929	90.25	598027		0.439734	-0.000161535	0.00112721	0.00137961	0.00479556	0.39037		0.439734	0.000161535	0.00112721	0.00137961	0.00479556	0.39037
460	2022-04-11	1972.1	1972.1	1972.1	1972.1	1972.1	1972.1	1972.1		0	0	0	0	0	0	0	0	0	0	0	0		0	0	0	0	0	0		0	0	0	0	0	0		0	0	0	0	0	0
461	2022-04-10	1944.3	1944.3	1944.3	1944.3	1944.3	1944.3	1944.3		0	0	0	0	0	0	0	0	0	0	0	0		0	0	0	0	0	0		0	0	0	0	0	0		0	0	0	0	0	0
462	2022-04-07	1941.6	1941.6	1941.6	1941.6	1941.6	1941.6	1941.6		0	0	0	0	0	0	0	0	0	0	0	0		0	0	0	0	0	0		0	0	0	0	0	0		0	0	0	0	0	0
463	2022-04-06	1933.8	1933.8	1933.8	1933.8	1933.8	1933.8	1933.8		0	0	0	0	0	0	0	0	0	0	0	0		0	0	0	0	0	0		0	0	0	0	0	0		0	0	0	0	0	0
464	2022-04-05	1918.4	1918.4	1918.4	1918.4	1918.4	1918.4	1918.4		0	0	0	0	0	0	0	0	0	0	0	0		0	0	0	0	0	0		0	0	0	0	0	0		0	0	0	0	0	0
465	2022-04-04	1922.9	1922.9	1922.9	1922.9	1922.9	1922.9	1922.9		0	0	0	0	0	0	0	0	0	0	0	0		0	0	0	0	0	0		0	0	0	0	0	0		0	0	0	0	0	0
466	2022-04-03	1929.2	1109.887	1929.191	1929.867	1930.124	1921.950	1205.631		-819.313	819.313	-0.009	0.009	0.667	0.667	0.924	0.924	-7.25	7.25	-723.569	723.569		671274	8.1e-05	0.444889	0.853776	52.5625	523552		0.424691	4.66515e-06	-0.000345739	-0.000478955	0.00375803	0.375062		0.424691	4.66515e-06	0.000345739	0.000478955	0.00375803	0.375062
467	2022-03-31	1919.1	1919.1	1919.1	1919.1	1919.1	1919.1	1919.1		0	0	0	0	0	0	0	0	0	0	0	0		0	0	0	0	0	0		0	0	0	0	0	0		0	0	0	0	0	0
468	2022-03-30	1949.2	1949.2	1949.2	1949.2	1949.2	1949.2	1949.2		0	0	0	0	0	0	0	0	0	0	0	0		0	0	0	0	0	0		0	0	0	0	0	0		0	0	0	0	0	0
469	2022-03-29	1933.5	1933.5	1933.5	1933.5	1933.5	1933.5	1933.5		0	0	0	0	0	0	0	0	0	0	0	0		0	0	0	0	0	0		0	0	0	0	0	0		0	0	0	0	0	0
470	2022-03-28	1912	1912.0	1912.0	1912.0	1912.0	1912.0	1912.0		0	0	0	0	0	0	0	0	0	0	0	0		0	0	0	0	0	0		0	0	0	0	0	0		0	0	0	0	0	0
471	2022-03-27	1939.6	1939.6	1939.6	1939.6	1939.6	1939.6	1939.6		0	0	0	0	0	0	0	0	0	0	0	0		0	0	0	0	0	0		0	0	0	0	0	0		0	0	0	0	0	0
472	2022-03-24	1953.8	1109.887	1953.767	1954.133	1954.947	1956.1	1207.009		-843.913	843.913	-0.033	0.033	0.333	0.333	1.147	1.147	2.3	2.3	-746.791	746.791		712189	0.001089	0.110889	1.31561	5.29	557697		0.431934	1.68902e-05	-0.000170437	-0.000587061	-0.00117719	0.382225		0.431934	1.68902e-05	0.000170437	0.000587061	0.00117719	0.382225
473	2022-03-23	1961.6	1961.6	1961.6	1961.6	1961.6	1961.6	1961.6		0	0	0	0	0	0	0	0	0	0	0	0		0	0	0	0	0	0		0	0	0	0	0	0		0	0	0	0	0	0
474	2022-03-22	1936.6	1936.6	1936.6	1936.6	1936.6	1936.6	1936.6		0	0	0	0	0	0	0	0	0	0	0	0		0	0	0	0	0	0		0	0	0	0	0	0		0	0	0	0	0	0
475	2022-03-21	1920.7	1920.7	1920.7	1920.7	1920.7	1920.7	1920.7		0	0	0	0	0	0	0	0	0	0	0	0		0	0	0	0	0	0		0	0	0	0	0	0		0	0	0	0	0	0
476	2022-03-20	1928.6	1928.6	1928.6	1928.6	1928.6	1928.6	1928.6		0	0	0	0	0	0	0	0	0	0	0	0		0	0	0	0	0	0		0	0	0	0	0	0		0	0	0	0	0	0
477	2022-03-17	1928.2	1928.2	1928.2	1928.2	1928.2	1928.2	1928.2		0	0	0	0	0	0	0	0	0	0	0	0		0	0	0	0	0	0		0	0	0	0	0	0		0	0	0	0	0	0
478	2022-03-16	1942.1	1942.1	1942.1	1942.1	1942.1	1942.1	1942.1		0	0	0	0	0	0	0	0	0	0	0	0		0	0	0	0	0	0		0	0	0	0	0	0		0	0	0	0	0	0
479	2022-03-15	1908	1109.887	1915.981	1909.867	1917.130	1935.3	1205.230		-798.113	798.113	7.981	7.981	1.867	1.867	9.13	9.13	27.3	27.3	-702.77	702.77		636984	63.6964	3.48569	83.3569	745.29	493886		0.418298	-0.00418291	-0.000978512	-0.00478512	-0.0143082	0.368328		0.418298	0.00418291	0.000978512	0.00478512	0.0143082	0.368328
480	2022-03-14	1928.5	1928.5	1928.5	1928.5	1928.5	1928.5	1928.5		0	0	0	0	0	0	0	0	0	0	0	0		0	0	0	0	0	0		0	0	0	0	0	0		0	0	0	0	0	0
481	2022-03-13	1959.6	1959.6	1959.6	1959.6	1959.6	1959.6	1959.6		0	0	0	0	0	0	0	0	0	0	0	0		0	0	0	0	0	0		0	0	0	0	0	0		0	0	0	0	0	0
482	2022-03-11	1982.7	1982.7	1982.7	1982.7	1982.7	1982.7	1982.7		0	0	0	0	0	0	0	0	0	0	0	0		0	0	0	0	0	0		0	0	0	0	0	0		0	0	0	0	0	0
483	2022-03-10	1998.1	1109.887	1999.723	1988.967	1989.605	1984.3	1208.027		-888.213	888.213	1.623	1.623	-9.133	9.133	-8.495	8.495	-13.8	13.8	-790.073	790.073		788922	2.63413	83.4117	72.165	190.44	624215		0.444529	-0.000812272	0.00457084	0.00425154	0.00690656	0.395412		0.444529	0.000812272	0.00457084	0.00425154	0.00690656	0.395412
484	2022-03-09	1985.9	1985.9	1985.9	1985.9	1985.9	1985.9	1985.9		0	0	0	0	0	0	0	0	0	0	0	0		0	0	0	0	0	0		0	0	0	0	0	0		0	0	0	0	0	0
485	2022-03-08	2040.1	2040.1	2040.1	2040.1	2040.1	2040.1	2040.1		0	0	0	0	0	0	0	0	0	0	0	0		0	0	0	0	0	0		0	0	0	0	0	0		0	0	0	0	0	0
486	2022-03-07	1993.9	1993.9	1993.9	1993.9	1993.9	1993.9	1993.9		0	0	0	0	0	0	0	0	0	0	0	0		0	0	0	0	0	0		0	0	0	0	0	0		0	0	0	0	0	0
487	2022-03-04	1965.1	1965.1	1965.1	1965.1	1965.1	1965.1	1965.1		0	0	0	0	0	0	0	0	0	0	0	0		0	0	0	0	0	0		0	0	0	0	0	0		0	0	0	0	0	0
488	2022-03-03	1934.4	1934.4	1934.4	1934.4	1934.4	1934.4	1934.4		0	0	0	0	0	0	0	0	0	0	0	0		0	0	0	0	0	0		0	0	0	0	0	0		0	0	0	0	0	0
489	2022-03-02	1920.9	1920.9	1920.9	1920.9	1920.9	1920.9	1920.9		0	0	0	0	0	0	0	0	0	0	0	0		0	0	0	0	0	0		0	0	0	0	0	0		0	0	0	0	0	0
490	2022-03-01	1942.4	1942.4	1942.4	1942.4	1942.4	1942.4	1942.4		0	0	0	0	0	0	0	0	0	0	0	0		0	0	0	0	0	0		0	0	0	0	0	0		0	0	0	0	0	0
491	2022-02-28	1899.4	1899.4	1899.4	1899.4	1899.4	1899.4	1899.4		0	0	0	0	0	0	0	0	0	0	0	0		0	0	0	0	0	0		0	0	0	0	0	0		0	0	0	0	0	0
492	2022-02-24	1886.5	1886.5	1886.5	1886.5	1886.5	1886.5	1886.5		0	0	0	0	0	0	0	0	0	0	0	0		0	0	0	0	0	0		0	0	0	0	0	0		0	0	0	0	0	0
493	2022-02-24	1925.1	1109.887	1933.427	1941.733	1949.821	1886.5	1205.902		-815.213	815.213	8.327	8.327	16.633	16.633	24.721	24.721	-38.6	38.6	-719.198	719.198		664572	69.3389	276.657	611.128	1489.96	517246		0.423465	-0.00432549	-0.00864007	-0.0128414	0.0200509	0.37359		0.423465	0.00432549	0.00864007	0.0128414	0.0200509	0.37359
494	2022-02-23	1909.2	1909.2	1909.2	1909.2	1909.2	1909.2	1909.2		0	0	0	0	0	0	0	0	0	0	0	0		0	0	0	0	0	0		0	0	0	0	0	0		0	0	0	0	0	0
495	2022-02-22	1906.1	1906.1	1906.1	1906.1	1906.1	1906.1	1906.1		0	0	0	0	0	0	0	0	0	0	0	0		0	0	0	0	0	0		0	0	0	0	0	0		0	0	0	0	0	0
496	2022-02-18	1898.6	1109.887	1899.656	1893.667	1895.436	1901.780	1203.895		-788.713	788.713	1.056	1.056	-4.933	4.933	-3.164	3.164	3.18	3.18	-694.705	694.705		622068	1.11514	24.3345	10.0109	10.1124	482615		0.415418	-0.000556199	0.00259823	0.00166649	-0.00167492	0.365904		0.415418	0.000556199	0.00259823	0.00166649	0.00167492	0.365904
497	2022-02-17	1900.7	1900.7	1900.7	1900.7	1900.7	1900.7	1900.7		0	0	0	0	0	0	0	0	0	0	0	0		0	0	0	0	0	0		0	0	0	0	0	0		0	0	0	0	0	0
498	2022-02-16	1870.2	1870.2	1870.2	1870.2	1870.2	1870.2	1870.2		0	0	0	0	0	0	0	0	0	0	0	0		0	0	0	0	0	0		0	0	0	0	0	0		0	0	0	0	0	0
499	2022-02-15	1854.8	1854.8	1854.8	1854.8	1854.8	1854.8	1854.8		0	0	0	0	0	0	0	0	0	0	0	0		0	0	0	0	0	0		0	0	0	0	0	0		0	0	0	0	0	0
500	2022-02-14	1868	1868.0	1868.0	1868.0	1868.0	1868.0	1868.0		0	0	0	0	0	0	0	0	0	0	0	0		0	0	0	0	0	0		0	0	0	0	0	0		0	0	0	0	0	0
501	2022-02-11	1840.8	1840.8	1840.8	1840.8	1840.8	1840.8	1840.8		0	0	0	0	0	0	0	0	0	0	0	0		0	0	0	0	0	0		0	0	0	0	0	0		0	0	0	0	0	0
502	2022-02-10	1836.2	1836.2	1836.2	1836.2	1836.2	1836.2	1836.2		0	0	0	0	0	0	0	0	0	0	0	0		0	0	0	0	0	0		0	0	0	0	0	0		0	0	0	0	0	0
503	2022-02-09	1835.2	1109.887	1828.764	1830.7	1832.293	1831.4	1198.139		-725.313	725.313	-6.436	6.436	-4.5	4.5	-2.907	2.907	-3.8	3.8	-637.061	637.061		526079	41.4221	20.25	8.45065	14.44	405847		0.395223	0.00350697	0.00245205	0.00158402	0.00207062	0.347134		0.395223	0.00350697	0.00245205	0.00158402	0.00207062	0.347134
504	2022-02-08	1826.6	1826.6	1826.6	1826.6	1826.6	1826.6	1826.6		0	0	0	0	0	0	0	0	0	0	0	0		0	0	0	0	0	0		0	0	0	0	0	0		0	0	0	0	0	0
505	2022-02-07	1820.6	1820.6	1820.6	1820.6	1820.6	1820.6	1820.6		0	0	0	0	0	0	0	0	0	0	0	0		0	0	0	0	0	0		0	0	0	0	0	0		0	0	0	0	0	0
506	2022-02-04	1806.6	1806.6	1806.6	1806.6	1806.6	1806.6	1806.6		0	0	0	0	0	0	0	0	0	0	0	0		0	0	0	0	0	0		0	0	0	0	0	0		0	0	0	0	0	0
507	2022-02-03	1803	1803.0	1803.0	1803.0	1803.0	1803.0	1803.0		0	0	0	0	0	0	0	0	0	0	0	0		0	0	0	0	0	0		0	0	0	0	0	0		0	0	0	0	0	0
508	2022-02-02	1809.2	1809.2	1809.2	1809.2	1809.2	1809.2	1809.2		0	0	0	0	0	0	0	0	0	0	0	0		0	0	0	0	0	0		0	0	0	0	0	0		0	0	0	0	0	0
509	2022-02-01	1800.3	1800.3	1800.3	1800.3	1800.3	1800.3	1800.3		0	0	0	0	0	0	0	0	0	0	0	0		0	0	0	0	0	0		0	0	0	0	0	0		0	0	0	0	0	0
510	2022-01-31	1795	1795.0	1795.0	1795.0	1795.0	1795.0	1795.0		0	0	0	0	0	0	0	0	0	0	0	0		0	0	0	0	0	0		0	0	0	0	0	0		0	0	0	0	0	0
511	2022-01-28	1784.9	1784.9	1784.9	1784.9	1784.9	1784.9	1784.9		0	0	0	0	0	0	0	0	0	0	0	0		0	0	0	0	0	0		0	0	0	0	0	0		0	0	0	0	0	0
512	2022-01-27	1793.3	1793.3	1793.3	1793.3	1793.3	1793.3	1793.3		0	0	0	0	0	0	0	0	0	0	0	0		0	0	0	0	0	0		0	0	0	0	0	0		0	0	0	0	0	0
513	2022-01-26	1829.9	1829.9	1829.9	1829.9	1829.9	1829.9	1829.9		0	0	0	0	0	0	0	0	0	0	0	0		0	0	0	0	0	0		0	0	0	0	0	0		0	0	0	0	0	0
514	2022-01-25	1852.7	1852.7	1852.7	1852.7	1852.7	1852.7	1852.7		0	0	0	0	0	0	0	0	0	0	0	0		0	0	0	0	0	0		0	0	0	0	0	0		0	0	0	0	0	0
515	2022-01-24	1841.7	1841.7	1841.7	1841.7	1841.7	1841.7	1841.7		0	0	0	0	0	0	0	0	0	0	0	0		0	0	0	0	0	0		0	0	0	0	0	0		0	0	0	0	0	0
516	2022-01-21	1831.8	1831.8	1831.8	1831.8	1831.8	1831.8	1831.8		0	0	0	0	0	0	0	0	0	0	0	0		0	0	0	0	0	0		0	0	0	0	0	0		0	0	0	0	0	0
517	2022-01-20	1842.5	1842.5	1842.5	1842.5	1842.5	1842.5	1842.5		0	0	0	0	0	0	0	0	0	0	0	0		0	0	0	0	0	0		0	0	0	0	0	0		0	0	0	0	0	0
518	2022-01-19	1843.1	1843.1	1843.1	1843.1	1843.1	1843.1	1843.1		0	0	0	0	0	0	0	0	0	0	0	0		0	0	0	0	0	0		0	0	0	0	0	0		0	0	0	0	0	0
519	2022-01-18	1812.3	1812.3	1812.3	1812.3	1812.3	1812.3	1812.3		0	0	0	0	0	0	0	0	0	0	0	0		0	0	0	0	0	0		0	0	0	0	0	0		0	0	0	0	0	0
520	2022-01-14	1816.5	1816.5	1816.5	1816.5	1816.5	1816.5	1816.5		0	0	0	0	0	0	0	0	0	0	0	0		0	0	0	0	0	0		0	0	0	0	0	0		0	0	0	0	0	0
521	2022-01-13	1821.2	1821.2	1821.2	1821.2	1821.2	1821.2	1821.2		0	0	0	0	0	0	0	0	0	0	0	0		0	0	0	0	0	0		0	0	0	0	0	0		0	0	0	0	0	0
522	2022-01-12	1827.2	1827.2	1827.2	1827.2	1827.2	1827.2	1827.2		0	0	0	0	0	0	0	0	0	0	0	0		0	0	0	0	0	0		0	0	0	0	0	0		0	0	0	0	0	0
523	2022-01-11	1818.6	1818.6	1818.6	1818.6	1818.6	1818.6	1818.6		0	0	0	0	0	0	0	0	0	0	0	0		0	0	0	0	0	0		0	0	0	0	0	0		0	0	0	0	0	0
524	2022-01-10	1798.4	1798.4	1798.4	1798.4	1798.4	1798.4	1798.4		0	0	0	0	0	0	0	0	0	0	0	0		0	0	0	0	0	0		0	0	0	0	0	0		0	0	0	0	0	0
525	2022-01-07	1797	1797.0	1797.0	1797.0	1797.0	1797.0	1797.0		0	0	0	0	0	0	0	0	0	0	0	0		0	0	0	0	0	0		0	0	0	0	0	0		0	0	0	0	0	0
526	2022-01-06	1788.7	1788.7	1788.7	1788.7	1788.7	1788.7	1788.7		0	0	0	0	0	0	0	0	0	0	0	0		0	0	0	0	0	0		0	0	0	0	0	0		0	0	0	0	0	0
527	2022-01-05	1824.6	1824.6	1824.6	1824.6	1824.6	1824.6	1824.6		0	0	0	0	0	0	0	0	0	0	0	0		0	0	0	0	0	0		0	0	0	0	0	0		0	0	0	0	0	0
528	2022-01-04	1814	1814.0	1814.0	1814.0	1814.0	1814.0	1814.0		0	0	0	0	0	0	0	0	0	0	0	0		0	0	0	0	0	0		0	0	0	0	0	0		0	0	0	0	0	0
529	2022-01-03	1799.4	1799.4	1799.4	1799.4	1799.4	1799.4	1799.4		0	0	0	0	0	0	0	0	0	0	0	0		0	0	0	0	0	0		0	0	0	0	0	0		0	0	0	0	0	0
530	2021-12-31	1827.5	1827.5	1827.5	1827.5	1827.5	1827.5	1827.5		0	0	0	0	0	0	0	0	0	0	0	0		0	0	0	0	0	0		0	0	0	0	0	0		0	0	0	0	0	0
531	2021-12-30	1812.7	1812.7	1812.7	1812.7	1812.7	1812.7	1812.7		0	0	0	0	0	0	0	0	0	0	0	0		0	0	0	0	0	0		0	0	0	0	0	0		0	0	0	0	0	0
532	2021-12-29	1805.1	1805.1	1805.1	1805.1	1805.1	1805.1	1805.1		0	0	0	0	0	0	0	0	0	0	0	0		0	0	0	0	0	0		0	0	0	0	0	0		0	0	0	0	0	0
533	2021-12-28	1810.2	1810.2	1810.2	1810.2	1810.2	1810.2	1810.2		0	0	0	0	0	0	0	0	0	0	0	0		0	0	0	0	0	0		0	0	0	0	0	0		0	0	0	0	0	0
534	2021-12-27	1808.1	1808.1	1808.1	1808.1	1808.1	1808.1	1808.1		0	0	0	0	0	0	0	0	0	0	0	0		0	0	0	0	0	0		0	0	0	0	0	0		0	0	0	0	0	0
535	2021-12-23	1811.2	1811.2	1811.2	1811.2	1811.2	1811.2	1811.2		0	0	0	0	0	0	0	0	0	0	0	0		0	0	0	0	0	0		0	0	0	0	0	0		0	0	0	0	0	0
536	2021-12-22	1801.6	1801.6	1801.6	1801.6	1801.6	1801.6	1801.6		0	0	0	0	0	0	0	0	0	0	0	0		0	0	0	0	0	0		0	0	0	0	0	0		0	0	0	0	0	0
537	2021-12-21	1787.9	1787.9	1787.9	1787.9	1787.9	1787.9	1787.9		0	0	0	0	0	0	0	0	0	0	0	0		0	0	0	0	0	0		0	0	0	0	0	0		0	0	0	0	0	0
538	2021-12-20	1793.7	1793.7	1793.7	1793.7	1793.7	1793.7	1793.7		0	0	0	0	0	0	0	0	0	0	0	0		0	0	0	0	0	0		0	0	0	0	0	0		0	0	0	0	0	0
539	2021-12-17	1803.8	1803.8	1803.8	1803.8	1803.8	1803.8	1803.8		0	0	0	0	0	0	0	0	0	0	0	0		0	0	0	0	0	0		0	0	0	0	0	0		0	0	0	0	0	0
540	2021-12-16	1796.6	1109.887	1797.689	1789.2	1797.000	1783.2	1193.669		-686.713	686.713	1.089	1.089	-7.4	7.4	0.4	0.4	-13.4	13.4	-602.931	602.931		471575	1.18592	54.76	0.16	179.56	363526		0.382229	-0.000606145	0.00411889	-0.000222643	0.00745853	0.335596		0.382229	0.000606145	0.00411889	0.000222643	0.00745853	0.335596
541	2021-12-15	1762.6	1762.6	1762.6	1762.6	1762.6	1762.6	1762.6		0	0	0	0	0	0	0	0	0	0	0	0		0	0	0	0	0	0		0	0	0	0	0	0		0	0	0	0	0	0
542	2021-12-14	1770.4	1770.4	1770.4	1770.4	1770.4	1770.4	1770.4		0	0	0	0	0	0	0	0	0	0	0	0		0	0	0	0	0	0		0	0	0	0	0	0		0	0	0	0	0	0
543	2021-12-13	1786.3	1786.3	1786.3	1786.3	1786.3	1786.3	1786.3		0	0	0	0	0	0	0	0	0	0	0	0		0	0	0	0	0	0		0	0	0	0	0	0		0	0	0	0	0	0
544	2021-12-10	1782.9	1782.9	1782.9	1782.9	1782.9	1782.9	1782.9		0	0	0	0	0	0	0	0	0	0	0	0		0	0	0	0	0	0		0	0	0	0	0	0		0	0	0	0	0	0
545	2021-12-09	1774.6	1774.6	1774.6	1774.6	1774.6	1774.6	1774.6		0	0	0	0	0	0	0	0	0	0	0	0		0	0	0	0	0	0		0	0	0	0	0	0		0	0	0	0	0	0
546	2021-12-08	1783.4	1783.4	1783.4	1783.4	1783.4	1783.4	1783.4		0	0	0	0	0	0	0	0	0	0	0	0		0	0	0	0	0	0		0	0	0	0	0	0		0	0	0	0	0	0
547	2021-12-07	1782.6	1782.6	1782.6	1782.6	1782.6	1782.6	1782.6		0	0	0	0	0	0	0	0	0	0	0	0		0	0	0	0	0	0		0	0	0	0	0	0		0	0	0	0	0	0
548	2021-12-06	1777.5	1777.5	1777.5	1777.5	1777.5	1777.5	1777.5		0	0	0	0	0	0	0	0	0	0	0	0		0	0	0	0	0	0		0	0	0	0	0	0		0	0	0	0	0	0
549	2021-12-03	1782	1782.0	1782.0	1782.0	1782.0	1782.0	1782.0		0	0	0	0	0	0	0	0	0	0	0	0		0	0	0	0	0	0		0	0	0	0	0	0		0	0	0	0	0	0
550	2021-12-02	1760.7	1760.7	1760.7	1760.7	1760.7	1760.7	1760.7		0	0	0	0	0	0	0	0	0	0	0	0		0	0	0	0	0	0		0	0	0	0	0	0		0	0	0	0	0	0
551	2021-12-01	1781.6	1781.6	1781.6	1781.6	1781.6	1781.6	1781.6		0	0	0	0	0	0	0	0	0	0	0	0		0	0	0	0	0	0		0	0	0	0	0	0		0	0	0	0	0	0
552	2021-11-30	1773.6	1773.6	1773.6	1773.6	1773.6	1773.6	1773.6		0	0	0	0	0	0	0	0	0	0	0	0		0	0	0	0	0	0		0	0	0	0	0	0		0	0	0	0	0	0
553	2021-11-29	1782.3	1782.3	1782.3	1782.3	1782.3	1782.3	1782.3		0	0	0	0	0	0	0	0	0	0	0	0		0	0	0	0	0	0		0	0	0	0	0	0		0	0	0	0	0	0
554	2021-11-26	1785.3	1785.3	1785.3	1785.3	1785.3	1785.3	1785.3		0	0	0	0	0	0	0	0	0	0	0	0		0	0	0	0	0	0		0	0	0	0	0	0		0	0	0	0	0	0
555	2021-11-24	1784.1	1784.1	1784.1	1784.1	1784.1	1784.1	1784.1		0	0	0	0	0	0	0	0	0	0	0	0		0	0	0	0	0	0		0	0	0	0	0	0		0	0	0	0	0	0
556	2021-11-23	1783.5	1783.5	1783.5	1783.5	1783.5	1783.5	1783.5		0	0	0	0	0	0	0	0	0	0	0	0		0	0	0	0	0	0		0	0	0	0	0	0		0	0	0	0	0	0
557	2021-11-22	1806	1806.0	1806.0	1806.0	1806.0	1806.0	1806.0		0	0	0	0	0	0	0	0	0	0	0	0		0	0	0	0	0	0		0	0	0	0	0	0		0	0	0	0	0	0
558	2021-11-19	1851.2	1851.2	1851.2	1851.2	1851.2	1851.2	1851.2		0	0	0	0	0	0	0	0	0	0	0	0		0	0	0	0	0	0		0	0	0	0	0	0		0	0	0	0	0	0
559	2021-11-18	1861	1861.0	1861.0	1861.0	1861.0	1861.0	1861.0		0	0	0	0	0	0	0	0	0	0	0	0		0	0	0	0	0	0		0	0	0	0	0	0		0	0	0	0	0	0
560	2021-11-17	1869.7	1869.7	1869.7	1869.7	1869.7	1869.7	1869.7		0	0	0	0	0	0	0	0	0	0	0	0		0	0	0	0	0	0		0	0	0	0	0	0		0	0	0	0	0	0
561	2021-11-16	1853.6	1853.6	1853.6	1853.6	1853.6	1853.6	1853.6		0	0	0	0	0	0	0	0	0	0	0	0		0	0	0	0	0	0		0	0	0	0	0	0		0	0	0	0	0	0
562	2021-11-15	1866.1	1109.887	1862.622	1867.333	1867.040	1857.175	1201.497		-756.213	756.213	-3.478	3.478	1.233	1.233	0.94	0.94	-8.925	8.925	-664.603	664.603		571858	12.0965	1.52029	0.8836	79.6556	441697		0.405237	0.00186378	-0.000660736	-0.000503724	0.0047827	0.356145		0.405237	0.00186378	0.000660736	0.000503724	0.0047827	0.356145
563	2021-11-12	1867.9	1867.9	1867.9	1867.9	1867.9	1867.9	1867.9		0	0	0	0	0	0	0	0	0	0	0	0		0	0	0	0	0	0		0	0	0	0	0	0		0	0	0	0	0	0
564	2021-11-11	1863.2	1863.2	1863.2	1863.2	1863.2	1863.2	1863.2		0	0	0	0	0	0	0	0	0	0	0	0		0	0	0	0	0	0		0	0	0	0	0	0		0	0	0	0	0	0
565	2021-11-10	1847.6	1847.6	1847.6	1847.6	1847.6	1847.6	1847.6		0	0	0	0	0	0	0	0	0	0	0	0		0	0	0	0	0	0		0	0	0	0	0	0		0	0	0	0	0	0
566	2021-11-09	1830.2	1830.2	1830.2	1830.2	1830.2	1830.2	1830.2		0	0	0	0	0	0	0	0	0	0	0	0		0	0	0	0	0	0		0	0	0	0	0	0		0	0	0	0	0	0
567	2021-11-08	1827.4	1827.4	1827.4	1827.4	1827.4	1827.4	1827.4		0	0	0	0	0	0	0	0	0	0	0	0		0	0	0	0	0	0		0	0	0	0	0	0		0	0	0	0	0	0
568	2021-11-04	1816.4	1816.4	1816.4	1816.4	1816.4	1816.4	1816.4		0	0	0	0	0	0	0	0	0	0	0	0		0	0	0	0	0	0		0	0	0	0	0	0		0	0	0	0	0	0
569	2021-11-03	1793	1793.0	1793.0	1793.0	1793.0	1793.0	1793.0		0	0	0	0	0	0	0	0	0	0	0	0		0	0	0	0	0	0		0	0	0	0	0	0		0	0	0	0	0	0
570	2021-11-02	1763.6	1763.6	1763.6	1763.6	1763.6	1763.6	1763.6		0	0	0	0	0	0	0	0	0	0	0	0		0	0	0	0	0	0		0	0	0	0	0	0		0	0	0	0	0	0
571	2021-11-01	1788.7	1109.887	1790.378	1789.867	1791.488	1768.450	1194.181		-678.813	678.813	1.678	1.678	1.167	1.167	2.788	2.788	-20.25	20.25	-594.519	594.519		460787	2.81568	1.36189	7.77294	410.062	353453		0.379501	-0.000938111	-0.000652429	-0.00155867	0.0113211	0.332375		0.379501	0.000938111	0.000652429	0.00155867	0.0113211	0.332375
572	2021-10-31	1795.1	1109.887	1790.378	1791.567	1791.615	1773.3	1194.017		-685.213	685.213	-4.722	4.722	-3.533	3.533	-3.485	3.485	-21.8	21.8	-601.083	601.083		469517	22.2973	12.4821	12.1452	475.24	361301		0.381713	0.00263049	0.00196814	0.0019414	0.0121442	0.334847		0.381713	0.00263049	0.00196814	0.0019414	0.0121442	0.334847
573	2021-10-29	1783	1783.0	1783.0	1783.0	1783.0	1783.0	1783.0		0	0	0	0	0	0	0	0	0	0	0	0		0	0	0	0	0	0		0	0	0	0	0	0		0	0	0	0	0	0
574	2021-10-27	1801.6	1801.6	1801.6	1801.6	1801.6	1801.6	1801.6		0	0	0	0	0	0	0	0	0	0	0	0		0	0	0	0	0	0		0	0	0	0	0	0		0	0	0	0	0	0
575	2021-10-26	1797.9	1797.9	1797.9	1797.9	1797.9	1797.9	1797.9		0	0	0	0	0	0	0	0	0	0	0	0		0	0	0	0	0	0		0	0	0	0	0	0		0	0	0	0	0	0
576	2021-10-25	1792.7	1792.7	1792.7	1792.7	1792.7	1792.7	1792.7		0	0	0	0	0	0	0	0	0	0	0	0		0	0	0	0	0	0		0	0	0	0	0	0		0	0	0	0	0	0
577	2021-10-24	1806	1806.0	1806.0	1806.0	1806.0	1806.0	1806.0		0	0	0	0	0	0	0	0	0	0	0	0		0	0	0	0	0	0		0	0	0	0	0	0		0	0	0	0	0	0
578	2021-10-21	1795.5	1795.5	1795.5	1795.5	1795.5	1795.5	1795.5		0	0	0	0	0	0	0	0	0	0	0	0		0	0	0	0	0	0		0	0	0	0	0	0		0	0	0	0	0	0
579	2021-10-20	1781.2	1109.887	1787.691	1783.8	1785.867	1789.8	1193.235		-671.313	671.313	6.491	6.491	2.6	2.6	4.667	4.667	8.6	8.6	-587.965	587.965		450661	42.1331	6.76	21.7809	73.96	345703		0.376888	-0.00364417	-0.00145969	-0.00262014	-0.00482821	0.330095		0.376888	0.00364417	0.00145969	0.00262014	0.00482821	0.330095
580	2021-10-19	1784.1	1784.1	1784.1	1784.1	1784.1	1784.1	1784.1		0	0	0	0	0	0	0	0	0	0	0	0		0	0	0	0	0	0		0	0	0	0	0	0		0	0	0	0	0	0
581	2021-10-18	1769.7	1769.7	1769.7	1769.7	1769.7	1769.7	1769.7		0	0	0	0	0	0	0	0	0	0	0	0		0	0	0	0	0	0		0	0	0	0	0	0		0	0	0	0	0	0
582	2021-10-17	1764.8	1764.8	1764.8	1764.8	1764.8	1764.8	1764.8		0	0	0	0	0	0	0	0	0	0	0	0		0	0	0	0	0	0		0	0	0	0	0	0		0	0	0	0	0	0
583	2021-10-14	1767.2	1109.887	1779.477	1776.367	1773.834	1788.725	1193.514		-657.313	657.313	12.277	12.277	9.167	9.167	6.634	6.634	21.525	21.525	-573.686	573.686		432060	150.725	84.0339	44.01	463.326	329116		0.371952	-0.00694715	-0.0051873	-0.00375396	-0.0121803	0.32463		0.371952	0.00694715	0.0051873	0.00375396	0.0121803	0.32463
584	2021-10-13	1796.7	1796.7	1796.7	1796.7	1796.7	1796.7	1796.7		0	0	0	0	0	0	0	0	0	0	0	0		0	0	0	0	0	0		0	0	0	0	0	0		0	0	0	0	0	0
585	2021-10-12	1793.7	1793.7	1793.7	1793.7	1793.7	1793.7	1793.7		0	0	0	0	0	0	0	0	0	0	0	0		0	0	0	0	0	0		0	0	0	0	0	0		0	0	0	0	0	0
586	2021-10-11	1758.3	1758.3	1758.3	1758.3	1758.3	1758.3	1758.3		0	0	0	0	0	0	0	0	0	0	0	0		0	0	0	0	0	0		0	0	0	0	0	0		0	0	0	0	0	0
587	2021-10-10	1754.6	1754.6	1754.6	1754.6	1754.6	1754.6	1754.6		0	0	0	0	0	0	0	0	0	0	0	0		0	0	0	0	0	0		0	0	0	0	0	0		0	0	0	0	0	0
588	2021-10-07	1756.3	1756.3	1756.3	1756.3	1756.3	1756.3	1756.3		0	0	0	0	0	0	0	0	0	0	0	0		0	0	0	0	0	0		0	0	0	0	0	0		0	0	0	0	0	0
589	2021-10-06	1757.9	1757.9	1757.9	1757.9	1757.9	1757.9	1757.9		0	0	0	0	0	0	0	0	0	0	0	0		0	0	0	0	0	0		0	0	0	0	0	0		0	0	0	0	0	0
590	2021-10-05	1760.5	1760.5	1760.5	1760.5	1760.5	1760.5	1760.5		0	0	0	0	0	0	0	0	0	0	0	0		0	0	0	0	0	0		0	0	0	0	0	0		0	0	0	0	0	0
591	2021-10-04	1759.6	1759.6	1759.6	1759.6	1759.6	1759.6	1759.6		0	0	0	0	0	0	0	0	0	0	0	0		0	0	0	0	0	0		0	0	0	0	0	0		0	0	0	0	0	0
592	2021-10-03	1766.2	1766.2	1766.2	1766.2	1766.2	1766.2	1766.2		0	0	0	0	0	0	0	0	0	0	0	0		0	0	0	0	0	0		0	0	0	0	0	0		0	0	0	0	0	0
593	2021-09-30	1757	1109.887	1752.725	1758.033	1754.051	1758.025	1189.954		-647.113	647.113	-4.275	4.275	1.033	1.033	-2.949	2.949	1.025	1.025	-567.046	567.046		418755	18.2756	1.06709	8.6966	1.05063	321541		0.368306	0.00243312	-0.000587934	0.00167843	-0.000583381	0.322735		0.368306	0.00243312	0.000587934	0.00167843	0.000583381	0.322735
594	2021-09-29	1755.3	1755.3	1755.3	1755.3	1755.3	1755.3	1755.3		0	0	0	0	0	0	0	0	0	0	0	0		0	0	0	0	0	0		0	0	0	0	0	0		0	0	0	0	0	0
595	2021-09-28	1721.5	1721.5	1721.5	1721.5	1721.5	1721.5	1721.5		0	0	0	0	0	0	0	0	0	0	0	0		0	0	0	0	0	0		0	0	0	0	0	0		0	0	0	0	0	0
596	2021-09-27	1735.8	1735.8	1735.8	1735.8	1735.8	1735.8	1735.8		0	0	0	0	0	0	0	0	0	0	0	0		0	0	0	0	0	0		0	0	0	0	0	0		0	0	0	0	0	0
597	2021-09-26	1750	1750.0	1750.0	1750.0	1750.0	1750.0	1750.0		0	0	0	0	0	0	0	0	0	0	0	0		0	0	0	0	0	0		0	0	0	0	0	0		0	0	0	0	0	0
598	2021-09-23	1749.7	1749.7	1749.7	1749.7	1749.7	1749.7	1749.7		0	0	0	0	0	0	0	0	0	0	0	0		0	0	0	0	0	0		0	0	0	0	0	0		0	0	0	0	0	0
599	2021-09-22	1747.7	1747.7	1747.7	1747.7	1747.7	1747.7	1747.7		0	0	0	0	0	0	0	0	0	0	0	0		0	0	0	0	0	0		0	0	0	0	0	0		0	0	0	0	0	0
600	2021-09-21	1776.7	1776.7	1776.7	1776.7	1776.7	1776.7	1776.7		0	0	0	0	0	0	0	0	0	0	0	0		0	0	0	0	0	0		0	0	0	0	0	0		0	0	0	0	0	0
601	2021-09-20	1776	1109.887	1780.188	1772.6	1769.818	1769.250	1191.230		-666.113	666.113	4.188	4.188	-3.4	3.4	-6.182	6.182	-6.75	6.75	-584.77	584.77		443707	17.5393	11.56	38.2171	45.5625	341956		0.375064	-0.00235811	0.00191441	0.00348086	0.00380068	0.329262		0.375064	0.00235811	0.00191441	0.00348086	0.00380068	0.329262
602	2021-09-19	1761.8	1761.8	1761.8	1761.8	1761.8	1761.8	1761.8		0	0	0	0	0	0	0	0	0	0	0	0		0	0	0	0	0	0		0	0	0	0	0	0		0	0	0	0	0	0
603	2021-09-16	1749.4	1749.4	1749.4	1749.4	1749.4	1749.4	1749.4		0	0	0	0	0	0	0	0	0	0	0	0		0	0	0	0	0	0		0	0	0	0	0	0		0	0	0	0	0	0
604	2021-09-15	1754.6	1754.6	1754.6	1754.6	1754.6	1754.6	1754.6		0	0	0	0	0	0	0	0	0	0	0	0		0	0	0	0	0	0		0	0	0	0	0	0		0	0	0	0	0	0
605	2021-09-14	1792.4	1792.4	1792.4	1792.4	1792.4	1792.4	1792.4		0	0	0	0	0	0	0	0	0	0	0	0		0	0	0	0	0	0		0	0	0	0	0	0		0	0	0	0	0	0
606	2021-09-13	1804.7	1804.7	1804.7	1804.7	1804.7	1804.7	1804.7		0	0	0	0	0	0	0	0	0	0	0	0		0	0	0	0	0	0		0	0	0	0	0	0		0	0	0	0	0	0
607	2021-09-12	1792	1792.0	1792.0	1792.0	1792.0	1792.0	1792.0		0	0	0	0	0	0	0	0	0	0	0	0		0	0	0	0	0	0		0	0	0	0	0	0		0	0	0	0	0	0
608	2021-09-09	1789.6	1789.6	1789.6	1789.6	1789.6	1789.6	1789.6		0	0	0	0	0	0	0	0	0	0	0	0		0	0	0	0	0	0		0	0	0	0	0	0		0	0	0	0	0	0
609	2021-09-08	1797.4	1797.4	1797.4	1797.4	1797.4	1797.4	1797.4		0	0	0	0	0	0	0	0	0	0	0	0		0	0	0	0	0	0		0	0	0	0	0	0		0	0	0	0	0	0
610	2021-09-07	1790.7	1790.7	1790.7	1790.7	1790.7	1790.7	1790.7		0	0	0	0	0	0	0	0	0	0	0	0		0	0	0	0	0	0		0	0	0	0	0	0		0	0	0	0	0	0
611	2021-09-06	1795.9	1795.9	1795.9	1795.9	1795.9	1795.9	1795.9		0	0	0	0	0	0	0	0	0	0	0	0		0	0	0	0	0	0		0	0	0	0	0	0		0	0	0	0	0	0
612	2021-09-02	1830.9	1830.9	1830.9	1830.9	1830.9	1830.9	1830.9		0	0	0	0	0	0	0	0	0	0	0	0		0	0	0	0	0	0		0	0	0	0	0	0		0	0	0	0	0	0
613	2021-09-01	1808.7	1808.7	1808.7	1808.7	1808.7	1808.7	1808.7		0	0	0	0	0	0	0	0	0	0	0	0		0	0	0	0	0	0		0	0	0	0	0	0		0	0	0	0	0	0
614	2021-08-31	1813.1	1813.1	1813.1	1813.1	1813.1	1813.1	1813.1		0	0	0	0	0	0	0	0	0	0	0	0		0	0	0	0	0	0		0	0	0	0	0	0		0	0	0	0	0	0
615	2021-08-30	1815	1815.0	1815.0	1815.0	1815.0	1815.0	1815.0		0	0	0	0	0	0	0	0	0	0	0	0		0	0	0	0	0	0		0	0	0	0	0	0		0	0	0	0	0	0
616	2021-08-29	1809	1809.0	1809.0	1809.0	1809.0	1809.0	1809.0		0	0	0	0	0	0	0	0	0	0	0	0		0	0	0	0	0	0		0	0	0	0	0	0		0	0	0	0	0	0
617	2021-08-26	1816.6	1816.6	1816.6	1816.6	1816.6	1816.6	1816.6		0	0	0	0	0	0	0	0	0	0	0	0		0	0	0	0	0	0		0	0	0	0	0	0		0	0	0	0	0	0
618	2021-08-25	1792.2	1792.2	1792.2	1792.2	1792.2	1792.2	1792.2		0	0	0	0	0	0	0	0	0	0	0	0		0	0	0	0	0	0		0	0	0	0	0	0		0	0	0	0	0	0
619	2021-08-24	1788.2	1788.2	1788.2	1788.2	1788.2	1788.2	1788.2		0	0	0	0	0	0	0	0	0	0	0	0		0	0	0	0	0	0		0	0	0	0	0	0		0	0	0	0	0	0
620	2021-08-23	1805.6	1805.6	1805.6	1805.6	1805.6	1805.6	1805.6		0	0	0	0	0	0	0	0	0	0	0	0		0	0	0	0	0	0		0	0	0	0	0	0		0	0	0	0	0	0
621	2021-08-22	1803.2	1803.2	1803.2	1803.2	1803.2	1803.2	1803.2		0	0	0	0	0	0	0	0	0	0	0	0		0	0	0	0	0	0		0	0	0	0	0	0		0	0	0	0	0	0
622	2021-08-19	1781	1781.0	1781.0	1781.0	1781.0	1781.0	1781.0		0	0	0	0	0	0	0	0	0	0	0	0		0	0	0	0	0	0		0	0	0	0	0	0		0	0	0	0	0	0
623	2021-08-18	1780.2	1780.2	1780.2	1780.2	1780.2	1780.2	1780.2		0	0	0	0	0	0	0	0	0	0	0	0		0	0	0	0	0	0		0	0	0	0	0	0		0	0	0	0	0	0
624	2021-08-17	1781.6	1109.887	1784.743	1785.367	1783.664	1782.6	1193.603		-671.713	671.713	3.143	3.143	3.767	3.767	2.064	2.064	1	1	-587.997	587.997		451198	9.87845	14.1903	4.2601	1	345740		0.377028	-0.00176414	-0.00211439	-0.00115851	-0.000561293	0.330039		0.377028	0.00176414	0.00211439	0.00115851	0.000561293	0.330039
625	2021-08-16	1785	1785.0	1785.0	1785.0	1785.0	1785.0	1785.0		0	0	0	0	0	0	0	0	0	0	0	0		0	0	0	0	0	0		0	0	0	0	0	0		0	0	0	0	0	0
626	2021-08-15	1786.9	1786.9	1786.9	1786.9	1786.9	1786.9	1786.9		0	0	0	0	0	0	0	0	0	0	0	0		0	0	0	0	0	0		0	0	0	0	0	0		0	0	0	0	0	0
627	2021-08-12	1775.2	1775.2	1775.2	1775.2	1775.2	1775.2	1775.2		0	0	0	0	0	0	0	0	0	0	0	0		0	0	0	0	0	0		0	0	0	0	0	0		0	0	0	0	0	0
628	2021-08-11	1749	1749.0	1749.0	1749.0	1749.0	1749.0	1749.0		0	0	0	0	0	0	0	0	0	0	0	0		0	0	0	0	0	0		0	0	0	0	0	0		0	0	0	0	0	0
629	2021-08-10	1750.4	1750.4	1750.4	1750.4	1750.4	1750.4	1750.4		0	0	0	0	0	0	0	0	0	0	0	0		0	0	0	0	0	0		0	0	0	0	0	0		0	0	0	0	0	0
630	2021-08-09	1728.8	1728.8	1728.8	1728.8	1728.8	1728.8	1728.8		0	0	0	0	0	0	0	0	0	0	0	0		0	0	0	0	0	0		0	0	0	0	0	0		0	0	0	0	0	0
631	2021-08-08	1723.4	1723.4	1723.4	1723.4	1723.4	1723.4	1723.4		0	0	0	0	0	0	0	0	0	0	0	0		0	0	0	0	0	0		0	0	0	0	0	0		0	0	0	0	0	0
632	2021-08-05	1760	1760.0	1760.0	1760.0	1760.0	1760.0	1760.0		0	0	0	0	0	0	0	0	0	0	0	0		0	0	0	0	0	0		0	0	0	0	0	0		0	0	0	0	0	0
633	2021-08-04	1805.1	1805.1	1805.1	1805.1	1805.1	1805.1	1805.1		0	0	0	0	0	0	0	0	0	0	0	0		0	0	0	0	0	0		0	0	0	0	0	0		0	0	0	0	0	0
634	2021-08-03	1810.5	1109.887	1816.329	1828.6	1821.409	1807.6	1196.812		-700.613	700.613	5.829	5.829	18.1	18.1	10.909	10.909	-2.9	2.9	-613.688	613.688		490859	33.9772	327.61	119.006	8.41	376613		0.386972	-0.00321955	-0.00999724	-0.00602541	0.00160177	0.338961		0.386972	0.00321955	0.00999724	0.00602541	0.00160177	0.338961
635	2021-08-02	1810.1	1810.1	1810.1	1810.1	1810.1	1810.1	1810.1		0	0	0	0	0	0	0	0	0	0	0	0		0	0	0	0	0	0		0	0	0	0	0	0		0	0	0	0	0	0
636	2021-08-01	1818.1	1818.1	1818.1	1818.1	1818.1	1818.1	1818.1		0	0	0	0	0	0	0	0	0	0	0	0		0	0	0	0	0	0		0	0	0	0	0	0		0	0	0	0	0	0
637	2021-07-29	1812.6	1812.6	1812.6	1812.6	1812.6	1812.6	1812.6		0	0	0	0	0	0	0	0	0	0	0	0		0	0	0	0	0	0		0	0	0	0	0	0		0	0	0	0	0	0
638	2021-07-28	1831.2	1831.2	1831.2	1831.2	1831.2	1831.2	1831.2		0	0	0	0	0	0	0	0	0	0	0	0		0	0	0	0	0	0		0	0	0	0	0	0		0	0	0	0	0	0
639	2021-07-27	1799.5	1799.5	1799.5	1799.5	1799.5	1799.5	1799.5		0	0	0	0	0	0	0	0	0	0	0	0		0	0	0	0	0	0		0	0	0	0	0	0		0	0	0	0	0	0
640	2021-07-26	1799.5	1799.5	1799.5	1799.5	1799.5	1799.5	1799.5		0	0	0	0	0	0	0	0	0	0	0	0		0	0	0	0	0	0		0	0	0	0	0	0		0	0	0	0	0	0
641	2021-07-25	1798.7	1798.7	1798.7	1798.7	1798.7	1798.7	1798.7		0	0	0	0	0	0	0	0	0	0	0	0		0	0	0	0	0	0		0	0	0	0	0	0		0	0	0	0	0	0
642	2021-07-22	1801.4	1801.4	1801.4	1801.4	1801.4	1801.4	1801.4		0	0	0	0	0	0	0	0	0	0	0	0		0	0	0	0	0	0		0	0	0	0	0	0		0	0	0	0	0	0
643	2021-07-21	1805	1109.887	1800.700	1797.633	1799.749	1804.567	1194.867		-695.113	695.113	-4.3	4.3	-7.367	7.367	-5.251	5.251	-0.433	0.433	-610.133	610.133		483182	18.49	54.2727	27.573	0.187489	372262		0.385104	0.00238227	0.00408144	0.00290914	0.000239889	0.338024		0.385104	0.00238227	0.00408144	0.00290914	0.000239889	0.338024
644	2021-07-20	1802.9	1109.887	1808.467	1801.933	1802.297	1807.733	1195.656		-693.013	693.013	5.567	5.567	-0.967	0.967	-0.603	0.603	4.833	4.833	-607.244	607.244		480267	30.9915	0.935089	0.363609	23.3579	368745		0.384388	-0.0030878	0.000536358	0.000334461	-0.00268068	0.336815		0.384388	0.0030878	0.000536358	0.000334461	0.00268068	0.336815
645	2021-07-19	1810.9	1810.9	1810.9	1810.9	1810.9	1810.9	1810.9		0	0	0	0	0	0	0	0	0	0	0	0		0	0	0	0	0	0		0	0	0	0	0	0		0	0	0	0	0	0
646	2021-07-18	1808.7	1808.7	1808.7	1808.7	1808.7	1808.7	1808.7		0	0	0	0	0	0	0	0	0	0	0	0		0	0	0	0	0	0		0	0	0	0	0	0		0	0	0	0	0	0
647	2021-07-15	1814.5	1109.887	1828.764	1823.833	1823.155	1823.475	1197.807		-704.613	704.613	14.264	14.264	9.333	9.333	8.655	8.655	8.975	8.975	-616.693	616.693		496479	203.462	87.1049	74.909	80.5506	380310		0.388324	-0.00786112	-0.00514357	-0.00476991	-0.00494627	0.339869		0.388324	0.00786112	0.00514357	0.00476991	0.00494627	0.339869
648	2021-07-14	1828.4	1828.4	1828.4	1828.4	1828.4	1828.4	1828.4		0	0	0	0	0	0	0	0	0	0	0	0		0	0	0	0	0	0		0	0	0	0	0	0		0	0	0	0	0	0
649	2021-07-13	1824.3	1824.3	1824.3	1824.3	1824.3	1824.3	1824.3		0	0	0	0	0	0	0	0	0	0	0	0		0	0	0	0	0	0		0	0	0	0	0	0		0	0	0	0	0	0
650	2021-07-12	1809.4	1809.4	1809.4	1809.4	1809.4	1809.4	1809.4		0	0	0	0	0	0	0	0	0	0	0	0		0	0	0	0	0	0		0	0	0	0	0	0		0	0	0	0	0	0
651	2021-07-11	1805.5	1805.5	1805.5	1805.5	1805.5	1805.5	1805.5		0	0	0	0	0	0	0	0	0	0	0	0		0	0	0	0	0	0		0	0	0	0	0	0		0	0	0	0	0	0
652	2021-07-08	1810	1810.0	1810.0	1810.0	1810.0	1810.0	1810.0		0	0	0	0	0	0	0	0	0	0	0	0		0	0	0	0	0	0		0	0	0	0	0	0		0	0	0	0	0	0
653	2021-07-07	1799.6	1799.6	1799.6	1799.6	1799.6	1799.6	1799.6		0	0	0	0	0	0	0	0	0	0	0	0		0	0	0	0	0	0		0	0	0	0	0	0		0	0	0	0	0	0
654	2021-07-06	1801.5	1801.5	1801.5	1801.5	1801.5	1801.5	1801.5		0	0	0	0	0	0	0	0	0	0	0	0		0	0	0	0	0	0		0	0	0	0	0	0		0	0	0	0	0	0
655	2021-07-05	1793.5	1793.5	1793.5	1793.5	1793.5	1793.5	1793.5		0	0	0	0	0	0	0	0	0	0	0	0		0	0	0	0	0	0		0	0	0	0	0	0		0	0	0	0	0	0
656	2021-07-01	1782.6	1782.6	1782.6	1782.6	1782.6	1782.6	1782.6		0	0	0	0	0	0	0	0	0	0	0	0		0	0	0	0	0	0		0	0	0	0	0	0		0	0	0	0	0	0
657	2021-06-30	1775.9	1775.9	1775.9	1775.9	1775.9	1775.9	1775.9		0	0	0	0	0	0	0	0	0	0	0	0		0	0	0	0	0	0		0	0	0	0	0	0		0	0	0	0	0	0
658	2021-06-29	1770.8	1770.8	1770.8	1770.8	1770.8	1770.8	1770.8		0	0	0	0	0	0	0	0	0	0	0	0		0	0	0	0	0	0		0	0	0	0	0	0		0	0	0	0	0	0
659	2021-06-28	1762.8	1762.8	1762.8	1762.8	1762.8	1762.8	1762.8		0	0	0	0	0	0	0	0	0	0	0	0		0	0	0	0	0	0		0	0	0	0	0	0		0	0	0	0	0	0
660	2021-06-27	1779.6	1779.6	1779.6	1779.6	1779.6	1779.6	1779.6		0	0	0	0	0	0	0	0	0	0	0	0		0	0	0	0	0	0		0	0	0	0	0	0		0	0	0	0	0	0
661	2021-06-24	1776.6	1776.6	1776.6	1776.6	1776.6	1776.6	1776.6		0	0	0	0	0	0	0	0	0	0	0	0		0	0	0	0	0	0		0	0	0	0	0	0		0	0	0	0	0	0
662	2021-06-23	1775.6	1775.6	1775.6	1775.6	1775.6	1775.6	1775.6		0	0	0	0	0	0	0	0	0	0	0	0		0	0	0	0	0	0		0	0	0	0	0	0		0	0	0	0	0	0
663	2021-06-22	1782.3	1782.3	1782.3	1782.3	1782.3	1782.3	1782.3		0	0	0	0	0	0	0	0	0	0	0	0		0	0	0	0	0	0		0	0	0	0	0	0		0	0	0	0	0	0
664	2021-06-21	1776.3	1776.3	1776.3	1776.3	1776.3	1776.3	1776.3		0	0	0	0	0	0	0	0	0	0	0	0		0	0	0	0	0	0		0	0	0	0	0	0		0	0	0	0	0	0
665	2021-06-20	1781.8	1781.8	1781.8	1781.8	1781.8	1781.8	1781.8		0	0	0	0	0	0	0	0	0	0	0	0		0	0	0	0	0	0		0	0	0	0	0	0		0	0	0	0	0	0
666	2021-06-17	1767.9	1767.9	1767.9	1767.9	1767.9	1767.9	1767.9		0	0	0	0	0	0	0	0	0	0	0	0		0	0	0	0	0	0		0	0	0	0	0	0		0	0	0	0	0	0
667	2021-06-16	1773.8	1773.8	1773.8	1773.8	1773.8	1773.8	1773.8		0	0	0	0	0	0	0	0	0	0	0	0		0	0	0	0	0	0		0	0	0	0	0	0		0	0	0	0	0	0
668	2021-06-15	1859.5	1859.5	1859.5	1859.5	1859.5	1859.5	1859.5		0	0	0	0	0	0	0	0	0	0	0	0		0	0	0	0	0	0		0	0	0	0	0	0		0	0	0	0	0	0
669	2021-06-14	1854.5	1854.5	1854.5	1854.5	1854.5	1854.5	1854.5		0	0	0	0	0	0	0	0	0	0	0	0		0	0	0	0	0	0		0	0	0	0	0	0		0	0	0	0	0	0
670	2021-06-13	1864	1864.0	1864.0	1864.0	1864.0	1864.0	1864.0		0	0	0	0	0	0	0	0	0	0	0	0		0	0	0	0	0	0		0	0	0	0	0	0		0	0	0	0	0	0
671	2021-06-10	1877.4	1109.887	1892.800	1887.467	1889.679	1886.650	1203.623		-767.513	767.513	15.4	15.4	10.067	10.067	12.279	12.279	9.25	9.25	-673.777	673.777		589076	237.16	101.344	150.774	85.5625	453975		0.408817	-0.00820283	-0.0053622	-0.00654043	-0.00492703	0.358888		0.408817	0.00820283	0.0053622	0.00654043	0.00492703	0.358888
672	2021-06-09	1894.2	1894.2	1894.2	1894.2	1894.2	1894.2	1894.2		0	0	0	0	0	0	0	0	0	0	0	0		0	0	0	0	0	0		0	0	0	0	0	0		0	0	0	0	0	0
673	2021-06-08	1893.2	1109.887	1892.800	1893.9	1894.706	1893.2	1203.717		-783.313	783.313	-0.4	0.4	0.7	0.7	1.506	1.506	0	0	-689.483	689.483		613579	0.16	0.49	2.26804	0	475387		0.413751	0.000211282	-0.000369744	-0.000795479	0	0.364189		0.413751	0.000211282	0.000369744	0.000795479	0	0.364189
674	2021-06-07	1892.2	1892.2	1892.2	1892.2	1892.2	1892.2	1892.2		0	0	0	0	0	0	0	0	0	0	0	0		0	0	0	0	0	0		0	0	0	0	0	0		0	0	0	0	0	0
675	2021-06-06	1896.8	1896.8	1896.8	1896.8	1896.8	1896.8	1896.8		0	0	0	0	0	0	0	0	0	0	0	0		0	0	0	0	0	0		0	0	0	0	0	0		0	0	0	0	0	0
676	2021-06-03	1889.8	1889.8	1889.8	1889.8	1889.8	1889.8	1889.8		0	0	0	0	0	0	0	0	0	0	0	0		0	0	0	0	0	0		0	0	0	0	0	0		0	0	0	0	0	0
677	2021-06-02	1871.2	1109.887	1862.130	1879.333	1872.856	1898.650	1203.670		-761.313	761.313	-9.07	9.07	8.133	8.133	1.656	1.656	27.45	27.45	-667.53	667.53		579597	82.2649	66.1457	2.74234	753.503	445596		0.406858	0.00484716	-0.00434641	-0.000884994	-0.0146697	0.356739		0.406858	0.00484716	0.00434641	0.000884994	0.0146697	0.356739
678	2021-06-01	1907.5	1907.5	1907.5	1907.5	1907.5	1907.5	1907.5		0	0	0	0	0	0	0	0	0	0	0	0		0	0	0	0	0	0		0	0	0	0	0	0		0	0	0	0	0	0
679	2021-05-31	1902.9	1902.9	1902.9	1902.9	1902.9	1902.9	1902.9		0	0	0	0	0	0	0	0	0	0	0	0		0	0	0	0	0	0		0	0	0	0	0	0		0	0	0	0	0	0
680	2021-05-27	1902.5	1902.5	1902.5	1902.5	1902.5	1902.5	1902.5		0	0	0	0	0	0	0	0	0	0	0	0		0	0	0	0	0	0		0	0	0	0	0	0		0	0	0	0	0	0
681	2021-05-26	1895.7	1895.7	1895.7	1895.7	1895.7	1895.7	1895.7		0	0	0	0	0	0	0	0	0	0	0	0		0	0	0	0	0	0		0	0	0	0	0	0		0	0	0	0	0	0
682	2021-05-25	1901.3	1901.3	1901.3	1901.3	1901.3	1901.3	1901.3		0	0	0	0	0	0	0	0	0	0	0	0		0	0	0	0	0	0		0	0	0	0	0	0		0	0	0	0	0	0
683	2021-05-24	1898.1	1898.1	1898.1	1898.1	1898.1	1898.1	1898.1		0	0	0	0	0	0	0	0	0	0	0	0		0	0	0	0	0	0		0	0	0	0	0	0		0	0	0	0	0	0
684	2021-05-23	1884.6	1884.6	1884.6	1884.6	1884.6	1884.6	1884.6		0	0	0	0	0	0	0	0	0	0	0	0		0	0	0	0	0	0		0	0	0	0	0	0		0	0	0	0	0	0
685	2021-05-20	1876.7	1876.7	1876.7	1876.7	1876.7	1876.7	1876.7		0	0	0	0	0	0	0	0	0	0	0	0		0	0	0	0	0	0		0	0	0	0	0	0		0	0	0	0	0	0
686	2021-05-19	1881.8	1881.8	1881.8	1881.8	1881.8	1881.8	1881.8		0	0	0	0	0	0	0	0	0	0	0	0		0	0	0	0	0	0		0	0	0	0	0	0		0	0	0	0	0	0
687	2021-05-18	1881.3	1881.3	1881.3	1881.3	1881.3	1881.3	1881.3		0	0	0	0	0	0	0	0	0	0	0	0		0	0	0	0	0	0		0	0	0	0	0	0		0	0	0	0	0	0
688	2021-05-17	1867.8	1867.8	1867.8	1867.8	1867.8	1867.8	1867.8		0	0	0	0	0	0	0	0	0	0	0	0		0	0	0	0	0	0		0	0	0	0	0	0		0	0	0	0	0	0
689	2021-05-16	1867.5	1867.5	1867.5	1867.5	1867.5	1867.5	1867.5		0	0	0	0	0	0	0	0	0	0	0	0		0	0	0	0	0	0		0	0	0	0	0	0		0	0	0	0	0	0
690	2021-05-13	1837.9	1837.9	1837.9	1837.9	1837.9	1837.9	1837.9		0	0	0	0	0	0	0	0	0	0	0	0		0	0	0	0	0	0		0	0	0	0	0	0		0	0	0	0	0	0
691	2021-05-12	1823.8	1823.8	1823.8	1823.8	1823.8	1823.8	1823.8		0	0	0	0	0	0	0	0	0	0	0	0		0	0	0	0	0	0		0	0	0	0	0	0		0	0	0	0	0	0
692	2021-05-11	1822.6	1822.6	1822.6	1822.6	1822.6	1822.6	1822.6		0	0	0	0	0	0	0	0	0	0	0	0		0	0	0	0	0	0		0	0	0	0	0	0		0	0	0	0	0	0
693	2021-05-10	1835.9	1109.887	1828.764	1837.367	1832.813	1830.050	1198.821		-726.013	726.013	-7.136	7.136	1.467	1.467	-3.087	3.087	-5.85	5.85	-637.079	637.079		527095	50.9225	2.15209	9.52957	34.2225	405870		0.395453	0.00388692	-0.000799063	0.00168146	0.00318645	0.347012		0.395453	0.00388692	0.000799063	0.00168146	0.00318645	0.347012
694	2021-05-09	1837.5	1837.5	1837.5	1837.5	1837.5	1837.5	1837.5		0	0	0	0	0	0	0	0	0	0	0	0		0	0	0	0	0	0		0	0	0	0	0	0		0	0	0	0	0	0
695	2021-05-06	1831.1	1831.1	1831.1	1831.1	1831.1	1831.1	1831.1		0	0	0	0	0	0	0	0	0	0	0	0		0	0	0	0	0	0		0	0	0	0	0	0		0	0	0	0	0	0
696	2021-05-05	1815.5	1815.5	1815.5	1815.5	1815.5	1815.5	1815.5		0	0	0	0	0	0	0	0	0	0	0	0		0	0	0	0	0	0		0	0	0	0	0	0		0	0	0	0	0	0
697	2021-05-04	1784.1	1784.1	1784.1	1784.1	1784.1	1784.1	1784.1		0	0	0	0	0	0	0	0	0	0	0	0		0	0	0	0	0	0		0	0	0	0	0	0		0	0	0	0	0	0
698	2021-05-03	1775.8	1775.8	1775.8	1775.8	1775.8	1775.8	1775.8		0	0	0	0	0	0	0	0	0	0	0	0		0	0	0	0	0	0		0	0	0	0	0	0		0	0	0	0	0	0
699	2021-05-02	1791.4	1109.887	1787.691	1790.4	1791.807	1773.675	1194.041		-681.513	681.513	-3.709	3.709	-1	1	0.407	0.407	-17.725	17.725	-597.359	597.359		464460	13.7567	1	0.165649	314.176	356838		0.380436	0.00207045	0.000558223	-0.000227197	0.0098945	0.333459		0.380436	0.00207045	0.000558223	0.000227197	0.0098945	0.333459
700	2021-04-29	1767.3	1767.3	1767.3	1767.3	1767.3	1767.3	1767.3		0	0	0	0	0	0	0	0	0	0	0	0		0	0	0	0	0	0		0	0	0	0	0	0		0	0	0	0	0	0
701	2021-04-28	1768.1	1768.1	1768.1	1768.1	1768.1	1768.1	1768.1		0	0	0	0	0	0	0	0	0	0	0	0		0	0	0	0	0	0		0	0	0	0	0	0		0	0	0	0	0	0
702	2021-04-27	1773.2	1773.2	1773.2	1773.2	1773.2	1773.2	1773.2		0	0	0	0	0	0	0	0	0	0	0	0		0	0	0	0	0	0		0	0	0	0	0	0		0	0	0	0	0	0
703	2021-04-26	1778	1778.0	1778.0	1778.0	1778.0	1778.0	1778.0		0	0	0	0	0	0	0	0	0	0	0	0		0	0	0	0	0	0		0	0	0	0	0	0		0	0	0	0	0	0
704	2021-04-25	1779.2	1779.2	1779.2	1779.2	1779.2	1779.2	1779.2		0	0	0	0	0	0	0	0	0	0	0	0		0	0	0	0	0	0		0	0	0	0	0	0		0	0	0	0	0	0
705	2021-04-22	1777	1777.0	1777.0	1777.0	1777.0	1777.0	1777.0		0	0	0	0	0	0	0	0	0	0	0	0		0	0	0	0	0	0		0	0	0	0	0	0		0	0	0	0	0	0
706	2021-04-21	1781.2	1781.2	1781.2	1781.2	1781.2	1781.2	1781.2		0	0	0	0	0	0	0	0	0	0	0	0		0	0	0	0	0	0		0	0	0	0	0	0		0	0	0	0	0	0
707	2021-04-20	1792.3	1792.3	1792.3	1792.3	1792.3	1792.3	1792.3		0	0	0	0	0	0	0	0	0	0	0	0		0	0	0	0	0	0		0	0	0	0	0	0		0	0	0	0	0	0
708	2021-04-19	1777.3	1777.3	1777.3	1777.3	1777.3	1777.3	1777.3		0	0	0	0	0	0	0	0	0	0	0	0		0	0	0	0	0	0		0	0	0	0	0	0		0	0	0	0	0	0
709	2021-04-18	1769.4	1769.4	1769.4	1769.4	1769.4	1769.4	1769.4		0	0	0	0	0	0	0	0	0	0	0	0		0	0	0	0	0	0		0	0	0	0	0	0		0	0	0	0	0	0
710	2021-04-15	1779	1779.0	1779.0	1779.0	1779.0	1779.0	1779.0		0	0	0	0	0	0	0	0	0	0	0	0		0	0	0	0	0	0		0	0	0	0	0	0		0	0	0	0	0	0
711	2021-04-14	1765.4	1109.887	1752.725	1749.933	1755.390	1756.950	1189.232		-655.513	655.513	-12.675	12.675	-15.467	15.467	-10.01	10.01	-8.45	8.45	-576.168	576.168		429697	160.656	239.228	100.2	71.4025	331970		0.371311	0.00717968	0.00876119	0.0056701	0.00478645	0.326367		0.371311	0.00717968	0.00876119	0.0056701	0.00478645	0.326367
712	2021-04-13	1734.9	1734.9	1734.9	1734.9	1734.9	1734.9	1734.9		0	0	0	0	0	0	0	0	0	0	0	0		0	0	0	0	0	0		0	0	0	0	0	0		0	0	0	0	0	0
713	2021-04-12	1746.2	1746.2	1746.2	1746.2	1746.2	1746.2	1746.2		0	0	0	0	0	0	0	0	0	0	0	0		0	0	0	0	0	0		0	0	0	0	0	0		0	0	0	0	0	0
714	2021-04-11	1731.2	1109.887	1733.100	1733.467	1734.564	1745.475	1187.591		-621.313	621.313	1.9	1.9	2.267	2.267	3.364	3.364	14.275	14.275	-543.609	543.609		386030	3.61	5.13929	11.3165	203.776	295511		0.358892	-0.0010975	-0.0013095	-0.00194316	-0.00824573	0.314007		0.358892	0.0010975	0.0013095	0.00194316	0.00824573	0.314007
715	2021-04-08	1743.3	1743.3	1743.3	1743.3	1743.3	1743.3	1743.3		0	0	0	0	0	0	0	0	0	0	0	0		0	0	0	0	0	0		0	0	0	0	0	0		0	0	0	0	0	0
716	2021-04-07	1756.8	1756.8	1756.8	1756.8	1756.8	1756.8	1756.8		0	0	0	0	0	0	0	0	0	0	0	0		0	0	0	0	0	0		0	0	0	0	0	0		0	0	0	0	0	0
717	2021-04-06	1740.1	1740.1	1740.1	1740.1	1740.1	1740.1	1740.1		0	0	0	0	0	0	0	0	0	0	0	0		0	0	0	0	0	0		0	0	0	0	0	0		0	0	0	0	0	0
718	2021-04-05	1741.5	1741.5	1741.5	1741.5	1741.5	1741.5	1741.5		0	0	0	0	0	0	0	0	0	0	0	0		0	0	0	0	0	0		0	0	0	0	0	0		0	0	0	0	0	0
719	2021-04-04	1727	1727.0	1727.0	1727.0	1727.0	1727.0	1727.0		0	0	0	0	0	0	0	0	0	0	0	0		0	0	0	0	0	0		0	0	0	0	0	0		0	0	0	0	0	0
720	2021-03-31	1726.5	1726.5	1726.5	1726.5	1726.5	1726.5	1726.5		0	0	0	0	0	0	0	0	0	0	0	0		0	0	0	0	0	0		0	0	0	0	0	0		0	0	0	0	0	0
721	2021-03-30	1713.8	1713.8	1713.8	1713.8	1713.8	1713.8	1713.8		0	0	0	0	0	0	0	0	0	0	0	0		0	0	0	0	0	0		0	0	0	0	0	0		0	0	0	0	0	0
722	2021-03-29	1683.9	1683.9	1683.9	1683.9	1683.9	1683.9	1683.9		0	0	0	0	0	0	0	0	0	0	0	0		0	0	0	0	0	0		0	0	0	0	0	0		0	0	0	0	0	0
723	2021-03-28	1712.1	1109.887	1718.960	1710.667	1711.855	1695.975	1184.518		-602.213	602.213	6.86	6.86	-1.433	1.433	-0.245	0.245	-16.125	16.125	-527.582	527.582		362660	47.0596	2.05349	0.060025	260.016	278343		0.351739	-0.00400678	0.000836984	0.000143099	0.00941826	0.308149		0.351739	0.00400678	0.000836984	0.000143099	0.00941826	0.308149
724	2021-03-25	1732.2	1732.2	1732.2	1732.2	1732.2	1732.2	1732.2		0	0	0	0	0	0	0	0	0	0	0	0		0	0	0	0	0	0		0	0	0	0	0	0		0	0	0	0	0	0
725	2021-03-24	1724.9	1724.9	1724.9	1724.9	1724.9	1724.9	1724.9		0	0	0	0	0	0	0	0	0	0	0	0		0	0	0	0	0	0		0	0	0	0	0	0		0	0	0	0	0	0
726	2021-03-23	1732.9	1109.887	1733.100	1731.5	1730.604	1724.8	1186.733		-623.013	623.013	0.2	0.2	-1.4	1.4	-2.296	2.296	-8.1	8.1	-546.167	546.167		388145	0.04	1.96	5.27162	65.61	298298		0.35952	-0.000115413	0.000807894	0.00132495	0.00467425	0.315175		0.35952	0.000115413	0.000807894	0.00132495	0.00467425	0.315175
727	2021-03-22	1724.7	1724.7	1724.7	1724.7	1724.7	1724.7	1724.7		0	0	0	0	0	0	0	0	0	0	0	0		0	0	0	0	0	0		0	0	0	0	0	0		0	0	0	0	0	0
728	2021-03-21	1737.8	1737.8	1737.8	1737.8	1737.8	1737.8	1737.8		0	0	0	0	0	0	0	0	0	0	0	0		0	0	0	0	0	0		0	0	0	0	0	0		0	0	0	0	0	0
729	2021-03-18	1741.4	1741.4	1741.4	1741.4	1741.4	1741.4	1741.4		0	0	0	0	0	0	0	0	0	0	0	0		0	0	0	0	0	0		0	0	0	0	0	0		0	0	0	0	0	0
730	2021-03-17	1732.2	1732.2	1732.2	1732.2	1732.2	1732.2	1732.2		0	0	0	0	0	0	0	0	0	0	0	0		0	0	0	0	0	0		0	0	0	0	0	0		0	0	0	0	0	0
731	2021-03-16	1726.8	1726.8	1726.8	1726.8	1726.8	1726.8	1726.8		0	0	0	0	0	0	0	0	0	0	0	0		0	0	0	0	0	0		0	0	0	0	0	0		0	0	0	0	0	0
732	2021-03-15	1730.6	1109.887	1733.100	1727.967	1730.360	1725.9	1186.915		-620.713	620.713	2.5	2.5	-2.633	2.633	-0.24	0.24	-4.7	4.7	-543.685	543.685		385285	6.25	6.93269	0.0576	22.09	295593		0.358669	-0.00144459	0.00152144	0.00013868	0.00271582	0.31416		0.358669	0.00144459	0.00152144	0.00013868	0.00271582	0.31416
733	2021-03-14	1728.9	1109.887	1727.422	1725.5	1725.598	1725.0	1186.577		-619.013	619.013	-1.478	1.478	-3.4	3.4	-3.302	3.302	-3.9	3.9	-542.323	542.323		383177	2.18448	11.56	10.9032	15.21	294114		0.358039	0.000854879	0.00196657	0.00190988	0.00225577	0.313681		0.358039	0.000854879	0.00196657	0.00190988	0.00225577	0.313681
734	2021-03-12	1719.5	1109.887	1702.878	1711.4	1707.202	1723.2	1184.564		-609.613	609.613	-16.622	16.622	-8.1	8.1	-12.298	12.298	3.7	3.7	-534.936	534.936		371628	276.291	65.61	151.241	13.69	286157		0.354529	0.00966676	0.00471067	0.00715208	-0.00215179	0.3111		0.354529	0.00966676	0.00471067	0.00715208	0.00215179	0.3111
735	2021-03-11	1722.3	1722.3	1722.3	1722.3	1722.3	1722.3	1722.3		0	0	0	0	0	0	0	0	0	0	0	0		0	0	0	0	0	0		0	0	0	0	0	0		0	0	0	0	0	0
736	2021-03-10	1721.5	1721.5	1721.5	1721.5	1721.5	1721.5	1721.5		0	0	0	0	0	0	0	0	0	0	0	0		0	0	0	0	0	0		0	0	0	0	0	0		0	0	0	0	0	0
737	2021-03-09	1716.6	1716.6	1716.6	1716.6	1716.6	1716.6	1716.6		0	0	0	0	0	0	0	0	0	0	0	0		0	0	0	0	0	0		0	0	0	0	0	0		0	0	0	0	0	0
738	2021-03-08	1677.7	1677.7	1677.7	1677.7	1677.7	1677.7	1677.7		0	0	0	0	0	0	0	0	0	0	0	0		0	0	0	0	0	0		0	0	0	0	0	0		0	0	0	0	0	0
739	2021-03-05	1698	1698.0	1698.0	1698.0	1698.0	1698.0	1698.0		0	0	0	0	0	0	0	0	0	0	0	0		0	0	0	0	0	0		0	0	0	0	0	0		0	0	0	0	0	0
740	2021-03-04	1700.2	1700.2	1700.2	1700.2	1700.2	1700.2	1700.2		0	0	0	0	0	0	0	0	0	0	0	0		0	0	0	0	0	0		0	0	0	0	0	0		0	0	0	0	0	0
741	2021-03-03	1715.3	1715.3	1715.3	1715.3	1715.3	1715.3	1715.3		0	0	0	0	0	0	0	0	0	0	0	0		0	0	0	0	0	0		0	0	0	0	0	0		0	0	0	0	0	0
742	2021-03-02	1733.1	1109.887	1720.027	1729.267	1729.746	1718.9	1185.157		-623.213	623.213	-13.073	13.073	-3.833	3.833	-3.354	3.354	-14.2	14.2	-547.943	547.943		388394	170.903	14.6919	11.2493	201.64	300242		0.359594	0.00754313	0.00221164	0.00193526	0.00819341	0.316164		0.359594	0.00754313	0.00221164	0.00193526	0.00819341	0.316164
743	2021-03-01	1722.5	1722.5	1722.5	1722.5	1722.5	1722.5	1722.5		0	0	0	0	0	0	0	0	0	0	0	0		0	0	0	0	0	0		0	0	0	0	0	0		0	0	0	0	0	0
744	2021-02-26	1728.1	1728.1	1728.1	1728.1	1728.1	1728.1	1728.1		0	0	0	0	0	0	0	0	0	0	0	0		0	0	0	0	0	0		0	0	0	0	0	0		0	0	0	0	0	0
745	2021-02-25	1774.4	1774.4	1774.4	1774.4	1774.4	1774.4	1774.4		0	0	0	0	0	0	0	0	0	0	0	0		0	0	0	0	0	0		0	0	0	0	0	0		0	0	0	0	0	0
746	2021-02-24	1796.4	1796.4	1796.4	1796.4	1796.4	1796.4	1796.4		0	0	0	0	0	0	0	0	0	0	0	0		0	0	0	0	0	0		0	0	0	0	0	0		0	0	0	0	0	0
747	2021-02-23	1804.4	1804.4	1804.4	1804.4	1804.4	1804.4	1804.4		0	0	0	0	0	0	0	0	0	0	0	0		0	0	0	0	0	0		0	0	0	0	0	0		0	0	0	0	0	0
748	2021-02-22	1806.7	1806.7	1806.7	1806.7	1806.7	1806.7	1806.7		0	0	0	0	0	0	0	0	0	0	0	0		0	0	0	0	0	0		0	0	0	0	0	0		0	0	0	0	0	0
749	2021-02-19	1775.8	1775.8	1775.8	1775.8	1775.8	1775.8	1775.8		0	0	0	0	0	0	0	0	0	0	0	0		0	0	0	0	0	0		0	0	0	0	0	0		0	0	0	0	0	0
750	2021-02-18	1773.4	1773.4	1773.4	1773.4	1773.4	1773.4	1773.4		0	0	0	0	0	0	0	0	0	0	0	0		0	0	0	0	0	0		0	0	0	0	0	0		0	0	0	0	0	0
751	2021-02-17	1771.1	1771.1	1771.1	1771.1	1771.1	1771.1	1771.1		0	0	0	0	0	0	0	0	0	0	0	0		0	0	0	0	0	0		0	0	0	0	0	0		0	0	0	0	0	0
752	2021-02-16	1797.2	1109.887	1792.438	1790.433	1791.084	1781.2	1196.249		-687.313	687.313	-4.762	4.762	-6.767	6.767	-6.116	6.116	-16	16	-600.951	600.951		472399	22.6766	45.7923	37.4055	256	361142		0.382435	0.00264968	0.0037653	0.00340307	0.00890274	0.334382		0.382435	0.00264968	0.0037653	0.00340307	0.00890274	0.334382
753	2021-02-12	1821.6	1821.6	1821.6	1821.6	1821.6	1821.6	1821.6		0	0	0	0	0	0	0	0	0	0	0	0		0	0	0	0	0	0		0	0	0	0	0	0		0	0	0	0	0	0
754	2021-02-11	1824.9	1824.9	1824.9	1824.9	1824.9	1824.9	1824.9		0	0	0	0	0	0	0	0	0	0	0	0		0	0	0	0	0	0		0	0	0	0	0	0		0	0	0	0	0	0
755	2021-02-10	1840.6	1840.6	1840.6	1840.6	1840.6	1840.6	1840.6		0	0	0	0	0	0	0	0	0	0	0	0		0	0	0	0	0	0		0	0	0	0	0	0		0	0	0	0	0	0
756	2021-02-09	1835.3	1835.3	1835.3	1835.3	1835.3	1835.3	1835.3		0	0	0	0	0	0	0	0	0	0	0	0		0	0	0	0	0	0		0	0	0	0	0	0		0	0	0	0	0	0
757	2021-02-08	1831.9	1831.9	1831.9	1831.9	1831.9	1831.9	1831.9		0	0	0	0	0	0	0	0	0	0	0	0		0	0	0	0	0	0		0	0	0	0	0	0		0	0	0	0	0	0
758	2021-02-05	1810.9	1810.9	1810.9	1810.9	1810.9	1810.9	1810.9		0	0	0	0	0	0	0	0	0	0	0	0		0	0	0	0	0	0		0	0	0	0	0	0		0	0	0	0	0	0
759	2021-02-04	1788.9	1788.9	1788.9	1788.9	1788.9	1788.9	1788.9		0	0	0	0	0	0	0	0	0	0	0	0		0	0	0	0	0	0		0	0	0	0	0	0		0	0	0	0	0	0
760	2021-02-03	1832.2	1832.2	1832.2	1832.2	1832.2	1832.2	1832.2		0	0	0	0	0	0	0	0	0	0	0	0		0	0	0	0	0	0		0	0	0	0	0	0		0	0	0	0	0	0
761	2021-02-02	1830.5	1830.5	1830.5	1830.5	1830.5	1830.5	1830.5		0	0	0	0	0	0	0	0	0	0	0	0		0	0	0	0	0	0		0	0	0	0	0	0		0	0	0	0	0	0
762	2021-02-01	1860.8	1860.8	1860.8	1860.8	1860.8	1860.8	1860.8		0	0	0	0	0	0	0	0	0	0	0	0		0	0	0	0	0	0		0	0	0	0	0	0		0	0	0	0	0	0
763	2021-01-29	1847.3	1847.3	1847.3	1847.3	1847.3	1847.3	1847.3		0	0	0	0	0	0	0	0	0	0	0	0		0	0	0	0	0	0		0	0	0	0	0	0		0	0	0	0	0	0
764	2021-01-28	1837.9	1837.9	1837.9	1837.9	1837.9	1837.9	1837.9		0	0	0	0	0	0	0	0	0	0	0	0		0	0	0	0	0	0		0	0	0	0	0	0		0	0	0	0	0	0
765	2021-01-27	1844.9	1844.9	1844.9	1844.9	1844.9	1844.9	1844.9		0	0	0	0	0	0	0	0	0	0	0	0		0	0	0	0	0	0		0	0	0	0	0	0		0	0	0	0	0	0
766	2021-01-26	1850.7	1850.7	1850.7	1850.7	1850.7	1850.7	1850.7		0	0	0	0	0	0	0	0	0	0	0	0		0	0	0	0	0	0		0	0	0	0	0	0		0	0	0	0	0	0
767	2021-01-25	1854.9	1854.9	1854.9	1854.9	1854.9	1854.9	1854.9		0	0	0	0	0	0	0	0	0	0	0	0		0	0	0	0	0	0		0	0	0	0	0	0		0	0	0	0	0	0
768	2021-01-22	1855.7	1855.7	1855.7	1855.7	1855.7	1855.7	1855.7		0	0	0	0	0	0	0	0	0	0	0	0		0	0	0	0	0	0		0	0	0	0	0	0		0	0	0	0	0	0
769	2021-01-21	1865.3	1865.3	1865.3	1865.3	1865.3	1865.3	1865.3		0	0	0	0	0	0	0	0	0	0	0	0		0	0	0	0	0	0		0	0	0	0	0	0		0	0	0	0	0	0
770	2021-01-20	1865.9	1865.9	1865.9	1865.9	1865.9	1865.9	1865.9		0	0	0	0	0	0	0	0	0	0	0	0		0	0	0	0	0	0		0	0	0	0	0	0		0	0	0	0	0	0
771	2021-01-19	1839.5	1839.5	1839.5	1839.5	1839.5	1839.5	1839.5		0	0	0	0	0	0	0	0	0	0	0	0		0	0	0	0	0	0		0	0	0	0	0	0		0	0	0	0	0	0
772	2021-01-15	1829.3	1829.3	1829.3	1829.3	1829.3	1829.3	1829.3		0	0	0	0	0	0	0	0	0	0	0	0		0	0	0	0	0	0		0	0	0	0	0	0		0	0	0	0	0	0
773	2021-01-14	1850.3	1850.3	1850.3	1850.3	1850.3	1850.3	1850.3		0	0	0	0	0	0	0	0	0	0	0	0		0	0	0	0	0	0		0	0	0	0	0	0		0	0	0	0	0	0
774	2021-01-13	1853.6	1853.6	1853.6	1853.6	1853.6	1853.6	1853.6		0	0	0	0	0	0	0	0	0	0	0	0		0	0	0	0	0	0		0	0	0	0	0	0		0	0	0	0	0	0
775	2021-01-12	1842.9	1842.9	1842.9	1842.9	1842.9	1842.9	1842.9		0	0	0	0	0	0	0	0	0	0	0	0		0	0	0	0	0	0		0	0	0	0	0	0		0	0	0	0	0	0
776	2021-01-11	1849.6	1849.6	1849.6	1849.6	1849.6	1849.6	1849.6		0	0	0	0	0	0	0	0	0	0	0	0		0	0	0	0	0	0		0	0	0	0	0	0		0	0	0	0	0	0
777	2021-01-08	1834.1	1834.1	1834.1	1834.1	1834.1	1834.1	1834.1		0	0	0	0	0	0	0	0	0	0	0	0		0	0	0	0	0	0		0	0	0	0	0	0		0	0	0	0	0	0
778	2021-01-07	1912.3	1912.3	1912.3	1912.3	1912.3	1912.3	1912.3		0	0	0	0	0	0	0	0	0	0	0	0		0	0	0	0	0	0		0	0	0	0	0	0		0	0	0	0	0	0
779	2021-01-06	1906.9	1906.9	1906.9	1906.9	1906.9	1906.9	1906.9		0	0	0	0	0	0	0	0	0	0	0	0		0	0	0	0	0	0		0	0	0	0	0	0		0	0	0	0	0	0
780	2021-01-05	1952.7	1952.7	1952.7	1952.7	1952.7	1952.7	1952.7		0	0	0	0	0	0	0	0	0	0	0	0		0	0	0	0	0	0		0	0	0	0	0	0		0	0	0	0	0	0
781	2021-01-04	1944.7	1944.7	1944.7	1944.7	1944.7	1944.7	1944.7		0	0	0	0	0	0	0	0	0	0	0	0		0	0	0	0	0	0		0	0	0	0	0	0		0	0	0	0	0	0
782	2020-12-31	1893.1	1893.1	1893.1	1893.1	1893.1	1893.1	1893.1		0	0	0	0	0	0	0	0	0	0	0	0		0	0	0	0	0	0		0	0	0	0	0	0		0	0	0	0	0	0
783	2020-12-30	1891	1891.0	1891.0	1891.0	1891.0	1891.0	1891.0		0	0	0	0	0	0	0	0	0	0	0	0		0	0	0	0	0	0		0	0	0	0	0	0		0	0	0	0	0	0
784	2020-12-29	1879.7	1879.7	1879.7	1879.7	1879.7	1879.7	1879.7		0	0	0	0	0	0	0	0	0	0	0	0		0	0	0	0	0	0		0	0	0	0	0	0		0	0	0	0	0	0
785	2020-12-28	1877.2	1877.2	1877.2	1877.2	1877.2	1877.2	1877.2		0	0	0	0	0	0	0	0	0	0	0	0		0	0	0	0	0	0		0	0	0	0	0	0		0	0	0	0	0	0
786	2020-12-24	1879.9	1109.887	1875.491	1875.3	1879.149	1875.2	1202.500		-770.013	770.013	-4.409	4.409	-4.6	4.6	-0.751	0.751	-4.7	4.7	-677.4	677.4		592920	19.4393	21.16	0.564001	22.09	458871		0.409603	0.00234534	0.00244694	0.000399489	0.00250013	0.360338		0.409603	0.00234534	0.00244694	0.000399489	0.00250013	0.360338
787	2020-12-23	1874.7	1874.7	1874.7	1874.7	1874.7	1874.7	1874.7		0	0	0	0	0	0	0	0	0	0	0	0		0	0	0	0	0	0		0	0	0	0	0	0		0	0	0	0	0	0
788	2020-12-22	1866.6	1866.6	1866.6	1866.6	1866.6	1866.6	1866.6		0	0	0	0	0	0	0	0	0	0	0	0		0	0	0	0	0	0		0	0	0	0	0	0		0	0	0	0	0	0
789	2020-12-21	1879.2	1879.2	1879.2	1879.2	1879.2	1879.2	1879.2		0	0	0	0	0	0	0	0	0	0	0	0		0	0	0	0	0	0		0	0	0	0	0	0		0	0	0	0	0	0
790	2020-12-18	1885.7	1885.7	1885.7	1885.7	1885.7	1885.7	1885.7		0	0	0	0	0	0	0	0	0	0	0	0		0	0	0	0	0	0		0	0	0	0	0	0		0	0	0	0	0	0
791	2020-12-17	1887.2	1887.2	1887.2	1887.2	1887.2	1887.2	1887.2		0	0	0	0	0	0	0	0	0	0	0	0		0	0	0	0	0	0		0	0	0	0	0	0		0	0	0	0	0	0
792	2020-12-16	1856.1	1856.1	1856.1	1856.1	1856.1	1856.1	1856.1		0	0	0	0	0	0	0	0	0	0	0	0		0	0	0	0	0	0		0	0	0	0	0	0		0	0	0	0	0	0
793	2020-12-15	1852.3	1852.3	1852.3	1852.3	1852.3	1852.3	1852.3		0	0	0	0	0	0	0	0	0	0	0	0		0	0	0	0	0	0		0	0	0	0	0	0		0	0	0	0	0	0
794	2020-12-14	1828.7	1828.7	1828.7	1828.7	1828.7	1828.7	1828.7		0	0	0	0	0	0	0	0	0	0	0	0		0	0	0	0	0	0		0	0	0	0	0	0		0	0	0	0	0	0
795	2020-12-11	1839.8	1839.8	1839.8	1839.8	1839.8	1839.8	1839.8		0	0	0	0	0	0	0	0	0	0	0	0		0	0	0	0	0	0		0	0	0	0	0	0		0	0	0	0	0	0
796	2020-12-10	1833.6	1833.6	1833.6	1833.6	1833.6	1833.6	1833.6		0	0	0	0	0	0	0	0	0	0	0	0		0	0	0	0	0	0		0	0	0	0	0	0		0	0	0	0	0	0
797	2020-12-09	1834.6	1834.6	1834.6	1834.6	1834.6	1834.6	1834.6		0	0	0	0	0	0	0	0	0	0	0	0		0	0	0	0	0	0		0	0	0	0	0	0		0	0	0	0	0	0
798	2020-12-08	1870.8	1870.8	1870.8	1870.8	1870.8	1870.8	1870.8		0	0	0	0	0	0	0	0	0	0	0	0		0	0	0	0	0	0		0	0	0	0	0	0		0	0	0	0	0	0
799	2020-12-07	1861.8	1861.8	1861.8	1861.8	1861.8	1861.8	1861.8		0	0	0	0	0	0	0	0	0	0	0	0		0	0	0	0	0	0		0	0	0	0	0	0		0	0	0	0	0	0
800	2020-12-04	1835.9	1835.9	1835.9	1835.9	1835.9	1835.9	1835.9		0	0	0	0	0	0	0	0	0	0	0	0		0	0	0	0	0	0		0	0	0	0	0	0		0	0	0	0	0	0
801	2020-12-03	1836.8	1836.8	1836.8	1836.8	1836.8	1836.8	1836.8		0	0	0	0	0	0	0	0	0	0	0	0		0	0	0	0	0	0		0	0	0	0	0	0		0	0	0	0	0	0
802	2020-12-02	1825.7	1825.7	1825.7	1825.7	1825.7	1825.7	1825.7		0	0	0	0	0	0	0	0	0	0	0	0		0	0	0	0	0	0		0	0	0	0	0	0		0	0	0	0	0	0
803	2020-12-01	1814.1	1814.1	1814.1	1814.1	1814.1	1814.1	1814.1		0	0	0	0	0	0	0	0	0	0	0	0		0	0	0	0	0	0		0	0	0	0	0	0		0	0	0	0	0	0
804	2020-11-30	1775.7	1775.7	1775.7	1775.7	1775.7	1775.7	1775.7		0	0	0	0	0	0	0	0	0	0	0	0		0	0	0	0	0	0		0	0	0	0	0	0		0	0	0	0	0	0
805	2020-11-27	1781.9	1781.9	1781.9	1781.9	1781.9	1781.9	1781.9		0	0	0	0	0	0	0	0	0	0	0	0		0	0	0	0	0	0		0	0	0	0	0	0		0	0	0	0	0	0
806	2020-11-25	1805.7	1805.7	1805.7	1805.7	1805.7	1805.7	1805.7		0	0	0	0	0	0	0	0	0	0	0	0		0	0	0	0	0	0		0	0	0	0	0	0		0	0	0	0	0	0
807	2020-11-24	1804.8	1804.8	1804.8	1804.8	1804.8	1804.8	1804.8		0	0	0	0	0	0	0	0	0	0	0	0		0	0	0	0	0	0		0	0	0	0	0	0		0	0	0	0	0	0
808	2020-11-23	1837.8	1837.8	1837.8	1837.8	1837.8	1837.8	1837.8		0	0	0	0	0	0	0	0	0	0	0	0		0	0	0	0	0	0		0	0	0	0	0	0		0	0	0	0	0	0
809	2020-11-20	1872.6	1872.6	1872.6	1872.6	1872.6	1872.6	1872.6		0	0	0	0	0	0	0	0	0	0	0	0		0	0	0	0	0	0		0	0	0	0	0	0		0	0	0	0	0	0
810	2020-11-19	1861.1	1861.1	1861.1	1861.1	1861.1	1861.1	1861.1		0	0	0	0	0	0	0	0	0	0	0	0		0	0	0	0	0	0		0	0	0	0	0	0		0	0	0	0	0	0
811	2020-11-18	1873.5	1109.887	1875.491	1874.633	1874.529	1872.8	1202.167		-763.613	763.613	1.991	1.991	1.133	1.133	1.029	1.029	-0.7	0.7	-671.333	671.333		583105	3.96408	1.28369	1.05884	0.49	450688		0.407586	-0.00106272	-0.00060475	-0.000549239	0.000373632	0.358331		0.407586	0.00106272	0.00060475	0.000549239	0.000373632	0.358331
812	2020-11-17	1884.5	1884.5	1884.5	1884.5	1884.5	1884.5	1884.5		0	0	0	0	0	0	0	0	0	0	0	0		0	0	0	0	0	0		0	0	0	0	0	0		0	0	0	0	0	0
813	2020-11-16	1887.3	1887.3	1887.3	1887.3	1887.3	1887.3	1887.3		0	0	0	0	0	0	0	0	0	0	0	0		0	0	0	0	0	0		0	0	0	0	0	0		0	0	0	0	0	0
814	2020-11-13	1885.7	1885.7	1885.7	1885.7	1885.7	1885.7	1885.7		0	0	0	0	0	0	0	0	0	0	0	0		0	0	0	0	0	0		0	0	0	0	0	0		0	0	0	0	0	0
815	2020-11-12	1872.6	1872.6	1872.6	1872.6	1872.6	1872.6	1872.6		0	0	0	0	0	0	0	0	0	0	0	0		0	0	0	0	0	0		0	0	0	0	0	0		0	0	0	0	0	0
816	2020-11-11	1860.7	1109.887	1862.130	1861.967	1861.789	1874.0	1201.965		-750.813	750.813	1.43	1.43	1.267	1.267	1.089	1.089	13.3	13.3	-658.735	658.735		563720	2.0449	1.60529	1.18592	176.89	433932		0.403511	-0.000768528	-0.000680927	-0.000585264	-0.00714785	0.354025		0.403511	0.000768528	0.000680927	0.000585264	0.00714785	0.354025
817	2020-11-10	1875.4	1875.4	1875.4	1875.4	1875.4	1875.4	1875.4		0	0	0	0	0	0	0	0	0	0	0	0		0	0	0	0	0	0		0	0	0	0	0	0		0	0	0	0	0	0
818	2020-11-09	1853.2	1853.2	1853.2	1853.2	1853.2	1853.2	1853.2		0	0	0	0	0	0	0	0	0	0	0	0		0	0	0	0	0	0		0	0	0	0	0	0		0	0	0	0	0	0
819	2020-11-06	1950.3	1950.3	1950.3	1950.3	1950.3	1950.3	1950.3		0	0	0	0	0	0	0	0	0	0	0	0		0	0	0	0	0	0		0	0	0	0	0	0		0	0	0	0	0	0
820	2020-11-05	1945.3	1945.3	1945.3	1945.3	1945.3	1945.3	1945.3		0	0	0	0	0	0	0	0	0	0	0	0		0	0	0	0	0	0		0	0	0	0	0	0		0	0	0	0	0	0
821	2020-11-04	1894.6	1894.6	1894.6	1894.6	1894.6	1894.6	1894.6		0	0	0	0	0	0	0	0	0	0	0	0		0	0	0	0	0	0		0	0	0	0	0	0		0	0	0	0	0	0
822	2020-11-03	1908.5	1908.5	1908.5	1908.5	1908.5	1908.5	1908.5		0	0	0	0	0	0	0	0	0	0	0	0		0	0	0	0	0	0		0	0	0	0	0	0		0	0	0	0	0	0
823	2020-11-02	1890.4	1109.887	1886.269	1887.567	1888.101	1900.725	1202.697		-780.513	780.513	-4.131	4.131	-2.833	2.833	-2.299	2.299	10.325	10.325	-687.703	687.703		609201	17.0652	8.02589	5.2854	106.606	472935		0.412882	0.00218525	0.00149862	0.00121614	-0.00546181	0.363787		0.412882	0.00218525	0.00149862	0.00121614	0.00546181	0.363787
824	2020-10-30	1877.4	1877.4	1877.4	1877.4	1877.4	1877.4	1877.4		0	0	0	0	0	0	0	0	0	0	0	0		0	0	0	0	0	0		0	0	0	0	0	0		0	0	0	0	0	0
825	2020-10-28	1865.6	1865.6	1865.6	1865.6	1865.6	1865.6	1865.6		0	0	0	0	0	0	0	0	0	0	0	0		0	0	0	0	0	0		0	0	0	0	0	0		0	0	0	0	0	0
826	2020-10-27	1876.2	1876.2	1876.2	1876.2	1876.2	1876.2	1876.2		0	0	0	0	0	0	0	0	0	0	0	0		0	0	0	0	0	0		0	0	0	0	0	0		0	0	0	0	0	0
827	2020-10-26	1908.8	1908.8	1908.8	1908.8	1908.8	1908.8	1908.8		0	0	0	0	0	0	0	0	0	0	0	0		0	0	0	0	0	0		0	0	0	0	0	0		0	0	0	0	0	0
828	2020-10-25	1902.7	1902.7	1902.7	1902.7	1902.7	1902.7	1902.7		0	0	0	0	0	0	0	0	0	0	0	0		0	0	0	0	0	0		0	0	0	0	0	0		0	0	0	0	0	0
829	2020-10-22	1902	1902.0	1902.0	1902.0	1902.0	1902.0	1902.0		0	0	0	0	0	0	0	0	0	0	0	0		0	0	0	0	0	0		0	0	0	0	0	0		0	0	0	0	0	0
830	2020-10-21	1901.1	1901.1	1901.1	1901.1	1901.1	1901.1	1901.1		0	0	0	0	0	0	0	0	0	0	0	0		0	0	0	0	0	0		0	0	0	0	0	0		0	0	0	0	0	0
831	2020-10-20	1924.6	1924.6	1924.6	1924.6	1924.6	1924.6	1924.6		0	0	0	0	0	0	0	0	0	0	0	0		0	0	0	0	0	0		0	0	0	0	0	0		0	0	0	0	0	0
832	2020-10-19	1910.4	1910.4	1910.4	1910.4	1910.4	1910.4	1910.4		0	0	0	0	0	0	0	0	0	0	0	0		0	0	0	0	0	0		0	0	0	0	0	0		0	0	0	0	0	0
833	2020-10-18	1906.4	1906.4	1906.4	1906.4	1906.4	1906.4	1906.4		0	0	0	0	0	0	0	0	0	0	0	0		0	0	0	0	0	0		0	0	0	0	0	0		0	0	0	0	0	0
834	2020-10-15	1900.8	1900.8	1900.8	1900.8	1900.8	1900.8	1900.8		0	0	0	0	0	0	0	0	0	0	0	0		0	0	0	0	0	0		0	0	0	0	0	0		0	0	0	0	0	0
835	2020-10-14	1903.2	1903.2	1903.2	1903.2	1903.2	1903.2	1903.2		0	0	0	0	0	0	0	0	0	0	0	0		0	0	0	0	0	0		0	0	0	0	0	0		0	0	0	0	0	0
836	2020-10-13	1901.3	1901.3	1901.3	1901.3	1901.3	1901.3	1901.3		0	0	0	0	0	0	0	0	0	0	0	0		0	0	0	0	0	0		0	0	0	0	0	0		0	0	0	0	0	0
837	2020-10-12	1888.5	1888.5	1888.5	1888.5	1888.5	1888.5	1888.5		0	0	0	0	0	0	0	0	0	0	0	0		0	0	0	0	0	0		0	0	0	0	0	0		0	0	0	0	0	0
838	2020-10-11	1922.5	1922.5	1922.5	1922.5	1922.5	1922.5	1922.5		0	0	0	0	0	0	0	0	0	0	0	0		0	0	0	0	0	0		0	0	0	0	0	0		0	0	0	0	0	0
839	2020-10-08	1919.5	1919.5	1919.5	1919.5	1919.5	1919.5	1919.5		0	0	0	0	0	0	0	0	0	0	0	0		0	0	0	0	0	0		0	0	0	0	0	0		0	0	0	0	0	0
840	2020-10-07	1888.6	1888.6	1888.6	1888.6	1888.6	1888.6	1888.6		0	0	0	0	0	0	0	0	0	0	0	0		0	0	0	0	0	0		0	0	0	0	0	0		0	0	0	0	0	0
841	2020-10-06	1883.6	1883.6	1883.6	1883.6	1883.6	1883.6	1883.6		0	0	0	0	0	0	0	0	0	0	0	0		0	0	0	0	0	0		0	0	0	0	0	0		0	0	0	0	0	0
842	2020-10-05	1901.1	1901.1	1901.1	1901.1	1901.1	1901.1	1901.1		0	0	0	0	0	0	0	0	0	0	0	0		0	0	0	0	0	0		0	0	0	0	0	0		0	0	0	0	0	0
843	2020-10-04	1912.5	1912.5	1912.5	1912.5	1912.5	1912.5	1912.5		0	0	0	0	0	0	0	0	0	0	0	0		0	0	0	0	0	0		0	0	0	0	0	0		0	0	0	0	0	0
844	2020-10-01	1900.2	1900.2	1900.2	1900.2	1900.2	1900.2	1900.2		0	0	0	0	0	0	0	0	0	0	0	0		0	0	0	0	0	0		0	0	0	0	0	0		0	0	0	0	0	0
845	2020-09-30	1908.4	1908.4	1908.4	1908.4	1908.4	1908.4	1908.4		0	0	0	0	0	0	0	0	0	0	0	0		0	0	0	0	0	0		0	0	0	0	0	0		0	0	0	0	0	0
846	2020-09-29	1887.5	1887.5	1887.5	1887.5	1887.5	1887.5	1887.5		0	0	0	0	0	0	0	0	0	0	0	0		0	0	0	0	0	0		0	0	0	0	0	0		0	0	0	0	0	0
847	2020-09-28	1894.3	1894.3	1894.3	1894.3	1894.3	1894.3	1894.3		0	0	0	0	0	0	0	0	0	0	0	0		0	0	0	0	0	0		0	0	0	0	0	0		0	0	0	0	0	0
848	2020-09-27	1872.8	1109.887	1875.491	1875.167	1874.529	1885.150	1202.111		-762.913	762.913	2.691	2.691	2.367	2.367	1.729	1.729	12.35	12.35	-670.689	670.689		582036	7.24148	5.60269	2.98944	152.523	449824		0.407365	-0.00143689	-0.00126388	-0.000923217	-0.0065944	0.358121		0.407365	0.00143689	0.00126388	0.000923217	0.0065944	0.358121
849	2020-09-24	1857.7	1857.7	1857.7	1857.7	1857.7	1857.7	1857.7		0	0	0	0	0	0	0	0	0	0	0	0		0	0	0	0	0	0		0	0	0	0	0	0		0	0	0	0	0	0
850	2020-09-23	1868.3	1868.3	1868.3	1868.3	1868.3	1868.3	1868.3		0	0	0	0	0	0	0	0	0	0	0	0		0	0	0	0	0	0		0	0	0	0	0	0		0	0	0	0	0	0
851	2020-09-22	1859.9	1859.9	1859.9	1859.9	1859.9	1859.9	1859.9		0	0	0	0	0	0	0	0	0	0	0	0		0	0	0	0	0	0		0	0	0	0	0	0		0	0	0	0	0	0
852	2020-09-21	1898.6	1109.887	1906.650	1907.9	1906.949	1880.550	1204.676		-788.713	788.713	8.05	8.05	9.3	9.3	8.349	8.349	-18.05	18.05	-693.924	693.924		622068	64.8025	86.49	69.7058	325.802	481531		0.415418	-0.00423997	-0.00489835	-0.00439745	0.00950701	0.365492		0.415418	0.00423997	0.00489835	0.00439745	0.00950701	0.365492
853	2020-09-20	1901.2	1901.2	1901.2	1901.2	1901.2	1901.2	1901.2		0	0	0	0	0	0	0	0	0	0	0	0		0	0	0	0	0	0		0	0	0	0	0	0		0	0	0	0	0	0
854	2020-09-17	1952.1	1952.1	1952.1	1952.1	1952.1	1952.1	1952.1		0	0	0	0	0	0	0	0	0	0	0	0		0	0	0	0	0	0		0	0	0	0	0	0		0	0	0	0	0	0
855	2020-09-16	1940	1940.0	1940.0	1940.0	1940.0	1940.0	1940.0		0	0	0	0	0	0	0	0	0	0	0	0		0	0	0	0	0	0		0	0	0	0	0	0		0	0	0	0	0	0
856	2020-09-15	1960.2	1960.2	1960.2	1960.2	1960.2	1960.2	1960.2		0	0	0	0	0	0	0	0	0	0	0	0		0	0	0	0	0	0		0	0	0	0	0	0		0	0	0	0	0	0
857	2020-09-14	1956.3	1956.3	1956.3	1956.3	1956.3	1956.3	1956.3		0	0	0	0	0	0	0	0	0	0	0	0		0	0	0	0	0	0		0	0	0	0	0	0		0	0	0	0	0	0
858	2020-09-13	1953.1	1953.1	1953.1	1953.1	1953.1	1953.1	1953.1		0	0	0	0	0	0	0	0	0	0	0	0		0	0	0	0	0	0		0	0	0	0	0	0		0	0	0	0	0	0
859	2020-09-10	1937.8	1937.8	1937.8	1937.8	1937.8	1937.8	1937.8		0	0	0	0	0	0	0	0	0	0	0	0		0	0	0	0	0	0		0	0	0	0	0	0		0	0	0	0	0	0
860	2020-09-09	1954.2	1954.2	1954.2	1954.2	1954.2	1954.2	1954.2		0	0	0	0	0	0	0	0	0	0	0	0		0	0	0	0	0	0		0	0	0	0	0	0		0	0	0	0	0	0
861	2020-09-08	1944.7	1944.7	1944.7	1944.7	1944.7	1944.7	1944.7		0	0	0	0	0	0	0	0	0	0	0	0		0	0	0	0	0	0		0	0	0	0	0	0		0	0	0	0	0	0
862	2020-09-07	1933	1109.887	1929.191	1919.133	1925.333	1940.540	1205.589		-823.113	823.113	-3.809	3.809	-13.867	13.867	-7.667	7.667	7.54	7.54	-727.411	727.411		677515	14.5085	192.294	58.7829	56.8516	529127		0.425822	0.00197051	0.00717382	0.00396637	-0.00390067	0.376312		0.425822	0.00197051	0.00717382	0.00396637	0.00390067	0.376312
863	2020-09-03	1923.9	1923.9	1923.9	1923.9	1923.9	1923.9	1923.9		0	0	0	0	0	0	0	0	0	0	0	0		0	0	0	0	0	0		0	0	0	0	0	0		0	0	0	0	0	0
864	2020-09-02	1927.6	1927.6	1927.6	1927.6	1927.6	1927.6	1927.6		0	0	0	0	0	0	0	0	0	0	0	0		0	0	0	0	0	0		0	0	0	0	0	0		0	0	0	0	0	0
865	2020-09-01	1934.4	1934.4	1934.4	1934.4	1934.4	1934.4	1934.4		0	0	0	0	0	0	0	0	0	0	0	0		0	0	0	0	0	0		0	0	0	0	0	0		0	0	0	0	0	0
866	2020-08-31	1968.2	1109.887	1973.960	1980.967	1982.271	1951.0	1207.572		-858.313	858.313	5.76	5.76	12.767	12.767	14.071	14.071	-17.2	17.2	-760.628	760.628		736701	33.1776	162.996	197.993	295.84	578555		0.43609	-0.00292653	-0.00648664	-0.00714917	0.00873895	0.386459		0.43609	0.00292653	0.00648664	0.00714917	0.00873895	0.386459
867	2020-08-30	1967.6	1967.6	1967.6	1967.6	1967.6	1967.6	1967.6		0	0	0	0	0	0	0	0	0	0	0	0		0	0	0	0	0	0		0	0	0	0	0	0		0	0	0	0	0	0
868	2020-08-27	1964.6	1109.887	1955.642	1949.867	1951.585	1933.1	1206.378		-854.713	854.713	-8.958	8.958	-14.733	14.733	-13.015	13.015	-31.5	31.5	-758.222	758.222		730534	80.2458	217.061	169.39	992.25	574901		0.435057	0.00455971	0.00749924	0.00662476	0.0160338	0.385942		0.435057	0.00455971	0.00749924	0.00662476	0.0160338	0.385942
869	2020-08-26	1921.6	1921.6	1921.6	1921.6	1921.6	1921.6	1921.6		0	0	0	0	0	0	0	0	0	0	0	0		0	0	0	0	0	0		0	0	0	0	0	0		0	0	0	0	0	0
870	2020-08-25	1940.7	1940.7	1940.7	1940.7	1940.7	1940.7	1940.7		0	0	0	0	0	0	0	0	0	0	0	0		0	0	0	0	0	0		0	0	0	0	0	0		0	0	0	0	0	0
871	2020-08-24	1911.8	1109.887	1915.981	1918.833	1914.480	1934.2	1205.532		-801.913	801.913	4.181	4.181	7.033	7.033	2.68	2.68	22.4	22.4	-706.268	706.268		643064	17.4808	49.4631	7.1824	501.76	498814		0.419454	-0.00218694	-0.00367873	-0.00140182	-0.0117167	0.369426		0.419454	0.00218694	0.00367873	0.00140182	0.0117167	0.369426
872	2020-08-23	1927.7	1927.7	1927.7	1927.7	1927.7	1927.7	1927.7		0	0	0	0	0	0	0	0	0	0	0	0		0	0	0	0	0	0		0	0	0	0	0	0		0	0	0	0	0	0
873	2020-08-20	1934.6	1109.887	1933.427	1922.833	1935.141	1932.275	1205.989		-824.713	824.713	-1.173	1.173	-11.767	11.767	0.541	0.541	-2.325	2.325	-728.611	728.611		680152	1.37593	138.462	0.292681	5.40562	530874		0.426296	0.000606327	0.00608239	-0.000279644	0.0012018	0.376621		0.426296	0.000606327	0.00608239	0.000279644	0.0012018	0.376621
874	2020-08-19	1933.8	1933.8	1933.8	1933.8	1933.8	1933.8	1933.8		0	0	0	0	0	0	0	0	0	0	0	0		0	0	0	0	0	0		0	0	0	0	0	0		0	0	0	0	0	0
875	2020-08-18	1958.7	1958.7	1958.7	1958.7	1958.7	1958.7	1958.7		0	0	0	0	0	0	0	0	0	0	0	0		0	0	0	0	0	0		0	0	0	0	0	0		0	0	0	0	0	0
876	2020-08-17	1999.4	1999.4	1999.4	1999.4	1999.4	1999.4	1999.4		0	0	0	0	0	0	0	0	0	0	0	0		0	0	0	0	0	0		0	0	0	0	0	0		0	0	0	0	0	0
877	2020-08-16	1985	1985.0	1985.0	1985.0	1985.0	1985.0	1985.0		0	0	0	0	0	0	0	0	0	0	0	0		0	0	0	0	0	0		0	0	0	0	0	0		0	0	0	0	0	0
878	2020-08-13	1937	1937.0	1937.0	1937.0	1937.0	1937.0	1937.0		0	0	0	0	0	0	0	0	0	0	0	0		0	0	0	0	0	0		0	0	0	0	0	0		0	0	0	0	0	0
879	2020-08-12	1956.7	1956.7	1956.7	1956.7	1956.7	1956.7	1956.7		0	0	0	0	0	0	0	0	0	0	0	0		0	0	0	0	0	0		0	0	0	0	0	0		0	0	0	0	0	0
880	2020-08-11	1934.9	1934.9	1934.9	1934.9	1934.9	1934.9	1934.9		0	0	0	0	0	0	0	0	0	0	0	0		0	0	0	0	0	0		0	0	0	0	0	0		0	0	0	0	0	0
881	2020-08-10	1932.6	1932.6	1932.6	1932.6	1932.6	1932.6	1932.6		0	0	0	0	0	0	0	0	0	0	0	0		0	0	0	0	0	0		0	0	0	0	0	0		0	0	0	0	0	0
882	2020-08-09	2024.4	2024.4	2024.4	2024.4	2024.4	2024.4	2024.4		0	0	0	0	0	0	0	0	0	0	0	0		0	0	0	0	0	0		0	0	0	0	0	0		0	0	0	0	0	0
883	2020-08-06	2010.1	2010.1	2010.1	2010.1	2010.1	2010.1	2010.1		0	0	0	0	0	0	0	0	0	0	0	0		0	0	0	0	0	0		0	0	0	0	0	0		0	0	0	0	0	0
884	2020-08-05	2051.5	2051.5	2051.5	2051.5	2051.5	2051.5	2051.5		0	0	0	0	0	0	0	0	0	0	0	0		0	0	0	0	0	0		0	0	0	0	0	0		0	0	0	0	0	0
885	2020-08-04	2031.1	2031.1	2031.1	2031.1	2031.1	2031.1	2031.1		0	0	0	0	0	0	0	0	0	0	0	0		0	0	0	0	0	0		0	0	0	0	0	0		0	0	0	0	0	0
886	2020-08-03	2001.2	2001.2	2001.2	2001.2	2001.2	2001.2	2001.2		0	0	0	0	0	0	0	0	0	0	0	0		0	0	0	0	0	0		0	0	0	0	0	0		0	0	0	0	0	0
887	2020-08-02	1966	1966.0	1966.0	1966.0	1966.0	1966.0	1966.0		0	0	0	0	0	0	0	0	0	0	0	0		0	0	0	0	0	0		0	0	0	0	0	0		0	0	0	0	0	0
888	2020-07-30	1962.8	1962.8	1962.8	1962.8	1962.8	1962.8	1962.8		0	0	0	0	0	0	0	0	0	0	0	0		0	0	0	0	0	0		0	0	0	0	0	0		0	0	0	0	0	0
889	2020-07-29	1942.3	1942.3	1942.3	1942.3	1942.3	1942.3	1942.3		0	0	0	0	0	0	0	0	0	0	0	0		0	0	0	0	0	0		0	0	0	0	0	0		0	0	0	0	0	0
890	2020-07-28	1953.5	1953.5	1953.5	1953.5	1953.5	1953.5	1953.5		0	0	0	0	0	0	0	0	0	0	0	0		0	0	0	0	0	0		0	0	0	0	0	0		0	0	0	0	0	0
891	2020-07-27	1944.7	1944.7	1944.7	1944.7	1944.7	1944.7	1944.7		0	0	0	0	0	0	0	0	0	0	0	0		0	0	0	0	0	0		0	0	0	0	0	0		0	0	0	0	0	0
892	2020-07-26	1931	1931.0	1931.0	1931.0	1931.0	1931.0	1931.0		0	0	0	0	0	0	0	0	0	0	0	0		0	0	0	0	0	0		0	0	0	0	0	0		0	0	0	0	0	0
893	2020-07-23	1897.3	1897.3	1897.3	1897.3	1897.3	1897.3	1897.3		0	0	0	0	0	0	0	0	0	0	0	0		0	0	0	0	0	0		0	0	0	0	0	0		0	0	0	0	0	0
894	2020-07-22	1889.1	1889.1	1889.1	1889.1	1889.1	1889.1	1889.1		0	0	0	0	0	0	0	0	0	0	0	0		0	0	0	0	0	0		0	0	0	0	0	0		0	0	0	0	0	0
895	2020-07-21	1864.1	1864.1	1864.1	1864.1	1864.1	1864.1	1864.1		0	0	0	0	0	0	0	0	0	0	0	0		0	0	0	0	0	0		0	0	0	0	0	0		0	0	0	0	0	0
896	2020-07-20	1842.4	1842.4	1842.4	1842.4	1842.4	1842.4	1842.4		0	0	0	0	0	0	0	0	0	0	0	0		0	0	0	0	0	0		0	0	0	0	0	0		0	0	0	0	0	0
897	2020-07-19	1815.9	1815.9	1815.9	1815.9	1815.9	1815.9	1815.9		0	0	0	0	0	0	0	0	0	0	0	0		0	0	0	0	0	0		0	0	0	0	0	0		0	0	0	0	0	0
898	2020-07-16	1808.3	1109.887	1811.272	1803.667	1805.769	1803.0	1195.410		-698.413	698.413	2.972	2.972	-4.633	4.633	-2.531	2.531	-5.3	5.3	-612.89	612.89		487781	8.83278	21.4647	6.40596	28.09	375634		0.386226	-0.00164353	0.00256207	0.00139966	0.00293093	0.338932		0.386226	0.00164353	0.00256207	0.00139966	0.00293093	0.338932
899	2020-07-15	1798.7	1798.7	1798.7	1798.7	1798.7	1798.7	1798.7		0	0	0	0	0	0	0	0	0	0	0	0		0	0	0	0	0	0		0	0	0	0	0	0		0	0	0	0	0	0
900	2020-07-14	1811.4	1811.4	1811.4	1811.4	1811.4	1811.4	1811.4		0	0	0	0	0	0	0	0	0	0	0	0		0	0	0	0	0	0		0	0	0	0	0	0		0	0	0	0	0	0
901	2020-07-13	1810.6	1810.6	1810.6	1810.6	1810.6	1810.6	1810.6		0	0	0	0	0	0	0	0	0	0	0	0		0	0	0	0	0	0		0	0	0	0	0	0		0	0	0	0	0	0
902	2020-07-12	1811	1811.0	1811.0	1811.0	1811.0	1811.0	1811.0		0	0	0	0	0	0	0	0	0	0	0	0		0	0	0	0	0	0		0	0	0	0	0	0		0	0	0	0	0	0
903	2020-07-09	1798.2	1798.2	1798.2	1798.2	1798.2	1798.2	1798.2		0	0	0	0	0	0	0	0	0	0	0	0		0	0	0	0	0	0		0	0	0	0	0	0		0	0	0	0	0	0
904	2020-07-08	1799.2	1109.887	1792.438	1816.333	1806.060	1806.850	1196.403		-689.313	689.313	-6.762	6.762	17.133	17.133	6.86	6.86	7.65	7.65	-602.797	602.797		475152	45.7246	293.54	47.0596	58.5225	363364		0.383122	0.00375834	-0.00952257	-0.00381281	-0.00425189	0.335036		0.383122	0.00375834	0.00952257	0.00381281	0.00425189	0.335036
905	2020-07-07	1815.5	1815.5	1815.5	1815.5	1815.5	1815.5	1815.5		0	0	0	0	0	0	0	0	0	0	0	0		0	0	0	0	0	0		0	0	0	0	0	0		0	0	0	0	0	0
906	2020-07-06	1804.2	1804.2	1804.2	1804.2	1804.2	1804.2	1804.2		0	0	0	0	0	0	0	0	0	0	0	0		0	0	0	0	0	0		0	0	0	0	0	0		0	0	0	0	0	0
907	2020-07-05	1788.5	1788.5	1788.5	1788.5	1788.5	1788.5	1788.5		0	0	0	0	0	0	0	0	0	0	0	0		0	0	0	0	0	0		0	0	0	0	0	0		0	0	0	0	0	0
908	2020-07-01	1784	1784.0	1784.0	1784.0	1784.0	1784.0	1784.0		0	0	0	0	0	0	0	0	0	0	0	0		0	0	0	0	0	0		0	0	0	0	0	0		0	0	0	0	0	0
909	2020-06-30	1773.2	1773.2	1773.2	1773.2	1773.2	1773.2	1773.2		0	0	0	0	0	0	0	0	0	0	0	0		0	0	0	0	0	0		0	0	0	0	0	0		0	0	0	0	0	0
910	2020-06-29	1793	1793.0	1793.0	1793.0	1793.0	1793.0	1793.0		0	0	0	0	0	0	0	0	0	0	0	0		0	0	0	0	0	0		0	0	0	0	0	0		0	0	0	0	0	0
911	2020-06-28	1774.8	1774.8	1774.8	1774.8	1774.8	1774.8	1774.8		0	0	0	0	0	0	0	0	0	0	0	0		0	0	0	0	0	0		0	0	0	0	0	0		0	0	0	0	0	0
912	2020-06-25	1772.5	1772.5	1772.5	1772.5	1772.5	1772.5	1772.5		0	0	0	0	0	0	0	0	0	0	0	0		0	0	0	0	0	0		0	0	0	0	0	0		0	0	0	0	0	0
913	2020-06-24	1762.1	1762.1	1762.1	1762.1	1762.1	1762.1	1762.1		0	0	0	0	0	0	0	0	0	0	0	0		0	0	0	0	0	0		0	0	0	0	0	0		0	0	0	0	0	0
914	2020-06-23	1765.8	1765.8	1765.8	1765.8	1765.8	1765.8	1765.8		0	0	0	0	0	0	0	0	0	0	0	0		0	0	0	0	0	0		0	0	0	0	0	0		0	0	0	0	0	0
915	2020-06-22	1772.1	1772.1	1772.1	1772.1	1772.1	1772.1	1772.1		0	0	0	0	0	0	0	0	0	0	0	0		0	0	0	0	0	0		0	0	0	0	0	0		0	0	0	0	0	0
916	2020-06-21	1756.7	1109.887	1758.742	1759.733	1761.136	1765.550	1190.273		-646.813	646.813	2.042	2.042	3.033	3.033	4.436	4.436	8.85	8.85	-566.427	566.427		418367	4.16976	9.19909	19.6781	78.3225	320840		0.368198	-0.00116241	-0.00172653	-0.00252519	-0.00503786	0.322438		0.368198	0.00116241	0.00172653	0.00252519	0.00503786	0.322438
917	2020-06-18	1745.9	1745.9	1745.9	1745.9	1745.9	1745.9	1745.9		0	0	0	0	0	0	0	0	0	0	0	0		0	0	0	0	0	0		0	0	0	0	0	0		0	0	0	0	0	0
918	2020-06-17	1724.8	1724.8	1724.8	1724.8	1724.8	1724.8	1724.8		0	0	0	0	0	0	0	0	0	0	0	0		0	0	0	0	0	0		0	0	0	0	0	0		0	0	0	0	0	0
919	2020-06-16	1729.2	1729.2	1729.2	1729.2	1729.2	1729.2	1729.2		0	0	0	0	0	0	0	0	0	0	0	0		0	0	0	0	0	0		0	0	0	0	0	0		0	0	0	0	0	0
920	2020-06-15	1729.6	1109.887	1727.422	1727.067	1724.980	1724.750	1186.326		-619.713	619.713	-2.178	2.178	-2.533	2.533	-4.62	4.62	-4.85	4.85	-543.274	543.274		384044	4.74368	6.41609	21.3444	23.5225	295147		0.358298	0.00125925	0.0014645	0.00267114	0.00280412	0.314104		0.358298	0.00125925	0.0014645	0.00267114	0.00280412	0.314104
921	2020-06-14	1720.3	1720.3	1720.3	1720.3	1720.3	1720.3	1720.3		0	0	0	0	0	0	0	0	0	0	0	0		0	0	0	0	0	0		0	0	0	0	0	0		0	0	0	0	0	0
922	2020-06-11	1729.3	1729.3	1729.3	1729.3	1729.3	1729.3	1729.3		0	0	0	0	0	0	0	0	0	0	0	0		0	0	0	0	0	0		0	0	0	0	0	0		0	0	0	0	0	0
923	2020-06-10	1732	1732.0	1732.0	1732.0	1732.0	1732.0	1732.0		0	0	0	0	0	0	0	0	0	0	0	0		0	0	0	0	0	0		0	0	0	0	0	0		0	0	0	0	0	0
924	2020-06-09	1713.3	1713.3	1713.3	1713.3	1713.3	1713.3	1713.3		0	0	0	0	0	0	0	0	0	0	0	0		0	0	0	0	0	0		0	0	0	0	0	0		0	0	0	0	0	0
925	2020-06-08	1714.7	1714.7	1714.7	1714.7	1714.7	1714.7	1714.7		0	0	0	0	0	0	0	0	0	0	0	0		0	0	0	0	0	0		0	0	0	0	0	0		0	0	0	0	0	0
926	2020-06-07	1698.3	1698.3	1698.3	1698.3	1698.3	1698.3	1698.3		0	0	0	0	0	0	0	0	0	0	0	0		0	0	0	0	0	0		0	0	0	0	0	0		0	0	0	0	0	0
927	2020-06-04	1676.2	1676.2	1676.2	1676.2	1676.2	1676.2	1676.2		0	0	0	0	0	0	0	0	0	0	0	0		0	0	0	0	0	0		0	0	0	0	0	0		0	0	0	0	0	0
928	2020-06-03	1718.9	1718.9	1718.9	1718.9	1718.9	1718.9	1718.9		0	0	0	0	0	0	0	0	0	0	0	0		0	0	0	0	0	0		0	0	0	0	0	0		0	0	0	0	0	0
929	2020-06-02	1697.8	1697.8	1697.8	1697.8	1697.8	1697.8	1697.8		0	0	0	0	0	0	0	0	0	0	0	0		0	0	0	0	0	0		0	0	0	0	0	0		0	0	0	0	0	0
930	2020-06-01	1725.2	1725.2	1725.2	1725.2	1725.2	1725.2	1725.2		0	0	0	0	0	0	0	0	0	0	0	0		0	0	0	0	0	0		0	0	0	0	0	0		0	0	0	0	0	0
931	2020-05-31	1737.8	1737.8	1737.8	1737.8	1737.8	1737.8	1737.8		0	0	0	0	0	0	0	0	0	0	0	0		0	0	0	0	0	0		0	0	0	0	0	0		0	0	0	0	0	0
932	2020-05-28	1736.9	1736.9	1736.9	1736.9	1736.9	1736.9	1736.9		0	0	0	0	0	0	0	0	0	0	0	0		0	0	0	0	0	0		0	0	0	0	0	0		0	0	0	0	0	0
933	2020-05-27	1713.3	1713.3	1713.3	1713.3	1713.3	1713.3	1713.3		0	0	0	0	0	0	0	0	0	0	0	0		0	0	0	0	0	0		0	0	0	0	0	0		0	0	0	0	0	0
934	2020-05-26	1710.3	1710.3	1710.3	1710.3	1710.3	1710.3	1710.3		0	0	0	0	0	0	0	0	0	0	0	0		0	0	0	0	0	0		0	0	0	0	0	0		0	0	0	0	0	0
935	2020-05-25	1704.8	1704.8	1704.8	1704.8	1704.8	1704.8	1704.8		0	0	0	0	0	0	0	0	0	0	0	0		0	0	0	0	0	0		0	0	0	0	0	0		0	0	0	0	0	0
936	2020-05-21	1734.6	1734.6	1734.6	1734.6	1734.6	1734.6	1734.6		0	0	0	0	0	0	0	0	0	0	0	0		0	0	0	0	0	0		0	0	0	0	0	0		0	0	0	0	0	0
937	2020-05-20	1720.5	1720.5	1720.5	1720.5	1720.5	1720.5	1720.5		0	0	0	0	0	0	0	0	0	0	0	0		0	0	0	0	0	0		0	0	0	0	0	0		0	0	0	0	0	0
938	2020-05-19	1750.6	1750.6	1750.6	1750.6	1750.6	1750.6	1750.6		0	0	0	0	0	0	0	0	0	0	0	0		0	0	0	0	0	0		0	0	0	0	0	0		0	0	0	0	0	0
939	2020-05-18	1744.2	1744.2	1744.2	1744.2	1744.2	1744.2	1744.2		0	0	0	0	0	0	0	0	0	0	0	0		0	0	0	0	0	0		0	0	0	0	0	0		0	0	0	0	0	0
940	2020-05-17	1731.8	1731.8	1731.8	1731.8	1731.8	1731.8	1731.8		0	0	0	0	0	0	0	0	0	0	0	0		0	0	0	0	0	0		0	0	0	0	0	0		0	0	0	0	0	0
941	2020-05-14	1753.4	1753.4	1753.4	1753.4	1753.4	1753.4	1753.4		0	0	0	0	0	0	0	0	0	0	0	0		0	0	0	0	0	0		0	0	0	0	0	0		0	0	0	0	0	0
942	2020-05-13	1738.1	1738.1	1738.1	1738.1	1738.1	1738.1	1738.1		0	0	0	0	0	0	0	0	0	0	0	0		0	0	0	0	0	0		0	0	0	0	0	0		0	0	0	0	0	0
943	2020-05-12	1713.9	1713.9	1713.9	1713.9	1713.9	1713.9	1713.9		0	0	0	0	0	0	0	0	0	0	0	0		0	0	0	0	0	0		0	0	0	0	0	0		0	0	0	0	0	0
944	2020-05-11	1704.4	1704.4	1704.4	1704.4	1704.4	1704.4	1704.4		0	0	0	0	0	0	0	0	0	0	0	0		0	0	0	0	0	0		0	0	0	0	0	0		0	0	0	0	0	0
945	2020-05-10	1695.3	1695.3	1695.3	1695.3	1695.3	1695.3	1695.3		0	0	0	0	0	0	0	0	0	0	0	0		0	0	0	0	0	0		0	0	0	0	0	0		0	0	0	0	0	0
946	2020-05-07	1709.9	1709.9	1709.9	1709.9	1709.9	1709.9	1709.9		0	0	0	0	0	0	0	0	0	0	0	0		0	0	0	0	0	0		0	0	0	0	0	0		0	0	0	0	0	0
947	2020-05-06	1721.8	1721.8	1721.8	1721.8	1721.8	1721.8	1721.8		0	0	0	0	0	0	0	0	0	0	0	0		0	0	0	0	0	0		0	0	0	0	0	0		0	0	0	0	0	0
948	2020-05-05	1684.2	1684.2	1684.2	1684.2	1684.2	1684.2	1684.2		0	0	0	0	0	0	0	0	0	0	0	0		0	0	0	0	0	0		0	0	0	0	0	0		0	0	0	0	0	0
949	2020-05-04	1704.4	1704.4	1704.4	1704.4	1704.4	1704.4	1704.4		0	0	0	0	0	0	0	0	0	0	0	0		0	0	0	0	0	0		0	0	0	0	0	0		0	0	0	0	0	0
950	2020-05-03	1706.9	1706.9	1706.9	1706.9	1706.9	1706.9	1706.9		0	0	0	0	0	0	0	0	0	0	0	0		0	0	0	0	0	0		0	0	0	0	0	0		0	0	0	0	0	0
951	2020-04-30	1694.5	1109.887	1672.411	1691.8	1679.230	1689.875	1181.102		-584.613	584.613	-22.089	22.089	-2.7	2.7	-15.27	15.27	-4.625	4.625	-513.398	513.398		341772	487.924	7.29	233.173	21.3906	263578		0.345006	0.0130357	0.00159339	0.00901151	0.00272942	0.302979		0.345006	0.0130357	0.00159339	0.00901151	0.00272942	0.302979
952	2020-04-29	1684.2	1684.2	1684.2	1684.2	1684.2	1684.2	1684.2		0	0	0	0	0	0	0	0	0	0	0	0		0	0	0	0	0	0		0	0	0	0	0	0		0	0	0	0	0	0
953	2020-04-28	1703.4	1703.4	1703.4	1703.4	1703.4	1703.4	1703.4		0	0	0	0	0	0	0	0	0	0	0	0		0	0	0	0	0	0		0	0	0	0	0	0		0	0	0	0	0	0
954	2020-04-27	1710.5	1109.887	1708.639	1710.267	1710.481	1707.650	1184.694		-600.613	600.613	-1.861	1.861	-0.233	0.233	-0.019	0.019	-2.85	2.85	-525.806	525.806		360736	3.46332	0.054289	0.000361	8.1225	276472		0.351133	0.00108799	0.000136217	1.11079e-05	0.00166618	0.307399		0.351133	0.00108799	0.000136217	1.11079e-05	0.00166618	0.307399
955	2020-04-26	1711.9	1711.9	1711.9	1711.9	1711.9	1711.9	1711.9		0	0	0	0	0	0	0	0	0	0	0	0		0	0	0	0	0	0		0	0	0	0	0	0		0	0	0	0	0	0
956	2020-04-23	1723.5	1109.887	1727.422	1720.4	1723.474	1721.980	1187.327		-613.613	613.613	3.922	3.922	-3.1	3.1	-0.026	0.026	-1.52	1.52	-536.173	536.173		376521	15.3821	9.61	0.000676	2.3104	287481		0.356027	-0.0022756	0.00179867	1.50856e-05	0.000881926	0.311095		0.356027	0.0022756	0.00179867	1.50856e-05	0.000881926	0.311095
957	2020-04-22	1733.3	1109.887	1737.069	1742.7	1744.297	1725.340	1187.766		-623.413	623.413	3.769	3.769	9.4	9.4	10.997	10.997	-7.96	7.96	-545.534	545.534		388644	14.2054	88.36	120.934	63.3616	297607		0.359668	-0.00217446	-0.00542318	-0.00634455	0.0045924	0.314737		0.359668	0.00217446	0.00542318	0.00634455	0.0045924	0.314737
958	2020-04-21	1728.7	1728.7	1728.7	1728.7	1728.7	1728.7	1728.7		0	0	0	0	0	0	0	0	0	0	0	0		0	0	0	0	0	0		0	0	0	0	0	0		0	0	0	0	0	0
959	2020-04-20	1678.2	1678.2	1678.2	1678.2	1678.2	1678.2	1678.2		0	0	0	0	0	0	0	0	0	0	0	0		0	0	0	0	0	0		0	0	0	0	0	0		0	0	0	0	0	0
960	2020-04-19	1701.6	1701.6	1701.6	1701.6	1701.6	1701.6	1701.6		0	0	0	0	0	0	0	0	0	0	0	0		0	0	0	0	0	0		0	0	0	0	0	0		0	0	0	0	0	0
961	2020-04-16	1689.2	1689.2	1689.2	1689.2	1689.2	1689.2	1689.2		0	0	0	0	0	0	0	0	0	0	0	0		0	0	0	0	0	0		0	0	0	0	0	0		0	0	0	0	0	0
962	2020-04-15	1720.4	1720.4	1720.4	1720.4	1720.4	1720.4	1720.4		0	0	0	0	0	0	0	0	0	0	0	0		0	0	0	0	0	0		0	0	0	0	0	0		0	0	0	0	0	0
963	2020-04-14	1727.2	1727.2	1727.2	1727.2	1727.2	1727.2	1727.2		0	0	0	0	0	0	0	0	0	0	0	0		0	0	0	0	0	0		0	0	0	0	0	0		0	0	0	0	0	0
964	2020-04-13	1756.7	1756.7	1756.7	1756.7	1756.7	1756.7	1756.7		0	0	0	0	0	0	0	0	0	0	0	0		0	0	0	0	0	0		0	0	0	0	0	0		0	0	0	0	0	0
965	2020-04-12	1744.8	1744.8	1744.8	1744.8	1744.8	1744.8	1744.8		0	0	0	0	0	0	0	0	0	0	0	0		0	0	0	0	0	0		0	0	0	0	0	0		0	0	0	0	0	0
966	2020-04-08	1736.2	1736.2	1736.2	1736.2	1736.2	1736.2	1736.2		0	0	0	0	0	0	0	0	0	0	0	0		0	0	0	0	0	0		0	0	0	0	0	0		0	0	0	0	0	0
967	2020-04-07	1665.4	1665.4	1665.4	1665.4	1665.4	1665.4	1665.4		0	0	0	0	0	0	0	0	0	0	0	0		0	0	0	0	0	0		0	0	0	0	0	0		0	0	0	0	0	0
968	2020-04-06	1664.8	1664.8	1664.8	1664.8	1664.8	1664.8	1664.8		0	0	0	0	0	0	0	0	0	0	0	0		0	0	0	0	0	0		0	0	0	0	0	0		0	0	0	0	0	0
969	2020-04-05	1677	1677.0	1677.0	1677.0	1677.0	1677.0	1677.0		0	0	0	0	0	0	0	0	0	0	0	0		0	0	0	0	0	0		0	0	0	0	0	0		0	0	0	0	0	0
970	2020-04-02	1633.7	1633.7	1633.7	1633.7	1633.7	1633.7	1633.7		0	0	0	0	0	0	0	0	0	0	0	0		0	0	0	0	0	0		0	0	0	0	0	0		0	0	0	0	0	0
971	2020-04-01	1625.7	1625.7	1625.7	1625.7	1625.7	1625.7	1625.7		0	0	0	0	0	0	0	0	0	0	0	0		0	0	0	0	0	0		0	0	0	0	0	0		0	0	0	0	0	0
972	2020-03-31	1578.2	1109.887	1592.138	1585.933	1587.444	1624.467	1166.832		-468.313	468.313	13.938	13.938	7.733	7.733	9.244	9.244	46.267	46.267	-411.368	411.368		219317	194.268	59.7993	85.4515	2140.64	169224		0.296739	-0.00883158	-0.00489989	-0.00585731	-0.0293163	0.260656		0.296739	0.00883158	0.00489989	0.00585731	0.0293163	0.260656
973	2020-03-30	1583.4	1109.887	1579.771	1596.567	1586.188	1623.233	1170.165		-473.513	473.513	-3.629	3.629	13.167	13.167	2.788	2.788	39.833	39.833	-413.235	413.235		224215	13.1696	173.37	7.77294	1586.67	170763		0.299048	0.0022919	-0.00831565	-0.00176077	-0.0251566	0.26098		0.299048	0.0022919	0.00831565	0.00176077	0.0251566	0.26098
974	2020-03-29	1622	1622.0	1622.0	1622.0	1622.0	1622.0	1622.0		0	0	0	0	0	0	0	0	0	0	0	0		0	0	0	0	0	0		0	0	0	0	0	0		0	0	0	0	0	0
975	2020-03-26	1623.9	1623.9	1623.9	1623.9	1623.9	1623.9	1623.9		0	0	0	0	0	0	0	0	0	0	0	0		0	0	0	0	0	0		0	0	0	0	0	0		0	0	0	0	0	0
976	2020-03-25	1650.1	1109.887	1657.375	1652.3	1655.466	1628.1	1177.204		-540.213	540.213	7.275	7.275	2.2	2.2	5.366	5.366	-22	22	-472.896	472.896		291830	52.9256	4.84	28.794	484	223631		0.327382	-0.00440882	-0.00133325	-0.00325192	0.0133325	0.286586		0.327382	0.00440882	0.00133325	0.00325192	0.0133325	0.286586
977	2020-03-24	1632.3	1632.3	1632.3	1632.3	1632.3	1632.3	1632.3		0	0	0	0	0	0	0	0	0	0	0	0		0	0	0	0	0	0		0	0	0	0	0	0		0	0	0	0	0	0
978	2020-03-23	1660.2	1660.2	1660.2	1660.2	1660.2	1660.2	1660.2		0	0	0	0	0	0	0	0	0	0	0	0		0	0	0	0	0	0		0	0	0	0	0	0		0	0	0	0	0	0
979	2020-03-22	1567	1567.0	1567.0	1567.0	1567.0	1567.0	1567.0		0	0	0	0	0	0	0	0	0	0	0	0		0	0	0	0	0	0		0	0	0	0	0	0		0	0	0	0	0	0
980	2020-03-19	1484	1484.0	1484.0	1484.0	1484.0	1484.0	1484.0		0	0	0	0	0	0	0	0	0	0	0	0		0	0	0	0	0	0		0	0	0	0	0	0		0	0	0	0	0	0
981	2020-03-18	1478.6	1478.6	1478.6	1478.6	1478.6	1478.6	1478.6		0	0	0	0	0	0	0	0	0	0	0	0		0	0	0	0	0	0		0	0	0	0	0	0		0	0	0	0	0	0
982	2020-03-17	1477.3	1477.3	1477.3	1477.3	1477.3	1477.3	1477.3		0	0	0	0	0	0	0	0	0	0	0	0		0	0	0	0	0	0		0	0	0	0	0	0		0	0	0	0	0	0
983	2020-03-16	1524.9	1524.9	1524.9	1524.9	1524.9	1524.9	1524.9		0	0	0	0	0	0	0	0	0	0	0	0		0	0	0	0	0	0		0	0	0	0	0	0		0	0	0	0	0	0
984	2020-03-15	1485.9	1485.9	1485.9	1485.9	1485.9	1485.9	1485.9		0	0	0	0	0	0	0	0	0	0	0	0		0	0	0	0	0	0		0	0	0	0	0	0		0	0	0	0	0	0
985	2020-03-12	1515.7	1515.7	1515.7	1515.7	1515.7	1515.7	1515.7		0	0	0	0	0	0	0	0	0	0	0	0		0	0	0	0	0	0		0	0	0	0	0	0		0	0	0	0	0	0
986	2020-03-11	1589.3	1589.3	1589.3	1589.3	1589.3	1589.3	1589.3		0	0	0	0	0	0	0	0	0	0	0	0		0	0	0	0	0	0		0	0	0	0	0	0		0	0	0	0	0	0
987	2020-03-10	1641.4	1641.4	1641.4	1641.4	1641.4	1641.4	1641.4		0	0	0	0	0	0	0	0	0	0	0	0		0	0	0	0	0	0		0	0	0	0	0	0		0	0	0	0	0	0
988	2020-03-09	1659.1	1659.1	1659.1	1659.1	1659.1	1659.1	1659.1		0	0	0	0	0	0	0	0	0	0	0	0		0	0	0	0	0	0		0	0	0	0	0	0		0	0	0	0	0	0
989	2020-03-08	1674.5	1674.5	1674.5	1674.5	1674.5	1674.5	1674.5		0	0	0	0	0	0	0	0	0	0	0	0		0	0	0	0	0	0		0	0	0	0	0	0		0	0	0	0	0	0
990	2020-03-06	1670.8	1670.8	1670.8	1670.8	1670.8	1670.8	1670.8		0	0	0	0	0	0	0	0	0	0	0	0		0	0	0	0	0	0		0	0	0	0	0	0		0	0	0	0	0	0
991	2020-03-05	1666.4	1666.4	1666.4	1666.4	1666.4	1666.4	1666.4		0	0	0	0	0	0	0	0	0	0	0	0		0	0	0	0	0	0		0	0	0	0	0	0		0	0	0	0	0	0
992	2020-03-04	1641.1	1641.1	1641.1	1641.1	1641.1	1641.1	1641.1		0	0	0	0	0	0	0	0	0	0	0	0		0	0	0	0	0	0		0	0	0	0	0	0		0	0	0	0	0	0
993	2020-03-03	1642.1	1642.1	1642.1	1642.1	1642.1	1642.1	1642.1		0	0	0	0	0	0	0	0	0	0	0	0		0	0	0	0	0	0		0	0	0	0	0	0		0	0	0	0	0	0
994	2020-03-02	1592.3	1592.3	1592.3	1592.3	1592.3	1592.3	1592.3		0	0	0	0	0	0	0	0	0	0	0	0		0	0	0	0	0	0		0	0	0	0	0	0		0	0	0	0	0	0
995	2020-02-28	1564.1	1564.1	1564.1	1564.1	1564.1	1564.1	1564.1		0	0	0	0	0	0	0	0	0	0	0	0		0	0	0	0	0	0		0	0	0	0	0	0		0	0	0	0	0	0
996	2020-02-27	1640	1640.0	1640.0	1640.0	1640.0	1640.0	1640.0		0	0	0	0	0	0	0	0	0	0	0	0		0	0	0	0	0	0		0	0	0	0	0	0		0	0	0	0	0	0
997	2020-02-26	1640	1640.0	1640.0	1640.0	1640.0	1640.0	1640.0		0	0	0	0	0	0	0	0	0	0	0	0		0	0	0	0	0	0		0	0	0	0	0	0		0	0	0	0	0	0
998	2020-02-25	1646.9	1646.9	1646.9	1646.9	1646.9	1646.9	1646.9		0	0	0	0	0	0	0	0	0	0	0	0		0	0	0	0	0	0		0	0	0	0	0	0		0	0	0	0	0	0
999	2020-02-24	1672.4	1672.4	1672.4	1672.4	1672.4	1672.4	1672.4		0	0	0	0	0	0	0	0	0	0	0	0		0	0	0	0	0	0		0	0	0	0	0	0		0	0	0	0	0	0
1000	2020-02-21	1644.6	1109.887	1635.656	1634.5	1638.459	1630.550	1173.254		-534.713	534.713	-8.944	8.944	-10.1	10.1	-6.141	6.141	-14.05	14.05	-471.346	471.346		285918	79.9951	102.01	37.7119	197.402	222167		0.325133	0.0054384	0.00614131	0.00373404	0.00854311	0.286602		0.325133	0.0054384	0.00614131	0.00373404	0.00854311	0.286602
1001	2020-02-20	1616.6	1616.6	1616.6	1616.6	1616.6	1616.6	1616.6		0	0	0	0	0	0	0	0	0	0	0	0		0	0	0	0	0	0		0	0	0	0	0	0		0	0	0	0	0	0
1002	2020-02-19	1607.5	1607.5	1607.5	1607.5	1607.5	1607.5	1607.5		0	0	0	0	0	0	0	0	0	0	0	0		0	0	0	0	0	0		0	0	0	0	0	0		0	0	0	0	0	0
1003	2020-02-18	1600	1600.0	1600.0	1600.0	1600.0	1600.0	1600.0		0	0	0	0	0	0	0	0	0	0	0	0		0	0	0	0	0	0		0	0	0	0	0	0		0	0	0	0	0	0
1004	2020-02-14	1582.7	1582.7	1582.7	1582.7	1582.7	1582.7	1582.7		0	0	0	0	0	0	0	0	0	0	0	0		0	0	0	0	0	0		0	0	0	0	0	0		0	0	0	0	0	0
1005	2020-02-13	1575.1	1109.887	1566.446	1573.667	1574.724	1577.0	1165.770		-465.213	465.213	-8.654	8.654	-1.433	1.433	-0.376	0.376	1.9	1.9	-409.33	409.33		216423	74.8917	2.05349	0.141376	3.61	167551		0.295355	0.00549425	0.000909784	0.000238715	-0.00120627	0.259876		0.295355	0.00549425	0.000909784	0.000238715	0.00120627	0.259876
1006	2020-02-12	1567.4	1109.887	1566.446	1566.733	1567.792	1571.3	1164.868		-457.513	457.513	-0.954	0.954	-0.667	0.667	0.392	0.392	3.9	3.9	-402.532	402.532		209318	0.910116	0.444889	0.153664	15.21	162032		0.291893	0.000608651	0.000425545	-0.000250096	-0.0024882	0.256815		0.291893	0.000608651	0.000425545	0.000250096	0.0024882	0.256815
1007	2020-02-11	1565.6	1565.6	1565.6	1565.6	1565.6	1565.6	1565.6		0	0	0	0	0	0	0	0	0	0	0	0		0	0	0	0	0	0		0	0	0	0	0	0		0	0	0	0	0	0
1008	2020-02-10	1574.7	1574.7	1574.7	1574.7	1574.7	1574.7	1574.7		0	0	0	0	0	0	0	0	0	0	0	0		0	0	0	0	0	0		0	0	0	0	0	0		0	0	0	0	0	0
1009	2020-02-07	1568.6	1568.6	1568.6	1568.6	1568.6	1568.6	1568.6		0	0	0	0	0	0	0	0	0	0	0	0		0	0	0	0	0	0		0	0	0	0	0	0		0	0	0	0	0	0
1010	2020-02-06	1565.1	1565.1	1565.1	1565.1	1565.1	1565.1	1565.1		0	0	0	0	0	0	0	0	0	0	0	0		0	0	0	0	0	0		0	0	0	0	0	0		0	0	0	0	0	0
1011	2020-02-05	1557.8	1557.8	1557.8	1557.8	1557.8	1557.8	1557.8		0	0	0	0	0	0	0	0	0	0	0	0		0	0	0	0	0	0		0	0	0	0	0	0		0	0	0	0	0	0
1012	2020-02-04	1550.4	1550.4	1550.4	1550.4	1550.4	1550.4	1550.4		0	0	0	0	0	0	0	0	0	0	0	0		0	0	0	0	0	0		0	0	0	0	0	0		0	0	0	0	0	0
1013	2020-02-03	1577.2	1577.2	1577.2	1577.2	1577.2	1577.2	1577.2		0	0	0	0	0	0	0	0	0	0	0	0		0	0	0	0	0	0		0	0	0	0	0	0		0	0	0	0	0	0
1014	2020-01-31	1582.9	1582.9	1582.9	1582.9	1582.9	1582.9	1582.9		0	0	0	0	0	0	0	0	0	0	0	0		0	0	0	0	0	0		0	0	0	0	0	0		0	0	0	0	0	0
1015	2020-01-30	1583.5	1583.5	1583.5	1583.5	1583.5	1583.5	1583.5		0	0	0	0	0	0	0	0	0	0	0	0		0	0	0	0	0	0		0	0	0	0	0	0		0	0	0	0	0	0
1016	2020-01-29	1569.8	1109.887	1566.446	1572.467	1572.539	1576.350	1165.501		-459.913	459.913	-3.354	3.354	2.667	2.667	2.739	2.739	6.55	6.55	-404.299	404.299		211520	11.2493	7.11289	7.50212	42.9025	163458		0.292976	0.00213658	-0.00169894	-0.00174481	-0.00417251	0.257548		0.292976	0.00213658	0.00169894	0.00174481	0.00417251	0.257548
1017	2020-01-28	1569.2	1569.2	1569.2	1569.2	1569.2	1569.2	1569.2		0	0	0	0	0	0	0	0	0	0	0	0		0	0	0	0	0	0		0	0	0	0	0	0		0	0	0	0	0	0
1018	2020-01-27	1576.8	1576.8	1576.8	1576.8	1576.8	1576.8	1576.8		0	0	0	0	0	0	0	0	0	0	0	0		0	0	0	0	0	0		0	0	0	0	0	0		0	0	0	0	0	0
1019	2020-01-24	1571.1	1571.1	1571.1	1571.1	1571.1	1571.1	1571.1		0	0	0	0	0	0	0	0	0	0	0	0		0	0	0	0	0	0		0	0	0	0	0	0		0	0	0	0	0	0
1020	2020-01-23	1564.6	1564.6	1564.6	1564.6	1564.6	1564.6	1564.6		0	0	0	0	0	0	0	0	0	0	0	0		0	0	0	0	0	0		0	0	0	0	0	0		0	0	0	0	0	0
1021	2020-01-22	1555.3	1555.3	1555.3	1555.3	1555.3	1555.3	1555.3		0	0	0	0	0	0	0	0	0	0	0	0		0	0	0	0	0	0		0	0	0	0	0	0		0	0	0	0	0	0
1022	2020-01-21	1556.4	1556.4	1556.4	1556.4	1556.4	1556.4	1556.4		0	0	0	0	0	0	0	0	0	0	0	0		0	0	0	0	0	0		0	0	0	0	0	0		0	0	0	0	0	0
1023	2020-01-17	1558.8	1558.8	1558.8	1558.8	1558.8	1558.8	1558.8		0	0	0	0	0	0	0	0	0	0	0	0		0	0	0	0	0	0		0	0	0	0	0	0		0	0	0	0	0	0
1024	2020-01-16	1549	1549.0	1549.0	1549.0	1549.0	1549.0	1549.0		0	0	0	0	0	0	0	0	0	0	0	0		0	0	0	0	0	0		0	0	0	0	0	0		0	0	0	0	0	0
1025	2020-01-15	1552.1	1552.1	1552.1	1552.1	1552.1	1552.1	1552.1		0	0	0	0	0	0	0	0	0	0	0	0		0	0	0	0	0	0		0	0	0	0	0	0		0	0	0	0	0	0
1026	2020-01-14	1542.4	1542.4	1542.4	1542.4	1542.4	1542.4	1542.4		0	0	0	0	0	0	0	0	0	0	0	0		0	0	0	0	0	0		0	0	0	0	0	0		0	0	0	0	0	0
1027	2020-01-13	1548.4	1548.4	1548.4	1548.4	1548.4	1548.4	1548.4		0	0	0	0	0	0	0	0	0	0	0	0		0	0	0	0	0	0		0	0	0	0	0	0		0	0	0	0	0	0
1028	2020-01-10	1557.5	1557.5	1557.5	1557.5	1557.5	1557.5	1557.5		0	0	0	0	0	0	0	0	0	0	0	0		0	0	0	0	0	0		0	0	0	0	0	0		0	0	0	0	0	0
1029	2020-01-09	1551.7	1551.7	1551.7	1551.7	1551.7	1551.7	1551.7		0	0	0	0	0	0	0	0	0	0	0	0		0	0	0	0	0	0		0	0	0	0	0	0		0	0	0	0	0	0
1030	2020-01-08	1557.4	1557.4	1557.4	1557.4	1557.4	1557.4	1557.4		0	0	0	0	0	0	0	0	0	0	0	0		0	0	0	0	0	0		0	0	0	0	0	0		0	0	0	0	0	0
1031	2020-01-07	1571.8	1571.8	1571.8	1571.8	1571.8	1571.8	1571.8		0	0	0	0	0	0	0	0	0	0	0	0		0	0	0	0	0	0		0	0	0	0	0	0		0	0	0	0	0	0
1032	2020-01-06	1566.2	1566.2	1566.2	1566.2	1566.2	1566.2	1566.2		0	0	0	0	0	0	0	0	0	0	0	0		0	0	0	0	0	0		0	0	0	0	0	0		0	0	0	0	0	0
1033	2020-01-03	1549.2	1549.2	1549.2	1549.2	1549.2	1549.2	1549.2		0	0	0	0	0	0	0	0	0	0	0	0		0	0	0	0	0	0		0	0	0	0	0	0		0	0	0	0	0	0
1034	2020-01-02	1524.5	1524.5	1524.5	1524.5	1524.5	1524.5	1524.5		0	0	0	0	0	0	0	0	0	0	0	0		0	0	0	0	0	0		0	0	0	0	0	0		0	0	0	0	0	0
1035	2019-12-31	1519.5	1519.5	1519.5	1519.5	1519.5	1519.5	1519.5		0	0	0	0	0	0	0	0	0	0	0	0		0	0	0	0	0	0		0	0	0	0	0	0		0	0	0	0	0	0
1036	2019-12-30	1514.5	1514.5	1514.5	1514.5	1514.5	1514.5	1514.5		0	0	0	0	0	0	0	0	0	0	0	0		0	0	0	0	0	0		0	0	0	0	0	0		0	0	0	0	0	0
1037	2019-12-27	1513.8	1109.887	1516.367	1512.6	1518.869	1510.6	1158.339		-403.913	403.913	2.567	2.567	-1.2	1.2	5.069	5.069	-3.2	3.2	-355.461	355.461		163146	6.58949	1.44	25.6948	10.24	126353		0.266821	-0.00169573	0.000792707	-0.00334853	0.00211389	0.234814		0.266821	0.00169573	0.000792707	0.00334853	0.00211389	0.234814
1038	2019-12-26	1509.3	1509.3	1509.3	1509.3	1509.3	1509.3	1509.3		0	0	0	0	0	0	0	0	0	0	0	0		0	0	0	0	0	0		0	0	0	0	0	0		0	0	0	0	0	0
1039	2019-12-24	1499.1	1499.1	1499.1	1499.1	1499.1	1499.1	1499.1		0	0	0	0	0	0	0	0	0	0	0	0		0	0	0	0	0	0		0	0	0	0	0	0		0	0	0	0	0	0
1040	2019-12-23	1482.5	1109.887	1475.963	1484.567	1485.709	1493.0	1154.439		-372.613	372.613	-6.537	6.537	2.067	2.067	3.209	3.209	10.5	10.5	-328.061	328.061		138840	42.7324	4.27249	10.2977	110.25	107624		0.251341	0.00440944	-0.00139427	-0.00216459	-0.00708263	0.221289		0.251341	0.00440944	0.00139427	0.00216459	0.00708263	0.221289
1041	2019-12-20	1474.7	1474.7	1474.7	1474.7	1474.7	1474.7	1474.7		0	0	0	0	0	0	0	0	0	0	0	0		0	0	0	0	0	0		0	0	0	0	0	0		0	0	0	0	0	0
1042	2019-12-19	1478.2	1478.2	1478.2	1478.2	1478.2	1478.2	1478.2		0	0	0	0	0	0	0	0	0	0	0	0		0	0	0	0	0	0		0	0	0	0	0	0		0	0	0	0	0	0
1043	2019-12-18	1472.6	1472.6	1472.6	1472.6	1472.6	1472.6	1472.6		0	0	0	0	0	0	0	0	0	0	0	0		0	0	0	0	0	0		0	0	0	0	0	0		0	0	0	0	0	0
1044	2019-12-17	1474.6	1474.6	1474.6	1474.6	1474.6	1474.6	1474.6		0	0	0	0	0	0	0	0	0	0	0	0		0	0	0	0	0	0		0	0	0	0	0	0		0	0	0	0	0	0
1045	2019-12-16	1475	1475.0	1475.0	1475.0	1475.0	1475.0	1475.0		0	0	0	0	0	0	0	0	0	0	0	0		0	0	0	0	0	0		0	0	0	0	0	0		0	0	0	0	0	0
1046	2019-12-13	1475.6	1475.6	1475.6	1475.6	1475.6	1475.6	1475.6		0	0	0	0	0	0	0	0	0	0	0	0		0	0	0	0	0	0		0	0	0	0	0	0		0	0	0	0	0	0
1047	2019-12-12	1466.7	1466.7	1466.7	1466.7	1466.7	1466.7	1466.7		0	0	0	0	0	0	0	0	0	0	0	0		0	0	0	0	0	0		0	0	0	0	0	0		0	0	0	0	0	0
1048	2019-12-11	1469.4	1469.4	1469.4	1469.4	1469.4	1469.4	1469.4		0	0	0	0	0	0	0	0	0	0	0	0		0	0	0	0	0	0		0	0	0	0	0	0		0	0	0	0	0	0
1049	2019-12-10	1462.6	1109.887	1458.200	1464.733	1459.001	1464.350	1152.264		-352.713	352.713	-4.4	4.4	2.133	2.133	-3.599	3.599	1.75	1.75	-310.336	310.336		124406	19.36	4.54969	12.9528	3.0625	96308.4		0.241155	0.00300834	-0.00145836	0.00246069	-0.0011965	0.212181		0.241155	0.00300834	0.00145836	0.00246069	0.0011965	0.212181
1050	2019-12-09	1459.3	1459.3	1459.3	1459.3	1459.3	1459.3	1459.3		0	0	0	0	0	0	0	0	0	0	0	0		0	0	0	0	0	0		0	0	0	0	0	0		0	0	0	0	0	0
1051	2019-12-06	1459.1	1459.1	1459.1	1459.1	1459.1	1459.1	1459.1		0	0	0	0	0	0	0	0	0	0	0	0		0	0	0	0	0	0		0	0	0	0	0	0		0	0	0	0	0	0
1052	2019-12-05	1476.9	1476.9	1476.9	1476.9	1476.9	1476.9	1476.9		0	0	0	0	0	0	0	0	0	0	0	0		0	0	0	0	0	0		0	0	0	0	0	0		0	0	0	0	0	0
1053	2019-12-04	1474	1474.0	1474.0	1474.0	1474.0	1474.0	1474.0		0	0	0	0	0	0	0	0	0	0	0	0		0	0	0	0	0	0		0	0	0	0	0	0		0	0	0	0	0	0
1054	2019-12-03	1478.2	1478.2	1478.2	1478.2	1478.2	1478.2	1478.2		0	0	0	0	0	0	0	0	0	0	0	0		0	0	0	0	0	0		0	0	0	0	0	0		0	0	0	0	0	0
1055	2019-12-02	1462.3	1462.3	1462.3	1462.3	1462.3	1462.3	1462.3		0	0	0	0	0	0	0	0	0	0	0	0		0	0	0	0	0	0		0	0	0	0	0	0		0	0	0	0	0	0
1056	2019-11-29	1465.6	1465.6	1465.6	1465.6	1465.6	1465.6	1465.6		0	0	0	0	0	0	0	0	0	0	0	0		0	0	0	0	0	0		0	0	0	0	0	0		0	0	0	0	0	0
1057	2019-11-27	1453.4	1453.4	1453.4	1453.4	1453.4	1453.4	1453.4		0	0	0	0	0	0	0	0	0	0	0	0		0	0	0	0	0	0		0	0	0	0	0	0		0	0	0	0	0	0
1058	2019-11-26	1459.8	1459.8	1459.8	1459.8	1459.8	1459.8	1459.8		0	0	0	0	0	0	0	0	0	0	0	0		0	0	0	0	0	0		0	0	0	0	0	0		0	0	0	0	0	0
1059	2019-11-25	1456.6	1456.6	1456.6	1456.6	1456.6	1456.6	1456.6		0	0	0	0	0	0	0	0	0	0	0	0		0	0	0	0	0	0		0	0	0	0	0	0		0	0	0	0	0	0
1060	2019-11-22	1463.1	1463.1	1463.1	1463.1	1463.1	1463.1	1463.1		0	0	0	0	0	0	0	0	0	0	0	0		0	0	0	0	0	0		0	0	0	0	0	0		0	0	0	0	0	0
1061	2019-11-21	1463.1	1463.1	1463.1	1463.1	1463.1	1463.1	1463.1		0	0	0	0	0	0	0	0	0	0	0	0		0	0	0	0	0	0		0	0	0	0	0	0		0	0	0	0	0	0
1062	2019-11-20	1473.3	1473.3	1473.3	1473.3	1473.3	1473.3	1473.3		0	0	0	0	0	0	0	0	0	0	0	0		0	0	0	0	0	0		0	0	0	0	0	0		0	0	0	0	0	0
1063	2019-11-19	1473.3	1473.3	1473.3	1473.3	1473.3	1473.3	1473.3		0	0	0	0	0	0	0	0	0	0	0	0		0	0	0	0	0	0		0	0	0	0	0	0		0	0	0	0	0	0
1064	2019-11-18	1470.9	1109.887	1475.963	1471.067	1475.833	1471.8	1153.228		-361.013	361.013	5.063	5.063	0.167	0.167	4.933	4.933	0.9	0.9	-317.672	317.672		130330	25.634	0.027889	24.3345	0.81	100915		0.245437	-0.00344211	-0.000113536	-0.00335373	-0.00061187	0.215971		0.245437	0.00344211	0.000113536	0.00335373	0.00061187	0.215971
1065	2019-11-15	1467.3	1467.3	1467.3	1467.3	1467.3	1467.3	1467.3		0	0	0	0	0	0	0	0	0	0	0	0		0	0	0	0	0	0		0	0	0	0	0	0		0	0	0	0	0	0
1066	2019-11-14	1471.8	1471.8	1471.8	1471.8	1471.8	1471.8	1471.8		0	0	0	0	0	0	0	0	0	0	0	0		0	0	0	0	0	0		0	0	0	0	0	0		0	0	0	0	0	0
1067	2019-11-13	1461.7	1109.887	1458.200	1457.567	1459.618	1461.950	1151.819		-351.813	351.813	-3.5	3.5	-4.133	4.133	-2.082	2.082	0.25	0.25	-309.881	309.881		123772	12.25	17.0817	4.33472	0.0625	96026.2		0.240688	0.00239447	0.00282753	0.00142437	-0.000171034	0.212		0.240688	0.00239447	0.00282753	0.00142437	0.000171034	0.212
1068	2019-11-12	1452.1	1452.1	1452.1	1452.1	1452.1	1452.1	1452.1		0	0	0	0	0	0	0	0	0	0	0	0		0	0	0	0	0	0		0	0	0	0	0	0		0	0	0	0	0	0
1069	2019-11-11	1455.5	1455.5	1455.5	1455.5	1455.5	1455.5	1455.5		0	0	0	0	0	0	0	0	0	0	0	0		0	0	0	0	0	0		0	0	0	0	0	0		0	0	0	0	0	0
1070	2019-11-08	1461.3	1461.3	1461.3	1461.3	1461.3	1461.3	1461.3		0	0	0	0	0	0	0	0	0	0	0	0		0	0	0	0	0	0		0	0	0	0	0	0		0	0	0	0	0	0
1071	2019-11-07	1464.2	1464.2	1464.2	1464.2	1464.2	1464.2	1464.2		0	0	0	0	0	0	0	0	0	0	0	0		0	0	0	0	0	0		0	0	0	0	0	0		0	0	0	0	0	0
1072	2019-11-06	1490.2	1490.2	1490.2	1490.2	1490.2	1490.2	1490.2		0	0	0	0	0	0	0	0	0	0	0	0		0	0	0	0	0	0		0	0	0	0	0	0		0	0	0	0	0	0
1073	2019-11-05	1480.8	1480.8	1480.8	1480.8	1480.8	1480.8	1480.8		0	0	0	0	0	0	0	0	0	0	0	0		0	0	0	0	0	0		0	0	0	0	0	0		0	0	0	0	0	0
1074	2019-11-04	1508	1508.0	1508.0	1508.0	1508.0	1508.0	1508.0		0	0	0	0	0	0	0	0	0	0	0	0		0	0	0	0	0	0		0	0	0	0	0	0		0	0	0	0	0	0
1075	2019-10-31	1508	1508.0	1508.0	1508.0	1508.0	1508.0	1508.0		0	0	0	0	0	0	0	0	0	0	0	0		0	0	0	0	0	0		0	0	0	0	0	0		0	0	0	0	0	0
1076	2019-10-30	1511.4	1511.4	1511.4	1511.4	1511.4	1511.4	1511.4		0	0	0	0	0	0	0	0	0	0	0	0		0	0	0	0	0	0		0	0	0	0	0	0		0	0	0	0	0	0
1077	2019-10-29	1493.2	1493.2	1493.2	1493.2	1493.2	1493.2	1493.2		0	0	0	0	0	0	0	0	0	0	0	0		0	0	0	0	0	0		0	0	0	0	0	0		0	0	0	0	0	0
1078	2019-10-28	1487	1487.0	1487.0	1487.0	1487.0	1487.0	1487.0		0	0	0	0	0	0	0	0	0	0	0	0		0	0	0	0	0	0		0	0	0	0	0	0		0	0	0	0	0	0
1079	2019-10-27	1490	1109.887	1499.462	1499.067	1497.857	1491.167	1156.572		-380.113	380.113	9.462	9.462	9.067	9.067	7.857	7.857	1.167	1.167	-333.428	333.428		144486	89.5294	82.2105	61.7324	1.36189	111174		0.255109	-0.00635034	-0.00608523	-0.00527315	-0.000783221	0.223777		0.255109	0.00635034	0.00608523	0.00527315	0.000783221	0.223777
1080	2019-10-25	1499.5	1499.5	1499.5	1499.5	1499.5	1499.5	1499.5		0	0	0	0	0	0	0	0	0	0	0	0		0	0	0	0	0	0		0	0	0	0	0	0		0	0	0	0	0	0
1081	2019-10-23	1498.9	1498.9	1498.9	1498.9	1498.9	1498.9	1498.9		0	0	0	0	0	0	0	0	0	0	0	0		0	0	0	0	0	0		0	0	0	0	0	0		0	0	0	0	0	0
1082	2019-10-22	1489.9	1489.9	1489.9	1489.9	1489.9	1489.9	1489.9		0	0	0	0	0	0	0	0	0	0	0	0		0	0	0	0	0	0		0	0	0	0	0	0		0	0	0	0	0	0
1083	2019-10-21	1481.7	1481.7	1481.7	1481.7	1481.7	1481.7	1481.7		0	0	0	0	0	0	0	0	0	0	0	0		0	0	0	0	0	0		0	0	0	0	0	0		0	0	0	0	0	0
1084	2019-10-20	1482.4	1109.887	1487.118	1489.667	1488.772	1483.325	1155.095		-372.513	372.513	4.718	4.718	7.267	7.267	6.372	6.372	0.925	0.925	-327.305	327.305		138766	22.2595	52.8093	40.6024	0.855625	107129		0.25129	-0.00318268	-0.00490219	-0.00429843	-0.000623988	0.220794		0.25129	0.00318268	0.00490219	0.00429843	0.000623988	0.220794
1085	2019-10-17	1488.2	1488.2	1488.2	1488.2	1488.2	1488.2	1488.2		0	0	0	0	0	0	0	0	0	0	0	0		0	0	0	0	0	0		0	0	0	0	0	0		0	0	0	0	0	0
1086	2019-10-16	1492.3	1492.3	1492.3	1492.3	1492.3	1492.3	1492.3		0	0	0	0	0	0	0	0	0	0	0	0		0	0	0	0	0	0		0	0	0	0	0	0		0	0	0	0	0	0
1087	2019-10-15	1488	1488.0	1488.0	1488.0	1488.0	1488.0	1488.0		0	0	0	0	0	0	0	0	0	0	0	0		0	0	0	0	0	0		0	0	0	0	0	0		0	0	0	0	0	0
1088	2019-10-14	1477.6	1477.6	1477.6	1477.6	1477.6	1477.6	1477.6		0	0	0	0	0	0	0	0	0	0	0	0		0	0	0	0	0	0		0	0	0	0	0	0		0	0	0	0	0	0
1089	2019-10-13	1491.7	1491.7	1491.7	1491.7	1491.7	1491.7	1491.7		0	0	0	0	0	0	0	0	0	0	0	0		0	0	0	0	0	0		0	0	0	0	0	0		0	0	0	0	0	0
1090	2019-10-10	1482.7	1482.7	1482.7	1482.7	1482.7	1482.7	1482.7		0	0	0	0	0	0	0	0	0	0	0	0		0	0	0	0	0	0		0	0	0	0	0	0		0	0	0	0	0	0
1091	2019-10-09	1494.8	1494.8	1494.8	1494.8	1494.8	1494.8	1494.8		0	0	0	0	0	0	0	0	0	0	0	0		0	0	0	0	0	0		0	0	0	0	0	0		0	0	0	0	0	0
1092	2019-10-08	1506.1	1506.1	1506.1	1506.1	1506.1	1506.1	1506.1		0	0	0	0	0	0	0	0	0	0	0	0		0	0	0	0	0	0		0	0	0	0	0	0		0	0	0	0	0	0
1093	2019-10-07	1497.2	1497.2	1497.2	1497.2	1497.2	1497.2	1497.2		0	0	0	0	0	0	0	0	0	0	0	0		0	0	0	0	0	0		0	0	0	0	0	0		0	0	0	0	0	0
1094	2019-10-06	1497.7	1497.7	1497.7	1497.7	1497.7	1497.7	1497.7		0	0	0	0	0	0	0	0	0	0	0	0		0	0	0	0	0	0		0	0	0	0	0	0		0	0	0	0	0	0
1095	2019-10-03	1506.2	1506.2	1506.2	1506.2	1506.2	1506.2	1506.2		0	0	0	0	0	0	0	0	0	0	0	0		0	0	0	0	0	0		0	0	0	0	0	0		0	0	0	0	0	0
1096	2019-10-02	1507.1	1109.887	1514.150	1508.667	1509.330	1503.6	1157.137		-397.213	397.213	7.05	7.05	1.567	1.567	2.23	2.23	-3.5	3.5	-349.963	349.963		157778	49.7025	2.45549	4.9729	12.25	122474		0.263561	-0.00467786	-0.00103975	-0.00147966	0.00232234	0.23221		0.263561	0.00467786	0.00103975	0.00147966	0.00232234	0.23221
1097	2019-10-01	1501	1501.0	1501.0	1501.0	1501.0	1501.0	1501.0		0	0	0	0	0	0	0	0	0	0	0	0		0	0	0	0	0	0		0	0	0	0	0	0		0	0	0	0	0	0
1098	2019-09-30	1482	1482.0	1482.0	1482.0	1482.0	1482.0	1482.0		0	0	0	0	0	0	0	0	0	0	0	0		0	0	0	0	0	0		0	0	0	0	0	0		0	0	0	0	0	0
1099	2019-09-29	1465.7	1465.7	1465.7	1465.7	1465.7	1465.7	1465.7		0	0	0	0	0	0	0	0	0	0	0	0		0	0	0	0	0	0		0	0	0	0	0	0		0	0	0	0	0	0
1100	2019-09-26	1499.1	1499.1	1499.1	1499.1	1499.1	1499.1	1499.1		0	0	0	0	0	0	0	0	0	0	0	0		0	0	0	0	0	0		0	0	0	0	0	0		0	0	0	0	0	0
1101	2019-09-25	1507.5	1109.887	1516.367	1513.333	1506.638	1501.850	1157.562		-397.613	397.613	8.867	8.867	5.833	5.833	-0.862	0.862	-5.65	5.65	-349.938	349.938		158096	78.6237	34.0239	0.743044	31.9225	122457		0.263757	-0.00588192	-0.00386932	0.000571808	0.00374793	0.232131		0.263757	0.00588192	0.00386932	0.000571808	0.00374793	0.232131
1102	2019-09-24	1504.6	1504.6	1504.6	1504.6	1504.6	1504.6	1504.6		0	0	0	0	0	0	0	0	0	0	0	0		0	0	0	0	0	0		0	0	0	0	0	0		0	0	0	0	0	0
1103	2019-09-23	1532.1	1532.1	1532.1	1532.1	1532.1	1532.1	1532.1		0	0	0	0	0	0	0	0	0	0	0	0		0	0	0	0	0	0		0	0	0	0	0	0		0	0	0	0	0	0
1104	2019-09-22	1523.7	1109.887	1526.822	1522.6	1524.715	1525.9	1158.890		-413.813	413.813	3.122	3.122	-1.1	1.1	1.015	1.015	2.2	2.2	-364.81	364.81		171241	9.74688	1.21	1.03022	4.84	133086		0.271584	-0.00204896	0.000721927	-0.000666142	-0.00144385	0.239424		0.271584	0.00204896	0.000721927	0.000666142	0.00144385	0.239424
1105	2019-09-19	1507.3	1507.3	1507.3	1507.3	1507.3	1507.3	1507.3		0	0	0	0	0	0	0	0	0	0	0	0		0	0	0	0	0	0		0	0	0	0	0	0		0	0	0	0	0	0
1106	2019-09-18	1498.4	1498.4	1498.4	1498.4	1498.4	1498.4	1498.4		0	0	0	0	0	0	0	0	0	0	0	0		0	0	0	0	0	0		0	0	0	0	0	0		0	0	0	0	0	0
1107	2019-09-17	1507.5	1507.5	1507.5	1507.5	1507.5	1507.5	1507.5		0	0	0	0	0	0	0	0	0	0	0	0		0	0	0	0	0	0		0	0	0	0	0	0		0	0	0	0	0	0
1108	2019-09-16	1505.1	1505.1	1505.1	1505.1	1505.1	1505.1	1505.1		0	0	0	0	0	0	0	0	0	0	0	0		0	0	0	0	0	0		0	0	0	0	0	0		0	0	0	0	0	0
1109	2019-09-15	1503.1	1503.1	1503.1	1503.1	1503.1	1503.1	1503.1		0	0	0	0	0	0	0	0	0	0	0	0		0	0	0	0	0	0		0	0	0	0	0	0		0	0	0	0	0	0
1110	2019-09-12	1490.9	1490.9	1490.9	1490.9	1490.9	1490.9	1490.9		0	0	0	0	0	0	0	0	0	0	0	0		0	0	0	0	0	0		0	0	0	0	0	0		0	0	0	0	0	0
1111	2019-09-11	1498.7	1498.7	1498.7	1498.7	1498.7	1498.7	1498.7		0	0	0	0	0	0	0	0	0	0	0	0		0	0	0	0	0	0		0	0	0	0	0	0		0	0	0	0	0	0
1112	2019-09-10	1494.4	1109.887	1499.462	1494.667	1489.265	1494.5	1155.782		-384.513	384.513	5.062	5.062	0.267	0.267	-5.135	5.135	0.1	0.1	-338.618	338.618		147850	25.6238	0.071289	26.3682	0.01	114662		0.257303	-0.00338731	-0.000178667	0.00343616	-6.69165e-05	0.226591		0.257303	0.00338731	0.000178667	0.00343616	6.69165e-05	0.226591
1113	2019-09-09	1490.3	1490.3	1490.3	1490.3	1490.3	1490.3	1490.3		0	0	0	0	0	0	0	0	0	0	0	0		0	0	0	0	0	0		0	0	0	0	0	0		0	0	0	0	0	0
1114	2019-09-08	1502.2	1502.2	1502.2	1502.2	1502.2	1502.2	1502.2		0	0	0	0	0	0	0	0	0	0	0	0		0	0	0	0	0	0		0	0	0	0	0	0		0	0	0	0	0	0
1115	2019-09-05	1506.2	1506.2	1506.2	1506.2	1506.2	1506.2	1506.2		0	0	0	0	0	0	0	0	0	0	0	0		0	0	0	0	0	0		0	0	0	0	0	0		0	0	0	0	0	0
1116	2019-09-04	1515.4	1515.4	1515.4	1515.4	1515.4	1515.4	1515.4		0	0	0	0	0	0	0	0	0	0	0	0		0	0	0	0	0	0		0	0	0	0	0	0		0	0	0	0	0	0
1117	2019-09-03	1550.3	1550.3	1550.3	1550.3	1550.3	1550.3	1550.3		0	0	0	0	0	0	0	0	0	0	0	0		0	0	0	0	0	0		0	0	0	0	0	0		0	0	0	0	0	0
1118	2019-09-02	1545.9	1545.9	1545.9	1545.9	1545.9	1545.9	1545.9		0	0	0	0	0	0	0	0	0	0	0	0		0	0	0	0	0	0		0	0	0	0	0	0		0	0	0	0	0	0
1119	2019-08-29	1519.1	1519.1	1519.1	1519.1	1519.1	1519.1	1519.1		0	0	0	0	0	0	0	0	0	0	0	0		0	0	0	0	0	0		0	0	0	0	0	0		0	0	0	0	0	0
1120	2019-08-28	1526.5	1526.5	1526.5	1526.5	1526.5	1526.5	1526.5		0	0	0	0	0	0	0	0	0	0	0	0		0	0	0	0	0	0		0	0	0	0	0	0		0	0	0	0	0	0
1121	2019-08-27	1537.8	1537.8	1537.8	1537.8	1537.8	1537.8	1537.8		0	0	0	0	0	0	0	0	0	0	0	0		0	0	0	0	0	0		0	0	0	0	0	0		0	0	0	0	0	0
1122	2019-08-26	1541	1541.0	1541.0	1541.0	1541.0	1541.0	1541.0		0	0	0	0	0	0	0	0	0	0	0	0		0	0	0	0	0	0		0	0	0	0	0	0		0	0	0	0	0	0
1123	2019-08-25	1526.3	1526.3	1526.3	1526.3	1526.3	1526.3	1526.3		0	0	0	0	0	0	0	0	0	0	0	0		0	0	0	0	0	0		0	0	0	0	0	0		0	0	0	0	0	0
1124	2019-08-22	1526.6	1526.6	1526.6	1526.6	1526.6	1526.6	1526.6		0	0	0	0	0	0	0	0	0	0	0	0		0	0	0	0	0	0		0	0	0	0	0	0		0	0	0	0	0	0
1125	2019-08-21	1497.3	1497.3	1497.3	1497.3	1497.3	1497.3	1497.3		0	0	0	0	0	0	0	0	0	0	0	0		0	0	0	0	0	0		0	0	0	0	0	0		0	0	0	0	0	0
1126	2019-08-20	1504.6	1109.887	1504.646	1505.133	1503.329	1500.950	1157.000		-394.713	394.713	0.046	0.046	0.533	0.533	-1.271	1.271	-3.65	3.65	-347.6	347.6		155798	0.002116	0.284089	1.61544	13.3225	120826		0.262337	-3.05729e-05	-0.000354247	0.000844743	0.00242589	0.231025		0.262337	3.05729e-05	0.000354247	0.000844743	0.00242589	0.231025
1127	2019-08-19	1504.6	1504.6	1504.6	1504.6	1504.6	1504.6	1504.6		0	0	0	0	0	0	0	0	0	0	0	0		0	0	0	0	0	0		0	0	0	0	0	0		0	0	0	0	0	0
1128	2019-08-18	1500.4	1500.4	1500.4	1500.4	1500.4	1500.4	1500.4		0	0	0	0	0	0	0	0	0	0	0	0		0	0	0	0	0	0		0	0	0	0	0	0		0	0	0	0	0	0
1129	2019-08-15	1512.5	1512.5	1512.5	1512.5	1512.5	1512.5	1512.5		0	0	0	0	0	0	0	0	0	0	0	0		0	0	0	0	0	0		0	0	0	0	0	0		0	0	0	0	0	0
1130	2019-08-14	1519.6	1519.6	1519.6	1519.6	1519.6	1519.6	1519.6		0	0	0	0	0	0	0	0	0	0	0	0		0	0	0	0	0	0		0	0	0	0	0	0		0	0	0	0	0	0
1131	2019-08-13	1515.9	1515.9	1515.9	1515.9	1515.9	1515.9	1515.9		0	0	0	0	0	0	0	0	0	0	0	0		0	0	0	0	0	0		0	0	0	0	0	0		0	0	0	0	0	0
1132	2019-08-12	1502.2	1502.2	1502.2	1502.2	1502.2	1502.2	1502.2		0	0	0	0	0	0	0	0	0	0	0	0		0	0	0	0	0	0		0	0	0	0	0	0		0	0	0	0	0	0
1133	2019-08-11	1505.3	1109.887	1501.655	1506.267	1504.585	1500.8	1156.599		-395.413	395.413	-3.645	3.645	0.967	0.967	-0.715	0.715	-4.5	4.5	-348.701	348.701		156351	13.286	0.935089	0.511225	20.25	121592		0.262681	0.00242144	-0.000642397	0.000474988	0.00298944	0.231649		0.262681	0.00242144	0.000642397	0.000474988	0.00298944	0.231649
1134	2019-08-08	1496.6	1496.6	1496.6	1496.6	1496.6	1496.6	1496.6		0	0	0	0	0	0	0	0	0	0	0	0		0	0	0	0	0	0		0	0	0	0	0	0		0	0	0	0	0	0
1135	2019-08-07	1497.7	1497.7	1497.7	1497.7	1497.7	1497.7	1497.7		0	0	0	0	0	0	0	0	0	0	0	0		0	0	0	0	0	0		0	0	0	0	0	0		0	0	0	0	0	0
1136	2019-08-06	1507.3	1507.3	1507.3	1507.3	1507.3	1507.3	1507.3		0	0	0	0	0	0	0	0	0	0	0	0		0	0	0	0	0	0		0	0	0	0	0	0		0	0	0	0	0	0
1137	2019-08-05	1472.4	1472.4	1472.4	1472.4	1472.4	1472.4	1472.4		0	0	0	0	0	0	0	0	0	0	0	0		0	0	0	0	0	0		0	0	0	0	0	0		0	0	0	0	0	0
1138	2019-08-04	1464.6	1109.887	1442.767	1459.733	1449.015	1465.7	1150.813		-354.713	354.713	-21.833	21.833	-4.867	4.867	-15.585	15.585	1.1	1.1	-313.787	313.787		125821	476.68	23.6877	242.892	1.21	98462.3		0.242191	0.0149071	0.00332309	0.0106411	-0.000751058	0.214248		0.242191	0.0149071	0.00332309	0.0106411	0.000751058	0.214248
1139	2019-08-01	1445.6	1445.6	1445.6	1445.6	1445.6	1445.6	1445.6		0	0	0	0	0	0	0	0	0	0	0	0		0	0	0	0	0	0		0	0	0	0	0	0		0	0	0	0	0	0
1140	2019-07-31	1420.9	1420.9	1420.9	1420.9	1420.9	1420.9	1420.9		0	0	0	0	0	0	0	0	0	0	0	0		0	0	0	0	0	0		0	0	0	0	0	0		0	0	0	0	0	0
1141	2019-07-30	1426.1	1426.1	1426.1	1426.1	1426.1	1426.1	1426.1		0	0	0	0	0	0	0	0	0	0	0	0		0	0	0	0	0	0		0	0	0	0	0	0		0	0	0	0	0	0
1142	2019-07-29	1429.7	1429.7	1429.7	1429.7	1429.7	1429.7	1429.7		0	0	0	0	0	0	0	0	0	0	0	0		0	0	0	0	0	0		0	0	0	0	0	0		0	0	0	0	0	0
1143	2019-07-28	1419.6	1419.6	1419.6	1419.6	1419.6	1419.6	1419.6		0	0	0	0	0	0	0	0	0	0	0	0		0	0	0	0	0	0		0	0	0	0	0	0		0	0	0	0	0	0
1144	2019-07-25	1418.5	1418.5	1418.5	1418.5	1418.5	1418.5	1418.5		0	0	0	0	0	0	0	0	0	0	0	0		0	0	0	0	0	0		0	0	0	0	0	0		0	0	0	0	0	0
1145	2019-07-24	1413.9	1413.9	1413.9	1413.9	1413.9	1413.9	1413.9		0	0	0	0	0	0	0	0	0	0	0	0		0	0	0	0	0	0		0	0	0	0	0	0		0	0	0	0	0	0
1146	2019-07-23	1422.8	1422.8	1422.8	1422.8	1422.8	1422.8	1422.8		0	0	0	0	0	0	0	0	0	0	0	0		0	0	0	0	0	0		0	0	0	0	0	0		0	0	0	0	0	0
1147	2019-07-22	1420.1	1420.1	1420.1	1420.1	1420.1	1420.1	1420.1		0	0	0	0	0	0	0	0	0	0	0	0		0	0	0	0	0	0		0	0	0	0	0	0		0	0	0	0	0	0
1148	2019-07-21	1425.3	1425.3	1425.3	1425.3	1425.3	1425.3	1425.3		0	0	0	0	0	0	0	0	0	0	0	0		0	0	0	0	0	0		0	0	0	0	0	0		0	0	0	0	0	0
1149	2019-07-18	1425.1	1425.1	1425.1	1425.1	1425.1	1425.1	1425.1		0	0	0	0	0	0	0	0	0	0	0	0		0	0	0	0	0	0		0	0	0	0	0	0		0	0	0	0	0	0
1150	2019-07-17	1426.1	1426.1	1426.1	1426.1	1426.1	1426.1	1426.1		0	0	0	0	0	0	0	0	0	0	0	0		0	0	0	0	0	0		0	0	0	0	0	0		0	0	0	0	0	0
1151	2019-07-16	1421.3	1421.3	1421.3	1421.3	1421.3	1421.3	1421.3		0	0	0	0	0	0	0	0	0	0	0	0		0	0	0	0	0	0		0	0	0	0	0	0		0	0	0	0	0	0
1152	2019-07-15	1409.2	1109.887	1410.840	1410.067	1413.534	1418.467	1146.570		-299.313	299.313	1.64	1.64	0.867	0.867	4.334	4.334	9.267	9.267	-262.63	262.63		89588.3	2.6896	0.751689	18.7836	85.8773	68974.5		0.212399	-0.00116378	-0.000615243	-0.0030755	-0.00657607	0.186368		0.212399	0.00116378	0.000615243	0.0030755	0.00657607	0.186368
1153	2019-07-14	1411.4	1109.887	1419.287	1415.067	1415.206	1415.633	1146.866		-301.513	301.513	7.887	7.887	3.667	3.667	3.806	3.806	4.233	4.233	-264.534	264.534		90910.1	62.2048	13.4469	14.4856	17.9183	69978.2		0.213627	-0.00558807	-0.00259813	-0.00269661	-0.00299915	0.187427		0.213627	0.00558807	0.00259813	0.00269661	0.00299915	0.187427
1154	2019-07-11	1409.9	1109.887	1410.840	1411.033	1414.467	1407.133	1146.191		-300.013	300.013	0.94	0.94	1.133	1.133	4.567	4.567	-2.767	2.767	-263.709	263.709		90007.8	0.8836	1.28369	20.8575	7.65629	69542.4		0.21279	-0.000666714	-0.000803603	-0.00323924	0.00196255	0.187041		0.21279	0.000666714	0.000803603	0.00323924	0.00196255	0.187041
1155	2019-07-10	1404.3	1404.3	1404.3	1404.3	1404.3	1404.3	1404.3		0	0	0	0	0	0	0	0	0	0	0	0		0	0	0	0	0	0		0	0	0	0	0	0		0	0	0	0	0	0
1156	2019-07-09	1410.1	1410.1	1410.1	1410.1	1410.1	1410.1	1410.1		0	0	0	0	0	0	0	0	0	0	0	0		0	0	0	0	0	0		0	0	0	0	0	0		0	0	0	0	0	0
1157	2019-07-08	1397.5	1397.5	1397.5	1397.5	1397.5	1397.5	1397.5		0	0	0	0	0	0	0	0	0	0	0	0		0	0	0	0	0	0		0	0	0	0	0	0		0	0	0	0	0	0
1158	2019-07-07	1397	1397.0	1397.0	1397.0	1397.0	1397.0	1397.0		0	0	0	0	0	0	0	0	0	0	0	0		0	0	0	0	0	0		0	0	0	0	0	0		0	0	0	0	0	0
1159	2019-07-04	1396.7	1109.887	1405.611	1395.0	1400.544	1412.525	1146.369		-286.813	286.813	8.911	8.911	-1.7	1.7	3.844	3.844	15.825	15.825	-250.331	250.331		82261.7	79.4059	2.89	14.7763	250.431	62665.6		0.20535	-0.00638004	0.00121715	-0.0027522	-0.0113303	0.17923		0.20535	0.00638004	0.00121715	0.0027522	0.0113303	0.17923
1160	2019-07-03	1417.7	1417.7	1417.7	1417.7	1417.7	1417.7	1417.7		0	0	0	0	0	0	0	0	0	0	0	0		0	0	0	0	0	0		0	0	0	0	0	0		0	0	0	0	0	0
1161	2019-07-01	1404.6	1109.887	1405.611	1409.533	1412.187	1396.3	1145.465		-294.713	294.713	1.011	1.011	4.933	4.933	7.587	7.587	-8.3	8.3	-259.135	259.135		86855.8	1.02212	24.3345	57.5626	68.89	67150.9		0.20982	-0.000719778	-0.00351203	-0.00540154	0.00590916	0.18449		0.20982	0.000719778	0.00351203	0.00540154	0.00590916	0.18449
1162	2019-06-30	1385.6	1385.6	1385.6	1385.6	1385.6	1385.6	1385.6		0	0	0	0	0	0	0	0	0	0	0	0		0	0	0	0	0	0		0	0	0	0	0	0		0	0	0	0	0	0
1163	2019-06-27	1409.7	1409.7	1409.7	1409.7	1409.7	1409.7	1409.7		0	0	0	0	0	0	0	0	0	0	0	0		0	0	0	0	0	0		0	0	0	0	0	0		0	0	0	0	0	0
1164	2019-06-26	1408.4	1408.4	1408.4	1408.4	1408.4	1408.4	1408.4		0	0	0	0	0	0	0	0	0	0	0	0		0	0	0	0	0	0		0	0	0	0	0	0		0	0	0	0	0	0
1165	2019-06-25	1411.6	1411.6	1411.6	1411.6	1411.6	1411.6	1411.6		0	0	0	0	0	0	0	0	0	0	0	0		0	0	0	0	0	0		0	0	0	0	0	0		0	0	0	0	0	0
1166	2019-06-24	1414.9	1109.887	1424.456	1427.567	1424.969	1412.950	1147.759		-305.013	305.013	9.556	9.556	12.667	12.667	10.069	10.069	-1.95	1.95	-267.141	267.141		93032.9	91.3171	160.453	101.385	3.8025	71364.3		0.215572	-0.00675383	-0.00895258	-0.0071164	0.00137819	0.188806		0.215572	0.00675383	0.00895258	0.0071164	0.00137819	0.188806
1167	2019-06-23	1414.3	1414.3	1414.3	1414.3	1414.3	1414.3	1414.3		0	0	0	0	0	0	0	0	0	0	0	0		0	0	0	0	0	0		0	0	0	0	0	0		0	0	0	0	0	0
1168	2019-06-20	1396.2	1396.2	1396.2	1396.2	1396.2	1396.2	1396.2		0	0	0	0	0	0	0	0	0	0	0	0		0	0	0	0	0	0		0	0	0	0	0	0		0	0	0	0	0	0
1169	2019-06-19	1392.9	1392.9	1392.9	1392.9	1392.9	1392.9	1392.9		0	0	0	0	0	0	0	0	0	0	0	0		0	0	0	0	0	0		0	0	0	0	0	0		0	0	0	0	0	0
1170	2019-06-18	1344.6	1344.6	1344.6	1344.6	1344.6	1344.6	1344.6		0	0	0	0	0	0	0	0	0	0	0	0		0	0	0	0	0	0		0	0	0	0	0	0		0	0	0	0	0	0
1171	2019-06-17	1346.6	1346.6	1346.6	1346.6	1346.6	1346.6	1346.6		0	0	0	0	0	0	0	0	0	0	0	0		0	0	0	0	0	0		0	0	0	0	0	0		0	0	0	0	0	0
1172	2019-06-16	1338.7	1338.7	1338.7	1338.7	1338.7	1338.7	1338.7		0	0	0	0	0	0	0	0	0	0	0	0		0	0	0	0	0	0		0	0	0	0	0	0		0	0	0	0	0	0
1173	2019-06-13	1340.1	1340.1	1340.1	1340.1	1340.1	1340.1	1340.1		0	0	0	0	0	0	0	0	0	0	0	0		0	0	0	0	0	0		0	0	0	0	0	0		0	0	0	0	0	0
1174	2019-06-12	1339.2	1339.2	1339.2	1339.2	1339.2	1339.2	1339.2		0	0	0	0	0	0	0	0	0	0	0	0		0	0	0	0	0	0		0	0	0	0	0	0		0	0	0	0	0	0
1175	2019-06-11	1331.9	1331.9	1331.9	1331.9	1331.9	1331.9	1331.9		0	0	0	0	0	0	0	0	0	0	0	0		0	0	0	0	0	0		0	0	0	0	0	0		0	0	0	0	0	0
1176	2019-06-10	1326.4	1326.4	1326.4	1326.4	1326.4	1326.4	1326.4		0	0	0	0	0	0	0	0	0	0	0	0		0	0	0	0	0	0		0	0	0	0	0	0		0	0	0	0	0	0
1177	2019-06-09	1324.7	1324.7	1324.7	1324.7	1324.7	1324.7	1324.7		0	0	0	0	0	0	0	0	0	0	0	0		0	0	0	0	0	0		0	0	0	0	0	0		0	0	0	0	0	0
1178	2019-06-06	1341.2	1341.2	1341.2	1341.2	1341.2	1341.2	1341.2		0	0	0	0	0	0	0	0	0	0	0	0		0	0	0	0	0	0		0	0	0	0	0	0		0	0	0	0	0	0
1179	2019-06-05	1337.6	1337.6	1337.6	1337.6	1337.6	1337.6	1337.6		0	0	0	0	0	0	0	0	0	0	0	0		0	0	0	0	0	0		0	0	0	0	0	0		0	0	0	0	0	0
1180	2019-06-04	1328.3	1328.3	1328.3	1328.3	1328.3	1328.3	1328.3		0	0	0	0	0	0	0	0	0	0	0	0		0	0	0	0	0	0		0	0	0	0	0	0		0	0	0	0	0	0
1181	2019-06-03	1323.4	1323.4	1323.4	1323.4	1323.4	1323.4	1323.4		0	0	0	0	0	0	0	0	0	0	0	0		0	0	0	0	0	0		0	0	0	0	0	0		0	0	0	0	0	0
1182	2019-06-02	1322.7	1322.7	1322.7	1322.7	1322.7	1322.7	1322.7		0	0	0	0	0	0	0	0	0	0	0	0		0	0	0	0	0	0		0	0	0	0	0	0		0	0	0	0	0	0
1183	2019-05-30	1305.8	1305.8	1305.8	1305.8	1305.8	1305.8	1305.8		0	0	0	0	0	0	0	0	0	0	0	0		0	0	0	0	0	0		0	0	0	0	0	0		0	0	0	0	0	0
1184	2019-05-29	1287.1	1287.1	1287.1	1287.1	1287.1	1287.1	1287.1		0	0	0	0	0	0	0	0	0	0	0	0		0	0	0	0	0	0		0	0	0	0	0	0		0	0	0	0	0	0
1185	2019-05-28	1280.6	1280.6	1280.6	1280.6	1280.6	1280.6	1280.6		0	0	0	0	0	0	0	0	0	0	0	0		0	0	0	0	0	0		0	0	0	0	0	0		0	0	0	0	0	0
1186	2019-05-27	1276.5	1276.5	1276.5	1276.5	1276.5	1276.5	1276.5		0	0	0	0	0	0	0	0	0	0	0	0		0	0	0	0	0	0		0	0	0	0	0	0		0	0	0	0	0	0
1187	2019-05-23	1283	1283.0	1283.0	1283.0	1283.0	1283.0	1283.0		0	0	0	0	0	0	0	0	0	0	0	0		0	0	0	0	0	0		0	0	0	0	0	0		0	0	0	0	0	0
1188	2019-05-22	1284.8	1109.887	1283.571	1285.133	1283.891	1278.3	1135.029		-174.913	174.913	-1.229	1.229	0.333	0.333	-0.909	0.909	-6.5	6.5	-149.771	149.771		30594.6	1.51044	0.110889	0.826281	42.25	22431.4		0.13614	0.000956569	-0.000259184	0.000707503	0.00505915	0.116571		0.13614	0.000956569	0.000259184	0.000707503	0.00505915	0.116571
1189	2019-05-21	1273.6	1273.6	1273.6	1273.6	1273.6	1273.6	1273.6		0	0	0	0	0	0	0	0	0	0	0	0		0	0	0	0	0	0		0	0	0	0	0	0		0	0	0	0	0	0
1190	2019-05-20	1272	1109.887	1267.606	1272.533	1270.388	1274.850	1134.010		-162.113	162.113	-4.394	4.394	0.533	0.533	-1.612	1.612	2.85	2.85	-137.99	137.99		26280.6	19.3072	0.284089	2.59854	8.1225	19041.2		0.127447	0.0034544	-0.000419025	0.0012673	-0.00224057	0.108483		0.127447	0.0034544	0.000419025	0.0012673	0.00224057	0.108483
1191	2019-05-19	1276.1	1276.1	1276.1	1276.1	1276.1	1276.1	1276.1		0	0	0	0	0	0	0	0	0	0	0	0		0	0	0	0	0	0		0	0	0	0	0	0		0	0	0	0	0	0
1192	2019-05-16	1274.5	1274.5	1274.5	1274.5	1274.5	1274.5	1274.5		0	0	0	0	0	0	0	0	0	0	0	0		0	0	0	0	0	0		0	0	0	0	0	0		0	0	0	0	0	0
1193	2019-05-15	1285	1285.0	1285.0	1285.0	1285.0	1285.0	1285.0		0	0	0	0	0	0	0	0	0	0	0	0		0	0	0	0	0	0		0	0	0	0	0	0		0	0	0	0	0	0
1194	2019-05-14	1296.3	1109.887	1295.616	1296.267	1296.661	1289.850	1135.990		-186.413	186.413	-0.684	0.684	-0.033	0.033	0.361	0.361	-6.45	6.45	-160.31	160.31		34749.8	0.467856	0.001089	0.130321	41.6025	25699.3		0.143804	0.000527656	2.54571e-05	-0.000278485	0.0049757	0.123667		0.143804	0.000527656	2.54571e-05	0.000278485	0.0049757	0.123667
1195	2019-05-13	1294.7	1294.7	1294.7	1294.7	1294.7	1294.7	1294.7		0	0	0	0	0	0	0	0	0	0	0	0		0	0	0	0	0	0		0	0	0	0	0	0		0	0	0	0	0	0
1196	2019-05-12	1300.1	1300.1	1300.1	1300.1	1300.1	1300.1	1300.1		0	0	0	0	0	0	0	0	0	0	0	0		0	0	0	0	0	0		0	0	0	0	0	0		0	0	0	0	0	0
1197	2019-05-09	1285.7	1285.7	1285.7	1285.7	1285.7	1285.7	1285.7		0	0	0	0	0	0	0	0	0	0	0	0		0	0	0	0	0	0		0	0	0	0	0	0		0	0	0	0	0	0
1198	2019-05-08	1283.5	1283.5	1283.5	1283.5	1283.5	1283.5	1283.5		0	0	0	0	0	0	0	0	0	0	0	0		0	0	0	0	0	0		0	0	0	0	0	0		0	0	0	0	0	0
1199	2019-05-07	1279.4	1279.4	1279.4	1279.4	1279.4	1279.4	1279.4		0	0	0	0	0	0	0	0	0	0	0	0		0	0	0	0	0	0		0	0	0	0	0	0		0	0	0	0	0	0
1200	2019-05-06	1283.5	1283.5	1283.5	1283.5	1283.5	1283.5	1283.5		0	0	0	0	0	0	0	0	0	0	0	0		0	0	0	0	0	0		0	0	0	0	0	0		0	0	0	0	0	0
1201	2019-05-05	1281.7	1281.7	1281.7	1281.7	1281.7	1281.7	1281.7		0	0	0	0	0	0	0	0	0	0	0	0		0	0	0	0	0	0		0	0	0	0	0	0		0	0	0	0	0	0
1202	2019-05-02	1279.2	1279.2	1279.2	1279.2	1279.2	1279.2	1279.2		0	0	0	0	0	0	0	0	0	0	0	0		0	0	0	0	0	0		0	0	0	0	0	0		0	0	0	0	0	0
1203	2019-05-01	1269.7	1269.7	1269.7	1269.7	1269.7	1269.7	1269.7		0	0	0	0	0	0	0	0	0	0	0	0		0	0	0	0	0	0		0	0	0	0	0	0		0	0	0	0	0	0
1204	2019-04-30	1281.4	1281.4	1281.4	1281.4	1281.4	1281.4	1281.4		0	0	0	0	0	0	0	0	0	0	0	0		0	0	0	0	0	0		0	0	0	0	0	0		0	0	0	0	0	0
1205	2019-04-29	1282.8	1109.887	1283.571	1282.367	1282.498	1280.0	1134.799		-172.913	172.913	0.771	0.771	-0.433	0.433	-0.302	0.302	-2.8	2.8	-148.001	148.001		29898.9	0.594441	0.187489	0.091204	7.84	21904.3		0.134793	-0.000601029	0.000337543	0.000235423	0.00218273	0.115373		0.134793	0.000601029	0.000337543	0.000235423	0.00218273	0.115373
1206	2019-04-28	1278.6	1278.6	1278.6	1278.6	1278.6	1278.6	1278.6		0	0	0	0	0	0	0	0	0	0	0	0		0	0	0	0	0	0		0	0	0	0	0	0		0	0	0	0	0	0
1207	2019-04-25	1284.9	1109.887	1283.571	1285.133	1283.891	1276.5	1135.037		-175.013	175.013	-1.329	1.329	0.233	0.233	-1.009	1.009	-8.4	8.4	-149.863	149.863		30629.6	1.76624	0.054289	1.01808	70.56	22458.9		0.136207	0.00103432	-0.000181337	0.000785275	0.00653747	0.116634		0.136207	0.00103432	0.000181337	0.000785275	0.00653747	0.116634
1208	2019-04-24	1275.8	1275.8	1275.8	1275.8	1275.8	1275.8	1275.8		0	0	0	0	0	0	0	0	0	0	0	0		0	0	0	0	0	0		0	0	0	0	0	0		0	0	0	0	0	0
1209	2019-04-23	1275.5	1275.5	1275.5	1275.5	1275.5	1275.5	1275.5		0	0	0	0	0	0	0	0	0	0	0	0		0	0	0	0	0	0		0	0	0	0	0	0		0	0	0	0	0	0
1210	2019-04-22	1269.3	1269.3	1269.3	1269.3	1269.3	1269.3	1269.3		0	0	0	0	0	0	0	0	0	0	0	0		0	0	0	0	0	0		0	0	0	0	0	0		0	0	0	0	0	0
1211	2019-04-21	1273.5	1273.5	1273.5	1273.5	1273.5	1273.5	1273.5		0	0	0	0	0	0	0	0	0	0	0	0		0	0	0	0	0	0		0	0	0	0	0	0		0	0	0	0	0	0
1212	2019-04-17	1271.9	1271.9	1271.9	1271.9	1271.9	1271.9	1271.9		0	0	0	0	0	0	0	0	0	0	0	0		0	0	0	0	0	0		0	0	0	0	0	0		0	0	0	0	0	0
1213	2019-04-16	1272.2	1272.2	1272.2	1272.2	1272.2	1272.2	1272.2		0	0	0	0	0	0	0	0	0	0	0	0		0	0	0	0	0	0		0	0	0	0	0	0		0	0	0	0	0	0
1214	2019-04-15	1272.6	1109.887	1275.040	1272.0	1273.421	1279.5	1134.711		-162.713	162.713	2.44	2.44	-0.6	0.6	0.821	0.821	6.9	6.9	-137.889	137.889		26475.5	5.9536	0.36	0.674041	47.61	19013.4		0.127859	-0.00191733	0.000471476	-0.000645136	-0.00542197	0.108352		0.127859	0.00191733	0.000471476	0.000645136	0.00542197	0.108352
1215	2019-04-14	1286.8	1286.8	1286.8	1286.8	1286.8	1286.8	1286.8		0	0	0	0	0	0	0	0	0	0	0	0		0	0	0	0	0	0		0	0	0	0	0	0		0	0	0	0	0	0
1216	2019-04-11	1290.6	1290.6	1290.6	1290.6	1290.6	1290.6	1290.6		0	0	0	0	0	0	0	0	0	0	0	0		0	0	0	0	0	0		0	0	0	0	0	0		0	0	0	0	0	0
1217	2019-04-10	1288.6	1288.6	1288.6	1288.6	1288.6	1288.6	1288.6		0	0	0	0	0	0	0	0	0	0	0	0		0	0	0	0	0	0		0	0	0	0	0	0		0	0	0	0	0	0
1218	2019-04-09	1309.1	1309.1	1309.1	1309.1	1309.1	1309.1	1309.1		0	0	0	0	0	0	0	0	0	0	0	0		0	0	0	0	0	0		0	0	0	0	0	0		0	0	0	0	0	0
1219	2019-04-08	1303.5	1303.5	1303.5	1303.5	1303.5	1303.5	1303.5		0	0	0	0	0	0	0	0	0	0	0	0		0	0	0	0	0	0		0	0	0	0	0	0		0	0	0	0	0	0
1220	2019-04-07	1297.1	1297.1	1297.1	1297.1	1297.1	1297.1	1297.1		0	0	0	0	0	0	0	0	0	0	0	0		0	0	0	0	0	0		0	0	0	0	0	0		0	0	0	0	0	0
1221	2019-04-04	1290.4	1290.4	1290.4	1290.4	1290.4	1290.4	1290.4		0	0	0	0	0	0	0	0	0	0	0	0		0	0	0	0	0	0		0	0	0	0	0	0		0	0	0	0	0	0
1222	2019-04-03	1289	1289.0	1289.0	1289.0	1289.0	1289.0	1289.0		0	0	0	0	0	0	0	0	0	0	0	0		0	0	0	0	0	0		0	0	0	0	0	0		0	0	0	0	0	0
1223	2019-04-02	1289.9	1289.9	1289.9	1289.9	1289.9	1289.9	1289.9		0	0	0	0	0	0	0	0	0	0	0	0		0	0	0	0	0	0		0	0	0	0	0	0		0	0	0	0	0	0
1224	2019-04-01	1290	1290.0	1290.0	1290.0	1290.0	1290.0	1290.0		0	0	0	0	0	0	0	0	0	0	0	0		0	0	0	0	0	0		0	0	0	0	0	0		0	0	0	0	0	0
1225	2019-03-31	1288.4	1288.4	1288.4	1288.4	1288.4	1288.4	1288.4		0	0	0	0	0	0	0	0	0	0	0	0		0	0	0	0	0	0		0	0	0	0	0	0		0	0	0	0	0	0
1226	2019-03-28	1293	1293.0	1293.0	1293.0	1293.0	1293.0	1293.0		0	0	0	0	0	0	0	0	0	0	0	0		0	0	0	0	0	0		0	0	0	0	0	0		0	0	0	0	0	0
1227	2019-03-27	1289.8	1289.8	1289.8	1289.8	1289.8	1289.8	1289.8		0	0	0	0	0	0	0	0	0	0	0	0		0	0	0	0	0	0		0	0	0	0	0	0		0	0	0	0	0	0
1228	2019-03-26	1309.9	1309.9	1309.9	1309.9	1309.9	1309.9	1309.9		0	0	0	0	0	0	0	0	0	0	0	0		0	0	0	0	0	0		0	0	0	0	0	0		0	0	0	0	0	0
1229	2019-03-25	1314.3	1314.3	1314.3	1314.3	1314.3	1314.3	1314.3		0	0	0	0	0	0	0	0	0	0	0	0		0	0	0	0	0	0		0	0	0	0	0	0		0	0	0	0	0	0
1230	2019-03-24	1321.9	1109.887	1323.5	1320.433	1321.283	1313.625	1138.085		-212.013	212.013	1.6	1.6	-1.467	1.467	-0.617	0.617	-8.275	8.275	-183.815	183.815		44949.5	2.56	2.15209	0.380689	68.4756	33788		0.160385	-0.00121038	0.00110977	0.000466752	0.00625993	0.139054		0.160385	0.00121038	0.00110977	0.000466752	0.00625993	0.139054
1231	2019-03-21	1311.6	1311.6	1311.6	1311.6	1311.6	1311.6	1311.6		0	0	0	0	0	0	0	0	0	0	0	0		0	0	0	0	0	0		0	0	0	0	0	0		0	0	0	0	0	0
1232	2019-03-20	1306.1	1306.1	1306.1	1306.1	1306.1	1306.1	1306.1		0	0	0	0	0	0	0	0	0	0	0	0		0	0	0	0	0	0		0	0	0	0	0	0		0	0	0	0	0	0
1233	2019-03-19	1300.5	1300.5	1300.5	1300.5	1300.5	1300.5	1300.5		0	0	0	0	0	0	0	0	0	0	0	0		0	0	0	0	0	0		0	0	0	0	0	0		0	0	0	0	0	0
1234	2019-03-18	1305	1305.0	1305.0	1305.0	1305.0	1305.0	1305.0		0	0	0	0	0	0	0	0	0	0	0	0		0	0	0	0	0	0		0	0	0	0	0	0		0	0	0	0	0	0
1235	2019-03-17	1300.3	1300.3	1300.3	1300.3	1300.3	1300.3	1300.3		0	0	0	0	0	0	0	0	0	0	0	0		0	0	0	0	0	0		0	0	0	0	0	0		0	0	0	0	0	0
1236	2019-03-14	1301.8	1301.8	1301.8	1301.8	1301.8	1301.8	1301.8		0	0	0	0	0	0	0	0	0	0	0	0		0	0	0	0	0	0		0	0	0	0	0	0		0	0	0	0	0	0
1237	2019-03-13	1293.4	1293.4	1293.4	1293.4	1293.4	1293.4	1293.4		0	0	0	0	0	0	0	0	0	0	0	0		0	0	0	0	0	0		0	0	0	0	0	0		0	0	0	0	0	0
1238	2019-03-12	1307.5	1307.5	1307.5	1307.5	1307.5	1307.5	1307.5		0	0	0	0	0	0	0	0	0	0	0	0		0	0	0	0	0	0		0	0	0	0	0	0		0	0	0	0	0	0
1239	2019-03-11	1296.3	1109.887	1295.616	1294.667	1295.599	1298.150	1135.877		-186.413	186.413	-0.684	0.684	-1.633	1.633	-0.701	0.701	1.85	1.85	-160.423	160.423		34749.8	0.467856	2.66669	0.491401	3.4225	25735.5		0.143804	0.000527656	0.00125974	0.00054077	-0.00142714	0.123755		0.143804	0.000527656	0.00125974	0.00054077	0.00142714	0.123755
1240	2019-03-10	1288.8	1288.8	1288.8	1288.8	1288.8	1288.8	1288.8		0	0	0	0	0	0	0	0	0	0	0	0		0	0	0	0	0	0		0	0	0	0	0	0		0	0	0	0	0	0
1241	2019-03-08	1297	1297.0	1297.0	1297.0	1297.0	1297.0	1297.0		0	0	0	0	0	0	0	0	0	0	0	0		0	0	0	0	0	0		0	0	0	0	0	0		0	0	0	0	0	0
1242	2019-03-07	1283.8	1283.8	1283.8	1283.8	1283.8	1283.8	1283.8		0	0	0	0	0	0	0	0	0	0	0	0		0	0	0	0	0	0		0	0	0	0	0	0		0	0	0	0	0	0
1243	2019-03-06	1284.9	1284.9	1284.9	1284.9	1284.9	1284.9	1284.9		0	0	0	0	0	0	0	0	0	0	0	0		0	0	0	0	0	0		0	0	0	0	0	0		0	0	0	0	0	0
1244	2019-03-05	1282	1282.0	1282.0	1282.0	1282.0	1282.0	1282.0		0	0	0	0	0	0	0	0	0	0	0	0		0	0	0	0	0	0		0	0	0	0	0	0		0	0	0	0	0	0
1245	2019-03-04	1284.8	1284.8	1284.8	1284.8	1284.8	1284.8	1284.8		0	0	0	0	0	0	0	0	0	0	0	0		0	0	0	0	0	0		0	0	0	0	0	0		0	0	0	0	0	0
1246	2019-03-01	1296.4	1296.4	1296.4	1296.4	1296.4	1296.4	1296.4		0	0	0	0	0	0	0	0	0	0	0	0		0	0	0	0	0	0		0	0	0	0	0	0		0	0	0	0	0	0
1247	2019-02-28	1312.8	1109.887	1319.214	1314.067	1316.272	1307.050	1137.854		-202.913	202.913	6.414	6.414	1.267	1.267	3.472	3.472	-5.75	5.75	-174.946	174.946		41173.7	41.1394	1.60529	12.0548	33.0625	30606.1		0.154565	-0.00488574	-0.000965113	-0.00264473	0.00437995	0.133262		0.154565	0.00488574	0.000965113	0.00264473	0.00437995	0.133262
1248	2019-02-27	1317.7	1317.7	1317.7	1317.7	1317.7	1317.7	1317.7		0	0	0	0	0	0	0	0	0	0	0	0		0	0	0	0	0	0		0	0	0	0	0	0		0	0	0	0	0	0
1249	2019-02-26	1325.1	1325.1	1325.1	1325.1	1325.1	1325.1	1325.1		0	0	0	0	0	0	0	0	0	0	0	0		0	0	0	0	0	0		0	0	0	0	0	0		0	0	0	0	0	0
1250	2019-02-25	1325.9	1325.9	1325.9	1325.9	1325.9	1325.9	1325.9		0	0	0	0	0	0	0	0	0	0	0	0		0	0	0	0	0	0		0	0	0	0	0	0		0	0	0	0	0	0
1251	2019-02-22	1329.2	1329.2	1329.2	1329.2	1329.2	1329.2	1329.2		0	0	0	0	0	0	0	0	0	0	0	0		0	0	0	0	0	0		0	0	0	0	0	0		0	0	0	0	0	0
1252	2019-02-21	1323.5	1109.887	1331.700	1323.1	1325.468	1336.250	1138.746		-213.613	213.613	8.2	8.2	-0.4	0.4	1.968	1.968	12.75	12.75	-184.754	184.754		45630.5	67.24	0.16	3.87302	162.562	34134		0.1614	-0.00619569	0.000302229	-0.00148697	-0.00963355	0.139595		0.1614	0.00619569	0.000302229	0.00148697	0.00963355	0.139595
1253	2019-02-20	1343.3	1343.3	1343.3	1343.3	1343.3	1343.3	1343.3		0	0	0	0	0	0	0	0	0	0	0	0		0	0	0	0	0	0		0	0	0	0	0	0		0	0	0	0	0	0
1254	2019-02-19	1340.1	1340.1	1340.1	1340.1	1340.1	1340.1	1340.1		0	0	0	0	0	0	0	0	0	0	0	0		0	0	0	0	0	0		0	0	0	0	0	0		0	0	0	0	0	0
1255	2019-02-15	1318.1	1109.887	1319.214	1319.833	1316.886	1315.860	1137.561		-208.213	208.213	1.114	1.114	1.733	1.733	-1.214	1.214	-2.24	2.24	-180.539	180.539		43352.7	1.241	3.00329	1.4738	5.0176	32594.3		0.157964	-0.000845156	-0.00131477	0.000921023	0.00169942	0.136969		0.157964	0.000845156	0.00131477	0.000921023	0.00169942	0.136969
1256	2019-02-14	1309.8	1309.8	1309.8	1309.8	1309.8	1309.8	1309.8		0	0	0	0	0	0	0	0	0	0	0	0		0	0	0	0	0	0		0	0	0	0	0	0		0	0	0	0	0	0
1257	2019-02-13	1310.8	1109.887	1314.264	1313.233	1311.191	1308.867	1137.268		-200.913	200.913	3.464	3.464	2.433	2.433	0.391	0.391	-1.933	1.933	-173.532	173.532		40366	11.9993	5.91949	0.152881	3.73649	30113.4		0.153275	-0.00264266	-0.00185612	-0.000298291	0.00147467	0.132386		0.153275	0.00264266	0.00185612	0.000298291	0.00147467	0.132386
1258	2019-02-12	1309.2	1109.887	1310.370	1310.567	1310.319	1307.933	1137.096		-199.313	199.313	1.17	1.17	1.367	1.367	1.119	1.119	-1.267	1.267	-172.104	172.104		39725.7	1.3689	1.86869	1.25216	1.60529	29619.8		0.15224	-0.000893676	-0.00104415	-0.00085472	0.000967767	0.131457		0.15224	0.000893676	0.00104415	0.00085472	0.000967767	0.131457
1259	2019-02-11	1307	1307.0	1307.0	1307.0	1307.0	1307.0	1307.0		0	0	0	0	0	0	0	0	0	0	0	0		0	0	0	0	0	0		0	0	0	0	0	0		0	0	0	0	0	0
1260	2019-02-08	1313.7	1313.7	1313.7	1313.7	1313.7	1313.7	1313.7		0	0	0	0	0	0	0	0	0	0	0	0		0	0	0	0	0	0		0	0	0	0	0	0		0	0	0	0	0	0
1261	2019-02-07	1309.4	1309.4	1309.4	1309.4	1309.4	1309.4	1309.4		0	0	0	0	0	0	0	0	0	0	0	0		0	0	0	0	0	0		0	0	0	0	0	0		0	0	0	0	0	0
1262	2019-02-06	1309.5	1309.5	1309.5	1309.5	1309.5	1309.5	1309.5		0	0	0	0	0	0	0	0	0	0	0	0		0	0	0	0	0	0		0	0	0	0	0	0		0	0	0	0	0	0
1263	2019-02-05	1314.2	1314.2	1314.2	1314.2	1314.2	1314.2	1314.2		0	0	0	0	0	0	0	0	0	0	0	0		0	0	0	0	0	0		0	0	0	0	0	0		0	0	0	0	0	0
1264	2019-02-04	1314.3	1314.3	1314.3	1314.3	1314.3	1314.3	1314.3		0	0	0	0	0	0	0	0	0	0	0	0		0	0	0	0	0	0		0	0	0	0	0	0		0	0	0	0	0	0
1265	2019-02-01	1316.9	1316.9	1316.9	1316.9	1316.9	1316.9	1316.9		0	0	0	0	0	0	0	0	0	0	0	0		0	0	0	0	0	0		0	0	0	0	0	0		0	0	0	0	0	0
1266	2019-01-31	1319.7	1319.7	1319.7	1319.7	1319.7	1319.7	1319.7		0	0	0	0	0	0	0	0	0	0	0	0		0	0	0	0	0	0		0	0	0	0	0	0		0	0	0	0	0	0
1267	2019-01-30	1309.9	1309.9	1309.9	1309.9	1309.9	1309.9	1309.9		0	0	0	0	0	0	0	0	0	0	0	0		0	0	0	0	0	0		0	0	0	0	0	0		0	0	0	0	0	0
1268	2019-01-29	1308.2	1308.2	1308.2	1308.2	1308.2	1308.2	1308.2		0	0	0	0	0	0	0	0	0	0	0	0		0	0	0	0	0	0		0	0	0	0	0	0		0	0	0	0	0	0
1269	2019-01-28	1302.4	1302.4	1302.4	1302.4	1302.4	1302.4	1302.4		0	0	0	0	0	0	0	0	0	0	0	0		0	0	0	0	0	0		0	0	0	0	0	0		0	0	0	0	0	0
1270	2019-01-25	1297.4	1297.4	1297.4	1297.4	1297.4	1297.4	1297.4		0	0	0	0	0	0	0	0	0	0	0	0		0	0	0	0	0	0		0	0	0	0	0	0		0	0	0	0	0	0
1271	2019-01-24	1279.1	1279.1	1279.1	1279.1	1279.1	1279.1	1279.1		0	0	0	0	0	0	0	0	0	0	0	0		0	0	0	0	0	0		0	0	0	0	0	0		0	0	0	0	0	0
1272	2019-01-23	1283.1	1283.1	1283.1	1283.1	1283.1	1283.1	1283.1		0	0	0	0	0	0	0	0	0	0	0	0		0	0	0	0	0	0		0	0	0	0	0	0		0	0	0	0	0	0
1273	2019-01-22	1282.5	1282.5	1282.5	1282.5	1282.5	1282.5	1282.5		0	0	0	0	0	0	0	0	0	0	0	0		0	0	0	0	0	0		0	0	0	0	0	0		0	0	0	0	0	0
1274	2019-01-18	1281.3	1281.3	1281.3	1281.3	1281.3	1281.3	1281.3		0	0	0	0	0	0	0	0	0	0	0	0		0	0	0	0	0	0		0	0	0	0	0	0		0	0	0	0	0	0
1275	2019-01-17	1291	1291.0	1291.0	1291.0	1291.0	1291.0	1291.0		0	0	0	0	0	0	0	0	0	0	0	0		0	0	0	0	0	0		0	0	0	0	0	0		0	0	0	0	0	0
1276	2019-01-16	1291.6	1291.6	1291.6	1291.6	1291.6	1291.6	1291.6		0	0	0	0	0	0	0	0	0	0	0	0		0	0	0	0	0	0		0	0	0	0	0	0		0	0	0	0	0	0
1277	2019-01-15	1286.2	1286.2	1286.2	1286.2	1286.2	1286.2	1286.2		0	0	0	0	0	0	0	0	0	0	0	0		0	0	0	0	0	0		0	0	0	0	0	0		0	0	0	0	0	0
1278	2019-01-14	1289.1	1109.887	1291.150	1292.4	1291.376	1286.425	1135.596		-179.213	179.213	2.05	2.05	3.3	3.3	2.276	2.276	-2.675	2.675	-153.504	153.504		32117.3	4.2025	10.89	5.18018	7.15562	23563.5		0.139022	-0.00159026	-0.00255993	-0.00176557	0.00207509	0.119078		0.139022	0.00159026	0.00255993	0.00176557	0.00207509	0.119078
1279	2019-01-11	1287.1	1287.1	1287.1	1287.1	1287.1	1287.1	1287.1		0	0	0	0	0	0	0	0	0	0	0	0		0	0	0	0	0	0		0	0	0	0	0	0		0	0	0	0	0	0
1280	2019-01-10	1284.7	1284.7	1284.7	1284.7	1284.7	1284.7	1284.7		0	0	0	0	0	0	0	0	0	0	0	0		0	0	0	0	0	0		0	0	0	0	0	0		0	0	0	0	0	0
1281	2019-01-09	1289.3	1289.3	1289.3	1289.3	1289.3	1289.3	1289.3		0	0	0	0	0	0	0	0	0	0	0	0		0	0	0	0	0	0		0	0	0	0	0	0		0	0	0	0	0	0
1282	2019-01-08	1283.2	1283.2	1283.2	1283.2	1283.2	1283.2	1283.2		0	0	0	0	0	0	0	0	0	0	0	0		0	0	0	0	0	0		0	0	0	0	0	0		0	0	0	0	0	0
1283	2019-01-07	1286.8	1286.8	1286.8	1286.8	1286.8	1286.8	1286.8		0	0	0	0	0	0	0	0	0	0	0	0		0	0	0	0	0	0		0	0	0	0	0	0		0	0	0	0	0	0
1284	2019-01-04	1282.7	1282.7	1282.7	1282.7	1282.7	1282.7	1282.7		0	0	0	0	0	0	0	0	0	0	0	0		0	0	0	0	0	0		0	0	0	0	0	0		0	0	0	0	0	0
1285	2019-01-03	1291.8	1291.8	1291.8	1291.8	1291.8	1291.8	1291.8		0	0	0	0	0	0	0	0	0	0	0	0		0	0	0	0	0	0		0	0	0	0	0	0		0	0	0	0	0	0
1286	2019-01-02	1281	1281.0	1281.0	1281.0	1281.0	1281.0	1281.0		0	0	0	0	0	0	0	0	0	0	0	0		0	0	0	0	0	0		0	0	0	0	0	0		0	0	0	0	0	0
1287	2018-12-31	1278.3	1278.3	1278.3	1278.3	1278.3	1278.3	1278.3		0	0	0	0	0	0	0	0	0	0	0	0		0	0	0	0	0	0		0	0	0	0	0	0		0	0	0	0	0	0
1288	2018-12-28	1279.9	1279.9	1279.9	1279.9	1279.9	1279.9	1279.9		0	0	0	0	0	0	0	0	0	0	0	0		0	0	0	0	0	0		0	0	0	0	0	0		0	0	0	0	0	0
1289	2018-12-27	1277.3	1277.3	1277.3	1277.3	1277.3	1277.3	1277.3		0	0	0	0	0	0	0	0	0	0	0	0		0	0	0	0	0	0		0	0	0	0	0	0		0	0	0	0	0	0
1290	2018-12-26	1269.2	1269.2	1269.2	1269.2	1269.2	1269.2	1269.2		0	0	0	0	0	0	0	0	0	0	0	0		0	0	0	0	0	0		0	0	0	0	0	0		0	0	0	0	0	0
1291	2018-12-24	1267.5	1267.5	1267.5	1267.5	1267.5	1267.5	1267.5		0	0	0	0	0	0	0	0	0	0	0	0		0	0	0	0	0	0		0	0	0	0	0	0		0	0	0	0	0	0
1292	2018-12-21	1253.8	1253.8	1253.8	1253.8	1253.8	1253.8	1253.8		0	0	0	0	0	0	0	0	0	0	0	0		0	0	0	0	0	0		0	0	0	0	0	0		0	0	0	0	0	0
1293	2018-12-20	1263.6	1263.6	1263.6	1263.6	1263.6	1263.6	1263.6		0	0	0	0	0	0	0	0	0	0	0	0		0	0	0	0	0	0		0	0	0	0	0	0		0	0	0	0	0	0
1294	2018-12-19	1252.1	1252.1	1252.1	1252.1	1252.1	1252.1	1252.1		0	0	0	0	0	0	0	0	0	0	0	0		0	0	0	0	0	0		0	0	0	0	0	0		0	0	0	0	0	0
1295	2018-12-18	1249.2	1109.887	1247.982	1248.133	1248.891	1249.750	1132.134		-139.313	139.313	-1.218	1.218	-1.067	1.067	-0.309	0.309	0.55	0.55	-117.066	117.066		19408.1	1.48352	1.13849	0.095481	0.3025	13704.4		0.111522	0.000975024	0.000854147	0.000247358	-0.000440282	0.0937128		0.111522	0.000975024	0.000854147	0.000247358	0.000440282	0.0937128
1296	2018-12-17	1247.4	1247.4	1247.4	1247.4	1247.4	1247.4	1247.4		0	0	0	0	0	0	0	0	0	0	0	0		0	0	0	0	0	0		0	0	0	0	0	0		0	0	0	0	0	0
1297	2018-12-14	1237	1237.0	1237.0	1237.0	1237.0	1237.0	1237.0		0	0	0	0	0	0	0	0	0	0	0	0		0	0	0	0	0	0		0	0	0	0	0	0		0	0	0	0	0	0
1298	2018-12-13	1242.7	1242.7	1242.7	1242.7	1242.7	1242.7	1242.7		0	0	0	0	0	0	0	0	0	0	0	0		0	0	0	0	0	0		0	0	0	0	0	0		0	0	0	0	0	0
1299	2018-12-12	1244.4	1244.4	1244.4	1244.4	1244.4	1244.4	1244.4		0	0	0	0	0	0	0	0	0	0	0	0		0	0	0	0	0	0		0	0	0	0	0	0		0	0	0	0	0	0
1300	2018-12-11	1241.9	1241.9	1241.9	1241.9	1241.9	1241.9	1241.9		0	0	0	0	0	0	0	0	0	0	0	0		0	0	0	0	0	0		0	0	0	0	0	0		0	0	0	0	0	0
1301	2018-12-10	1243.7	1243.7	1243.7	1243.7	1243.7	1243.7	1243.7		0	0	0	0	0	0	0	0	0	0	0	0		0	0	0	0	0	0		0	0	0	0	0	0		0	0	0	0	0	0
1302	2018-12-07	1246.8	1246.8	1246.8	1246.8	1246.8	1246.8	1246.8		0	0	0	0	0	0	0	0	0	0	0	0		0	0	0	0	0	0		0	0	0	0	0	0		0	0	0	0	0	0
1303	2018-12-06	1238.1	1238.1	1238.1	1238.1	1238.1	1238.1	1238.1		0	0	0	0	0	0	0	0	0	0	0	0		0	0	0	0	0	0		0	0	0	0	0	0		0	0	0	0	0	0
1304	2018-12-04	1241.1	1241.1	1241.1	1241.1	1241.1	1241.1	1241.1		0	0	0	0	0	0	0	0	0	0	0	0		0	0	0	0	0	0		0	0	0	0	0	0		0	0	0	0	0	0
1305	2018-12-03	1233.9	1233.9	1233.9	1233.9	1233.9	1233.9	1233.9		0	0	0	0	0	0	0	0	0	0	0	0		0	0	0	0	0	0		0	0	0	0	0	0		0	0	0	0	0	0
1306	2018-11-30	1220.2	1109.887	1222.306	1220.2	1220.230	1226.550	1130.208		-110.313	110.313	2.106	2.106	0	0	0.03	0.03	6.35	6.35	-89.992	89.992		12169	4.43524	0	0.0009	40.3225	8098.56		0.0904057	-0.00172595	0	-2.45861e-05	-0.00520406	0.0737518		0.0904057	0.00172595	0	2.45861e-05	0.00520406	0.0737518
1307	2018-11-29	1224.1	1224.1	1224.1	1224.1	1224.1	1224.1	1224.1		0	0	0	0	0	0	0	0	0	0	0	0		0	0	0	0	0	0		0	0	0	0	0	0		0	0	0	0	0	0
1308	2018-11-28	1221.4	1221.4	1221.4	1221.4	1221.4	1221.4	1221.4		0	0	0	0	0	0	0	0	0	0	0	0		0	0	0	0	0	0		0	0	0	0	0	0		0	0	0	0	0	0
1309	2018-11-27	1211.2	1211.2	1211.2	1211.2	1211.2	1211.2	1211.2		0	0	0	0	0	0	0	0	0	0	0	0		0	0	0	0	0	0		0	0	0	0	0	0		0	0	0	0	0	0
1310	2018-11-26	1220.2	1220.2	1220.2	1220.2	1220.2	1220.2	1220.2		0	0	0	0	0	0	0	0	0	0	0	0		0	0	0	0	0	0		0	0	0	0	0	0		0	0	0	0	0	0
1311	2018-11-23	1221	1221.0	1221.0	1221.0	1221.0	1221.0	1221.0		0	0	0	0	0	0	0	0	0	0	0	0		0	0	0	0	0	0		0	0	0	0	0	0		0	0	0	0	0	0
1312	2018-11-21	1225.8	1225.8	1225.8	1225.8	1225.8	1225.8	1225.8		0	0	0	0	0	0	0	0	0	0	0	0		0	0	0	0	0	0		0	0	0	0	0	0		0	0	0	0	0	0
1313	2018-11-20	1219	1219.0	1219.0	1219.0	1219.0	1219.0	1219.0		0	0	0	0	0	0	0	0	0	0	0	0		0	0	0	0	0	0		0	0	0	0	0	0		0	0	0	0	0	0
1314	2018-11-19	1223.1	1223.1	1223.1	1223.1	1223.1	1223.1	1223.1		0	0	0	0	0	0	0	0	0	0	0	0		0	0	0	0	0	0		0	0	0	0	0	0		0	0	0	0	0	0
1315	2018-11-16	1220.8	1220.8	1220.8	1220.8	1220.8	1220.8	1220.8		0	0	0	0	0	0	0	0	0	0	0	0		0	0	0	0	0	0		0	0	0	0	0	0		0	0	0	0	0	0
1316	2018-11-15	1212.8	1212.8	1212.8	1212.8	1212.8	1212.8	1212.8		0	0	0	0	0	0	0	0	0	0	0	0		0	0	0	0	0	0		0	0	0	0	0	0		0	0	0	0	0	0
1317	2018-11-14	1207.9	1207.9	1207.9	1207.9	1207.9	1207.9	1207.9		0	0	0	0	0	0	0	0	0	0	0	0		0	0	0	0	0	0		0	0	0	0	0	0		0	0	0	0	0	0
1318	2018-11-13	1199.2	1109.887	1198.756	1198.8	1198.964	1204.6	1128.498		-89.313	89.313	-0.444	0.444	-0.4	0.4	-0.236	0.236	5.4	5.4	-70.702	70.702		7976.81	0.197136	0.16	0.055696	29.16	4998.77		0.0744772	0.000370247	0.000333556	0.000196798	-0.004503	0.0589576		0.0744772	0.000370247	0.000333556	0.000196798	0.004503	0.0589576
1319	2018-11-12	1201.3	1201.3	1201.3	1201.3	1201.3	1201.3	1201.3		0	0	0	0	0	0	0	0	0	0	0	0		0	0	0	0	0	0		0	0	0	0	0	0		0	0	0	0	0	0
1320	2018-11-09	1206.4	1206.4	1206.4	1206.4	1206.4	1206.4	1206.4		0	0	0	0	0	0	0	0	0	0	0	0		0	0	0	0	0	0		0	0	0	0	0	0		0	0	0	0	0	0
1321	2018-11-08	1222.9	1222.9	1222.9	1222.9	1222.9	1222.9	1222.9		0	0	0	0	0	0	0	0	0	0	0	0		0	0	0	0	0	0		0	0	0	0	0	0		0	0	0	0	0	0
1322	2018-11-07	1226.2	1226.2	1226.2	1226.2	1226.2	1226.2	1226.2		0	0	0	0	0	0	0	0	0	0	0	0		0	0	0	0	0	0		0	0	0	0	0	0		0	0	0	0	0	0
1323	2018-11-06	1223.8	1223.8	1223.8	1223.8	1223.8	1223.8	1223.8		0	0	0	0	0	0	0	0	0	0	0	0		0	0	0	0	0	0		0	0	0	0	0	0		0	0	0	0	0	0
1324	2018-11-05	1229.8	1229.8	1229.8	1229.8	1229.8	1229.8	1229.8		0	0	0	0	0	0	0	0	0	0	0	0		0	0	0	0	0	0		0	0	0	0	0	0		0	0	0	0	0	0
1325	2018-11-01	1230.9	1230.9	1230.9	1230.9	1230.9	1230.9	1230.9		0	0	0	0	0	0	0	0	0	0	0	0		0	0	0	0	0	0		0	0	0	0	0	0		0	0	0	0	0	0
1326	2018-10-31	1236	1236.0	1236.0	1236.0	1236.0	1236.0	1236.0		0	0	0	0	0	0	0	0	0	0	0	0		0	0	0	0	0	0		0	0	0	0	0	0		0	0	0	0	0	0
1327	2018-10-30	1212.3	1212.3	1212.3	1212.3	1212.3	1212.3	1212.3		0	0	0	0	0	0	0	0	0	0	0	0		0	0	0	0	0	0		0	0	0	0	0	0		0	0	0	0	0	0
1328	2018-10-29	1222.6	1222.6	1222.6	1222.6	1222.6	1222.6	1222.6		0	0	0	0	0	0	0	0	0	0	0	0		0	0	0	0	0	0		0	0	0	0	0	0		0	0	0	0	0	0
1329	2018-10-28	1224.5	1224.5	1224.5	1224.5	1224.5	1224.5	1224.5		0	0	0	0	0	0	0	0	0	0	0	0		0	0	0	0	0	0		0	0	0	0	0	0		0	0	0	0	0	0
1330	2018-10-26	1232.5	1232.5	1232.5	1232.5	1232.5	1232.5	1232.5		0	0	0	0	0	0	0	0	0	0	0	0		0	0	0	0	0	0		0	0	0	0	0	0		0	0	0	0	0	0
1331	2018-10-24	1229.1	1229.1	1229.1	1229.1	1229.1	1229.1	1229.1		0	0	0	0	0	0	0	0	0	0	0	0		0	0	0	0	0	0		0	0	0	0	0	0		0	0	0	0	0	0
1332	2018-10-23	1227.8	1227.8	1227.8	1227.8	1227.8	1227.8	1227.8		0	0	0	0	0	0	0	0	0	0	0	0		0	0	0	0	0	0		0	0	0	0	0	0		0	0	0	0	0	0
1333	2018-10-22	1233.4	1109.887	1230.273	1234.333	1233.316	1224.5	1130.750		-123.513	123.513	-3.127	3.127	0.933	0.933	-0.084	0.084	-8.9	8.9	-102.65	102.65		15255.5	9.77813	0.870489	0.007056	79.21	10537		0.10014	0.00253527	-0.000756446	6.81044e-05	0.00721583	0.0832252		0.10014	0.00253527	0.000756446	6.81044e-05	0.00721583	0.0832252
1334	2018-10-21	1221.2	1221.2	1221.2	1221.2	1221.2	1221.2	1221.2		0	0	0	0	0	0	0	0	0	0	0	0		0	0	0	0	0	0		0	0	0	0	0	0		0	0	0	0	0	0
1335	2018-10-18	1225.3	1225.3	1225.3	1225.3	1225.3	1225.3	1225.3		0	0	0	0	0	0	0	0	0	0	0	0		0	0	0	0	0	0		0	0	0	0	0	0		0	0	0	0	0	0
1336	2018-10-17	1226.5	1226.5	1226.5	1226.5	1226.5	1226.5	1226.5		0	0	0	0	0	0	0	0	0	0	0	0		0	0	0	0	0	0		0	0	0	0	0	0		0	0	0	0	0	0
1337	2018-10-16	1223.7	1109.887	1225.010	1226.067	1225.054	1226.9	1130.460		-113.813	113.813	1.31	1.31	2.367	2.367	1.354	1.354	3.2	3.2	-93.24	93.24		12953.4	1.7161	5.60269	1.83332	10.24	8693.7		0.0930073	-0.00107052	-0.0019343	-0.00110648	-0.00261502	0.0761951		0.0930073	0.00107052	0.0019343	0.00110648	0.00261502	0.0761951
1338	2018-10-15	1227.3	1227.3	1227.3	1227.3	1227.3	1227.3	1227.3		0	0	0	0	0	0	0	0	0	0	0	0		0	0	0	0	0	0		0	0	0	0	0	0		0	0	0	0	0	0
1339	2018-10-14	1226.4	1226.4	1226.4	1226.4	1226.4	1226.4	1226.4		0	0	0	0	0	0	0	0	0	0	0	0		0	0	0	0	0	0		0	0	0	0	0	0		0	0	0	0	0	0
1340	2018-10-11	1218.1	1218.1	1218.1	1218.1	1218.1	1218.1	1218.1		0	0	0	0	0	0	0	0	0	0	0	0		0	0	0	0	0	0		0	0	0	0	0	0		0	0	0	0	0	0
1341	2018-10-10	1223.5	1223.5	1223.5	1223.5	1223.5	1223.5	1223.5		0	0	0	0	0	0	0	0	0	0	0	0		0	0	0	0	0	0		0	0	0	0	0	0		0	0	0	0	0	0
1342	2018-10-09	1189.3	1189.3	1189.3	1189.3	1189.3	1189.3	1189.3		0	0	0	0	0	0	0	0	0	0	0	0		0	0	0	0	0	0		0	0	0	0	0	0		0	0	0	0	0	0
1343	2018-10-08	1187.2	1187.2	1187.2	1187.2	1187.2	1187.2	1187.2		0	0	0	0	0	0	0	0	0	0	0	0		0	0	0	0	0	0		0	0	0	0	0	0		0	0	0	0	0	0
1344	2018-10-07	1184.4	1184.4	1184.4	1184.4	1184.4	1184.4	1184.4		0	0	0	0	0	0	0	0	0	0	0	0		0	0	0	0	0	0		0	0	0	0	0	0		0	0	0	0	0	0
1345	2018-10-04	1201.2	1201.2	1201.2	1201.2	1201.2	1201.2	1201.2		0	0	0	0	0	0	0	0	0	0	0	0		0	0	0	0	0	0		0	0	0	0	0	0		0	0	0	0	0	0
1346	2018-10-03	1197.2	1197.2	1197.2	1197.2	1197.2	1197.2	1197.2		0	0	0	0	0	0	0	0	0	0	0	0		0	0	0	0	0	0		0	0	0	0	0	0		0	0	0	0	0	0
1347	2018-10-02	1198.3	1198.3	1198.3	1198.3	1198.3	1198.3	1198.3		0	0	0	0	0	0	0	0	0	0	0	0		0	0	0	0	0	0		0	0	0	0	0	0		0	0	0	0	0	0
1348	2018-10-01	1202.4	1202.4	1202.4	1202.4	1202.4	1202.4	1202.4		0	0	0	0	0	0	0	0	0	0	0	0		0	0	0	0	0	0		0	0	0	0	0	0		0	0	0	0	0	0
1349	2018-09-30	1187.1	1187.1	1187.1	1187.1	1187.1	1187.1	1187.1		0	0	0	0	0	0	0	0	0	0	0	0		0	0	0	0	0	0		0	0	0	0	0	0		0	0	0	0	0	0
1350	2018-09-27	1191.5	1191.5	1191.5	1191.5	1191.5	1191.5	1191.5		0	0	0	0	0	0	0	0	0	0	0	0		0	0	0	0	0	0		0	0	0	0	0	0		0	0	0	0	0	0
1351	2018-09-26	1182.3	1182.3	1182.3	1182.3	1182.3	1182.3	1182.3		0	0	0	0	0	0	0	0	0	0	0	0		0	0	0	0	0	0		0	0	0	0	0	0		0	0	0	0	0	0
1352	2018-09-25	1194	1194.0	1194.0	1194.0	1194.0	1194.0	1194.0		0	0	0	0	0	0	0	0	0	0	0	0		0	0	0	0	0	0		0	0	0	0	0	0		0	0	0	0	0	0
1353	2018-09-24	1200	1200.0	1200.0	1200.0	1200.0	1200.0	1200.0		0	0	0	0	0	0	0	0	0	0	0	0		0	0	0	0	0	0		0	0	0	0	0	0		0	0	0	0	0	0
1354	2018-09-23	1199.3	1199.3	1199.3	1199.3	1199.3	1199.3	1199.3		0	0	0	0	0	0	0	0	0	0	0	0		0	0	0	0	0	0		0	0	0	0	0	0		0	0	0	0	0	0
1355	2018-09-20	1196.2	1196.2	1196.2	1196.2	1196.2	1196.2	1196.2		0	0	0	0	0	0	0	0	0	0	0	0		0	0	0	0	0	0		0	0	0	0	0	0		0	0	0	0	0	0
1356	2018-09-19	1206.2	1206.2	1206.2	1206.2	1206.2	1206.2	1206.2		0	0	0	0	0	0	0	0	0	0	0	0		0	0	0	0	0	0		0	0	0	0	0	0		0	0	0	0	0	0
1357	2018-09-18	1202.2	1109.887	1198.756	1201.1	1201.446	1201.5	1128.800		-92.313	92.313	-3.444	3.444	-1.1	1.1	-0.754	0.754	-0.7	0.7	-73.4	73.4		8521.69	11.8611	1.21	0.568516	0.49	5387.56		0.0767867	0.00286475	0.000914989	0.000627183	0.000582266	0.0610547		0.0767867	0.00286475	0.000914989	0.000627183	0.000582266	0.0610547
1358	2018-09-17	1196.8	1196.8	1196.8	1196.8	1196.8	1196.8	1196.8		0	0	0	0	0	0	0	0	0	0	0	0		0	0	0	0	0	0		0	0	0	0	0	0		0	0	0	0	0	0
1359	2018-09-16	1199.7	1199.7	1199.7	1199.7	1199.7	1199.7	1199.7		0	0	0	0	0	0	0	0	0	0	0	0		0	0	0	0	0	0		0	0	0	0	0	0		0	0	0	0	0	0
1360	2018-09-13	1195	1195.0	1195.0	1195.0	1195.0	1195.0	1195.0		0	0	0	0	0	0	0	0	0	0	0	0		0	0	0	0	0	0		0	0	0	0	0	0		0	0	0	0	0	0
1361	2018-09-12	1202	1202.0	1202.0	1202.0	1202.0	1202.0	1202.0		0	0	0	0	0	0	0	0	0	0	0	0		0	0	0	0	0	0		0	0	0	0	0	0		0	0	0	0	0	0
1362	2018-09-11	1204.7	1204.7	1204.7	1204.7	1204.7	1204.7	1204.7		0	0	0	0	0	0	0	0	0	0	0	0		0	0	0	0	0	0		0	0	0	0	0	0		0	0	0	0	0	0
1363	2018-09-10	1195.4	1195.4	1195.4	1195.4	1195.4	1195.4	1195.4		0	0	0	0	0	0	0	0	0	0	0	0		0	0	0	0	0	0		0	0	0	0	0	0		0	0	0	0	0	0
1364	2018-09-09	1193	1193.0	1193.0	1193.0	1193.0	1193.0	1193.0		0	0	0	0	0	0	0	0	0	0	0	0		0	0	0	0	0	0		0	0	0	0	0	0		0	0	0	0	0	0
1365	2018-09-06	1193.6	1193.6	1193.6	1193.6	1193.6	1193.6	1193.6		0	0	0	0	0	0	0	0	0	0	0	0		0	0	0	0	0	0		0	0	0	0	0	0		0	0	0	0	0	0
1366	2018-09-05	1197.9	1197.9	1197.9	1197.9	1197.9	1197.9	1197.9		0	0	0	0	0	0	0	0	0	0	0	0		0	0	0	0	0	0		0	0	0	0	0	0		0	0	0	0	0	0
1367	2018-09-04	1194.9	1194.9	1194.9	1194.9	1194.9	1194.9	1194.9		0	0	0	0	0	0	0	0	0	0	0	0		0	0	0	0	0	0		0	0	0	0	0	0		0	0	0	0	0	0
1368	2018-09-03	1192.7	1192.7	1192.7	1192.7	1192.7	1192.7	1192.7		0	0	0	0	0	0	0	0	0	0	0	0		0	0	0	0	0	0		0	0	0	0	0	0		0	0	0	0	0	0
1369	2018-08-30	1200.3	1109.887	1200.568	1199.9	1201.298	1200.567	1128.985		-90.413	90.413	0.268	0.268	-0.4	0.4	0.998	0.998	0.267	0.267	-71.315	71.315		8174.51	0.071824	0.16	0.996004	0.071289	5085.83		0.0753253	-0.000223278	0.00033325	-0.000831459	-0.000222444	0.0594143		0.0753253	0.000223278	0.00033325	0.000831459	0.000222444	0.0594143
1370	2018-08-29	1197.7	1109.887	1200.568	1200.267	1200.999	1202.533	1128.808		-87.813	87.813	2.868	2.868	2.567	2.567	3.299	3.299	4.833	4.833	-68.892	68.892		7711.12	8.22542	6.58949	10.8834	23.3579	4746.11		0.073318	-0.00239459	-0.00214327	-0.00275445	-0.00403523	0.0575202		0.073318	0.00239459	0.00214327	0.00275445	0.00403523	0.0575202
1371	2018-08-28	1204.5	1204.5	1204.5	1204.5	1204.5	1204.5	1204.5		0	0	0	0	0	0	0	0	0	0	0	0		0	0	0	0	0	0		0	0	0	0	0	0		0	0	0	0	0	0
1372	2018-08-27	1207.4	1207.4	1207.4	1207.4	1207.4	1207.4	1207.4		0	0	0	0	0	0	0	0	0	0	0	0		0	0	0	0	0	0		0	0	0	0	0	0		0	0	0	0	0	0
1373	2018-08-26	1209	1209.0	1209.0	1209.0	1209.0	1209.0	1209.0		0	0	0	0	0	0	0	0	0	0	0	0		0	0	0	0	0	0		0	0	0	0	0	0		0	0	0	0	0	0
1374	2018-08-23	1206.3	1206.3	1206.3	1206.3	1206.3	1206.3	1206.3		0	0	0	0	0	0	0	0	0	0	0	0		0	0	0	0	0	0		0	0	0	0	0	0		0	0	0	0	0	0
1375	2018-08-22	1187	1187.0	1187.0	1187.0	1187.0	1187.0	1187.0		0	0	0	0	0	0	0	0	0	0	0	0		0	0	0	0	0	0		0	0	0	0	0	0		0	0	0	0	0	0
1376	2018-08-21	1196.3	1196.3	1196.3	1196.3	1196.3	1196.3	1196.3		0	0	0	0	0	0	0	0	0	0	0	0		0	0	0	0	0	0		0	0	0	0	0	0		0	0	0	0	0	0
1377	2018-08-20	1192.6	1192.6	1192.6	1192.6	1192.6	1192.6	1192.6		0	0	0	0	0	0	0	0	0	0	0	0		0	0	0	0	0	0		0	0	0	0	0	0		0	0	0	0	0	0
1378	2018-08-19	1186.8	1186.8	1186.8	1186.8	1186.8	1186.8	1186.8		0	0	0	0	0	0	0	0	0	0	0	0		0	0	0	0	0	0		0	0	0	0	0	0		0	0	0	0	0	0
1379	2018-08-16	1176.5	1176.5	1176.5	1176.5	1176.5	1176.5	1176.5		0	0	0	0	0	0	0	0	0	0	0	0		0	0	0	0	0	0		0	0	0	0	0	0		0	0	0	0	0	0
1380	2018-08-15	1176.2	1176.2	1176.2	1176.2	1176.2	1176.2	1176.2		0	0	0	0	0	0	0	0	0	0	0	0		0	0	0	0	0	0		0	0	0	0	0	0		0	0	0	0	0	0
1381	2018-08-14	1177.5	1177.5	1177.5	1177.5	1177.5	1177.5	1177.5		0	0	0	0	0	0	0	0	0	0	0	0		0	0	0	0	0	0		0	0	0	0	0	0		0	0	0	0	0	0
1382	2018-08-13	1193	1193.0	1193.0	1193.0	1193.0	1193.0	1193.0		0	0	0	0	0	0	0	0	0	0	0	0		0	0	0	0	0	0		0	0	0	0	0	0		0	0	0	0	0	0
1383	2018-08-12	1191.3	1191.3	1191.3	1191.3	1191.3	1191.3	1191.3		0	0	0	0	0	0	0	0	0	0	0	0		0	0	0	0	0	0		0	0	0	0	0	0		0	0	0	0	0	0
1384	2018-08-09	1211.1	1211.1	1211.1	1211.1	1211.1	1211.1	1211.1		0	0	0	0	0	0	0	0	0	0	0	0		0	0	0	0	0	0		0	0	0	0	0	0		0	0	0	0	0	0
1385	2018-08-08	1211.9	1211.9	1211.9	1211.9	1211.9	1211.9	1211.9		0	0	0	0	0	0	0	0	0	0	0	0		0	0	0	0	0	0		0	0	0	0	0	0		0	0	0	0	0	0
1386	2018-08-07	1212.6	1212.6	1212.6	1212.6	1212.6	1212.6	1212.6		0	0	0	0	0	0	0	0	0	0	0	0		0	0	0	0	0	0		0	0	0	0	0	0		0	0	0	0	0	0
1387	2018-08-06	1209.6	1209.6	1209.6	1209.6	1209.6	1209.6	1209.6		0	0	0	0	0	0	0	0	0	0	0	0		0	0	0	0	0	0		0	0	0	0	0	0		0	0	0	0	0	0
1388	2018-08-05	1208.6	1109.887	1212.512	1212.5	1207.849	1210.750	1129.488		-98.713	98.713	3.912	3.912	3.9	3.9	-0.751	0.751	2.15	2.15	-79.112	79.112		9744.26	15.3037	15.21	0.564001	4.6225	6258.71		0.0816755	-0.0032368	-0.00322687	0.00062138	-0.00177892	0.0654576		0.0816755	0.0032368	0.00322687	0.00062138	0.00177892	0.0654576
1389	2018-08-02	1214.2	1214.2	1214.2	1214.2	1214.2	1214.2	1214.2		0	0	0	0	0	0	0	0	0	0	0	0		0	0	0	0	0	0		0	0	0	0	0	0		0	0	0	0	0	0
1390	2018-08-01	1210.6	1210.6	1210.6	1210.6	1210.6	1210.6	1210.6		0	0	0	0	0	0	0	0	0	0	0	0		0	0	0	0	0	0		0	0	0	0	0	0		0	0	0	0	0	0
1391	2018-07-31	1217.9	1217.9	1217.9	1217.9	1217.9	1217.9	1217.9		0	0	0	0	0	0	0	0	0	0	0	0		0	0	0	0	0	0		0	0	0	0	0	0		0	0	0	0	0	0
1392	2018-07-30	1223.7	1223.7	1223.7	1223.7	1223.7	1223.7	1223.7		0	0	0	0	0	0	0	0	0	0	0	0		0	0	0	0	0	0		0	0	0	0	0	0		0	0	0	0	0	0
1393	2018-07-29	1221.3	1221.3	1221.3	1221.3	1221.3	1221.3	1221.3		0	0	0	0	0	0	0	0	0	0	0	0		0	0	0	0	0	0		0	0	0	0	0	0		0	0	0	0	0	0
1394	2018-07-26	1222.6	1222.6	1222.6	1222.6	1222.6	1222.6	1222.6		0	0	0	0	0	0	0	0	0	0	0	0		0	0	0	0	0	0		0	0	0	0	0	0		0	0	0	0	0	0
1395	2018-07-25	1225.3	1225.3	1225.3	1225.3	1225.3	1225.3	1225.3		0	0	0	0	0	0	0	0	0	0	0	0		0	0	0	0	0	0		0	0	0	0	0	0		0	0	0	0	0	0
1396	2018-07-24	1231.4	1231.4	1231.4	1231.4	1231.4	1231.4	1231.4		0	0	0	0	0	0	0	0	0	0	0	0		0	0	0	0	0	0		0	0	0	0	0	0		0	0	0	0	0	0
1397	2018-07-23	1223.9	1223.9	1223.9	1223.9	1223.9	1223.9	1223.9		0	0	0	0	0	0	0	0	0	0	0	0		0	0	0	0	0	0		0	0	0	0	0	0		0	0	0	0	0	0
1398	2018-07-22	1224	1224.0	1224.0	1224.0	1224.0	1224.0	1224.0		0	0	0	0	0	0	0	0	0	0	0	0		0	0	0	0	0	0		0	0	0	0	0	0		0	0	0	0	0	0
1399	2018-07-19	1229.5	1229.5	1229.5	1229.5	1229.5	1229.5	1229.5		0	0	0	0	0	0	0	0	0	0	0	0		0	0	0	0	0	0		0	0	0	0	0	0		0	0	0	0	0	0
1400	2018-07-18	1222.4	1222.4	1222.4	1222.4	1222.4	1222.4	1222.4		0	0	0	0	0	0	0	0	0	0	0	0		0	0	0	0	0	0		0	0	0	0	0	0		0	0	0	0	0	0
1401	2018-07-17	1226.3	1226.3	1226.3	1226.3	1226.3	1226.3	1226.3		0	0	0	0	0	0	0	0	0	0	0	0		0	0	0	0	0	0		0	0	0	0	0	0		0	0	0	0	0	0
1402	2018-07-16	1225.7	1225.7	1225.7	1225.7	1225.7	1225.7	1225.7		0	0	0	0	0	0	0	0	0	0	0	0		0	0	0	0	0	0		0	0	0	0	0	0		0	0	0	0	0	0
1403	2018-07-15	1238.1	1238.1	1238.1	1238.1	1238.1	1238.1	1238.1		0	0	0	0	0	0	0	0	0	0	0	0		0	0	0	0	0	0		0	0	0	0	0	0		0	0	0	0	0	0
1404	2018-07-12	1239.6	1239.6	1239.6	1239.6	1239.6	1239.6	1239.6		0	0	0	0	0	0	0	0	0	0	0	0		0	0	0	0	0	0		0	0	0	0	0	0		0	0	0	0	0	0
1405	2018-07-11	1245	1245.0	1245.0	1245.0	1245.0	1245.0	1245.0		0	0	0	0	0	0	0	0	0	0	0	0		0	0	0	0	0	0		0	0	0	0	0	0		0	0	0	0	0	0
1406	2018-07-10	1242.8	1242.8	1242.8	1242.8	1242.8	1242.8	1242.8		0	0	0	0	0	0	0	0	0	0	0	0		0	0	0	0	0	0		0	0	0	0	0	0		0	0	0	0	0	0
1407	2018-07-09	1253.8	1253.8	1253.8	1253.8	1253.8	1253.8	1253.8		0	0	0	0	0	0	0	0	0	0	0	0		0	0	0	0	0	0		0	0	0	0	0	0		0	0	0	0	0	0
1408	2018-07-08	1258.1	1258.1	1258.1	1258.1	1258.1	1258.1	1258.1		0	0	0	0	0	0	0	0	0	0	0	0		0	0	0	0	0	0		0	0	0	0	0	0		0	0	0	0	0	0
1409	2018-07-05	1254.3	1254.3	1254.3	1254.3	1254.3	1254.3	1254.3		0	0	0	0	0	0	0	0	0	0	0	0		0	0	0	0	0	0		0	0	0	0	0	0		0	0	0	0	0	0
1410	2018-07-04	1257.3	1257.3	1257.3	1257.3	1257.3	1257.3	1257.3		0	0	0	0	0	0	0	0	0	0	0	0		0	0	0	0	0	0		0	0	0	0	0	0		0	0	0	0	0	0
1411	2018-07-03	1251.6	1251.6	1251.6	1251.6	1251.6	1251.6	1251.6		0	0	0	0	0	0	0	0	0	0	0	0		0	0	0	0	0	0		0	0	0	0	0	0		0	0	0	0	0	0
1412	2018-07-01	1239.8	1239.8	1239.8	1239.8	1239.8	1239.8	1239.8		0	0	0	0	0	0	0	0	0	0	0	0		0	0	0	0	0	0		0	0	0	0	0	0		0	0	0	0	0	0
1413	2018-06-28	1251.3	1251.3	1251.3	1251.3	1251.3	1251.3	1251.3		0	0	0	0	0	0	0	0	0	0	0	0		0	0	0	0	0	0		0	0	0	0	0	0		0	0	0	0	0	0
1414	2018-06-27	1247.8	1109.887	1247.982	1248.3	1248.217	1252.050	1132.264		-137.913	137.913	0.182	0.182	0.5	0.5	0.417	0.417	4.25	4.25	-115.536	115.536		19020	0.033124	0.25	0.173889	18.0625	13348.6		0.110525	-0.000145857	-0.000400705	-0.000334188	-0.00340599	0.0925918		0.110525	0.000145857	0.000400705	0.000334188	0.00340599	0.0925918
1415	2018-06-26	1252.8	1252.8	1252.8	1252.8	1252.8	1252.8	1252.8		0	0	0	0	0	0	0	0	0	0	0	0		0	0	0	0	0	0		0	0	0	0	0	0		0	0	0	0	0	0
1416	2018-06-25	1256.6	1256.6	1256.6	1256.6	1256.6	1256.6	1256.6		0	0	0	0	0	0	0	0	0	0	0	0		0	0	0	0	0	0		0	0	0	0	0	0		0	0	0	0	0	0
1417	2018-06-24	1265.6	1265.6	1265.6	1265.6	1265.6	1265.6	1265.6		0	0	0	0	0	0	0	0	0	0	0	0		0	0	0	0	0	0		0	0	0	0	0	0		0	0	0	0	0	0
1418	2018-06-21	1267.4	1109.887	1267.606	1268.267	1268.247	1266.8	1133.730		-157.513	157.513	0.206	0.206	0.867	0.867	0.847	0.847	-0.6	0.6	-133.67	133.67		24810.3	0.042436	0.751689	0.717409	0.36	17867.7		0.12428	-0.000162537	-0.000684078	-0.000668297	0.00047341	0.105468		0.12428	0.000162537	0.000684078	0.000668297	0.00047341	0.105468
1419	2018-06-20	1267.2	1267.2	1267.2	1267.2	1267.2	1267.2	1267.2		0	0	0	0	0	0	0	0	0	0	0	0		0	0	0	0	0	0		0	0	0	0	0	0		0	0	0	0	0	0
1420	2018-06-19	1271.2	1271.2	1271.2	1271.2	1271.2	1271.2	1271.2		0	0	0	0	0	0	0	0	0	0	0	0		0	0	0	0	0	0		0	0	0	0	0	0		0	0	0	0	0	0
1421	2018-06-18	1275.6	1275.6	1275.6	1275.6	1275.6	1275.6	1275.6		0	0	0	0	0	0	0	0	0	0	0	0		0	0	0	0	0	0		0	0	0	0	0	0		0	0	0	0	0	0
1422	2018-06-17	1276.2	1276.2	1276.2	1276.2	1276.2	1276.2	1276.2		0	0	0	0	0	0	0	0	0	0	0	0		0	0	0	0	0	0		0	0	0	0	0	0		0	0	0	0	0	0
1423	2018-06-14	1274.6	1274.6	1274.6	1274.6	1274.6	1274.6	1274.6		0	0	0	0	0	0	0	0	0	0	0	0		0	0	0	0	0	0		0	0	0	0	0	0		0	0	0	0	0	0
1424	2018-06-13	1304	1304.0	1304.0	1304.0	1304.0	1304.0	1304.0		0	0	0	0	0	0	0	0	0	0	0	0		0	0	0	0	0	0		0	0	0	0	0	0		0	0	0	0	0	0
1425	2018-06-12	1296.9	1296.9	1296.9	1296.9	1296.9	1296.9	1296.9		0	0	0	0	0	0	0	0	0	0	0	0		0	0	0	0	0	0		0	0	0	0	0	0		0	0	0	0	0	0
1426	2018-06-11	1295.1	1295.1	1295.1	1295.1	1295.1	1295.1	1295.1		0	0	0	0	0	0	0	0	0	0	0	0		0	0	0	0	0	0		0	0	0	0	0	0		0	0	0	0	0	0
1427	2018-06-10	1298.9	1298.9	1298.9	1298.9	1298.9	1298.9	1298.9		0	0	0	0	0	0	0	0	0	0	0	0		0	0	0	0	0	0		0	0	0	0	0	0		0	0	0	0	0	0
1428	2018-06-07	1298.1	1298.1	1298.1	1298.1	1298.1	1298.1	1298.1		0	0	0	0	0	0	0	0	0	0	0	0		0	0	0	0	0	0		0	0	0	0	0	0		0	0	0	0	0	0
1429	2018-06-06	1298.7	1298.7	1298.7	1298.7	1298.7	1298.7	1298.7		0	0	0	0	0	0	0	0	0	0	0	0		0	0	0	0	0	0		0	0	0	0	0	0		0	0	0	0	0	0
1430	2018-06-05	1297.1	1297.1	1297.1	1297.1	1297.1	1297.1	1297.1		0	0	0	0	0	0	0	0	0	0	0	0		0	0	0	0	0	0		0	0	0	0	0	0		0	0	0	0	0	0
1431	2018-06-04	1297.5	1297.5	1297.5	1297.5	1297.5	1297.5	1297.5		0	0	0	0	0	0	0	0	0	0	0	0		0	0	0	0	0	0		0	0	0	0	0	0		0	0	0	0	0	0
1432	2018-06-03	1293.1	1293.1	1293.1	1293.1	1293.1	1293.1	1293.1		0	0	0	0	0	0	0	0	0	0	0	0		0	0	0	0	0	0		0	0	0	0	0	0		0	0	0	0	0	0
1433	2018-05-31	1294.8	1294.8	1294.8	1294.8	1294.8	1294.8	1294.8		0	0	0	0	0	0	0	0	0	0	0	0		0	0	0	0	0	0		0	0	0	0	0	0		0	0	0	0	0	0
1434	2018-05-30	1300.1	1300.1	1300.1	1300.1	1300.1	1300.1	1300.1		0	0	0	0	0	0	0	0	0	0	0	0		0	0	0	0	0	0		0	0	0	0	0	0		0	0	0	0	0	0
1435	2018-05-29	1301.5	1301.5	1301.5	1301.5	1301.5	1301.5	1301.5		0	0	0	0	0	0	0	0	0	0	0	0		0	0	0	0	0	0		0	0	0	0	0	0		0	0	0	0	0	0
1436	2018-05-28	1298.7	1298.7	1298.7	1298.7	1298.7	1298.7	1298.7		0	0	0	0	0	0	0	0	0	0	0	0		0	0	0	0	0	0		0	0	0	0	0	0		0	0	0	0	0	0
1437	2018-05-24	1303.3	1303.3	1303.3	1303.3	1303.3	1303.3	1303.3		0	0	0	0	0	0	0	0	0	0	0	0		0	0	0	0	0	0		0	0	0	0	0	0		0	0	0	0	0	0
1438	2018-05-23	1303.7	1109.887	1305.450	1304.633	1303.512	1296.3	1136.578		-193.813	193.813	1.75	1.75	0.933	0.933	-0.188	0.188	-7.4	7.4	-167.122	167.122		37563.5	3.0625	0.870489	0.035344	54.76	27929.8		0.148664	-0.00134233	-0.000715655	0.000144205	0.00567615	0.128191		0.148664	0.00134233	0.000715655	0.000144205	0.00567615	0.128191
1439	2018-05-22	1289.3	1289.3	1289.3	1289.3	1289.3	1289.3	1289.3		0	0	0	0	0	0	0	0	0	0	0	0		0	0	0	0	0	0		0	0	0	0	0	0		0	0	0	0	0	0
1440	2018-05-21	1291.7	1291.7	1291.7	1291.7	1291.7	1291.7	1291.7		0	0	0	0	0	0	0	0	0	0	0	0		0	0	0	0	0	0		0	0	0	0	0	0		0	0	0	0	0	0
1441	2018-05-20	1290.2	1290.2	1290.2	1290.2	1290.2	1290.2	1290.2		0	0	0	0	0	0	0	0	0	0	0	0		0	0	0	0	0	0		0	0	0	0	0	0		0	0	0	0	0	0
1442	2018-05-17	1290.2	1290.2	1290.2	1290.2	1290.2	1290.2	1290.2		0	0	0	0	0	0	0	0	0	0	0	0		0	0	0	0	0	0		0	0	0	0	0	0		0	0	0	0	0	0
1443	2018-05-16	1288.2	1288.2	1288.2	1288.2	1288.2	1288.2	1288.2		0	0	0	0	0	0	0	0	0	0	0	0		0	0	0	0	0	0		0	0	0	0	0	0		0	0	0	0	0	0
1444	2018-05-15	1290.2	1109.887	1288.696	1288.0	1287.658	1288.550	1135.457		-180.313	180.313	-1.504	1.504	-2.2	2.2	-2.542	2.542	-1.65	1.65	-154.743	154.743		32512.8	2.26202	4.84	6.46176	2.7225	23945.4		0.139756	0.00116571	0.00170516	0.00197024	0.00127887	0.119937		0.139756	0.00116571	0.00170516	0.00197024	0.00127887	0.119937
1445	2018-05-14	1288.9	1288.9	1288.9	1288.9	1288.9	1288.9	1288.9		0	0	0	0	0	0	0	0	0	0	0	0		0	0	0	0	0	0		0	0	0	0	0	0		0	0	0	0	0	0
1446	2018-05-13	1316.5	1316.5	1316.5	1316.5	1316.5	1316.5	1316.5		0	0	0	0	0	0	0	0	0	0	0	0		0	0	0	0	0	0		0	0	0	0	0	0		0	0	0	0	0	0
1447	2018-05-10	1319	1319.0	1319.0	1319.0	1319.0	1319.0	1319.0		0	0	0	0	0	0	0	0	0	0	0	0		0	0	0	0	0	0		0	0	0	0	0	0		0	0	0	0	0	0
1448	2018-05-09	1320.8	1320.8	1320.8	1320.8	1320.8	1320.8	1320.8		0	0	0	0	0	0	0	0	0	0	0	0		0	0	0	0	0	0		0	0	0	0	0	0		0	0	0	0	0	0
1449	2018-05-08	1311.3	1109.887	1310.370	1311.133	1311.398	1317.933	1137.218		-201.413	201.413	-0.93	0.93	-0.167	0.167	0.098	0.098	6.633	6.633	-174.082	174.082		40567.2	0.8649	0.027889	0.009604	43.9967	30304.5		0.153598	0.00070922	0.000127355	-7.4735e-05	-0.00505834	0.132755		0.153598	0.00070922	0.000127355	7.4735e-05	0.00505834	0.132755
1450	2018-05-07	1312	1109.887	1310.370	1311.733	1310.752	1315.067	1137.124		-202.113	202.113	-1.63	1.63	-0.267	0.267	-1.248	1.248	3.067	3.067	-174.876	174.876		40849.7	2.6569	0.071289	1.5575	9.40649	30581.6		0.15405	0.00124238	0.000203506	0.00095122	-0.00233765	0.13329		0.15405	0.00124238	0.000203506	0.00095122	0.00233765	0.13329
1451	2018-05-06	1312.2	1312.2	1312.2	1312.2	1312.2	1312.2	1312.2		0	0	0	0	0	0	0	0	0	0	0	0		0	0	0	0	0	0		0	0	0	0	0	0		0	0	0	0	0	0
1452	2018-05-03	1312.7	1109.887	1310.370	1312.067	1313.626	1311.075	1137.336		-202.813	202.813	-2.33	2.33	-0.633	0.633	0.926	0.926	-1.625	1.625	-175.364	175.364		41133.1	5.4289	0.400689	0.857476	2.64062	30752.5		0.154501	0.00177497	0.000482212	-0.000705416	0.00123791	0.13359		0.154501	0.00177497	0.000482212	0.000705416	0.00123791	0.13359
1453	2018-05-02	1310.7	1310.7	1310.7	1310.7	1310.7	1310.7	1310.7		0	0	0	0	0	0	0	0	0	0	0	0		0	0	0	0	0	0		0	0	0	0	0	0		0	0	0	0	0	0
1454	2018-05-01	1302.6	1302.6	1302.6	1302.6	1302.6	1302.6	1302.6		0	0	0	0	0	0	0	0	0	0	0	0		0	0	0	0	0	0		0	0	0	0	0	0		0	0	0	0	0	0
1455	2018-04-30	1303.8	1303.8	1303.8	1303.8	1303.8	1303.8	1303.8		0	0	0	0	0	0	0	0	0	0	0	0		0	0	0	0	0	0		0	0	0	0	0	0		0	0	0	0	0	0
1456	2018-04-29	1316.2	1316.2	1316.2	1316.2	1316.2	1316.2	1316.2		0	0	0	0	0	0	0	0	0	0	0	0		0	0	0	0	0	0		0	0	0	0	0	0		0	0	0	0	0	0
1457	2018-04-26	1320.3	1320.3	1320.3	1320.3	1320.3	1320.3	1320.3		0	0	0	0	0	0	0	0	0	0	0	0		0	0	0	0	0	0		0	0	0	0	0	0		0	0	0	0	0	0
1458	2018-04-25	1316.3	1316.3	1316.3	1316.3	1316.3	1316.3	1316.3		0	0	0	0	0	0	0	0	0	0	0	0		0	0	0	0	0	0		0	0	0	0	0	0		0	0	0	0	0	0
1459	2018-04-24	1321.2	1321.2	1321.2	1321.2	1321.2	1321.2	1321.2		0	0	0	0	0	0	0	0	0	0	0	0		0	0	0	0	0	0		0	0	0	0	0	0		0	0	0	0	0	0
1460	2018-04-23	1331.4	1331.4	1331.4	1331.4	1331.4	1331.4	1331.4		0	0	0	0	0	0	0	0	0	0	0	0		0	0	0	0	0	0		0	0	0	0	0	0		0	0	0	0	0	0
1461	2018-04-22	1322.5	1322.5	1322.5	1322.5	1322.5	1322.5	1322.5		0	0	0	0	0	0	0	0	0	0	0	0		0	0	0	0	0	0		0	0	0	0	0	0		0	0	0	0	0	0
1462	2018-04-19	1336.7	1336.7	1336.7	1336.7	1336.7	1336.7	1336.7		0	0	0	0	0	0	0	0	0	0	0	0		0	0	0	0	0	0		0	0	0	0	0	0		0	0	0	0	0	0
1463	2018-04-18	1346.8	1346.8	1346.8	1346.8	1346.8	1346.8	1346.8		0	0	0	0	0	0	0	0	0	0	0	0		0	0	0	0	0	0		0	0	0	0	0	0		0	0	0	0	0	0
1464	2018-04-17	1351.2	1351.2	1351.2	1351.2	1351.2	1351.2	1351.2		0	0	0	0	0	0	0	0	0	0	0	0		0	0	0	0	0	0		0	0	0	0	0	0		0	0	0	0	0	0
1465	2018-04-16	1347.2	1347.2	1347.2	1347.2	1347.2	1347.2	1347.2		0	0	0	0	0	0	0	0	0	0	0	0		0	0	0	0	0	0		0	0	0	0	0	0		0	0	0	0	0	0
1466	2018-04-15	1347.5	1347.5	1347.5	1347.5	1347.5	1347.5	1347.5		0	0	0	0	0	0	0	0	0	0	0	0		0	0	0	0	0	0		0	0	0	0	0	0		0	0	0	0	0	0
1467	2018-04-12	1344.8	1344.8	1344.8	1344.8	1344.8	1344.8	1344.8		0	0	0	0	0	0	0	0	0	0	0	0		0	0	0	0	0	0		0	0	0	0	0	0		0	0	0	0	0	0
1468	2018-04-11	1338.4	1338.4	1338.4	1338.4	1338.4	1338.4	1338.4		0	0	0	0	0	0	0	0	0	0	0	0		0	0	0	0	0	0		0	0	0	0	0	0		0	0	0	0	0	0
1469	2018-04-10	1356.5	1356.5	1356.5	1356.5	1356.5	1356.5	1356.5		0	0	0	0	0	0	0	0	0	0	0	0		0	0	0	0	0	0		0	0	0	0	0	0		0	0	0	0	0	0
1470	2018-04-09	1342	1342.0	1342.0	1342.0	1342.0	1342.0	1342.0		0	0	0	0	0	0	0	0	0	0	0	0		0	0	0	0	0	0		0	0	0	0	0	0		0	0	0	0	0	0
1471	2018-04-08	1336.3	1336.3	1336.3	1336.3	1336.3	1336.3	1336.3		0	0	0	0	0	0	0	0	0	0	0	0		0	0	0	0	0	0		0	0	0	0	0	0		0	0	0	0	0	0
1472	2018-04-05	1331.9	1331.9	1331.9	1331.9	1331.9	1331.9	1331.9		0	0	0	0	0	0	0	0	0	0	0	0		0	0	0	0	0	0		0	0	0	0	0	0		0	0	0	0	0	0
1473	2018-04-04	1324.3	1324.3	1324.3	1324.3	1324.3	1324.3	1324.3		0	0	0	0	0	0	0	0	0	0	0	0		0	0	0	0	0	0		0	0	0	0	0	0		0	0	0	0	0	0
1474	2018-04-03	1335.8	1335.8	1335.8	1335.8	1335.8	1335.8	1335.8		0	0	0	0	0	0	0	0	0	0	0	0		0	0	0	0	0	0		0	0	0	0	0	0		0	0	0	0	0	0
1475	2018-04-02	1332.8	1332.8	1332.8	1332.8	1332.8	1332.8	1332.8		0	0	0	0	0	0	0	0	0	0	0	0		0	0	0	0	0	0		0	0	0	0	0	0		0	0	0	0	0	0
1476	2018-04-01	1342.1	1342.1	1342.1	1342.1	1342.1	1342.1	1342.1		0	0	0	0	0	0	0	0	0	0	0	0		0	0	0	0	0	0		0	0	0	0	0	0		0	0	0	0	0	0
1477	2018-03-28	1322.8	1322.8	1322.8	1322.8	1322.8	1322.8	1322.8		0	0	0	0	0	0	0	0	0	0	0	0		0	0	0	0	0	0		0	0	0	0	0	0		0	0	0	0	0	0
1478	2018-03-27	1324.2	1109.887	1325.573	1327.567	1327.962	1332.050	1139.530		-214.313	214.313	1.373	1.373	3.367	3.367	3.762	3.762	7.85	7.85	-184.67	184.67		45930.1	1.88513	11.3367	14.1526	61.6225	34103		0.161843	-0.00103685	-0.00254267	-0.00284096	-0.00592811	0.139458		0.161843	0.00103685	0.00254267	0.00284096	0.00592811	0.139458
1479	2018-03-26	1341.3	1341.3	1341.3	1341.3	1341.3	1341.3	1341.3		0	0	0	0	0	0	0	0	0	0	0	0		0	0	0	0	0	0		0	0	0	0	0	0		0	0	0	0	0	0
1480	2018-03-25	1354.4	1354.4	1354.4	1354.4	1354.4	1354.4	1354.4		0	0	0	0	0	0	0	0	0	0	0	0		0	0	0	0	0	0		0	0	0	0	0	0		0	0	0	0	0	0
1481	2018-03-22	1349.3	1349.3	1349.3	1349.3	1349.3	1349.3	1349.3		0	0	0	0	0	0	0	0	0	0	0	0		0	0	0	0	0	0		0	0	0	0	0	0		0	0	0	0	0	0
1482	2018-03-21	1326.6	1109.887	1323.5	1327.167	1327.334	1335.0	1138.534		-216.713	216.713	-3.1	3.1	0.567	0.567	0.734	0.734	8.4	8.4	-188.066	188.066		46964.5	9.61	0.321489	0.538756	70.56	35368.8		0.16336	0.0023368	-0.000427408	-0.000553294	-0.00633198	0.141765		0.16336	0.0023368	0.000427408	0.000553294	0.00633198	0.141765
1483	2018-03-20	1320.7	1320.7	1320.7	1320.7	1320.7	1320.7	1320.7		0	0	0	0	0	0	0	0	0	0	0	0		0	0	0	0	0	0		0	0	0	0	0	0		0	0	0	0	0	0
1484	2018-03-19	1311.1	1311.1	1311.1	1311.1	1311.1	1311.1	1311.1		0	0	0	0	0	0	0	0	0	0	0	0		0	0	0	0	0	0		0	0	0	0	0	0		0	0	0	0	0	0
1485	2018-03-18	1316.8	1316.8	1316.8	1316.8	1316.8	1316.8	1316.8		0	0	0	0	0	0	0	0	0	0	0	0		0	0	0	0	0	0		0	0	0	0	0	0		0	0	0	0	0	0
1486	2018-03-15	1311.3	1311.3	1311.3	1311.3	1311.3	1311.3	1311.3		0	0	0	0	0	0	0	0	0	0	0	0		0	0	0	0	0	0		0	0	0	0	0	0		0	0	0	0	0	0
1487	2018-03-14	1316.8	1316.8	1316.8	1316.8	1316.8	1316.8	1316.8		0	0	0	0	0	0	0	0	0	0	0	0		0	0	0	0	0	0		0	0	0	0	0	0		0	0	0	0	0	0
1488	2018-03-13	1324.4	1324.4	1324.4	1324.4	1324.4	1324.4	1324.4		0	0	0	0	0	0	0	0	0	0	0	0		0	0	0	0	0	0		0	0	0	0	0	0		0	0	0	0	0	0
1489	2018-03-12	1325.9	1109.887	1323.5	1327.167	1325.410	1321.9	1138.456		-216.013	216.013	-2.4	2.4	1.267	1.267	-0.49	0.49	-4	4	-187.444	187.444		46661.6	5.76	1.60529	0.2401	16	35135.3		0.162918	0.00181009	-0.000955577	0.00036956	0.00301682	0.141371		0.162918	0.00181009	0.000955577	0.00036956	0.00301682	0.141371
1490	2018-03-11	1319.4	1319.4	1319.4	1319.4	1319.4	1319.4	1319.4		0	0	0	0	0	0	0	0	0	0	0	0		0	0	0	0	0	0		0	0	0	0	0	0		0	0	0	0	0	0
1491	2018-03-09	1322.4	1322.4	1322.4	1322.4	1322.4	1322.4	1322.4		0	0	0	0	0	0	0	0	0	0	0	0		0	0	0	0	0	0		0	0	0	0	0	0		0	0	0	0	0	0
1492	2018-03-08	1319.9	1319.9	1319.9	1319.9	1319.9	1319.9	1319.9		0	0	0	0	0	0	0	0	0	0	0	0		0	0	0	0	0	0		0	0	0	0	0	0		0	0	0	0	0	0
1493	2018-03-07	1326	1326.0	1326.0	1326.0	1326.0	1326.0	1326.0		0	0	0	0	0	0	0	0	0	0	0	0		0	0	0	0	0	0		0	0	0	0	0	0		0	0	0	0	0	0
1494	2018-03-06	1333.6	1333.6	1333.6	1333.6	1333.6	1333.6	1333.6		0	0	0	0	0	0	0	0	0	0	0	0		0	0	0	0	0	0		0	0	0	0	0	0		0	0	0	0	0	0
1495	2018-03-05	1318.1	1318.1	1318.1	1318.1	1318.1	1318.1	1318.1		0	0	0	0	0	0	0	0	0	0	0	0		0	0	0	0	0	0		0	0	0	0	0	0		0	0	0	0	0	0
1496	2018-03-02	1321.1	1321.1	1321.1	1321.1	1321.1	1321.1	1321.1		0	0	0	0	0	0	0	0	0	0	0	0		0	0	0	0	0	0		0	0	0	0	0	0		0	0	0	0	0	0
1497	2018-03-01	1302.9	1302.9	1302.9	1302.9	1302.9	1302.9	1302.9		0	0	0	0	0	0	0	0	0	0	0	0		0	0	0	0	0	0		0	0	0	0	0	0		0	0	0	0	0	0
1498	2018-02-28	1315.5	1315.5	1315.5	1315.5	1315.5	1315.5	1315.5		0	0	0	0	0	0	0	0	0	0	0	0		0	0	0	0	0	0		0	0	0	0	0	0		0	0	0	0	0	0
1499	2018-02-27	1315.5	1315.5	1315.5	1315.5	1315.5	1315.5	1315.5		0	0	0	0	0	0	0	0	0	0	0	0		0	0	0	0	0	0		0	0	0	0	0	0		0	0	0	0	0	0
1500	2018-02-26	1330.7	1330.7	1330.7	1330.7	1330.7	1330.7	1330.7		0	0	0	0	0	0	0	0	0	0	0	0		0	0	0	0	0	0		0	0	0	0	0	0		0	0	0	0	0	0
1501	2018-02-23	1328.2	1328.2	1328.2	1328.2	1328.2	1328.2	1328.2		0	0	0	0	0	0	0	0	0	0	0	0		0	0	0	0	0	0		0	0	0	0	0	0		0	0	0	0	0	0
1502	2018-02-22	1330.6	1330.6	1330.6	1330.6	1330.6	1330.6	1330.6		0	0	0	0	0	0	0	0	0	0	0	0		0	0	0	0	0	0		0	0	0	0	0	0		0	0	0	0	0	0
1503	2018-02-21	1330	1330.0	1330.0	1330.0	1330.0	1330.0	1330.0		0	0	0	0	0	0	0	0	0	0	0	0		0	0	0	0	0	0		0	0	0	0	0	0		0	0	0	0	0	0
1504	2018-02-20	1328.8	1109.887	1334.592	1334.767	1335.144	1334.640	1139.930		-218.913	218.913	5.792	5.792	5.967	5.967	6.344	6.344	5.84	5.84	-188.87	188.87		47922.9	33.5473	35.6051	40.2463	34.1056	35671.9		0.164745	-0.00435882	-0.00449052	-0.00477423	-0.00439494	0.142136		0.164745	0.00435882	0.00449052	0.00477423	0.00439494	0.142136
1505	2018-02-16	1353.2	1353.2	1353.2	1353.2	1353.2	1353.2	1353.2		0	0	0	0	0	0	0	0	0	0	0	0		0	0	0	0	0	0		0	0	0	0	0	0		0	0	0	0	0	0
1506	2018-02-15	1352.1	1352.1	1352.1	1352.1	1352.1	1352.1	1352.1		0	0	0	0	0	0	0	0	0	0	0	0		0	0	0	0	0	0		0	0	0	0	0	0		0	0	0	0	0	0
1507	2018-02-14	1355.5	1355.5	1355.5	1355.5	1355.5	1355.5	1355.5		0	0	0	0	0	0	0	0	0	0	0	0		0	0	0	0	0	0		0	0	0	0	0	0		0	0	0	0	0	0
1508	2018-02-13	1328.1	1328.1	1328.1	1328.1	1328.1	1328.1	1328.1		0	0	0	0	0	0	0	0	0	0	0	0		0	0	0	0	0	0		0	0	0	0	0	0		0	0	0	0	0	0
1509	2018-02-12	1324.2	1324.2	1324.2	1324.2	1324.2	1324.2	1324.2		0	0	0	0	0	0	0	0	0	0	0	0		0	0	0	0	0	0		0	0	0	0	0	0		0	0	0	0	0	0
1510	2018-02-09	1313.1	1313.1	1313.1	1313.1	1313.1	1313.1	1313.1		0	0	0	0	0	0	0	0	0	0	0	0		0	0	0	0	0	0		0	0	0	0	0	0		0	0	0	0	0	0
1511	2018-02-08	1316.9	1316.9	1316.9	1316.9	1316.9	1316.9	1316.9		0	0	0	0	0	0	0	0	0	0	0	0		0	0	0	0	0	0		0	0	0	0	0	0		0	0	0	0	0	0
1512	2018-02-07	1311.6	1311.6	1311.6	1311.6	1311.6	1311.6	1311.6		0	0	0	0	0	0	0	0	0	0	0	0		0	0	0	0	0	0		0	0	0	0	0	0		0	0	0	0	0	0
1513	2018-02-06	1326.1	1326.1	1326.1	1326.1	1326.1	1326.1	1326.1		0	0	0	0	0	0	0	0	0	0	0	0		0	0	0	0	0	0		0	0	0	0	0	0		0	0	0	0	0	0
1514	2018-02-05	1333	1333.0	1333.0	1333.0	1333.0	1333.0	1333.0		0	0	0	0	0	0	0	0	0	0	0	0		0	0	0	0	0	0		0	0	0	0	0	0		0	0	0	0	0	0
1515	2018-02-02	1333.7	1333.7	1333.7	1333.7	1333.7	1333.7	1333.7		0	0	0	0	0	0	0	0	0	0	0	0		0	0	0	0	0	0		0	0	0	0	0	0		0	0	0	0	0	0
1516	2018-02-01	1344.3	1344.3	1344.3	1344.3	1344.3	1344.3	1344.3		0	0	0	0	0	0	0	0	0	0	0	0		0	0	0	0	0	0		0	0	0	0	0	0		0	0	0	0	0	0
1517	2018-01-31	1339	1339.0	1339.0	1339.0	1339.0	1339.0	1339.0		0	0	0	0	0	0	0	0	0	0	0	0		0	0	0	0	0	0		0	0	0	0	0	0		0	0	0	0	0	0
1518	2018-01-30	1335.4	1335.4	1335.4	1335.4	1335.4	1335.4	1335.4		0	0	0	0	0	0	0	0	0	0	0	0		0	0	0	0	0	0		0	0	0	0	0	0		0	0	0	0	0	0
1519	2018-01-26	1351.6	1351.6	1351.6	1351.6	1351.6	1351.6	1351.6		0	0	0	0	0	0	0	0	0	0	0	0		0	0	0	0	0	0		0	0	0	0	0	0		0	0	0	0	0	0
1520	2018-01-25	1362.4	1109.887	1361.791	1353.433	1358.296	1353.750	1141.101		-252.513	252.513	-0.609	0.609	-8.967	8.967	-4.104	4.104	-8.65	8.65	-221.299	221.299		63762.8	0.370881	80.4071	16.8428	74.8225	48973.2		0.185344	0.000447005	0.00658177	0.00301233	0.00634909	0.162433		0.185344	0.000447005	0.00658177	0.00301233	0.00634909	0.162433
1521	2018-01-24	1355.9	1355.9	1355.9	1355.9	1355.9	1355.9	1355.9		0	0	0	0	0	0	0	0	0	0	0	0		0	0	0	0	0	0		0	0	0	0	0	0		0	0	0	0	0	0
1522	2018-01-23	1335.7	1335.7	1335.7	1335.7	1335.7	1335.7	1335.7		0	0	0	0	0	0	0	0	0	0	0	0		0	0	0	0	0	0		0	0	0	0	0	0		0	0	0	0	0	0
1523	2018-01-22	1330.9	1330.9	1330.9	1330.9	1330.9	1330.9	1330.9		0	0	0	0	0	0	0	0	0	0	0	0		0	0	0	0	0	0		0	0	0	0	0	0		0	0	0	0	0	0
1524	2018-01-19	1331.9	1331.9	1331.9	1331.9	1331.9	1331.9	1331.9		0	0	0	0	0	0	0	0	0	0	0	0		0	0	0	0	0	0		0	0	0	0	0	0		0	0	0	0	0	0
1525	2018-01-18	1326	1326.0	1326.0	1326.0	1326.0	1326.0	1326.0		0	0	0	0	0	0	0	0	0	0	0	0		0	0	0	0	0	0		0	0	0	0	0	0		0	0	0	0	0	0
1526	2018-01-17	1338	1338.0	1338.0	1338.0	1338.0	1338.0	1338.0		0	0	0	0	0	0	0	0	0	0	0	0		0	0	0	0	0	0		0	0	0	0	0	0		0	0	0	0	0	0
1527	2018-01-16	1335.4	1335.4	1335.4	1335.4	1335.4	1335.4	1335.4		0	0	0	0	0	0	0	0	0	0	0	0		0	0	0	0	0	0		0	0	0	0	0	0		0	0	0	0	0	0
1528	2018-01-12	1333.4	1333.4	1333.4	1333.4	1333.4	1333.4	1333.4		0	0	0	0	0	0	0	0	0	0	0	0		0	0	0	0	0	0		0	0	0	0	0	0		0	0	0	0	0	0
1529	2018-01-11	1320.6	1320.6	1320.6	1320.6	1320.6	1320.6	1320.6		0	0	0	0	0	0	0	0	0	0	0	0		0	0	0	0	0	0		0	0	0	0	0	0		0	0	0	0	0	0
1530	2018-01-10	1317.4	1109.887	1319.214	1317.333	1317.590	1316.150	1137.855		-207.513	207.513	1.814	1.814	-0.067	0.067	0.19	0.19	-1.25	1.25	-179.545	179.545		43061.6	3.2906	0.004489	0.0361	1.5625	32236.4		0.157517	-0.00137695	5.08578e-05	-0.000144223	0.000948839	0.136287		0.157517	0.00137695	5.08578e-05	0.000144223	0.000948839	0.136287
1531	2018-01-09	1311.7	1311.7	1311.7	1311.7	1311.7	1311.7	1311.7		0	0	0	0	0	0	0	0	0	0	0	0		0	0	0	0	0	0		0	0	0	0	0	0		0	0	0	0	0	0
1532	2018-01-08	1318.6	1318.6	1318.6	1318.6	1318.6	1318.6	1318.6		0	0	0	0	0	0	0	0	0	0	0	0		0	0	0	0	0	0		0	0	0	0	0	0		0	0	0	0	0	0
1533	2018-01-05	1320.3	1320.3	1320.3	1320.3	1320.3	1320.3	1320.3		0	0	0	0	0	0	0	0	0	0	0	0		0	0	0	0	0	0		0	0	0	0	0	0		0	0	0	0	0	0
1534	2018-01-04	1319.4	1319.4	1319.4	1319.4	1319.4	1319.4	1319.4		0	0	0	0	0	0	0	0	0	0	0	0		0	0	0	0	0	0		0	0	0	0	0	0		0	0	0	0	0	0
1535	2018-01-03	1316.2	1316.2	1316.2	1316.2	1316.2	1316.2	1316.2		0	0	0	0	0	0	0	0	0	0	0	0		0	0	0	0	0	0		0	0	0	0	0	0		0	0	0	0	0	0
1536	2018-01-02	1313.7	1313.7	1313.7	1313.7	1313.7	1313.7	1313.7		0	0	0	0	0	0	0	0	0	0	0	0		0	0	0	0	0	0		0	0	0	0	0	0		0	0	0	0	0	0
1537	2017-12-29	1306.3	1306.3	1306.3	1306.3	1306.3	1306.3	1306.3		0	0	0	0	0	0	0	0	0	0	0	0		0	0	0	0	0	0		0	0	0	0	0	0		0	0	0	0	0	0
1538	2017-12-28	1294.1	1109.887	1288.696	1292.6	1288.469	1296.650	1135.463		-184.213	184.213	-5.404	5.404	-1.5	1.5	-5.631	5.631	2.55	2.55	-158.637	158.637		33934.4	29.2032	2.25	31.7082	6.5025	25165.7		0.142348	0.00417588	0.00115911	0.00435129	-0.00197048	0.122585		0.142348	0.00417588	0.00115911	0.00435129	0.00197048	0.122585
1539	2017-12-27	1287	1287.0	1287.0	1287.0	1287.0	1287.0	1287.0		0	0	0	0	0	0	0	0	0	0	0	0		0	0	0	0	0	0		0	0	0	0	0	0		0	0	0	0	0	0
1540	2017-12-26	1284.1	1284.1	1284.1	1284.1	1284.1	1284.1	1284.1		0	0	0	0	0	0	0	0	0	0	0	0		0	0	0	0	0	0		0	0	0	0	0	0		0	0	0	0	0	0
1541	2017-12-22	1275.4	1275.4	1275.4	1275.4	1275.4	1275.4	1275.4		0	0	0	0	0	0	0	0	0	0	0	0		0	0	0	0	0	0		0	0	0	0	0	0		0	0	0	0	0	0
1542	2017-12-21	1267.3	1267.3	1267.3	1267.3	1267.3	1267.3	1267.3		0	0	0	0	0	0	0	0	0	0	0	0		0	0	0	0	0	0		0	0	0	0	0	0		0	0	0	0	0	0
1543	2017-12-20	1266.1	1266.1	1266.1	1266.1	1266.1	1266.1	1266.1		0	0	0	0	0	0	0	0	0	0	0	0		0	0	0	0	0	0		0	0	0	0	0	0		0	0	0	0	0	0
1544	2017-12-19	1260.7	1260.7	1260.7	1260.7	1260.7	1260.7	1260.7		0	0	0	0	0	0	0	0	0	0	0	0		0	0	0	0	0	0		0	0	0	0	0	0		0	0	0	0	0	0
1545	2017-12-18	1262.2	1262.2	1262.2	1262.2	1262.2	1262.2	1262.2		0	0	0	0	0	0	0	0	0	0	0	0		0	0	0	0	0	0		0	0	0	0	0	0		0	0	0	0	0	0
1546	2017-12-15	1254.3	1254.3	1254.3	1254.3	1254.3	1254.3	1254.3		0	0	0	0	0	0	0	0	0	0	0	0		0	0	0	0	0	0		0	0	0	0	0	0		0	0	0	0	0	0
1547	2017-12-14	1253.8	1253.8	1253.8	1253.8	1253.8	1253.8	1253.8		0	0	0	0	0	0	0	0	0	0	0	0		0	0	0	0	0	0		0	0	0	0	0	0		0	0	0	0	0	0
1548	2017-12-13	1245.4	1245.4	1245.4	1245.4	1245.4	1245.4	1245.4		0	0	0	0	0	0	0	0	0	0	0	0		0	0	0	0	0	0		0	0	0	0	0	0		0	0	0	0	0	0
1549	2017-12-12	1238.5	1238.5	1238.5	1238.5	1238.5	1238.5	1238.5		0	0	0	0	0	0	0	0	0	0	0	0		0	0	0	0	0	0		0	0	0	0	0	0		0	0	0	0	0	0
1550	2017-12-11	1243.7	1243.7	1243.7	1243.7	1243.7	1243.7	1243.7		0	0	0	0	0	0	0	0	0	0	0	0		0	0	0	0	0	0		0	0	0	0	0	0		0	0	0	0	0	0
1551	2017-12-08	1245.2	1245.2	1245.2	1245.2	1245.2	1245.2	1245.2		0	0	0	0	0	0	0	0	0	0	0	0		0	0	0	0	0	0		0	0	0	0	0	0		0	0	0	0	0	0
1552	2017-12-07	1249.8	1249.8	1249.8	1249.8	1249.8	1249.8	1249.8		0	0	0	0	0	0	0	0	0	0	0	0		0	0	0	0	0	0		0	0	0	0	0	0		0	0	0	0	0	0
1553	2017-12-06	1262.8	1262.8	1262.8	1262.8	1262.8	1262.8	1262.8		0	0	0	0	0	0	0	0	0	0	0	0		0	0	0	0	0	0		0	0	0	0	0	0		0	0	0	0	0	0
1554	2017-12-05	1261.6	1261.6	1261.6	1261.6	1261.6	1261.6	1261.6		0	0	0	0	0	0	0	0	0	0	0	0		0	0	0	0	0	0		0	0	0	0	0	0		0	0	0	0	0	0
1555	2017-12-04	1274.3	1274.3	1274.3	1274.3	1274.3	1274.3	1274.3		0	0	0	0	0	0	0	0	0	0	0	0		0	0	0	0	0	0		0	0	0	0	0	0		0	0	0	0	0	0
1556	2017-12-01	1278.8	1278.8	1278.8	1278.8	1278.8	1278.8	1278.8		0	0	0	0	0	0	0	0	0	0	0	0		0	0	0	0	0	0		0	0	0	0	0	0		0	0	0	0	0	0
1557	2017-11-30	1273.2	1273.2	1273.2	1273.2	1273.2	1273.2	1273.2		0	0	0	0	0	0	0	0	0	0	0	0		0	0	0	0	0	0		0	0	0	0	0	0		0	0	0	0	0	0
1558	2017-11-29	1282.1	1282.1	1282.1	1282.1	1282.1	1282.1	1282.1		0	0	0	0	0	0	0	0	0	0	0	0		0	0	0	0	0	0		0	0	0	0	0	0		0	0	0	0	0	0
1559	2017-11-28	1294.7	1294.7	1294.7	1294.7	1294.7	1294.7	1294.7		0	0	0	0	0	0	0	0	0	0	0	0		0	0	0	0	0	0		0	0	0	0	0	0		0	0	0	0	0	0
1560	2017-11-27	1293.8	1293.8	1293.8	1293.8	1293.8	1293.8	1293.8		0	0	0	0	0	0	0	0	0	0	0	0		0	0	0	0	0	0		0	0	0	0	0	0		0	0	0	0	0	0
1561	2017-11-24	1286.7	1286.7	1286.7	1286.7	1286.7	1286.7	1286.7		0	0	0	0	0	0	0	0	0	0	0	0		0	0	0	0	0	0		0	0	0	0	0	0		0	0	0	0	0	0
1562	2017-11-22	1291.6	1291.6	1291.6	1291.6	1291.6	1291.6	1291.6		0	0	0	0	0	0	0	0	0	0	0	0		0	0	0	0	0	0		0	0	0	0	0	0		0	0	0	0	0	0
1563	2017-11-21	1281.1	1281.1	1281.1	1281.1	1281.1	1281.1	1281.1		0	0	0	0	0	0	0	0	0	0	0	0		0	0	0	0	0	0		0	0	0	0	0	0		0	0	0	0	0	0
1564	2017-11-20	1274.6	1274.6	1274.6	1274.6	1274.6	1274.6	1274.6		0	0	0	0	0	0	0	0	0	0	0	0		0	0	0	0	0	0		0	0	0	0	0	0		0	0	0	0	0	0
1565	2017-11-17	1295.8	1295.8	1295.8	1295.8	1295.8	1295.8	1295.8		0	0	0	0	0	0	0	0	0	0	0	0		0	0	0	0	0	0		0	0	0	0	0	0		0	0	0	0	0	0
1566	2017-11-16	1277.4	1277.4	1277.4	1277.4	1277.4	1277.4	1277.4		0	0	0	0	0	0	0	0	0	0	0	0		0	0	0	0	0	0		0	0	0	0	0	0		0	0	0	0	0	0
1567	2017-11-15	1276.5	1276.5	1276.5	1276.5	1276.5	1276.5	1276.5		0	0	0	0	0	0	0	0	0	0	0	0		0	0	0	0	0	0		0	0	0	0	0	0		0	0	0	0	0	0
1568	2017-11-14	1281.5	1281.5	1281.5	1281.5	1281.5	1281.5	1281.5		0	0	0	0	0	0	0	0	0	0	0	0		0	0	0	0	0	0		0	0	0	0	0	0		0	0	0	0	0	0
1569	2017-11-13	1277.3	1277.3	1277.3	1277.3	1277.3	1277.3	1277.3		0	0	0	0	0	0	0	0	0	0	0	0		0	0	0	0	0	0		0	0	0	0	0	0		0	0	0	0	0	0
1570	2017-11-10	1272.4	1272.4	1272.4	1272.4	1272.4	1272.4	1272.4		0	0	0	0	0	0	0	0	0	0	0	0		0	0	0	0	0	0		0	0	0	0	0	0		0	0	0	0	0	0
1571	2017-11-09	1285.6	1285.6	1285.6	1285.6	1285.6	1285.6	1285.6		0	0	0	0	0	0	0	0	0	0	0	0		0	0	0	0	0	0		0	0	0	0	0	0		0	0	0	0	0	0
1572	2017-11-08	1281.6	1281.6	1281.6	1281.6	1281.6	1281.6	1281.6		0	0	0	0	0	0	0	0	0	0	0	0		0	0	0	0	0	0		0	0	0	0	0	0		0	0	0	0	0	0
1573	2017-11-07	1273.7	1273.7	1273.7	1273.7	1273.7	1273.7	1273.7		0	0	0	0	0	0	0	0	0	0	0	0		0	0	0	0	0	0		0	0	0	0	0	0		0	0	0	0	0	0
1574	2017-11-06	1279.4	1279.4	1279.4	1279.4	1279.4	1279.4	1279.4		0	0	0	0	0	0	0	0	0	0	0	0		0	0	0	0	0	0		0	0	0	0	0	0		0	0	0	0	0	0
1575	2017-11-02	1266.5	1266.5	1266.5	1266.5	1266.5	1266.5	1266.5		0	0	0	0	0	0	0	0	0	0	0	0		0	0	0	0	0	0		0	0	0	0	0	0		0	0	0	0	0	0
1576	2017-11-01	1274.9	1274.9	1274.9	1274.9	1274.9	1274.9	1274.9		0	0	0	0	0	0	0	0	0	0	0	0		0	0	0	0	0	0		0	0	0	0	0	0		0	0	0	0	0	0
1577	2017-10-31	1274.1	1274.1	1274.1	1274.1	1274.1	1274.1	1274.1		0	0	0	0	0	0	0	0	0	0	0	0		0	0	0	0	0	0		0	0	0	0	0	0		0	0	0	0	0	0
1578	2017-10-30	1267	1109.887	1273.175	1267.667	1274.117	1274.1	1133.952		-157.113	157.113	6.175	6.175	0.667	0.667	7.117	7.117	7.1	7.1	-133.048	133.048		24684.5	38.1306	0.444889	50.6517	50.41	17701.8		0.124004	-0.00487372	-0.00052644	-0.00561721	-0.00560379	0.10501		0.124004	0.00487372	0.00052644	0.00561721	0.00560379	0.10501
1579	2017-10-29	1274.1	1274.1	1274.1	1274.1	1274.1	1274.1	1274.1		0	0	0	0	0	0	0	0	0	0	0	0		0	0	0	0	0	0		0	0	0	0	0	0		0	0	0	0	0	0
1580	2017-10-27	1268.5	1268.5	1268.5	1268.5	1268.5	1268.5	1268.5		0	0	0	0	0	0	0	0	0	0	0	0		0	0	0	0	0	0		0	0	0	0	0	0		0	0	0	0	0	0
1581	2017-10-25	1266.3	1266.3	1266.3	1266.3	1266.3	1266.3	1266.3		0	0	0	0	0	0	0	0	0	0	0	0		0	0	0	0	0	0		0	0	0	0	0	0		0	0	0	0	0	0
1582	2017-10-24	1275.4	1275.4	1275.4	1275.4	1275.4	1275.4	1275.4		0	0	0	0	0	0	0	0	0	0	0	0		0	0	0	0	0	0		0	0	0	0	0	0		0	0	0	0	0	0
1583	2017-10-23	1275	1275.0	1275.0	1275.0	1275.0	1275.0	1275.0		0	0	0	0	0	0	0	0	0	0	0	0		0	0	0	0	0	0		0	0	0	0	0	0		0	0	0	0	0	0
1584	2017-10-22	1277.7	1109.887	1275.040	1278.033	1275.119	1275.6	1134.299		-167.813	167.813	-2.66	2.66	0.333	0.333	-2.581	2.581	-2.1	2.1	-143.401	143.401		28161.2	7.0756	0.110889	6.66156	4.41	20563.8		0.13134	0.00208187	-0.000260625	0.00202004	0.00164358	0.112234		0.13134	0.00208187	0.000260625	0.00202004	0.00164358	0.112234
1585	2017-10-19	1277.4	1277.4	1277.4	1277.4	1277.4	1277.4	1277.4		0	0	0	0	0	0	0	0	0	0	0	0		0	0	0	0	0	0		0	0	0	0	0	0		0	0	0	0	0	0
1586	2017-10-18	1286.9	1286.9	1286.9	1286.9	1286.9	1286.9	1286.9		0	0	0	0	0	0	0	0	0	0	0	0		0	0	0	0	0	0		0	0	0	0	0	0		0	0	0	0	0	0
1587	2017-10-17	1279.9	1279.9	1279.9	1279.9	1279.9	1279.9	1279.9		0	0	0	0	0	0	0	0	0	0	0	0		0	0	0	0	0	0		0	0	0	0	0	0		0	0	0	0	0	0
1588	2017-10-16	1283	1283.0	1283.0	1283.0	1283.0	1283.0	1283.0		0	0	0	0	0	0	0	0	0	0	0	0		0	0	0	0	0	0		0	0	0	0	0	0		0	0	0	0	0	0
1589	2017-10-15	1299.9	1299.9	1299.9	1299.9	1299.9	1299.9	1299.9		0	0	0	0	0	0	0	0	0	0	0	0		0	0	0	0	0	0		0	0	0	0	0	0		0	0	0	0	0	0
1590	2017-10-12	1301.5	1301.5	1301.5	1301.5	1301.5	1301.5	1301.5		0	0	0	0	0	0	0	0	0	0	0	0		0	0	0	0	0	0		0	0	0	0	0	0		0	0	0	0	0	0
1591	2017-10-11	1293.3	1293.3	1293.3	1293.3	1293.3	1293.3	1293.3		0	0	0	0	0	0	0	0	0	0	0	0		0	0	0	0	0	0		0	0	0	0	0	0		0	0	0	0	0	0
1592	2017-10-10	1285.8	1285.8	1285.8	1285.8	1285.8	1285.8	1285.8		0	0	0	0	0	0	0	0	0	0	0	0		0	0	0	0	0	0		0	0	0	0	0	0		0	0	0	0	0	0
1593	2017-10-09	1290.6	1290.6	1290.6	1290.6	1290.6	1290.6	1290.6		0	0	0	0	0	0	0	0	0	0	0	0		0	0	0	0	0	0		0	0	0	0	0	0		0	0	0	0	0	0
1594	2017-10-08	1281.8	1281.8	1281.8	1281.8	1281.8	1281.8	1281.8		0	0	0	0	0	0	0	0	0	0	0	0		0	0	0	0	0	0		0	0	0	0	0	0		0	0	0	0	0	0
1595	2017-10-05	1271.6	1109.887	1264.096	1270.467	1268.580	1272.875	1133.594		-161.713	161.713	-7.504	7.504	-1.133	1.133	-3.02	3.02	1.275	1.275	-138.006	138.006		26151.1	56.31	1.28369	9.1204	1.62563	19045.7		0.127173	0.00590123	0.000891003	0.00237496	-0.00100267	0.108529		0.127173	0.00590123	0.000891003	0.00237496	0.00100267	0.108529
1596	2017-10-04	1269.9	1269.9	1269.9	1269.9	1269.9	1269.9	1269.9		0	0	0	0	0	0	0	0	0	0	0	0		0	0	0	0	0	0		0	0	0	0	0	0		0	0	0	0	0	0
1597	2017-10-03	1273.7	1109.887	1275.040	1278.667	1275.863	1270.7	1134.235		-163.813	163.813	1.34	1.34	4.967	4.967	2.163	2.163	-3	3	-139.465	139.465		26834.7	1.7956	24.6711	4.67857	9	19450.5		0.128612	-0.00105205	-0.00389966	-0.0016982	0.00235534	0.109496		0.128612	0.00105205	0.00389966	0.0016982	0.00235534	0.109496
1598	2017-10-02	1271.5	1271.5	1271.5	1271.5	1271.5	1271.5	1271.5		0	0	0	0	0	0	0	0	0	0	0	0		0	0	0	0	0	0		0	0	0	0	0	0		0	0	0	0	0	0
1599	2017-10-01	1272.7	1272.7	1272.7	1272.7	1272.7	1272.7	1272.7		0	0	0	0	0	0	0	0	0	0	0	0		0	0	0	0	0	0		0	0	0	0	0	0		0	0	0	0	0	0
1600	2017-09-28	1281.5	1281.5	1281.5	1281.5	1281.5	1281.5	1281.5		0	0	0	0	0	0	0	0	0	0	0	0		0	0	0	0	0	0		0	0	0	0	0	0		0	0	0	0	0	0
1601	2017-09-27	1285.5	1285.5	1285.5	1285.5	1285.5	1285.5	1285.5		0	0	0	0	0	0	0	0	0	0	0	0		0	0	0	0	0	0		0	0	0	0	0	0		0	0	0	0	0	0
1602	2017-09-26	1283.4	1109.887	1283.571	1283.2	1283.856	1291.250	1134.916		-173.513	173.513	0.171	0.171	-0.2	0.2	0.456	0.456	7.85	7.85	-148.484	148.484		30106.8	0.029241	0.04	0.207936	61.6225	22047.5		0.135198	-0.00013324	0.000155836	-0.000355306	-0.00611657	0.115696		0.135198	0.00013324	0.000155836	0.000355306	0.00611657	0.115696
1603	2017-09-25	1297	1297.0	1297.0	1297.0	1297.0	1297.0	1297.0		0	0	0	0	0	0	0	0	0	0	0	0		0	0	0	0	0	0		0	0	0	0	0	0		0	0	0	0	0	0
1604	2017-09-24	1306.8	1109.887	1299.885	1307.233	1304.142	1296.075	1136.083		-196.913	196.913	-6.915	6.915	0.433	0.433	-2.658	2.658	-10.725	10.725	-170.717	170.717		38774.7	47.8172	0.187489	7.06496	115.026	29144.3		0.150683	0.00529155	-0.000331344	0.00203398	0.00820707	0.130637		0.150683	0.00529155	0.000331344	0.00203398	0.00820707	0.130637
1605	2017-09-21	1293.3	1293.3	1293.3	1293.3	1293.3	1293.3	1293.3		0	0	0	0	0	0	0	0	0	0	0	0		0	0	0	0	0	0		0	0	0	0	0	0		0	0	0	0	0	0
1606	2017-09-20	1290.6	1290.6	1290.6	1290.6	1290.6	1290.6	1290.6		0	0	0	0	0	0	0	0	0	0	0	0		0	0	0	0	0	0		0	0	0	0	0	0		0	0	0	0	0	0
1607	2017-09-19	1312	1109.887	1299.885	1303.967	1299.181	1298.4	1136.900		-202.113	202.113	-12.115	12.115	-8.033	8.033	-12.819	12.819	-13.6	13.6	-175.1	175.1		40849.7	146.773	64.5291	164.327	184.96	30660		0.15405	0.00923399	0.00612271	0.00977058	0.0103659	0.13346		0.15405	0.00923399	0.00612271	0.00977058	0.0103659	0.13346
1608	2017-09-18	1306.2	1306.2	1306.2	1306.2	1306.2	1306.2	1306.2		0	0	0	0	0	0	0	0	0	0	0	0		0	0	0	0	0	0		0	0	0	0	0	0		0	0	0	0	0	0
1609	2017-09-17	1306.3	1306.3	1306.3	1306.3	1306.3	1306.3	1306.3		0	0	0	0	0	0	0	0	0	0	0	0		0	0	0	0	0	0		0	0	0	0	0	0		0	0	0	0	0	0
1610	2017-09-14	1320.4	1320.4	1320.4	1320.4	1320.4	1320.4	1320.4		0	0	0	0	0	0	0	0	0	0	0	0		0	0	0	0	0	0		0	0	0	0	0	0		0	0	0	0	0	0
1611	2017-09-13	1324.7	1324.7	1324.7	1324.7	1324.7	1324.7	1324.7		0	0	0	0	0	0	0	0	0	0	0	0		0	0	0	0	0	0		0	0	0	0	0	0		0	0	0	0	0	0
1612	2017-09-12	1323.4	1323.4	1323.4	1323.4	1323.4	1323.4	1323.4		0	0	0	0	0	0	0	0	0	0	0	0		0	0	0	0	0	0		0	0	0	0	0	0		0	0	0	0	0	0
1613	2017-09-11	1328	1328.0	1328.0	1328.0	1328.0	1328.0	1328.0		0	0	0	0	0	0	0	0	0	0	0	0		0	0	0	0	0	0		0	0	0	0	0	0		0	0	0	0	0	0
1614	2017-09-10	1331	1331.0	1331.0	1331.0	1331.0	1331.0	1331.0		0	0	0	0	0	0	0	0	0	0	0	0		0	0	0	0	0	0		0	0	0	0	0	0		0	0	0	0	0	0
1615	2017-09-07	1346	1346.0	1346.0	1346.0	1346.0	1346.0	1346.0		0	0	0	0	0	0	0	0	0	0	0	0		0	0	0	0	0	0		0	0	0	0	0	0		0	0	0	0	0	0
1616	2017-09-06	1345.1	1345.1	1345.1	1345.1	1345.1	1345.1	1345.1		0	0	0	0	0	0	0	0	0	0	0	0		0	0	0	0	0	0		0	0	0	0	0	0		0	0	0	0	0	0
1617	2017-09-05	1333.9	1333.9	1333.9	1333.9	1333.9	1333.9	1333.9		0	0	0	0	0	0	0	0	0	0	0	0		0	0	0	0	0	0		0	0	0	0	0	0		0	0	0	0	0	0
1618	2017-09-04	1339.2	1339.2	1339.2	1339.2	1339.2	1339.2	1339.2		0	0	0	0	0	0	0	0	0	0	0	0		0	0	0	0	0	0		0	0	0	0	0	0		0	0	0	0	0	0
1619	2017-08-31	1324.5	1324.5	1324.5	1324.5	1324.5	1324.5	1324.5		0	0	0	0	0	0	0	0	0	0	0	0		0	0	0	0	0	0		0	0	0	0	0	0		0	0	0	0	0	0
1620	2017-08-30	1316.2	1316.2	1316.2	1316.2	1316.2	1316.2	1316.2		0	0	0	0	0	0	0	0	0	0	0	0		0	0	0	0	0	0		0	0	0	0	0	0		0	0	0	0	0	0
1621	2017-08-29	1308.1	1308.1	1308.1	1308.1	1308.1	1308.1	1308.1		0	0	0	0	0	0	0	0	0	0	0	0		0	0	0	0	0	0		0	0	0	0	0	0		0	0	0	0	0	0
1622	2017-08-28	1313.1	1313.1	1313.1	1313.1	1313.1	1313.1	1313.1		0	0	0	0	0	0	0	0	0	0	0	0		0	0	0	0	0	0		0	0	0	0	0	0		0	0	0	0	0	0
1623	2017-08-27	1309.7	1309.7	1309.7	1309.7	1309.7	1309.7	1309.7		0	0	0	0	0	0	0	0	0	0	0	0		0	0	0	0	0	0		0	0	0	0	0	0		0	0	0	0	0	0
1624	2017-08-24	1292.5	1109.887	1288.696	1290.333	1289.692	1292.3	1135.135		-182.613	182.613	-3.804	3.804	-2.167	2.167	-2.808	2.808	-0.2	0.2	-157.365	157.365		33347.5	14.4704	4.69589	7.88486	0.04	24763.7		0.141287	0.00294313	0.0016766	0.00217253	0.000154739	0.121752		0.141287	0.00294313	0.0016766	0.00217253	0.000154739	0.121752
1625	2017-08-23	1286.5	1286.5	1286.5	1286.5	1286.5	1286.5	1286.5		0	0	0	0	0	0	0	0	0	0	0	0		0	0	0	0	0	0		0	0	0	0	0	0		0	0	0	0	0	0
1626	2017-08-22	1288.9	1288.9	1288.9	1288.9	1288.9	1288.9	1288.9		0	0	0	0	0	0	0	0	0	0	0	0		0	0	0	0	0	0		0	0	0	0	0	0		0	0	0	0	0	0
1627	2017-08-21	1285.1	1285.1	1285.1	1285.1	1285.1	1285.1	1285.1		0	0	0	0	0	0	0	0	0	0	0	0		0	0	0	0	0	0		0	0	0	0	0	0		0	0	0	0	0	0
1628	2017-08-20	1290.8	1290.8	1290.8	1290.8	1290.8	1290.8	1290.8		0	0	0	0	0	0	0	0	0	0	0	0		0	0	0	0	0	0		0	0	0	0	0	0		0	0	0	0	0	0
1629	2017-08-17	1285.7	1285.7	1285.7	1285.7	1285.7	1285.7	1285.7		0	0	0	0	0	0	0	0	0	0	0	0		0	0	0	0	0	0		0	0	0	0	0	0		0	0	0	0	0	0
1630	2017-08-16	1286.4	1286.4	1286.4	1286.4	1286.4	1286.4	1286.4		0	0	0	0	0	0	0	0	0	0	0	0		0	0	0	0	0	0		0	0	0	0	0	0		0	0	0	0	0	0
1631	2017-08-15	1276.9	1276.9	1276.9	1276.9	1276.9	1276.9	1276.9		0	0	0	0	0	0	0	0	0	0	0	0		0	0	0	0	0	0		0	0	0	0	0	0		0	0	0	0	0	0
1632	2017-08-14	1273.7	1273.7	1273.7	1273.7	1273.7	1273.7	1273.7		0	0	0	0	0	0	0	0	0	0	0	0		0	0	0	0	0	0		0	0	0	0	0	0		0	0	0	0	0	0
1633	2017-08-13	1284.2	1109.887	1285.603	1282.1	1284.404	1277.2	1135.060		-174.313	174.313	1.403	1.403	-2.1	2.1	0.204	0.204	-7	7	-149.14	149.14		30385	1.96841	4.41	0.041616	49	22242.7		0.135737	-0.00109251	0.00163526	-0.000158854	0.00545086	0.116135		0.135737	0.00109251	0.00163526	0.000158854	0.00545086	0.116135
1634	2017-08-10	1287.7	1287.7	1287.7	1287.7	1287.7	1287.7	1287.7		0	0	0	0	0	0	0	0	0	0	0	0		0	0	0	0	0	0		0	0	0	0	0	0		0	0	0	0	0	0
1635	2017-08-09	1283.7	1283.7	1283.7	1283.7	1283.7	1283.7	1283.7		0	0	0	0	0	0	0	0	0	0	0	0		0	0	0	0	0	0		0	0	0	0	0	0		0	0	0	0	0	0
1636	2017-08-08	1273	1273.0	1273.0	1273.0	1273.0	1273.0	1273.0		0	0	0	0	0	0	0	0	0	0	0	0		0	0	0	0	0	0		0	0	0	0	0	0		0	0	0	0	0	0
1637	2017-08-07	1256.4	1256.4	1256.4	1256.4	1256.4	1256.4	1256.4		0	0	0	0	0	0	0	0	0	0	0	0		0	0	0	0	0	0		0	0	0	0	0	0		0	0	0	0	0	0
1638	2017-08-06	1258.2	1109.887	1257.282	1256.033	1255.425	1256.875	1132.898		-148.313	148.313	-0.918	0.918	-2.167	2.167	-2.775	2.775	-1.325	1.325	-125.302	125.302		21996.7	0.842724	4.69589	7.70063	1.75563	15700.6		0.117877	0.000729614	0.0017223	0.00220553	0.00105309	0.0995883		0.117877	0.000729614	0.0017223	0.00220553	0.00105309	0.0995883
1639	2017-08-03	1258.3	1258.3	1258.3	1258.3	1258.3	1258.3	1258.3		0	0	0	0	0	0	0	0	0	0	0	0		0	0	0	0	0	0		0	0	0	0	0	0		0	0	0	0	0	0
1640	2017-08-02	1267.8	1267.8	1267.8	1267.8	1267.8	1267.8	1267.8		0	0	0	0	0	0	0	0	0	0	0	0		0	0	0	0	0	0		0	0	0	0	0	0		0	0	0	0	0	0
1641	2017-08-01	1271.8	1271.8	1271.8	1271.8	1271.8	1271.8	1271.8		0	0	0	0	0	0	0	0	0	0	0	0		0	0	0	0	0	0		0	0	0	0	0	0		0	0	0	0	0	0
1642	2017-07-31	1272.6	1272.6	1272.6	1272.6	1272.6	1272.6	1272.6		0	0	0	0	0	0	0	0	0	0	0	0		0	0	0	0	0	0		0	0	0	0	0	0		0	0	0	0	0	0
1643	2017-07-30	1266.6	1266.6	1266.6	1266.6	1266.6	1266.6	1266.6		0	0	0	0	0	0	0	0	0	0	0	0		0	0	0	0	0	0		0	0	0	0	0	0		0	0	0	0	0	0
1644	2017-07-27	1268.4	1268.4	1268.4	1268.4	1268.4	1268.4	1268.4		0	0	0	0	0	0	0	0	0	0	0	0		0	0	0	0	0	0		0	0	0	0	0	0		0	0	0	0	0	0
1645	2017-07-26	1259.6	1259.6	1259.6	1259.6	1259.6	1259.6	1259.6		0	0	0	0	0	0	0	0	0	0	0	0		0	0	0	0	0	0		0	0	0	0	0	0		0	0	0	0	0	0
1646	2017-07-25	1249	1249.0	1249.0	1249.0	1249.0	1249.0	1249.0		0	0	0	0	0	0	0	0	0	0	0	0		0	0	0	0	0	0		0	0	0	0	0	0		0	0	0	0	0	0
1647	2017-07-24	1251.7	1251.7	1251.7	1251.7	1251.7	1251.7	1251.7		0	0	0	0	0	0	0	0	0	0	0	0		0	0	0	0	0	0		0	0	0	0	0	0		0	0	0	0	0	0
1648	2017-07-23	1253.9	1253.9	1253.9	1253.9	1253.9	1253.9	1253.9		0	0	0	0	0	0	0	0	0	0	0	0		0	0	0	0	0	0		0	0	0	0	0	0		0	0	0	0	0	0
1649	2017-07-20	1254.3	1254.3	1254.3	1254.3	1254.3	1254.3	1254.3		0	0	0	0	0	0	0	0	0	0	0	0		0	0	0	0	0	0		0	0	0	0	0	0		0	0	0	0	0	0
1650	2017-07-19	1244.8	1244.8	1244.8	1244.8	1244.8	1244.8	1244.8		0	0	0	0	0	0	0	0	0	0	0	0		0	0	0	0	0	0		0	0	0	0	0	0		0	0	0	0	0	0
1651	2017-07-18	1241.2	1241.2	1241.2	1241.2	1241.2	1241.2	1241.2		0	0	0	0	0	0	0	0	0	0	0	0		0	0	0	0	0	0		0	0	0	0	0	0		0	0	0	0	0	0
1652	2017-07-17	1241.1	1241.1	1241.1	1241.1	1241.1	1241.1	1241.1		0	0	0	0	0	0	0	0	0	0	0	0		0	0	0	0	0	0		0	0	0	0	0	0		0	0	0	0	0	0
1653	2017-07-16	1232.8	1232.8	1232.8	1232.8	1232.8	1232.8	1232.8		0	0	0	0	0	0	0	0	0	0	0	0		0	0	0	0	0	0		0	0	0	0	0	0		0	0	0	0	0	0
1654	2017-07-13	1226.6	1109.887	1225.235	1225.533	1224.800	1220.425	1130.014		-116.713	116.713	-1.365	1.365	-1.067	1.067	-1.8	1.8	-6.175	6.175	-96.586	96.586		13621.9	1.86323	1.13849	3.24	38.1306	9328.86		0.0951516	0.00111283	0.000869884	0.00146747	0.00503424	0.0787429		0.0951516	0.00111283	0.000869884	0.00146747	0.00503424	0.0787429
1655	2017-07-12	1216.3	1216.3	1216.3	1216.3	1216.3	1216.3	1216.3		0	0	0	0	0	0	0	0	0	0	0	0		0	0	0	0	0	0		0	0	0	0	0	0		0	0	0	0	0	0
1656	2017-07-11	1218.1	1218.1	1218.1	1218.1	1218.1	1218.1	1218.1		0	0	0	0	0	0	0	0	0	0	0	0		0	0	0	0	0	0		0	0	0	0	0	0		0	0	0	0	0	0
1657	2017-07-10	1213.6	1109.887	1212.512	1210.7	1210.762	1215.1	1129.414		-103.713	103.713	-1.088	1.088	-2.9	2.9	-2.838	2.838	1.5	1.5	-84.186	84.186		10756.4	1.18374	8.41	8.05424	2.25	7087.28		0.085459	0.000896506	0.00238958	0.0023385	-0.00123599	0.0693688		0.085459	0.000896506	0.00238958	0.0023385	0.00123599	0.0693688
1658	2017-07-09	1212.1	1212.1	1212.1	1212.1	1212.1	1212.1	1212.1		0	0	0	0	0	0	0	0	0	0	0	0		0	0	0	0	0	0		0	0	0	0	0	0		0	0	0	0	0	0
1659	2017-07-06	1208.6	1208.6	1208.6	1208.6	1208.6	1208.6	1208.6		0	0	0	0	0	0	0	0	0	0	0	0		0	0	0	0	0	0		0	0	0	0	0	0		0	0	0	0	0	0
1660	2017-07-05	1222.2	1222.2	1222.2	1222.2	1222.2	1222.2	1222.2		0	0	0	0	0	0	0	0	0	0	0	0		0	0	0	0	0	0		0	0	0	0	0	0		0	0	0	0	0	0
1661	2017-07-04	1220.4	1109.887	1222.306	1222.267	1222.092	1220.050	1130.194		-110.513	110.513	1.906	1.906	1.867	1.867	1.692	1.692	-0.35	0.35	-90.206	90.206		12213.1	3.63284	3.48569	2.86286	0.1225	8137.12		0.0905547	-0.00156178	-0.00152983	-0.00138643	0.000286791	0.0739151		0.0905547	0.00156178	0.00152983	0.00138643	0.000286791	0.0739151
1662	2017-07-03	1217.9	1217.9	1217.9	1217.9	1217.9	1217.9	1217.9		0	0	0	0	0	0	0	0	0	0	0	0		0	0	0	0	0	0		0	0	0	0	0	0		0	0	0	0	0	0
1663	2017-06-29	1240.7	1240.7	1240.7	1240.7	1240.7	1240.7	1240.7		0	0	0	0	0	0	0	0	0	0	0	0		0	0	0	0	0	0		0	0	0	0	0	0		0	0	0	0	0	0
1664	2017-06-28	1244.2	1244.2	1244.2	1244.2	1244.2	1244.2	1244.2		0	0	0	0	0	0	0	0	0	0	0	0		0	0	0	0	0	0		0	0	0	0	0	0		0	0	0	0	0	0
1665	2017-06-27	1248	1109.887	1247.982	1248.9	1246.890	1245.3	1132.184		-138.113	138.113	-0.018	0.018	0.9	0.9	-1.11	1.11	-2.7	2.7	-115.816	115.816		19075.2	0.000324	0.81	1.2321	7.29	13413.3		0.110667	1.44231e-05	-0.000721154	0.000889423	0.00216346	0.0928013		0.110667	1.44231e-05	0.000721154	0.000889423	0.00216346	0.0928013
1666	2017-06-26	1246.4	1246.4	1246.4	1246.4	1246.4	1246.4	1246.4		0	0	0	0	0	0	0	0	0	0	0	0		0	0	0	0	0	0		0	0	0	0	0	0		0	0	0	0	0	0
1667	2017-06-25	1246.3	1246.3	1246.3	1246.3	1246.3	1246.3	1246.3		0	0	0	0	0	0	0	0	0	0	0	0		0	0	0	0	0	0		0	0	0	0	0	0		0	0	0	0	0	0
1668	2017-06-22	1256.2	1256.2	1256.2	1256.2	1256.2	1256.2	1256.2		0	0	0	0	0	0	0	0	0	0	0	0		0	0	0	0	0	0		0	0	0	0	0	0		0	0	0	0	0	0
1669	2017-06-21	1247.6	1247.6	1247.6	1247.6	1247.6	1247.6	1247.6		0	0	0	0	0	0	0	0	0	0	0	0		0	0	0	0	0	0		0	0	0	0	0	0		0	0	0	0	0	0
1670	2017-06-20	1243.4	1243.4	1243.4	1243.4	1243.4	1243.4	1243.4		0	0	0	0	0	0	0	0	0	0	0	0		0	0	0	0	0	0		0	0	0	0	0	0		0	0	0	0	0	0
1671	2017-06-19	1241	1241.0	1241.0	1241.0	1241.0	1241.0	1241.0		0	0	0	0	0	0	0	0	0	0	0	0		0	0	0	0	0	0		0	0	0	0	0	0		0	0	0	0	0	0
1672	2017-06-18	1244.2	1244.2	1244.2	1244.2	1244.2	1244.2	1244.2		0	0	0	0	0	0	0	0	0	0	0	0		0	0	0	0	0	0		0	0	0	0	0	0		0	0	0	0	0	0
1673	2017-06-15	1254	1254.0	1254.0	1254.0	1254.0	1254.0	1254.0		0	0	0	0	0	0	0	0	0	0	0	0		0	0	0	0	0	0		0	0	0	0	0	0		0	0	0	0	0	0
1674	2017-06-14	1252.2	1252.2	1252.2	1252.2	1252.2	1252.2	1252.2		0	0	0	0	0	0	0	0	0	0	0	0		0	0	0	0	0	0		0	0	0	0	0	0		0	0	0	0	0	0
1675	2017-06-13	1272.8	1109.887	1271.431	1266.967	1273.010	1259.0	1133.698		-162.913	162.913	-1.369	1.369	-5.833	5.833	0.21	0.21	-13.8	13.8	-139.102	139.102		26540.6	1.87416	34.0239	0.0441	190.44	19349.4		0.127996	0.00107558	0.00458281	-0.000164991	0.0108422	0.109288		0.127996	0.00107558	0.00458281	0.000164991	0.0108422	0.109288
1676	2017-06-12	1265.8	1265.8	1265.8	1265.8	1265.8	1265.8	1265.8		0	0	0	0	0	0	0	0	0	0	0	0		0	0	0	0	0	0		0	0	0	0	0	0		0	0	0	0	0	0
1677	2017-06-11	1266.1	1266.1	1266.1	1266.1	1266.1	1266.1	1266.1		0	0	0	0	0	0	0	0	0	0	0	0		0	0	0	0	0	0		0	0	0	0	0	0		0	0	0	0	0	0
1678	2017-06-08	1268.5	1109.887	1265.550	1270.433	1269.927	1273.750	1134.124		-158.613	158.613	-2.95	2.95	1.933	1.933	1.427	1.427	5.25	5.25	-134.376	134.376		25158.1	8.7025	3.73649	2.03633	27.5625	18056.9		0.12504	0.00232558	-0.00152385	-0.00112495	-0.00413875	0.105933		0.12504	0.00232558	0.00152385	0.00112495	0.00413875	0.105933
1679	2017-06-07	1276.3	1276.3	1276.3	1276.3	1276.3	1276.3	1276.3		0	0	0	0	0	0	0	0	0	0	0	0		0	0	0	0	0	0		0	0	0	0	0	0		0	0	0	0	0	0
1680	2017-06-06	1290.1	1109.887	1288.696	1288.067	1288.439	1285.350	1135.422		-180.213	180.213	-1.404	1.404	-2.033	2.033	-1.661	1.661	-4.75	4.75	-154.678	154.678		32476.7	1.97122	4.13309	2.75892	22.5625	23925.3		0.139689	0.00108829	0.00157585	0.0012875	0.00368189	0.119896		0.139689	0.00108829	0.00157585	0.0012875	0.00368189	0.119896
1681	2017-06-05	1294.4	1294.4	1294.4	1294.4	1294.4	1294.4	1294.4		0	0	0	0	0	0	0	0	0	0	0	0		0	0	0	0	0	0		0	0	0	0	0	0		0	0	0	0	0	0
1682	2017-06-04	1279.3	1279.3	1279.3	1279.3	1279.3	1279.3	1279.3		0	0	0	0	0	0	0	0	0	0	0	0		0	0	0	0	0	0		0	0	0	0	0	0		0	0	0	0	0	0
1683	2017-06-01	1276.8	1276.8	1276.8	1276.8	1276.8	1276.8	1276.8		0	0	0	0	0	0	0	0	0	0	0	0		0	0	0	0	0	0		0	0	0	0	0	0		0	0	0	0	0	0
1684	2017-05-31	1267	1267.0	1267.0	1267.0	1267.0	1267.0	1267.0		0	0	0	0	0	0	0	0	0	0	0	0		0	0	0	0	0	0		0	0	0	0	0	0		0	0	0	0	0	0
1685	2017-05-30	1272	1272.0	1272.0	1272.0	1272.0	1272.0	1272.0		0	0	0	0	0	0	0	0	0	0	0	0		0	0	0	0	0	0		0	0	0	0	0	0		0	0	0	0	0	0
1686	2017-05-29	1262.1	1262.1	1262.1	1262.1	1262.1	1262.1	1262.1		0	0	0	0	0	0	0	0	0	0	0	0		0	0	0	0	0	0		0	0	0	0	0	0		0	0	0	0	0	0
1687	2017-05-25	1267.6	1267.6	1267.6	1267.6	1267.6	1267.6	1267.6		0	0	0	0	0	0	0	0	0	0	0	0		0	0	0	0	0	0		0	0	0	0	0	0		0	0	0	0	0	0
1688	2017-05-24	1255.8	1255.8	1255.8	1255.8	1255.8	1255.8	1255.8		0	0	0	0	0	0	0	0	0	0	0	0		0	0	0	0	0	0		0	0	0	0	0	0		0	0	0	0	0	0
1689	2017-05-23	1252.4	1109.887	1252.348	1254.433	1253.757	1255.3	1132.548		-142.513	142.513	-0.052	0.052	2.033	2.033	1.357	1.357	2.9	2.9	-119.852	119.852		20310	0.002704	4.13309	1.84145	8.41	14364.5		0.113792	4.15203e-05	-0.00162328	-0.00108352	-0.00231555	0.0956979		0.113792	4.15203e-05	0.00162328	0.00108352	0.00231555	0.0956979
1690	2017-05-22	1254.8	1254.8	1254.8	1254.8	1254.8	1254.8	1254.8		0	0	0	0	0	0	0	0	0	0	0	0		0	0	0	0	0	0		0	0	0	0	0	0		0	0	0	0	0	0
1691	2017-05-21	1260.7	1260.7	1260.7	1260.7	1260.7	1260.7	1260.7		0	0	0	0	0	0	0	0	0	0	0	0		0	0	0	0	0	0		0	0	0	0	0	0		0	0	0	0	0	0
1692	2017-05-18	1252.7	1252.7	1252.7	1252.7	1252.7	1252.7	1252.7		0	0	0	0	0	0	0	0	0	0	0	0		0	0	0	0	0	0		0	0	0	0	0	0		0	0	0	0	0	0
1693	2017-05-17	1251.7	1251.7	1251.7	1251.7	1251.7	1251.7	1251.7		0	0	0	0	0	0	0	0	0	0	0	0		0	0	0	0	0	0		0	0	0	0	0	0		0	0	0	0	0	0
1694	2017-05-16	1257.5	1257.5	1257.5	1257.5	1257.5	1257.5	1257.5		0	0	0	0	0	0	0	0	0	0	0	0		0	0	0	0	0	0		0	0	0	0	0	0		0	0	0	0	0	0
1695	2017-05-15	1235	1235.0	1235.0	1235.0	1235.0	1235.0	1235.0		0	0	0	0	0	0	0	0	0	0	0	0		0	0	0	0	0	0		0	0	0	0	0	0		0	0	0	0	0	0
1696	2017-05-14	1228.6	1109.887	1229.723	1229.433	1229.858	1232.8	1130.759		-118.713	118.713	1.123	1.123	0.833	0.833	1.258	1.258	4.2	4.2	-97.841	97.841		14092.8	1.26113	0.693889	1.58256	17.64	9572.86		0.0966246	-0.000914049	-0.000678007	-0.00102393	-0.00341853	0.0796362		0.0966246	0.000914049	0.000678007	0.00102393	0.00341853	0.0796362
1697	2017-05-11	1226.2	1226.2	1226.2	1226.2	1226.2	1226.2	1226.2		0	0	0	0	0	0	0	0	0	0	0	0		0	0	0	0	0	0		0	0	0	0	0	0		0	0	0	0	0	0
1698	2017-05-10	1222.7	1222.7	1222.7	1222.7	1222.7	1222.7	1222.7		0	0	0	0	0	0	0	0	0	0	0	0		0	0	0	0	0	0		0	0	0	0	0	0		0	0	0	0	0	0
1699	2017-05-09	1217.3	1217.3	1217.3	1217.3	1217.3	1217.3	1217.3		0	0	0	0	0	0	0	0	0	0	0	0		0	0	0	0	0	0		0	0	0	0	0	0		0	0	0	0	0	0
1700	2017-05-08	1214.3	1214.3	1214.3	1214.3	1214.3	1214.3	1214.3		0	0	0	0	0	0	0	0	0	0	0	0		0	0	0	0	0	0		0	0	0	0	0	0		0	0	0	0	0	0
1701	2017-05-07	1225.3	1225.3	1225.3	1225.3	1225.3	1225.3	1225.3		0	0	0	0	0	0	0	0	0	0	0	0		0	0	0	0	0	0		0	0	0	0	0	0		0	0	0	0	0	0
1702	2017-05-04	1224.8	1224.8	1224.8	1224.8	1224.8	1224.8	1224.8		0	0	0	0	0	0	0	0	0	0	0	0		0	0	0	0	0	0		0	0	0	0	0	0		0	0	0	0	0	0
1703	2017-05-03	1226.5	1226.5	1226.5	1226.5	1226.5	1226.5	1226.5		0	0	0	0	0	0	0	0	0	0	0	0		0	0	0	0	0	0		0	0	0	0	0	0		0	0	0	0	0	0
1704	2017-05-02	1246.4	1246.4	1246.4	1246.4	1246.4	1246.4	1246.4		0	0	0	0	0	0	0	0	0	0	0	0		0	0	0	0	0	0		0	0	0	0	0	0		0	0	0	0	0	0
1705	2017-05-01	1255.1	1255.1	1255.1	1255.1	1255.1	1255.1	1255.1		0	0	0	0	0	0	0	0	0	0	0	0		0	0	0	0	0	0		0	0	0	0	0	0		0	0	0	0	0	0
1706	2017-04-30	1253.3	1253.3	1253.3	1253.3	1253.3	1253.3	1253.3		0	0	0	0	0	0	0	0	0	0	0	0		0	0	0	0	0	0		0	0	0	0	0	0		0	0	0	0	0	0
1707	2017-04-27	1266.1	1266.1	1266.1	1266.1	1266.1	1266.1	1266.1		0	0	0	0	0	0	0	0	0	0	0	0		0	0	0	0	0	0		0	0	0	0	0	0		0	0	0	0	0	0
1708	2017-04-26	1263.7	1263.7	1263.7	1263.7	1263.7	1263.7	1263.7		0	0	0	0	0	0	0	0	0	0	0	0		0	0	0	0	0	0		0	0	0	0	0	0		0	0	0	0	0	0
1709	2017-04-25	1262.1	1109.887	1264.096	1264.6	1264.891	1264.650	1133.439		-152.213	152.213	1.996	1.996	2.5	2.5	2.791	2.791	2.55	2.55	-128.661	128.661		23168.8	3.98402	6.25	7.78968	6.5025	16553.7		0.120603	-0.00158149	-0.00198083	-0.00221139	-0.00202044	0.101942		0.120603	0.00158149	0.00198083	0.00221139	0.00202044	0.101942
1710	2017-04-24	1265.6	1265.6	1265.6	1265.6	1265.6	1265.6	1265.6		0	0	0	0	0	0	0	0	0	0	0	0		0	0	0	0	0	0		0	0	0	0	0	0		0	0	0	0	0	0
1711	2017-04-23	1275.8	1275.8	1275.8	1275.8	1275.8	1275.8	1275.8		0	0	0	0	0	0	0	0	0	0	0	0		0	0	0	0	0	0		0	0	0	0	0	0		0	0	0	0	0	0
1712	2017-04-20	1287.4	1287.4	1287.4	1287.4	1287.4	1287.4	1287.4		0	0	0	0	0	0	0	0	0	0	0	0		0	0	0	0	0	0		0	0	0	0	0	0		0	0	0	0	0	0
1713	2017-04-19	1281.9	1281.9	1281.9	1281.9	1281.9	1281.9	1281.9		0	0	0	0	0	0	0	0	0	0	0	0		0	0	0	0	0	0		0	0	0	0	0	0		0	0	0	0	0	0
1714	2017-04-18	1281.4	1281.4	1281.4	1281.4	1281.4	1281.4	1281.4		0	0	0	0	0	0	0	0	0	0	0	0		0	0	0	0	0	0		0	0	0	0	0	0		0	0	0	0	0	0
1715	2017-04-17	1291.7	1291.7	1291.7	1291.7	1291.7	1291.7	1291.7		0	0	0	0	0	0	0	0	0	0	0	0		0	0	0	0	0	0		0	0	0	0	0	0		0	0	0	0	0	0
1716	2017-04-16	1289.4	1289.4	1289.4	1289.4	1289.4	1289.4	1289.4		0	0	0	0	0	0	0	0	0	0	0	0		0	0	0	0	0	0		0	0	0	0	0	0		0	0	0	0	0	0
1717	2017-04-12	1285.9	1285.9	1285.9	1285.9	1285.9	1285.9	1285.9		0	0	0	0	0	0	0	0	0	0	0	0		0	0	0	0	0	0		0	0	0	0	0	0		0	0	0	0	0	0
1718	2017-04-11	1275.3	1275.3	1275.3	1275.3	1275.3	1275.3	1275.3		0	0	0	0	0	0	0	0	0	0	0	0		0	0	0	0	0	0		0	0	0	0	0	0		0	0	0	0	0	0
1719	2017-04-10	1271.2	1271.2	1271.2	1271.2	1271.2	1271.2	1271.2		0	0	0	0	0	0	0	0	0	0	0	0		0	0	0	0	0	0		0	0	0	0	0	0		0	0	0	0	0	0
1720	2017-04-09	1251.1	1251.1	1251.1	1251.1	1251.1	1251.1	1251.1		0	0	0	0	0	0	0	0	0	0	0	0		0	0	0	0	0	0		0	0	0	0	0	0		0	0	0	0	0	0
1721	2017-04-06	1254.3	1109.887	1258.481	1251.367	1252.970	1247.680	1132.768		-144.413	144.413	4.181	4.181	-2.933	2.933	-1.33	1.33	-6.62	6.62	-121.532	121.532		20855.1	17.4808	8.60249	1.7689	43.8244	14770		0.115134	-0.00333333	0.00233836	0.00106035	0.00527784	0.0968923		0.115134	0.00333333	0.00233836	0.00106035	0.00527784	0.0968923
1722	2017-04-05	1250.3	1109.887	1252.348	1253.3	1251.503	1246.540	1132.630		-140.413	140.413	2.048	2.048	3	3	1.203	1.203	-3.76	3.76	-117.67	117.67		19715.8	4.1943	9	1.44721	14.1376	13846.2		0.112303	-0.00163801	-0.00239942	-0.000962169	0.00300728	0.0941134		0.112303	0.00163801	0.00239942	0.000962169	0.00300728	0.0941134
1723	2017-04-04	1245.4	1245.4	1245.4	1245.4	1245.4	1245.4	1245.4		0	0	0	0	0	0	0	0	0	0	0	0		0	0	0	0	0	0		0	0	0	0	0	0		0	0	0	0	0	0
1724	2017-04-03	1255	1255.0	1255.0	1255.0	1255.0	1255.0	1255.0		0	0	0	0	0	0	0	0	0	0	0	0		0	0	0	0	0	0		0	0	0	0	0	0		0	0	0	0	0	0
1725	2017-04-02	1250.8	1250.8	1250.8	1250.8	1250.8	1250.8	1250.8		0	0	0	0	0	0	0	0	0	0	0	0		0	0	0	0	0	0		0	0	0	0	0	0		0	0	0	0	0	0
1726	2017-03-30	1247.3	1247.3	1247.3	1247.3	1247.3	1247.3	1247.3		0	0	0	0	0	0	0	0	0	0	0	0		0	0	0	0	0	0		0	0	0	0	0	0		0	0	0	0	0	0
1727	2017-03-29	1245	1109.887	1246.506	1244.067	1245.907	1250.350	1132.253		-135.113	135.113	1.506	1.506	-0.933	0.933	0.907	0.907	5.35	5.35	-112.747	112.747		18255.5	2.26804	0.870489	0.822649	28.6225	12711.9		0.108524	-0.00120964	0.000749398	-0.000728514	-0.00429719	0.0905598		0.108524	0.00120964	0.000749398	0.000728514	0.00429719	0.0905598
1728	2017-03-28	1253.4	1253.4	1253.4	1253.4	1253.4	1253.4	1253.4		0	0	0	0	0	0	0	0	0	0	0	0		0	0	0	0	0	0		0	0	0	0	0	0		0	0	0	0	0	0
1729	2017-03-27	1255.3	1255.3	1255.3	1255.3	1255.3	1255.3	1255.3		0	0	0	0	0	0	0	0	0	0	0	0		0	0	0	0	0	0		0	0	0	0	0	0		0	0	0	0	0	0
1730	2017-03-26	1255.4	1255.4	1255.4	1255.4	1255.4	1255.4	1255.4		0	0	0	0	0	0	0	0	0	0	0	0		0	0	0	0	0	0		0	0	0	0	0	0		0	0	0	0	0	0
1731	2017-03-23	1248.2	1248.2	1248.2	1248.2	1248.2	1248.2	1248.2		0	0	0	0	0	0	0	0	0	0	0	0		0	0	0	0	0	0		0	0	0	0	0	0		0	0	0	0	0	0
1732	2017-03-22	1246.9	1246.9	1246.9	1246.9	1246.9	1246.9	1246.9		0	0	0	0	0	0	0	0	0	0	0	0		0	0	0	0	0	0		0	0	0	0	0	0		0	0	0	0	0	0
1733	2017-03-21	1249.3	1249.3	1249.3	1249.3	1249.3	1249.3	1249.3		0	0	0	0	0	0	0	0	0	0	0	0		0	0	0	0	0	0		0	0	0	0	0	0		0	0	0	0	0	0
1734	2017-03-20	1246.1	1246.1	1246.1	1246.1	1246.1	1246.1	1246.1		0	0	0	0	0	0	0	0	0	0	0	0		0	0	0	0	0	0		0	0	0	0	0	0		0	0	0	0	0	0
1735	2017-03-19	1233.6	1233.6	1233.6	1233.6	1233.6	1233.6	1233.6		0	0	0	0	0	0	0	0	0	0	0	0		0	0	0	0	0	0		0	0	0	0	0	0		0	0	0	0	0	0
1736	2017-03-16	1229.8	1229.8	1229.8	1229.8	1229.8	1229.8	1229.8		0	0	0	0	0	0	0	0	0	0	0	0		0	0	0	0	0	0		0	0	0	0	0	0		0	0	0	0	0	0
1737	2017-03-15	1226.5	1226.5	1226.5	1226.5	1226.5	1226.5	1226.5		0	0	0	0	0	0	0	0	0	0	0	0		0	0	0	0	0	0		0	0	0	0	0	0		0	0	0	0	0	0
1738	2017-03-14	1200.1	1200.1	1200.1	1200.1	1200.1	1200.1	1200.1		0	0	0	0	0	0	0	0	0	0	0	0		0	0	0	0	0	0		0	0	0	0	0	0		0	0	0	0	0	0
1739	2017-03-13	1201.9	1201.9	1201.9	1201.9	1201.9	1201.9	1201.9		0	0	0	0	0	0	0	0	0	0	0	0		0	0	0	0	0	0		0	0	0	0	0	0		0	0	0	0	0	0
1740	2017-03-12	1202.4	1202.4	1202.4	1202.4	1202.4	1202.4	1202.4		0	0	0	0	0	0	0	0	0	0	0	0		0	0	0	0	0	0		0	0	0	0	0	0		0	0	0	0	0	0
1741	2017-03-10	1200.7	1200.7	1200.7	1200.7	1200.7	1200.7	1200.7		0	0	0	0	0	0	0	0	0	0	0	0		0	0	0	0	0	0		0	0	0	0	0	0		0	0	0	0	0	0
1742	2017-03-09	1202.4	1202.4	1202.4	1202.4	1202.4	1202.4	1202.4		0	0	0	0	0	0	0	0	0	0	0	0		0	0	0	0	0	0		0	0	0	0	0	0		0	0	0	0	0	0
1743	2017-03-08	1208.5	1208.5	1208.5	1208.5	1208.5	1208.5	1208.5		0	0	0	0	0	0	0	0	0	0	0	0		0	0	0	0	0	0		0	0	0	0	0	0		0	0	0	0	0	0
1744	2017-03-07	1215.1	1215.1	1215.1	1215.1	1215.1	1215.1	1215.1		0	0	0	0	0	0	0	0	0	0	0	0		0	0	0	0	0	0		0	0	0	0	0	0		0	0	0	0	0	0
1745	2017-03-06	1224.5	1224.5	1224.5	1224.5	1224.5	1224.5	1224.5		0	0	0	0	0	0	0	0	0	0	0	0		0	0	0	0	0	0		0	0	0	0	0	0		0	0	0	0	0	0
1746	2017-03-03	1225.5	1225.5	1225.5	1225.5	1225.5	1225.5	1225.5		0	0	0	0	0	0	0	0	0	0	0	0		0	0	0	0	0	0		0	0	0	0	0	0		0	0	0	0	0	0
1747	2017-03-02	1231.9	1231.9	1231.9	1231.9	1231.9	1231.9	1231.9		0	0	0	0	0	0	0	0	0	0	0	0		0	0	0	0	0	0		0	0	0	0	0	0		0	0	0	0	0	0
1748	2017-03-01	1248.9	1248.9	1248.9	1248.9	1248.9	1248.9	1248.9		0	0	0	0	0	0	0	0	0	0	0	0		0	0	0	0	0	0		0	0	0	0	0	0		0	0	0	0	0	0
1749	2017-02-28	1252.6	1252.6	1252.6	1252.6	1252.6	1252.6	1252.6		0	0	0	0	0	0	0	0	0	0	0	0		0	0	0	0	0	0		0	0	0	0	0	0		0	0	0	0	0	0
1750	2017-02-27	1257.4	1257.4	1257.4	1257.4	1257.4	1257.4	1257.4		0	0	0	0	0	0	0	0	0	0	0	0		0	0	0	0	0	0		0	0	0	0	0	0		0	0	0	0	0	0
1751	2017-02-24	1256.9	1256.9	1256.9	1256.9	1256.9	1256.9	1256.9		0	0	0	0	0	0	0	0	0	0	0	0		0	0	0	0	0	0		0	0	0	0	0	0		0	0	0	0	0	0
1752	2017-02-23	1250.2	1250.2	1250.2	1250.2	1250.2	1250.2	1250.2		0	0	0	0	0	0	0	0	0	0	0	0		0	0	0	0	0	0		0	0	0	0	0	0		0	0	0	0	0	0
1753	2017-02-22	1232	1232.0	1232.0	1232.0	1232.0	1232.0	1232.0		0	0	0	0	0	0	0	0	0	0	0	0		0	0	0	0	0	0		0	0	0	0	0	0		0	0	0	0	0	0
1754	2017-02-21	1237.5	1237.5	1237.5	1237.5	1237.5	1237.5	1237.5		0	0	0	0	0	0	0	0	0	0	0	0		0	0	0	0	0	0		0	0	0	0	0	0		0	0	0	0	0	0
1755	2017-02-17	1237.6	1237.6	1237.6	1237.6	1237.6	1237.6	1237.6		0	0	0	0	0	0	0	0	0	0	0	0		0	0	0	0	0	0		0	0	0	0	0	0		0	0	0	0	0	0
1756	2017-02-16	1240	1240.0	1240.0	1240.0	1240.0	1240.0	1240.0		0	0	0	0	0	0	0	0	0	0	0	0		0	0	0	0	0	0		0	0	0	0	0	0		0	0	0	0	0	0
1757	2017-02-15	1231.7	1231.7	1231.7	1231.7	1231.7	1231.7	1231.7		0	0	0	0	0	0	0	0	0	0	0	0		0	0	0	0	0	0		0	0	0	0	0	0		0	0	0	0	0	0
1758	2017-02-14	1223.9	1223.9	1223.9	1223.9	1223.9	1223.9	1223.9		0	0	0	0	0	0	0	0	0	0	0	0		0	0	0	0	0	0		0	0	0	0	0	0		0	0	0	0	0	0
1759	2017-02-13	1224.4	1224.4	1224.4	1224.4	1224.4	1224.4	1224.4		0	0	0	0	0	0	0	0	0	0	0	0		0	0	0	0	0	0		0	0	0	0	0	0		0	0	0	0	0	0
1760	2017-02-10	1234.4	1234.4	1234.4	1234.4	1234.4	1234.4	1234.4		0	0	0	0	0	0	0	0	0	0	0	0		0	0	0	0	0	0		0	0	0	0	0	0		0	0	0	0	0	0
1761	2017-02-09	1235.1	1109.887	1236.519	1232.767	1234.812	1236.0	1131.302		-125.213	125.213	1.419	1.419	-2.333	2.333	-0.288	0.288	0.9	0.9	-103.798	103.798		15678.3	2.01356	5.44289	0.082944	0.81	10774		0.101379	-0.00114889	0.00188892	0.000233179	-0.000728686	0.0840402		0.101379	0.00114889	0.00188892	0.000233179	0.000728686	0.0840402
1762	2017-02-08	1237.6	1237.6	1237.6	1237.6	1237.6	1237.6	1237.6		0	0	0	0	0	0	0	0	0	0	0	0		0	0	0	0	0	0		0	0	0	0	0	0		0	0	0	0	0	0
1763	2017-02-07	1234.2	1109.887	1235.347	1232.433	1232.974	1233.8	1131.034		-124.313	124.313	1.147	1.147	-1.767	1.767	-1.226	1.226	-0.4	0.4	-103.166	103.166		15453.7	1.31561	3.12229	1.50308	0.16	10643.2		0.100724	-0.000929347	0.0014317	0.000993356	0.000324097	0.0835894		0.100724	0.000929347	0.0014317	0.000993356	0.000324097	0.0835894
1764	2017-02-06	1230	1230.0	1230.0	1230.0	1230.0	1230.0	1230.0		0	0	0	0	0	0	0	0	0	0	0	0		0	0	0	0	0	0		0	0	0	0	0	0		0	0	0	0	0	0
1765	2017-02-03	1218.5	1218.5	1218.5	1218.5	1218.5	1218.5	1218.5		0	0	0	0	0	0	0	0	0	0	0	0		0	0	0	0	0	0		0	0	0	0	0	0		0	0	0	0	0	0
1766	2017-02-02	1216.7	1216.7	1216.7	1216.7	1216.7	1216.7	1216.7		0	0	0	0	0	0	0	0	0	0	0	0		0	0	0	0	0	0		0	0	0	0	0	0		0	0	0	0	0	0
1767	2017-02-01	1205.6	1205.6	1205.6	1205.6	1205.6	1205.6	1205.6		0	0	0	0	0	0	0	0	0	0	0	0		0	0	0	0	0	0		0	0	0	0	0	0		0	0	0	0	0	0
1768	2017-01-31	1208.6	1208.6	1208.6	1208.6	1208.6	1208.6	1208.6		0	0	0	0	0	0	0	0	0	0	0	0		0	0	0	0	0	0		0	0	0	0	0	0		0	0	0	0	0	0
1769	2017-01-30	1193.2	1193.2	1193.2	1193.2	1193.2	1193.2	1193.2		0	0	0	0	0	0	0	0	0	0	0	0		0	0	0	0	0	0		0	0	0	0	0	0		0	0	0	0	0	0
1770	2017-01-27	1188.1	1188.1	1188.1	1188.1	1188.1	1188.1	1188.1		0	0	0	0	0	0	0	0	0	0	0	0		0	0	0	0	0	0		0	0	0	0	0	0		0	0	0	0	0	0
1771	2017-01-26	1189.5	1189.5	1189.5	1189.5	1189.5	1189.5	1189.5		0	0	0	0	0	0	0	0	0	0	0	0		0	0	0	0	0	0		0	0	0	0	0	0		0	0	0	0	0	0
1772	2017-01-25	1197.3	1197.3	1197.3	1197.3	1197.3	1197.3	1197.3		0	0	0	0	0	0	0	0	0	0	0	0		0	0	0	0	0	0		0	0	0	0	0	0		0	0	0	0	0	0
1773	2017-01-24	1210.3	1210.3	1210.3	1210.3	1210.3	1210.3	1210.3		0	0	0	0	0	0	0	0	0	0	0	0		0	0	0	0	0	0		0	0	0	0	0	0		0	0	0	0	0	0
1774	2017-01-23	1215	1215.0	1215.0	1215.0	1215.0	1215.0	1215.0		0	0	0	0	0	0	0	0	0	0	0	0		0	0	0	0	0	0		0	0	0	0	0	0		0	0	0	0	0	0
1775	2017-01-20	1204.3	1204.3	1204.3	1204.3	1204.3	1204.3	1204.3		0	0	0	0	0	0	0	0	0	0	0	0		0	0	0	0	0	0		0	0	0	0	0	0		0	0	0	0	0	0
1776	2017-01-19	1200.9	1200.9	1200.9	1200.9	1200.9	1200.9	1200.9		0	0	0	0	0	0	0	0	0	0	0	0		0	0	0	0	0	0		0	0	0	0	0	0		0	0	0	0	0	0
1777	2017-01-18	1211.3	1211.3	1211.3	1211.3	1211.3	1211.3	1211.3		0	0	0	0	0	0	0	0	0	0	0	0		0	0	0	0	0	0		0	0	0	0	0	0		0	0	0	0	0	0
1778	2017-01-17	1212	1212.0	1212.0	1212.0	1212.0	1212.0	1212.0		0	0	0	0	0	0	0	0	0	0	0	0		0	0	0	0	0	0		0	0	0	0	0	0		0	0	0	0	0	0
1779	2017-01-13	1195.3	1195.3	1195.3	1195.3	1195.3	1195.3	1195.3		0	0	0	0	0	0	0	0	0	0	0	0		0	0	0	0	0	0		0	0	0	0	0	0		0	0	0	0	0	0
1780	2017-01-12	1198.9	1198.9	1198.9	1198.9	1198.9	1198.9	1198.9		0	0	0	0	0	0	0	0	0	0	0	0		0	0	0	0	0	0		0	0	0	0	0	0		0	0	0	0	0	0
1781	2017-01-11	1195.6	1195.6	1195.6	1195.6	1195.6	1195.6	1195.6		0	0	0	0	0	0	0	0	0	0	0	0		0	0	0	0	0	0		0	0	0	0	0	0		0	0	0	0	0	0
1782	2017-01-10	1184.2	1184.2	1184.2	1184.2	1184.2	1184.2	1184.2		0	0	0	0	0	0	0	0	0	0	0	0		0	0	0	0	0	0		0	0	0	0	0	0		0	0	0	0	0	0
1783	2017-01-09	1183.5	1183.5	1183.5	1183.5	1183.5	1183.5	1183.5		0	0	0	0	0	0	0	0	0	0	0	0		0	0	0	0	0	0		0	0	0	0	0	0		0	0	0	0	0	0
1784	2017-01-06	1171.9	1171.9	1171.9	1171.9	1171.9	1171.9	1171.9		0	0	0	0	0	0	0	0	0	0	0	0		0	0	0	0	0	0		0	0	0	0	0	0		0	0	0	0	0	0
1785	2017-01-05	1179.7	1179.7	1179.7	1179.7	1179.7	1179.7	1179.7		0	0	0	0	0	0	0	0	0	0	0	0		0	0	0	0	0	0		0	0	0	0	0	0		0	0	0	0	0	0
1786	2017-01-04	1163.8	1163.8	1163.8	1163.8	1163.8	1163.8	1163.8		0	0	0	0	0	0	0	0	0	0	0	0		0	0	0	0	0	0		0	0	0	0	0	0		0	0	0	0	0	0
1787	2017-01-03	1160.4	1109.887	1152.082	1154.2	1150.874	1161.040	1125.426		-50.513	50.513	-8.318	8.318	-6.2	6.2	-9.526	9.526	0.64	0.64	-34.974	34.974		2551.56	69.1891	38.44	90.7447	0.4096	1223.18		0.0435307	0.00716822	0.00534299	0.00820924	-0.000551534	0.0301396		0.0435307	0.00716822	0.00534299	0.00820924	0.000551534	0.0301396
1788	2016-12-30	1150	1150.0	1150.0	1150.0	1150.0	1150.0	1150.0		0	0	0	0	0	0	0	0	0	0	0	0		0	0	0	0	0	0		0	0	0	0	0	0		0	0	0	0	0	0
1789	2016-12-29	1156.4	1156.4	1156.4	1156.4	1156.4	1156.4	1156.4		0	0	0	0	0	0	0	0	0	0	0	0		0	0	0	0	0	0		0	0	0	0	0	0		0	0	0	0	0	0
1790	2016-12-28	1139.4	1139.4	1139.4	1139.4	1139.4	1139.4	1139.4		0	0	0	0	0	0	0	0	0	0	0	0		0	0	0	0	0	0		0	0	0	0	0	0		0	0	0	0	0	0
1791	2016-12-27	1137.3	1137.3	1137.3	1137.3	1137.3	1137.3	1137.3		0	0	0	0	0	0	0	0	0	0	0	0		0	0	0	0	0	0		0	0	0	0	0	0		0	0	0	0	0	0
1792	2016-12-23	1131.9	1131.9	1131.9	1131.9	1131.9	1131.9	1131.9		0	0	0	0	0	0	0	0	0	0	0	0		0	0	0	0	0	0		0	0	0	0	0	0		0	0	0	0	0	0
1793	2016-12-22	1128.8	1128.8	1128.8	1128.8	1128.8	1128.8	1128.8		0	0	0	0	0	0	0	0	0	0	0	0		0	0	0	0	0	0		0	0	0	0	0	0		0	0	0	0	0	0
1794	2016-12-21	1131.1	1131.1	1131.1	1131.1	1131.1	1131.1	1131.1		0	0	0	0	0	0	0	0	0	0	0	0		0	0	0	0	0	0		0	0	0	0	0	0		0	0	0	0	0	0
1795	2016-12-20	1131.5	1131.5	1131.5	1131.5	1131.5	1131.5	1131.5		0	0	0	0	0	0	0	0	0	0	0	0		0	0	0	0	0	0		0	0	0	0	0	0		0	0	0	0	0	0
1796	2016-12-19	1140.5	1140.5	1140.5	1140.5	1140.5	1140.5	1140.5		0	0	0	0	0	0	0	0	0	0	0	0		0	0	0	0	0	0		0	0	0	0	0	0		0	0	0	0	0	0
1797	2016-12-16	1135.3	1135.3	1135.3	1135.3	1135.3	1135.3	1135.3		0	0	0	0	0	0	0	0	0	0	0	0		0	0	0	0	0	0		0	0	0	0	0	0		0	0	0	0	0	0
1798	2016-12-15	1127.8	1127.8	1127.8	1127.8	1127.8	1127.8	1127.8		0	0	0	0	0	0	0	0	0	0	0	0		0	0	0	0	0	0		0	0	0	0	0	0		0	0	0	0	0	0
1799	2016-12-14	1161.3	1161.3	1161.3	1161.3	1161.3	1161.3	1161.3		0	0	0	0	0	0	0	0	0	0	0	0		0	0	0	0	0	0		0	0	0	0	0	0		0	0	0	0	0	0
1800	2016-12-13	1156.7	1156.7	1156.7	1156.7	1156.7	1156.7	1156.7		0	0	0	0	0	0	0	0	0	0	0	0		0	0	0	0	0	0		0	0	0	0	0	0		0	0	0	0	0	0
1801	2016-12-12	1163.5	1163.5	1163.5	1163.5	1163.5	1163.5	1163.5		0	0	0	0	0	0	0	0	0	0	0	0		0	0	0	0	0	0		0	0	0	0	0	0		0	0	0	0	0	0
1802	2016-12-09	1159.4	1159.4	1159.4	1159.4	1159.4	1159.4	1159.4		0	0	0	0	0	0	0	0	0	0	0	0		0	0	0	0	0	0		0	0	0	0	0	0		0	0	0	0	0	0
1803	2016-12-08	1169.8	1169.8	1169.8	1169.8	1169.8	1169.8	1169.8		0	0	0	0	0	0	0	0	0	0	0	0		0	0	0	0	0	0		0	0	0	0	0	0		0	0	0	0	0	0
1804	2016-12-07	1175	1175.0	1175.0	1175.0	1175.0	1175.0	1175.0		0	0	0	0	0	0	0	0	0	0	0	0		0	0	0	0	0	0		0	0	0	0	0	0		0	0	0	0	0	0
1805	2016-12-06	1167.6	1167.6	1167.6	1167.6	1167.6	1167.6	1167.6		0	0	0	0	0	0	0	0	0	0	0	0		0	0	0	0	0	0		0	0	0	0	0	0		0	0	0	0	0	0
1806	2016-12-05	1174	1174.0	1174.0	1174.0	1174.0	1174.0	1174.0		0	0	0	0	0	0	0	0	0	0	0	0		0	0	0	0	0	0		0	0	0	0	0	0		0	0	0	0	0	0
1807	2016-12-02	1175.1	1175.1	1175.1	1175.1	1175.1	1175.1	1175.1		0	0	0	0	0	0	0	0	0	0	0	0		0	0	0	0	0	0		0	0	0	0	0	0		0	0	0	0	0	0
1808	2016-12-01	1166.9	1166.9	1166.9	1166.9	1166.9	1166.9	1166.9		0	0	0	0	0	0	0	0	0	0	0	0		0	0	0	0	0	0		0	0	0	0	0	0		0	0	0	0	0	0
1809	2016-11-30	1170.8	1170.8	1170.8	1170.8	1170.8	1170.8	1170.8		0	0	0	0	0	0	0	0	0	0	0	0		0	0	0	0	0	0		0	0	0	0	0	0		0	0	0	0	0	0
1810	2016-11-29	1187.9	1187.9	1187.9	1187.9	1187.9	1187.9	1187.9		0	0	0	0	0	0	0	0	0	0	0	0		0	0	0	0	0	0		0	0	0	0	0	0		0	0	0	0	0	0
1811	2016-11-28	1190.6	1190.6	1190.6	1190.6	1190.6	1190.6	1190.6		0	0	0	0	0	0	0	0	0	0	0	0		0	0	0	0	0	0		0	0	0	0	0	0		0	0	0	0	0	0
1812	2016-11-25	1178.2	1178.2	1178.2	1178.2	1178.2	1178.2	1178.2		0	0	0	0	0	0	0	0	0	0	0	0		0	0	0	0	0	0		0	0	0	0	0	0		0	0	0	0	0	0
1813	2016-11-23	1189.1	1189.1	1189.1	1189.1	1189.1	1189.1	1189.1		0	0	0	0	0	0	0	0	0	0	0	0		0	0	0	0	0	0		0	0	0	0	0	0		0	0	0	0	0	0
1814	2016-11-22	1211	1211.0	1211.0	1211.0	1211.0	1211.0	1211.0		0	0	0	0	0	0	0	0	0	0	0	0		0	0	0	0	0	0		0	0	0	0	0	0		0	0	0	0	0	0
1815	2016-11-21	1209.6	1209.6	1209.6	1209.6	1209.6	1209.6	1209.6		0	0	0	0	0	0	0	0	0	0	0	0		0	0	0	0	0	0		0	0	0	0	0	0		0	0	0	0	0	0
1816	2016-11-18	1208.5	1109.887	1210.178	1210.533	1208.930	1214.775	1129.383		-98.613	98.613	1.678	1.678	2.033	2.033	0.43	0.43	6.275	6.275	-79.117	79.117		9724.52	2.81568	4.13309	0.1849	39.3756	6259.5		0.0815995	-0.0013885	-0.00168225	-0.000355813	-0.00519239	0.0654671		0.0815995	0.0013885	0.00168225	0.000355813	0.00519239	0.0654671
1817	2016-11-17	1216.5	1216.5	1216.5	1216.5	1216.5	1216.5	1216.5		0	0	0	0	0	0	0	0	0	0	0	0		0	0	0	0	0	0		0	0	0	0	0	0		0	0	0	0	0	0
1818	2016-11-16	1223.4	1223.4	1223.4	1223.4	1223.4	1223.4	1223.4		0	0	0	0	0	0	0	0	0	0	0	0		0	0	0	0	0	0		0	0	0	0	0	0		0	0	0	0	0	0
1819	2016-11-15	1224	1224.0	1224.0	1224.0	1224.0	1224.0	1224.0		0	0	0	0	0	0	0	0	0	0	0	0		0	0	0	0	0	0		0	0	0	0	0	0		0	0	0	0	0	0
1820	2016-11-14	1221.2	1221.2	1221.2	1221.2	1221.2	1221.2	1221.2		0	0	0	0	0	0	0	0	0	0	0	0		0	0	0	0	0	0		0	0	0	0	0	0		0	0	0	0	0	0
1821	2016-11-10	1265.5	1265.5	1265.5	1265.5	1265.5	1265.5	1265.5		0	0	0	0	0	0	0	0	0	0	0	0		0	0	0	0	0	0		0	0	0	0	0	0		0	0	0	0	0	0
1822	2016-11-09	1272.6	1109.887	1305.460	1309.0	1310.167	1269.450	1135.182		-162.713	162.713	32.86	32.86	36.4	36.4	37.567	37.567	-3.15	3.15	-137.418	137.418		26475.5	1079.78	1324.96	1411.28	9.9225	18883.7		0.127859	-0.0258212	-0.0286029	-0.0295199	0.00247525	0.107982		0.127859	0.0258212	0.0286029	0.0295199	0.00247525	0.107982
1823	2016-11-08	1273.4	1273.4	1273.4	1273.4	1273.4	1273.4	1273.4		0	0	0	0	0	0	0	0	0	0	0	0		0	0	0	0	0	0		0	0	0	0	0	0		0	0	0	0	0	0
1824	2016-11-07	1278.3	1109.887	1288.696	1284.6	1285.471	1279.380	1135.306		-168.413	168.413	10.396	10.396	6.3	6.3	7.171	7.171	1.08	1.08	-142.994	142.994		28362.9	108.077	39.69	51.4232	1.1664	20447.3		0.131748	-0.00813268	-0.00492842	-0.00560979	-0.000844872	0.111863		0.131748	0.00813268	0.00492842	0.00560979	0.000844872	0.111863
1825	2016-11-03	1303.3	1303.3	1303.3	1303.3	1303.3	1303.3	1303.3		0	0	0	0	0	0	0	0	0	0	0	0		0	0	0	0	0	0		0	0	0	0	0	0		0	0	0	0	0	0
1826	2016-11-02	1302.1	1302.1	1302.1	1302.1	1302.1	1302.1	1302.1		0	0	0	0	0	0	0	0	0	0	0	0		0	0	0	0	0	0		0	0	0	0	0	0		0	0	0	0	0	0
1827	2016-11-01	1306.8	1306.8	1306.8	1306.8	1306.8	1306.8	1306.8		0	0	0	0	0	0	0	0	0	0	0	0		0	0	0	0	0	0		0	0	0	0	0	0		0	0	0	0	0	0
1828	2016-10-31	1286.4	1109.887	1288.696	1288.767	1285.332	1289.150	1134.883		-176.513	176.513	2.296	2.296	2.367	2.367	-1.068	1.068	2.75	2.75	-151.517	151.517		31156.8	5.27162	5.60269	1.14062	7.5625	22957.4		0.137215	-0.00178483	-0.00184002	0.000830224	-0.00213775	0.117784		0.137215	0.00178483	0.00184002	0.000830224	0.00213775	0.117784
1829	2016-10-30	1271.5	1271.5	1271.5	1271.5	1271.5	1271.5	1271.5		0	0	0	0	0	0	0	0	0	0	0	0		0	0	0	0	0	0		0	0	0	0	0	0		0	0	0	0	0	0
1830	2016-10-28	1275.5	1275.5	1275.5	1275.5	1275.5	1275.5	1275.5		0	0	0	0	0	0	0	0	0	0	0	0		0	0	0	0	0	0		0	0	0	0	0	0		0	0	0	0	0	0
1831	2016-10-26	1267.9	1267.9	1267.9	1267.9	1267.9	1267.9	1267.9		0	0	0	0	0	0	0	0	0	0	0	0		0	0	0	0	0	0		0	0	0	0	0	0		0	0	0	0	0	0
1832	2016-10-25	1264.8	1264.8	1264.8	1264.8	1264.8	1264.8	1264.8		0	0	0	0	0	0	0	0	0	0	0	0		0	0	0	0	0	0		0	0	0	0	0	0		0	0	0	0	0	0
1833	2016-10-24	1271.9	1271.9	1271.9	1271.9	1271.9	1271.9	1271.9		0	0	0	0	0	0	0	0	0	0	0	0		0	0	0	0	0	0		0	0	0	0	0	0		0	0	0	0	0	0
1834	2016-10-23	1262	1262.0	1262.0	1262.0	1262.0	1262.0	1262.0		0	0	0	0	0	0	0	0	0	0	0	0		0	0	0	0	0	0		0	0	0	0	0	0		0	0	0	0	0	0
1835	2016-10-20	1265.9	1265.9	1265.9	1265.9	1265.9	1265.9	1265.9		0	0	0	0	0	0	0	0	0	0	0	0		0	0	0	0	0	0		0	0	0	0	0	0		0	0	0	0	0	0
1836	2016-10-19	1265.6	1265.6	1265.6	1265.6	1265.6	1265.6	1265.6		0	0	0	0	0	0	0	0	0	0	0	0		0	0	0	0	0	0		0	0	0	0	0	0		0	0	0	0	0	0
1837	2016-10-18	1267.9	1267.9	1267.9	1267.9	1267.9	1267.9	1267.9		0	0	0	0	0	0	0	0	0	0	0	0		0	0	0	0	0	0		0	0	0	0	0	0		0	0	0	0	0	0
1838	2016-10-17	1260.8	1260.8	1260.8	1260.8	1260.8	1260.8	1260.8		0	0	0	0	0	0	0	0	0	0	0	0		0	0	0	0	0	0		0	0	0	0	0	0		0	0	0	0	0	0
1839	2016-10-16	1254.4	1254.4	1254.4	1254.4	1254.4	1254.4	1254.4		0	0	0	0	0	0	0	0	0	0	0	0		0	0	0	0	0	0		0	0	0	0	0	0		0	0	0	0	0	0
1840	2016-10-13	1253.1	1253.1	1253.1	1253.1	1253.1	1253.1	1253.1		0	0	0	0	0	0	0	0	0	0	0	0		0	0	0	0	0	0		0	0	0	0	0	0		0	0	0	0	0	0
1841	2016-10-12	1255	1255.0	1255.0	1255.0	1255.0	1255.0	1255.0		0	0	0	0	0	0	0	0	0	0	0	0		0	0	0	0	0	0		0	0	0	0	0	0		0	0	0	0	0	0
1842	2016-10-11	1251.1	1251.1	1251.1	1251.1	1251.1	1251.1	1251.1		0	0	0	0	0	0	0	0	0	0	0	0		0	0	0	0	0	0		0	0	0	0	0	0		0	0	0	0	0	0
1843	2016-10-10	1253	1253.0	1253.0	1253.0	1253.0	1253.0	1253.0		0	0	0	0	0	0	0	0	0	0	0	0		0	0	0	0	0	0		0	0	0	0	0	0		0	0	0	0	0	0
1844	2016-10-06	1248.9	1248.9	1248.9	1248.9	1248.9	1248.9	1248.9		0	0	0	0	0	0	0	0	0	0	0	0		0	0	0	0	0	0		0	0	0	0	0	0		0	0	0	0	0	0
1845	2016-10-05	1249.8	1249.8	1249.8	1249.8	1249.8	1249.8	1249.8		0	0	0	0	0	0	0	0	0	0	0	0		0	0	0	0	0	0		0	0	0	0	0	0		0	0	0	0	0	0
1846	2016-10-04	1265.2	1265.2	1265.2	1265.2	1265.2	1265.2	1265.2		0	0	0	0	0	0	0	0	0	0	0	0		0	0	0	0	0	0		0	0	0	0	0	0		0	0	0	0	0	0
1847	2016-10-03	1266.3	1266.3	1266.3	1266.3	1266.3	1266.3	1266.3		0	0	0	0	0	0	0	0	0	0	0	0		0	0	0	0	0	0		0	0	0	0	0	0		0	0	0	0	0	0
1848	2016-10-02	1309	1309.0	1309.0	1309.0	1309.0	1309.0	1309.0		0	0	0	0	0	0	0	0	0	0	0	0		0	0	0	0	0	0		0	0	0	0	0	0		0	0	0	0	0	0
1849	2016-09-29	1313.3	1313.3	1313.3	1313.3	1313.3	1313.3	1313.3		0	0	0	0	0	0	0	0	0	0	0	0		0	0	0	0	0	0		0	0	0	0	0	0		0	0	0	0	0	0
1850	2016-09-28	1321.7	1321.7	1321.7	1321.7	1321.7	1321.7	1321.7		0	0	0	0	0	0	0	0	0	0	0	0		0	0	0	0	0	0		0	0	0	0	0	0		0	0	0	0	0	0
1851	2016-09-27	1319.4	1319.4	1319.4	1319.4	1319.4	1319.4	1319.4		0	0	0	0	0	0	0	0	0	0	0	0		0	0	0	0	0	0		0	0	0	0	0	0		0	0	0	0	0	0
1852	2016-09-26	1325.9	1109.887	1329.253	1328.233	1326.897	1329.550	1138.616		-216.013	216.013	3.353	3.353	2.333	2.333	0.997	0.997	3.65	3.65	-187.284	187.284		46661.6	11.2426	5.44289	0.994009	13.3225	35075.3		0.162918	-0.00252885	-0.00175956	-0.000751942	-0.00275285	0.14125		0.162918	0.00252885	0.00175956	0.000751942	0.00275285	0.14125
1853	2016-09-25	1339.7	1339.7	1339.7	1339.7	1339.7	1339.7	1339.7		0	0	0	0	0	0	0	0	0	0	0	0		0	0	0	0	0	0		0	0	0	0	0	0		0	0	0	0	0	0
1854	2016-09-22	1337.2	1337.2	1337.2	1337.2	1337.2	1337.2	1337.2		0	0	0	0	0	0	0	0	0	0	0	0		0	0	0	0	0	0		0	0	0	0	0	0		0	0	0	0	0	0
1855	2016-09-21	1340.4	1340.4	1340.4	1340.4	1340.4	1340.4	1340.4		0	0	0	0	0	0	0	0	0	0	0	0		0	0	0	0	0	0		0	0	0	0	0	0		0	0	0	0	0	0
1856	2016-09-20	1326.9	1326.9	1326.9	1326.9	1326.9	1326.9	1326.9		0	0	0	0	0	0	0	0	0	0	0	0		0	0	0	0	0	0		0	0	0	0	0	0		0	0	0	0	0	0
1857	2016-09-19	1313.7	1109.887	1314.264	1314.367	1313.704	1320.2	1137.421		-203.813	203.813	0.564	0.564	0.667	0.667	0.004	0.004	6.5	6.5	-176.279	176.279		41539.7	0.318096	0.444889	1.6e-05	42.25	31074.3		0.155144	-0.000429322	-0.000507726	-3.04484e-06	-0.00494786	0.134185		0.155144	0.000429322	0.000507726	3.04484e-06	0.00494786	0.134185
1858	2016-09-18	1313.5	1313.5	1313.5	1313.5	1313.5	1313.5	1313.5		0	0	0	0	0	0	0	0	0	0	0	0		0	0	0	0	0	0		0	0	0	0	0	0		0	0	0	0	0	0
1859	2016-09-15	1305.8	1109.887	1307.289	1306.767	1309.120	1313.5	1137.124		-195.913	195.913	1.489	1.489	0.967	0.967	3.32	3.32	7.7	7.7	-168.676	168.676		38381.9	2.21712	0.935089	11.0224	59.29	28451.6		0.150033	-0.0011403	-0.000740542	-0.0025425	-0.00589677	0.129174		0.150033	0.0011403	0.000740542	0.0025425	0.00589677	0.129174
1860	2016-09-14	1313.5	1313.5	1313.5	1313.5	1313.5	1313.5	1313.5		0	0	0	0	0	0	0	0	0	0	0	0		0	0	0	0	0	0		0	0	0	0	0	0		0	0	0	0	0	0
1861	2016-09-13	1321.5	1321.5	1321.5	1321.5	1321.5	1321.5	1321.5		0	0	0	0	0	0	0	0	0	0	0	0		0	0	0	0	0	0		0	0	0	0	0	0		0	0	0	0	0	0
1862	2016-09-12	1319	1319.0	1319.0	1319.0	1319.0	1319.0	1319.0		0	0	0	0	0	0	0	0	0	0	0	0		0	0	0	0	0	0		0	0	0	0	0	0		0	0	0	0	0	0
1863	2016-09-11	1321	1321.0	1321.0	1321.0	1321.0	1321.0	1321.0		0	0	0	0	0	0	0	0	0	0	0	0		0	0	0	0	0	0		0	0	0	0	0	0		0	0	0	0	0	0
1864	2016-09-08	1330.1	1330.1	1330.1	1330.1	1330.1	1330.1	1330.1		0	0	0	0	0	0	0	0	0	0	0	0		0	0	0	0	0	0		0	0	0	0	0	0		0	0	0	0	0	0
1865	2016-09-07	1336.8	1336.8	1336.8	1336.8	1336.8	1336.8	1336.8		0	0	0	0	0	0	0	0	0	0	0	0		0	0	0	0	0	0		0	0	0	0	0	0		0	0	0	0	0	0
1866	2016-09-06	1344.3	1344.3	1344.3	1344.3	1344.3	1344.3	1344.3		0	0	0	0	0	0	0	0	0	0	0	0		0	0	0	0	0	0		0	0	0	0	0	0		0	0	0	0	0	0
1867	2016-09-05	1349.4	1109.887	1338.056	1339.067	1338.087	1339.860	1138.999		-239.513	239.513	-11.344	11.344	-10.333	10.333	-11.313	11.313	-9.54	9.54	-210.401	210.401		57366.5	128.686	106.771	127.984	91.0116	44268.6		0.177496	0.0084067	0.00765748	0.00838373	0.00706981	0.155922		0.177496	0.0084067	0.00765748	0.00838373	0.00706981	0.155922
1868	2016-09-01	1322.1	1322.1	1322.1	1322.1	1322.1	1322.1	1322.1		0	0	0	0	0	0	0	0	0	0	0	0		0	0	0	0	0	0		0	0	0	0	0	0		0	0	0	0	0	0
1869	2016-08-31	1312.2	1312.2	1312.2	1312.2	1312.2	1312.2	1312.2		0	0	0	0	0	0	0	0	0	0	0	0		0	0	0	0	0	0		0	0	0	0	0	0		0	0	0	0	0	0
1870	2016-08-30	1306.9	1109.887	1307.289	1312.0	1308.188	1311.950	1137.116		-197.013	197.013	0.389	0.389	5.1	5.1	1.288	1.288	5.05	5.05	-169.784	169.784		38814.1	0.151321	26.01	1.65894	25.5025	28826.6		0.150748	-0.000297651	-0.00390236	-0.000985538	-0.00386411	0.129914		0.150748	0.000297651	0.00390236	0.000985538	0.00386411	0.129914
1871	2016-08-29	1311.7	1311.7	1311.7	1311.7	1311.7	1311.7	1311.7		0	0	0	0	0	0	0	0	0	0	0	0		0	0	0	0	0	0		0	0	0	0	0	0		0	0	0	0	0	0
1872	2016-08-28	1322.9	1322.9	1322.9	1322.9	1322.9	1322.9	1322.9		0	0	0	0	0	0	0	0	0	0	0	0		0	0	0	0	0	0		0	0	0	0	0	0		0	0	0	0	0	0
1873	2016-08-25	1321.5	1109.887	1338.056	1338.933	1338.161	1320.8	1138.665		-211.613	211.613	16.556	16.556	17.433	17.433	16.661	16.661	-0.7	0.7	-182.835	182.835		44780.1	274.101	303.909	277.589	0.49	33428.6		0.160131	-0.0125282	-0.0131918	-0.0126076	0.000529701	0.138354		0.160131	0.0125282	0.0131918	0.0126076	0.000529701	0.138354
1874	2016-08-24	1320.1	1320.1	1320.1	1320.1	1320.1	1320.1	1320.1		0	0	0	0	0	0	0	0	0	0	0	0		0	0	0	0	0	0		0	0	0	0	0	0		0	0	0	0	0	0
1875	2016-08-23	1324.4	1324.4	1324.4	1324.4	1324.4	1324.4	1324.4		0	0	0	0	0	0	0	0	0	0	0	0		0	0	0	0	0	0		0	0	0	0	0	0		0	0	0	0	0	0
1876	2016-08-22	1340.6	1340.6	1340.6	1340.6	1340.6	1340.6	1340.6		0	0	0	0	0	0	0	0	0	0	0	0		0	0	0	0	0	0		0	0	0	0	0	0		0	0	0	0	0	0
1877	2016-08-21	1337.7	1337.7	1337.7	1337.7	1337.7	1337.7	1337.7		0	0	0	0	0	0	0	0	0	0	0	0		0	0	0	0	0	0		0	0	0	0	0	0		0	0	0	0	0	0
1878	2016-08-18	1340.4	1340.4	1340.4	1340.4	1340.4	1340.4	1340.4		0	0	0	0	0	0	0	0	0	0	0	0		0	0	0	0	0	0		0	0	0	0	0	0		0	0	0	0	0	0
1879	2016-08-17	1351.2	1351.2	1351.2	1351.2	1351.2	1351.2	1351.2		0	0	0	0	0	0	0	0	0	0	0	0		0	0	0	0	0	0		0	0	0	0	0	0		0	0	0	0	0	0
1880	2016-08-16	1342.7	1109.887	1344.720	1342.767	1343.105	1350.850	1140.064		-232.813	232.813	2.02	2.02	0.067	0.067	0.405	0.405	8.15	8.15	-202.636	202.636		54201.9	4.0804	0.004489	0.164025	66.4225	41061.3		0.173392	-0.00150443	-4.98995e-05	-0.000301631	-0.00606986	0.150917		0.173392	0.00150443	4.98995e-05	0.000301631	0.00606986	0.150917
1881	2016-08-15	1350.5	1350.5	1350.5	1350.5	1350.5	1350.5	1350.5		0	0	0	0	0	0	0	0	0	0	0	0		0	0	0	0	0	0		0	0	0	0	0	0		0	0	0	0	0	0
1882	2016-08-14	1340.3	1340.3	1340.3	1340.3	1340.3	1340.3	1340.3		0	0	0	0	0	0	0	0	0	0	0	0		0	0	0	0	0	0		0	0	0	0	0	0		0	0	0	0	0	0
1883	2016-08-11	1335.8	1335.8	1335.8	1335.8	1335.8	1335.8	1335.8		0	0	0	0	0	0	0	0	0	0	0	0		0	0	0	0	0	0		0	0	0	0	0	0		0	0	0	0	0	0
1884	2016-08-10	1342.5	1342.5	1342.5	1342.5	1342.5	1342.5	1342.5		0	0	0	0	0	0	0	0	0	0	0	0		0	0	0	0	0	0		0	0	0	0	0	0		0	0	0	0	0	0
1885	2016-08-09	1344.3	1344.3	1344.3	1344.3	1344.3	1344.3	1344.3		0	0	0	0	0	0	0	0	0	0	0	0		0	0	0	0	0	0		0	0	0	0	0	0		0	0	0	0	0	0
1886	2016-08-08	1339	1339.0	1339.0	1339.0	1339.0	1339.0	1339.0		0	0	0	0	0	0	0	0	0	0	0	0		0	0	0	0	0	0		0	0	0	0	0	0		0	0	0	0	0	0
1887	2016-08-07	1333.4	1333.4	1333.4	1333.4	1333.4	1333.4	1333.4		0	0	0	0	0	0	0	0	0	0	0	0		0	0	0	0	0	0		0	0	0	0	0	0		0	0	0	0	0	0
1888	2016-08-04	1336.4	1336.4	1336.4	1336.4	1336.4	1336.4	1336.4		0	0	0	0	0	0	0	0	0	0	0	0		0	0	0	0	0	0		0	0	0	0	0	0		0	0	0	0	0	0
1889	2016-08-03	1358.8	1358.8	1358.8	1358.8	1358.8	1358.8	1358.8		0	0	0	0	0	0	0	0	0	0	0	0		0	0	0	0	0	0		0	0	0	0	0	0		0	0	0	0	0	0
1890	2016-08-02	1356.1	1356.1	1356.1	1356.1	1356.1	1356.1	1356.1		0	0	0	0	0	0	0	0	0	0	0	0		0	0	0	0	0	0		0	0	0	0	0	0		0	0	0	0	0	0
1891	2016-08-01	1364.4	1364.4	1364.4	1364.4	1364.4	1364.4	1364.4		0	0	0	0	0	0	0	0	0	0	0	0		0	0	0	0	0	0		0	0	0	0	0	0		0	0	0	0	0	0
1892	2016-07-31	1351.4	1351.4	1351.4	1351.4	1351.4	1351.4	1351.4		0	0	0	0	0	0	0	0	0	0	0	0		0	0	0	0	0	0		0	0	0	0	0	0		0	0	0	0	0	0
1893	2016-07-28	1349	1349.0	1349.0	1349.0	1349.0	1349.0	1349.0		0	0	0	0	0	0	0	0	0	0	0	0		0	0	0	0	0	0		0	0	0	0	0	0		0	0	0	0	0	0
1894	2016-07-27	1332.3	1332.3	1332.3	1332.3	1332.3	1332.3	1332.3		0	0	0	0	0	0	0	0	0	0	0	0		0	0	0	0	0	0		0	0	0	0	0	0		0	0	0	0	0	0
1895	2016-07-26	1326.6	1326.6	1326.6	1326.6	1326.6	1326.6	1326.6		0	0	0	0	0	0	0	0	0	0	0	0		0	0	0	0	0	0		0	0	0	0	0	0		0	0	0	0	0	0
1896	2016-07-25	1320.7	1320.7	1320.7	1320.7	1320.7	1320.7	1320.7		0	0	0	0	0	0	0	0	0	0	0	0		0	0	0	0	0	0		0	0	0	0	0	0		0	0	0	0	0	0
1897	2016-07-24	1319.3	1109.887	1319.214	1318.4	1316.988	1321.3	1137.640		-209.413	209.413	-0.086	0.086	-0.9	0.9	-2.312	2.312	2	2	-181.66	181.66		43853.8	0.007396	0.81	5.34534	4	33000.4		0.15873	6.51861e-05	0.00068218	0.00175244	-0.00151596	0.137694		0.15873	6.51861e-05	0.00068218	0.00175244	0.00151596	0.137694
1898	2016-07-21	1323.1	1323.1	1323.1	1323.1	1323.1	1323.1	1323.1		0	0	0	0	0	0	0	0	0	0	0	0		0	0	0	0	0	0		0	0	0	0	0	0		0	0	0	0	0	0
1899	2016-07-20	1330.5	1330.5	1330.5	1330.5	1330.5	1330.5	1330.5		0	0	0	0	0	0	0	0	0	0	0	0		0	0	0	0	0	0		0	0	0	0	0	0		0	0	0	0	0	0
1900	2016-07-19	1318.8	1318.8	1318.8	1318.8	1318.8	1318.8	1318.8		0	0	0	0	0	0	0	0	0	0	0	0		0	0	0	0	0	0		0	0	0	0	0	0		0	0	0	0	0	0
1901	2016-07-18	1331.5	1331.5	1331.5	1331.5	1331.5	1331.5	1331.5		0	0	0	0	0	0	0	0	0	0	0	0		0	0	0	0	0	0		0	0	0	0	0	0		0	0	0	0	0	0
1902	2016-07-17	1328.4	1328.4	1328.4	1328.4	1328.4	1328.4	1328.4		0	0	0	0	0	0	0	0	0	0	0	0		0	0	0	0	0	0		0	0	0	0	0	0		0	0	0	0	0	0
1903	2016-07-14	1326.5	1326.5	1326.5	1326.5	1326.5	1326.5	1326.5		0	0	0	0	0	0	0	0	0	0	0	0		0	0	0	0	0	0		0	0	0	0	0	0		0	0	0	0	0	0
1904	2016-07-13	1331.3	1331.3	1331.3	1331.3	1331.3	1331.3	1331.3		0	0	0	0	0	0	0	0	0	0	0	0		0	0	0	0	0	0		0	0	0	0	0	0		0	0	0	0	0	0
1905	2016-07-12	1342.4	1342.4	1342.4	1342.4	1342.4	1342.4	1342.4		0	0	0	0	0	0	0	0	0	0	0	0		0	0	0	0	0	0		0	0	0	0	0	0		0	0	0	0	0	0
1906	2016-07-11	1334.1	1334.1	1334.1	1334.1	1334.1	1334.1	1334.1		0	0	0	0	0	0	0	0	0	0	0	0		0	0	0	0	0	0		0	0	0	0	0	0		0	0	0	0	0	0
1907	2016-07-10	1355	1355.0	1355.0	1355.0	1355.0	1355.0	1355.0		0	0	0	0	0	0	0	0	0	0	0	0		0	0	0	0	0	0		0	0	0	0	0	0		0	0	0	0	0	0
1908	2016-07-07	1356.6	1356.6	1356.6	1356.6	1356.6	1356.6	1356.6		0	0	0	0	0	0	0	0	0	0	0	0		0	0	0	0	0	0		0	0	0	0	0	0		0	0	0	0	0	0
1909	2016-07-06	1360.1	1360.1	1360.1	1360.1	1360.1	1360.1	1360.1		0	0	0	0	0	0	0	0	0	0	0	0		0	0	0	0	0	0		0	0	0	0	0	0		0	0	0	0	0	0
1910	2016-07-05	1364.9	1364.9	1364.9	1364.9	1364.9	1364.9	1364.9		0	0	0	0	0	0	0	0	0	0	0	0		0	0	0	0	0	0		0	0	0	0	0	0		0	0	0	0	0	0
1911	2016-07-04	1356.4	1356.4	1356.4	1356.4	1356.4	1356.4	1356.4		0	0	0	0	0	0	0	0	0	0	0	0		0	0	0	0	0	0		0	0	0	0	0	0		0	0	0	0	0	0
1912	2016-06-30	1336.7	1336.7	1336.7	1336.7	1336.7	1336.7	1336.7		0	0	0	0	0	0	0	0	0	0	0	0		0	0	0	0	0	0		0	0	0	0	0	0		0	0	0	0	0	0
1913	2016-06-29	1318.4	1318.4	1318.4	1318.4	1318.4	1318.4	1318.4		0	0	0	0	0	0	0	0	0	0	0	0		0	0	0	0	0	0		0	0	0	0	0	0		0	0	0	0	0	0
1914	2016-06-28	1323.9	1323.9	1323.9	1323.9	1323.9	1323.9	1323.9		0	0	0	0	0	0	0	0	0	0	0	0		0	0	0	0	0	0		0	0	0	0	0	0		0	0	0	0	0	0
1915	2016-06-27	1315.3	1315.3	1315.3	1315.3	1315.3	1315.3	1315.3		0	0	0	0	0	0	0	0	0	0	0	0		0	0	0	0	0	0		0	0	0	0	0	0		0	0	0	0	0	0
1916	2016-06-26	1322.5	1322.5	1322.5	1322.5	1322.5	1322.5	1322.5		0	0	0	0	0	0	0	0	0	0	0	0		0	0	0	0	0	0		0	0	0	0	0	0		0	0	0	0	0	0
1917	2016-06-23	1320	1320.0	1320.0	1320.0	1320.0	1320.0	1320.0		0	0	0	0	0	0	0	0	0	0	0	0		0	0	0	0	0	0		0	0	0	0	0	0		0	0	0	0	0	0
1918	2016-06-22	1261.2	1109.887	1264.096	1265.367	1261.310	1294.0	1133.308		-151.313	151.313	2.896	2.896	4.167	4.167	0.11	0.11	32.8	32.8	-127.892	127.892		22895.6	8.38682	17.3639	0.0121	1075.84	16356.4		0.119975	-0.00229623	-0.003304	-8.72185e-05	-0.026007	0.101405		0.119975	0.00229623	0.003304	8.72185e-05	0.026007	0.101405
1919	2016-06-21	1268	1268.0	1268.0	1268.0	1268.0	1268.0	1268.0		0	0	0	0	0	0	0	0	0	0	0	0		0	0	0	0	0	0		0	0	0	0	0	0		0	0	0	0	0	0
1920	2016-06-20	1270.5	1270.5	1270.5	1270.5	1270.5	1270.5	1270.5		0	0	0	0	0	0	0	0	0	0	0	0		0	0	0	0	0	0		0	0	0	0	0	0		0	0	0	0	0	0
1921	2016-06-19	1290	1290.0	1290.0	1290.0	1290.0	1290.0	1290.0		0	0	0	0	0	0	0	0	0	0	0	0		0	0	0	0	0	0		0	0	0	0	0	0		0	0	0	0	0	0
1922	2016-06-16	1292.5	1292.5	1292.5	1292.5	1292.5	1292.5	1292.5		0	0	0	0	0	0	0	0	0	0	0	0		0	0	0	0	0	0		0	0	0	0	0	0		0	0	0	0	0	0
1923	2016-06-15	1296.1	1296.1	1296.1	1296.1	1296.1	1296.1	1296.1		0	0	0	0	0	0	0	0	0	0	0	0		0	0	0	0	0	0		0	0	0	0	0	0		0	0	0	0	0	0
1924	2016-06-14	1285.8	1109.887	1294.291	1293.633	1292.531	1290.850	1135.166		-175.913	175.913	8.491	8.491	7.833	7.833	6.731	6.731	5.05	5.05	-150.634	150.634		30945.4	72.0971	61.3559	45.3064	25.5025	22690.6		0.136812	-0.00660367	-0.00609193	-0.00523487	-0.00392752	0.117152		0.136812	0.00660367	0.00609193	0.00523487	0.00392752	0.117152
1925	2016-06-13	1285.6	1285.6	1285.6	1285.6	1285.6	1285.6	1285.6		0	0	0	0	0	0	0	0	0	0	0	0		0	0	0	0	0	0		0	0	0	0	0	0		0	0	0	0	0	0
1926	2016-06-12	1284.4	1284.4	1284.4	1284.4	1284.4	1284.4	1284.4		0	0	0	0	0	0	0	0	0	0	0	0		0	0	0	0	0	0		0	0	0	0	0	0		0	0	0	0	0	0
1927	2016-06-09	1273.4	1273.4	1273.4	1273.4	1273.4	1273.4	1273.4		0	0	0	0	0	0	0	0	0	0	0	0		0	0	0	0	0	0		0	0	0	0	0	0		0	0	0	0	0	0
1928	2016-06-08	1270.2	1270.2	1270.2	1270.2	1270.2	1270.2	1270.2		0	0	0	0	0	0	0	0	0	0	0	0		0	0	0	0	0	0		0	0	0	0	0	0		0	0	0	0	0	0
1929	2016-06-07	1259.8	1109.887	1258.481	1256.067	1248.816	1257.3	1132.534		-149.913	149.913	-1.319	1.319	-3.733	3.733	-10.984	10.984	-2.5	2.5	-127.266	127.266		22473.9	1.73976	13.9353	120.648	6.25	16196.6		0.118997	0.00104699	0.00296317	0.00871884	0.00198444	0.101021		0.118997	0.00104699	0.00296317	0.00871884	0.00198444	0.101021
1930	2016-06-06	1244.4	1244.4	1244.4	1244.4	1244.4	1244.4	1244.4		0	0	0	0	0	0	0	0	0	0	0	0		0	0	0	0	0	0		0	0	0	0	0	0		0	0	0	0	0	0
1931	2016-06-05	1244.6	1244.6	1244.6	1244.6	1244.6	1244.6	1244.6		0	0	0	0	0	0	0	0	0	0	0	0		0	0	0	0	0	0		0	0	0	0	0	0		0	0	0	0	0	0
1932	2016-06-02	1240.1	1240.1	1240.1	1240.1	1240.1	1240.1	1240.1		0	0	0	0	0	0	0	0	0	0	0	0		0	0	0	0	0	0		0	0	0	0	0	0		0	0	0	0	0	0
1933	2016-06-01	1209.8	1209.8	1209.8	1209.8	1209.8	1209.8	1209.8		0	0	0	0	0	0	0	0	0	0	0	0		0	0	0	0	0	0		0	0	0	0	0	0		0	0	0	0	0	0
1934	2016-05-31	1211.9	1211.9	1211.9	1211.9	1211.9	1211.9	1211.9		0	0	0	0	0	0	0	0	0	0	0	0		0	0	0	0	0	0		0	0	0	0	0	0		0	0	0	0	0	0
1935	2016-05-30	1214.8	1214.8	1214.8	1214.8	1214.8	1214.8	1214.8		0	0	0	0	0	0	0	0	0	0	0	0		0	0	0	0	0	0		0	0	0	0	0	0		0	0	0	0	0	0
1936	2016-05-26	1213.8	1213.8	1213.8	1213.8	1213.8	1213.8	1213.8		0	0	0	0	0	0	0	0	0	0	0	0		0	0	0	0	0	0		0	0	0	0	0	0		0	0	0	0	0	0
1937	2016-05-25	1220.1	1220.1	1220.1	1220.1	1220.1	1220.1	1220.1		0	0	0	0	0	0	0	0	0	0	0	0		0	0	0	0	0	0		0	0	0	0	0	0		0	0	0	0	0	0
1938	2016-05-24	1223.5	1223.5	1223.5	1223.5	1223.5	1223.5	1223.5		0	0	0	0	0	0	0	0	0	0	0	0		0	0	0	0	0	0		0	0	0	0	0	0		0	0	0	0	0	0
1939	2016-05-23	1228.9	1109.887	1235.347	1234.3	1232.921	1237.3	1131.263		-119.013	119.013	6.447	6.447	5.4	5.4	4.021	4.021	8.4	8.4	-97.637	97.637		14164.1	41.5638	29.16	16.1684	70.56	9532.98		0.0968451	-0.00524616	-0.00439417	-0.00327203	-0.00683538	0.0794507		0.0968451	0.00524616	0.00439417	0.00327203	0.00683538	0.0794507
1940	2016-05-22	1251.1	1251.1	1251.1	1251.1	1251.1	1251.1	1251.1		0	0	0	0	0	0	0	0	0	0	0	0		0	0	0	0	0	0		0	0	0	0	0	0		0	0	0	0	0	0
1941	2016-05-19	1252.4	1252.4	1252.4	1252.4	1252.4	1252.4	1252.4		0	0	0	0	0	0	0	0	0	0	0	0		0	0	0	0	0	0		0	0	0	0	0	0		0	0	0	0	0	0
1942	2016-05-18	1254.2	1254.2	1254.2	1254.2	1254.2	1254.2	1254.2		0	0	0	0	0	0	0	0	0	0	0	0		0	0	0	0	0	0		0	0	0	0	0	0		0	0	0	0	0	0
1943	2016-05-17	1273.7	1273.7	1273.7	1273.7	1273.7	1273.7	1273.7		0	0	0	0	0	0	0	0	0	0	0	0		0	0	0	0	0	0		0	0	0	0	0	0		0	0	0	0	0	0
1944	2016-05-16	1276.2	1109.887	1275.040	1278.667	1275.275	1273.550	1134.243		-166.313	166.313	-1.16	1.16	2.467	2.467	-0.925	0.925	-2.65	2.65	-141.957	141.957		27660	1.3456	6.08609	0.855625	7.0225	20151.8		0.130319	0.000908948	-0.00193308	0.000724808	0.00207648	0.111234		0.130319	0.000908948	0.00193308	0.000724808	0.00207648	0.111234
1945	2016-05-15	1273.4	1273.4	1273.4	1273.4	1273.4	1273.4	1273.4		0	0	0	0	0	0	0	0	0	0	0	0		0	0	0	0	0	0		0	0	0	0	0	0		0	0	0	0	0	0
1946	2016-05-12	1271.9	1271.9	1271.9	1271.9	1271.9	1271.9	1271.9		0	0	0	0	0	0	0	0	0	0	0	0		0	0	0	0	0	0		0	0	0	0	0	0		0	0	0	0	0	0
1947	2016-05-11	1270.3	1270.3	1270.3	1270.3	1270.3	1270.3	1270.3		0	0	0	0	0	0	0	0	0	0	0	0		0	0	0	0	0	0		0	0	0	0	0	0		0	0	0	0	0	0
1948	2016-05-10	1274.6	1274.6	1274.6	1274.6	1274.6	1274.6	1274.6		0	0	0	0	0	0	0	0	0	0	0	0		0	0	0	0	0	0		0	0	0	0	0	0		0	0	0	0	0	0
1949	2016-05-09	1263.9	1263.9	1263.9	1263.9	1263.9	1263.9	1263.9		0	0	0	0	0	0	0	0	0	0	0	0		0	0	0	0	0	0		0	0	0	0	0	0		0	0	0	0	0	0
1950	2016-05-08	1265.6	1265.6	1265.6	1265.6	1265.6	1265.6	1265.6		0	0	0	0	0	0	0	0	0	0	0	0		0	0	0	0	0	0		0	0	0	0	0	0		0	0	0	0	0	0
1951	2016-05-05	1292.9	1292.9	1292.9	1292.9	1292.9	1292.9	1292.9		0	0	0	0	0	0	0	0	0	0	0	0		0	0	0	0	0	0		0	0	0	0	0	0		0	0	0	0	0	0
1952	2016-05-04	1271.4	1271.4	1271.4	1271.4	1271.4	1271.4	1271.4		0	0	0	0	0	0	0	0	0	0	0	0		0	0	0	0	0	0		0	0	0	0	0	0		0	0	0	0	0	0
1953	2016-05-03	1273.3	1273.3	1273.3	1273.3	1273.3	1273.3	1273.3		0	0	0	0	0	0	0	0	0	0	0	0		0	0	0	0	0	0		0	0	0	0	0	0		0	0	0	0	0	0
1954	2016-05-02	1290.7	1290.7	1290.7	1290.7	1290.7	1290.7	1290.7		0	0	0	0	0	0	0	0	0	0	0	0		0	0	0	0	0	0		0	0	0	0	0	0		0	0	0	0	0	0
1955	2016-05-01	1294.7	1294.7	1294.7	1294.7	1294.7	1294.7	1294.7		0	0	0	0	0	0	0	0	0	0	0	0		0	0	0	0	0	0		0	0	0	0	0	0		0	0	0	0	0	0
1956	2016-04-28	1289.2	1289.2	1289.2	1289.2	1289.2	1289.2	1289.2		0	0	0	0	0	0	0	0	0	0	0	0		0	0	0	0	0	0		0	0	0	0	0	0		0	0	0	0	0	0
1957	2016-04-27	1265.5	1109.887	1258.481	1264.933	1249.810	1269.2	1132.418		-155.613	155.613	-7.019	7.019	-0.567	0.567	-15.69	15.69	3.7	3.7	-133.082	133.082		24215.4	49.2664	0.321489	246.176	13.69	17710.8		0.122966	0.00554642	0.000448044	0.0123983	-0.00292375	0.105162		0.122966	0.00554642	0.000448044	0.0123983	0.00292375	0.105162
1958	2016-04-26	1249.2	1249.2	1249.2	1249.2	1249.2	1249.2	1249.2		0	0	0	0	0	0	0	0	0	0	0	0		0	0	0	0	0	0		0	0	0	0	0	0		0	0	0	0	0	0
1959	2016-04-25	1242.2	1242.2	1242.2	1242.2	1242.2	1242.2	1242.2		0	0	0	0	0	0	0	0	0	0	0	0		0	0	0	0	0	0		0	0	0	0	0	0		0	0	0	0	0	0
1960	2016-04-24	1238.9	1238.9	1238.9	1238.9	1238.9	1238.9	1238.9		0	0	0	0	0	0	0	0	0	0	0	0		0	0	0	0	0	0		0	0	0	0	0	0		0	0	0	0	0	0
1961	2016-04-21	1228.7	1109.887	1229.744	1239.767	1234.544	1246.475	1131.678		-118.813	118.813	1.044	1.044	11.067	11.067	5.844	5.844	17.775	17.775	-97.022	97.022		14116.5	1.08994	122.478	34.1523	315.951	9413.27		0.0966981	-0.000849679	-0.00900708	-0.00475625	-0.0144665	0.0789631		0.0966981	0.000849679	0.00900708	0.00475625	0.0144665	0.0789631
1962	2016-04-20	1249	1249.0	1249.0	1249.0	1249.0	1249.0	1249.0		0	0	0	0	0	0	0	0	0	0	0	0		0	0	0	0	0	0		0	0	0	0	0	0		0	0	0	0	0	0
1963	2016-04-19	1253.2	1253.2	1253.2	1253.2	1253.2	1253.2	1253.2		0	0	0	0	0	0	0	0	0	0	0	0		0	0	0	0	0	0		0	0	0	0	0	0		0	0	0	0	0	0
1964	2016-04-18	1253	1253.0	1253.0	1253.0	1253.0	1253.0	1253.0		0	0	0	0	0	0	0	0	0	0	0	0		0	0	0	0	0	0		0	0	0	0	0	0		0	0	0	0	0	0
1965	2016-04-17	1233.6	1233.6	1233.6	1233.6	1233.6	1233.6	1233.6		0	0	0	0	0	0	0	0	0	0	0	0		0	0	0	0	0	0		0	0	0	0	0	0		0	0	0	0	0	0
1966	2016-04-14	1233.1	1233.1	1233.1	1233.1	1233.1	1233.1	1233.1		0	0	0	0	0	0	0	0	0	0	0	0		0	0	0	0	0	0		0	0	0	0	0	0		0	0	0	0	0	0
1967	2016-04-13	1225	1225.0	1225.0	1225.0	1225.0	1225.0	1225.0		0	0	0	0	0	0	0	0	0	0	0	0		0	0	0	0	0	0		0	0	0	0	0	0		0	0	0	0	0	0
1968	2016-04-12	1246.8	1246.8	1246.8	1246.8	1246.8	1246.8	1246.8		0	0	0	0	0	0	0	0	0	0	0	0		0	0	0	0	0	0		0	0	0	0	0	0		0	0	0	0	0	0
1969	2016-04-11	1259.4	1259.4	1259.4	1259.4	1259.4	1259.4	1259.4		0	0	0	0	0	0	0	0	0	0	0	0		0	0	0	0	0	0		0	0	0	0	0	0		0	0	0	0	0	0
1970	2016-04-10	1256.7	1256.7	1256.7	1256.7	1256.7	1256.7	1256.7		0	0	0	0	0	0	0	0	0	0	0	0		0	0	0	0	0	0		0	0	0	0	0	0		0	0	0	0	0	0
1971	2016-04-07	1242.5	1242.5	1242.5	1242.5	1242.5	1242.5	1242.5		0	0	0	0	0	0	0	0	0	0	0	0		0	0	0	0	0	0		0	0	0	0	0	0		0	0	0	0	0	0
1972	2016-04-06	1236.2	1236.2	1236.2	1236.2	1236.2	1236.2	1236.2		0	0	0	0	0	0	0	0	0	0	0	0		0	0	0	0	0	0		0	0	0	0	0	0		0	0	0	0	0	0
1973	2016-04-05	1222.5	1222.5	1222.5	1222.5	1222.5	1222.5	1222.5		0	0	0	0	0	0	0	0	0	0	0	0		0	0	0	0	0	0		0	0	0	0	0	0		0	0	0	0	0	0
1974	2016-04-04	1228.4	1228.4	1228.4	1228.4	1228.4	1228.4	1228.4		0	0	0	0	0	0	0	0	0	0	0	0		0	0	0	0	0	0		0	0	0	0	0	0		0	0	0	0	0	0
1975	2016-04-03	1218	1218.0	1218.0	1218.0	1218.0	1218.0	1218.0		0	0	0	0	0	0	0	0	0	0	0	0		0	0	0	0	0	0		0	0	0	0	0	0		0	0	0	0	0	0
1976	2016-03-31	1222.2	1222.2	1222.2	1222.2	1222.2	1222.2	1222.2		0	0	0	0	0	0	0	0	0	0	0	0		0	0	0	0	0	0		0	0	0	0	0	0		0	0	0	0	0	0
1977	2016-03-30	1234.2	1234.2	1234.2	1234.2	1234.2	1234.2	1234.2		0	0	0	0	0	0	0	0	0	0	0	0		0	0	0	0	0	0		0	0	0	0	0	0		0	0	0	0	0	0
1978	2016-03-29	1226.9	1226.9	1226.9	1226.9	1226.9	1226.9	1226.9		0	0	0	0	0	0	0	0	0	0	0	0		0	0	0	0	0	0		0	0	0	0	0	0		0	0	0	0	0	0
1979	2016-03-28	1235.6	1109.887	1230.273	1233.1	1230.348	1225.983	1130.350		-125.713	125.713	-5.327	5.327	-2.5	2.5	-5.252	5.252	-9.617	9.617	-105.25	105.25		15803.8	28.3769	6.25	27.5835	92.4867	11077.6		0.101742	0.00431127	0.00202331	0.00425057	0.00778326	0.0851813		0.101742	0.00431127	0.00202331	0.00425057	0.00778326	0.0851813
1980	2016-03-27	1219.9	1109.887	1217.517	1219.533	1216.992	1225.067	1129.687		-110.013	110.013	-2.383	2.383	-0.367	0.367	-2.908	2.908	5.167	5.167	-90.213	90.213		12102.9	5.67869	0.134689	8.45646	26.6979	8138.39		0.090182	0.00195344	0.000300844	0.0023838	-0.00423559	0.0739511		0.090182	0.00195344	0.000300844	0.0023838	0.00423559	0.0739511
1981	2016-03-23	1221.4	1221.4	1221.4	1221.4	1221.4	1221.4	1221.4		0	0	0	0	0	0	0	0	0	0	0	0		0	0	0	0	0	0		0	0	0	0	0	0		0	0	0	0	0	0
1982	2016-03-22	1223.7	1223.7	1223.7	1223.7	1223.7	1223.7	1223.7		0	0	0	0	0	0	0	0	0	0	0	0		0	0	0	0	0	0		0	0	0	0	0	0		0	0	0	0	0	0
1983	2016-03-21	1248.2	1248.2	1248.2	1248.2	1248.2	1248.2	1248.2		0	0	0	0	0	0	0	0	0	0	0	0		0	0	0	0	0	0		0	0	0	0	0	0		0	0	0	0	0	0
1984	2016-03-20	1243.8	1243.8	1243.8	1243.8	1243.8	1243.8	1243.8		0	0	0	0	0	0	0	0	0	0	0	0		0	0	0	0	0	0		0	0	0	0	0	0		0	0	0	0	0	0
1985	2016-03-17	1253.8	1253.8	1253.8	1253.8	1253.8	1253.8	1253.8		0	0	0	0	0	0	0	0	0	0	0	0		0	0	0	0	0	0		0	0	0	0	0	0		0	0	0	0	0	0
1986	2016-03-16	1264.5	1264.5	1264.5	1264.5	1264.5	1264.5	1264.5		0	0	0	0	0	0	0	0	0	0	0	0		0	0	0	0	0	0		0	0	0	0	0	0		0	0	0	0	0	0
1987	2016-03-15	1229.3	1229.3	1229.3	1229.3	1229.3	1229.3	1229.3		0	0	0	0	0	0	0	0	0	0	0	0		0	0	0	0	0	0		0	0	0	0	0	0		0	0	0	0	0	0
1988	2016-03-14	1230.4	1230.4	1230.4	1230.4	1230.4	1230.4	1230.4		0	0	0	0	0	0	0	0	0	0	0	0		0	0	0	0	0	0		0	0	0	0	0	0		0	0	0	0	0	0
1989	2016-03-13	1244.4	1109.887	1246.506	1245.167	1246.150	1239.833	1132.268		-134.513	134.513	2.106	2.106	0.767	0.767	1.75	1.75	-4.567	4.567	-112.132	112.132		18093.7	4.43524	0.588289	3.0625	20.8575	12573.6		0.108095	-0.00169238	-0.000616361	-0.0014063	0.00367004	0.0901093		0.108095	0.00169238	0.000616361	0.0014063	0.00367004	0.0901093
1990	2016-03-11	1258.7	1258.7	1258.7	1258.7	1258.7	1258.7	1258.7		0	0	0	0	0	0	0	0	0	0	0	0		0	0	0	0	0	0		0	0	0	0	0	0		0	0	0	0	0	0
1991	2016-03-10	1272	1272.0	1272.0	1272.0	1272.0	1272.0	1272.0		0	0	0	0	0	0	0	0	0	0	0	0		0	0	0	0	0	0		0	0	0	0	0	0		0	0	0	0	0	0
1992	2016-03-09	1256.6	1256.6	1256.6	1256.6	1256.6	1256.6	1256.6		0	0	0	0	0	0	0	0	0	0	0	0		0	0	0	0	0	0		0	0	0	0	0	0		0	0	0	0	0	0
1993	2016-03-08	1262.1	1262.1	1262.1	1262.1	1262.1	1262.1	1262.1		0	0	0	0	0	0	0	0	0	0	0	0		0	0	0	0	0	0		0	0	0	0	0	0		0	0	0	0	0	0
1994	2016-03-07	1263.2	1263.2	1263.2	1263.2	1263.2	1263.2	1263.2		0	0	0	0	0	0	0	0	0	0	0	0		0	0	0	0	0	0		0	0	0	0	0	0		0	0	0	0	0	0
1995	2016-03-04	1269.9	1269.9	1269.9	1269.9	1269.9	1269.9	1269.9		0	0	0	0	0	0	0	0	0	0	0	0		0	0	0	0	0	0		0	0	0	0	0	0		0	0	0	0	0	0
1996	2016-03-03	1257.4	1257.4	1257.4	1257.4	1257.4	1257.4	1257.4		0	0	0	0	0	0	0	0	0	0	0	0		0	0	0	0	0	0		0	0	0	0	0	0		0	0	0	0	0	0
1997	2016-03-02	1241.1	1241.1	1241.1	1241.1	1241.1	1241.1	1241.1		0	0	0	0	0	0	0	0	0	0	0	0		0	0	0	0	0	0		0	0	0	0	0	0		0	0	0	0	0	0
1998	2016-03-01	1230.3	1109.887	1245.400	1243.4	1241.105	1237.5	1131.503		-120.413	120.413	15.1	15.1	13.1	13.1	10.805	10.805	7.2	7.2	-98.797	98.797		14499.3	228.01	171.61	116.748	51.84	9760.85		0.0978729	-0.0122734	-0.0106478	-0.00878241	-0.00585223	0.0803032		0.0978729	0.0122734	0.0106478	0.00878241	0.00585223	0.0803032
1999	2016-02-29	1233.9	1233.9	1233.9	1233.9	1233.9	1233.9	1233.9		0	0	0	0	0	0	0	0	0	0	0	0		0	0	0	0	0	0		0	0	0	0	0	0		0	0	0	0	0	0
[truncated: 3,884 more rows]

## Sheet: 20%
Num	Date	Original	Mean	Hot&Deck	KNN	Random Forest	Spline	SVM		diff1-mean	abs diff2-mean	diff1-hot	abs diff2-hot	diff1-knn	abs diff2-knn	diff1-random	abs diff2-random	diff1-spline	abs diff2-spline	diff1-svm	abs diff2-svm		diff3-mean	diff3-hot	diff3-knn	diff3-random	diff3-spline	diff3-svm		diff4-mean	diff4-hot	diff4-knn	diff4-random	diff4-spline	diff4-svm		diff5-mean	diff5-hot	diff5-knn	diff5-random	diff5-spline	diff5-svm
1	2024-02-07	2035.2	2035.2	2035.2	2035.2	2035.2	2035.2	2035.2		0	0	0	0	0	0	0	0	0	0	0	0		0	0	0	0	0	0		0	0	0	0	0	0		0	0	0	0	0	0
2	2024-02-06	2034.5	1115.325	2033.075	2030.9	2030.949	2035.380	1205.600		-919.175	919.175	-1.425	1.425	-3.6	3.6	-3.551	3.551	0.88	0.88	-828.9	828.9		844883	2.03062	12.96	12.6096	0.7744	687075		0.451794	0.000700418	0.00176948	0.00174539	-0.000432539	0.407422		0.451794	0.000700418	0.00176948	0.00174539	0.000432539	0.407422
3	2024-02-05	2025.7	1115.325	2021.629	2017.733	2022.011	2035.560	1205.582		-910.375	910.375	-4.071	4.071	-7.967	7.967	-3.689	3.689	9.86	9.86	-820.118	820.118		828783	16.573	63.4731	13.6087	97.2196	672594		0.449413	0.00200968	0.00393296	0.0018211	-0.00486745	0.404857		0.449413	0.00200968	0.00393296	0.0018211	0.00486745	0.404857
4	2024-02-02	2036.1	2036.1	2036.1	2036.1	2036.1	2036.1	2036.1		0	0	0	0	0	0	0	0	0	0	0	0		0	0	0	0	0	0		0	0	0	0	0	0		0	0	0	0	0	0
5	2024-02-01	2053	1115.325	2036.400	2055.8	2043.403	2042.250	1205.429		-937.675	937.675	-16.6	16.6	2.8	2.8	-9.597	9.597	-10.75	10.75	-847.571	847.571		879234	275.56	7.84	92.1024	115.562	718377		0.456734	0.00808573	-0.00136386	0.00467462	0.00523624	0.412845		0.456734	0.00808573	0.00136386	0.00467462	0.00523624	0.412845
6	2024-01-31	2048.4	2048.4	2048.4	2048.4	2048.4	2048.4	2048.4		0	0	0	0	0	0	0	0	0	0	0	0		0	0	0	0	0	0		0	0	0	0	0	0		0	0	0	0	0	0
7	2024-01-30	2031.5	2031.5	2031.5	2031.5	2031.5	2031.5	2031.5		0	0	0	0	0	0	0	0	0	0	0	0		0	0	0	0	0	0		0	0	0	0	0	0		0	0	0	0	0	0
8	2024-01-29	2025.2	2025.2	2025.2	2025.2	2025.2	2025.2	2025.2		0	0	0	0	0	0	0	0	0	0	0	0		0	0	0	0	0	0		0	0	0	0	0	0		0	0	0	0	0	0
9	2024-01-26	2016.8	2016.8	2016.8	2016.8	2016.8	2016.8	2016.8		0	0	0	0	0	0	0	0	0	0	0	0		0	0	0	0	0	0		0	0	0	0	0	0		0	0	0	0	0	0
10	2024-01-25	2016.9	1115.325	2016.923	2017.033	2015.162	2015.350	1205.635		-901.575	901.575	0.023	0.023	0.133	0.133	-1.738	1.738	-1.55	1.55	-811.265	811.265		812837	0.000529	0.017689	3.02064	2.4025	658151		0.44701	-1.14036e-05	-6.59428e-05	0.000861718	0.000768506	0.402234		0.44701	1.14036e-05	6.59428e-05	0.000861718	0.000768506	0.402234
11	2024-01-24	2013.9	2013.9	2013.9	2013.9	2013.9	2013.9	2013.9		0	0	0	0	0	0	0	0	0	0	0	0		0	0	0	0	0	0		0	0	0	0	0	0		0	0	0	0	0	0
12	2024-01-23	2023.7	1115.325	2016.923	2024.4	2022.982	2016.850	1205.609		-908.375	908.375	-6.777	6.777	0.7	0.7	-0.718	0.718	-6.85	6.85	-818.091	818.091		825145	45.9277	0.49	0.515524	46.9225	669273		0.448868	0.00334882	-0.000345901	0.000354796	0.00338489	0.404255		0.448868	0.00334882	0.000345901	0.000354796	0.00338489	0.404255
13	2024-01-22	2019.8	2019.8	2019.8	2019.8	2019.8	2019.8	2019.8		0	0	0	0	0	0	0	0	0	0	0	0		0	0	0	0	0	0		0	0	0	0	0	0		0	0	0	0	0	0
14	2024-01-19	2026.5	1115.325	2033.075	2027.8	2026.681	2018.9	1205.623		-911.175	911.175	6.575	6.575	1.3	1.3	0.181	0.181	-7.6	7.6	-820.877	820.877		830240	43.2306	1.69	0.032761	57.76	673839		0.44963	-0.00324451	-0.0006415	-8.93166e-05	0.00375031	0.405071		0.44963	0.00324451	0.0006415	8.93166e-05	0.00375031	0.405071
15	2024-01-18	2018.6	2018.6	2018.6	2018.6	2018.6	2018.6	2018.6		0	0	0	0	0	0	0	0	0	0	0	0		0	0	0	0	0	0		0	0	0	0	0	0		0	0	0	0	0	0
16	2024-01-17	2002.6	2002.6	2002.6	2002.6	2002.6	2002.6	2002.6		0	0	0	0	0	0	0	0	0	0	0	0		0	0	0	0	0	0		0	0	0	0	0	0		0	0	0	0	0	0
17	2024-01-16	2026	2026.0	2026.0	2026.0	2026.0	2026.0	2026.0		0	0	0	0	0	0	0	0	0	0	0	0		0	0	0	0	0	0		0	0	0	0	0	0		0	0	0	0	0	0
18	2024-01-15	2054.8	1115.325	2057.367	2052.567	2049.459	2023.660	1205.286		-939.475	939.475	2.567	2.567	-2.233	2.233	-5.341	5.341	-31.14	31.14	-849.514	849.514		882613	6.58949	4.98629	28.5263	969.7	721674		0.45721	-0.00124927	0.00108672	0.00259928	0.0151548	0.413429		0.45721	0.00124927	0.00108672	0.00259928	0.0151548	0.413429
19	2024-01-12	2046.7	1115.325	2036.400	2042.333	2039.870	2016.640	1205.498		-931.375	931.375	-10.3	10.3	-4.367	4.367	-6.83	6.83	-30.06	30.06	-841.202	841.202		867459	106.09	19.0707	46.6489	903.604	707621		0.455062	0.00503249	0.00213368	0.00333708	0.0146871	0.411004		0.455062	0.00503249	0.00213368	0.00333708	0.0146871	0.411004
20	2024-01-11	2014.3	2014.3	2014.3	2014.3	2014.3	2014.3	2014.3		0	0	0	0	0	0	0	0	0	0	0	0		0	0	0	0	0	0		0	0	0	0	0	0		0	0	0	0	0	0
21	2024-01-10	2021.7	2021.7	2021.7	2021.7	2021.7	2021.7	2021.7		0	0	0	0	0	0	0	0	0	0	0	0		0	0	0	0	0	0		0	0	0	0	0	0		0	0	0	0	0	0
22	2024-01-09	2026.4	2026.4	2026.4	2026.4	2026.4	2026.4	2026.4		0	0	0	0	0	0	0	0	0	0	0	0		0	0	0	0	0	0		0	0	0	0	0	0		0	0	0	0	0	0
23	2024-01-08	2026.6	2026.6	2026.6	2026.6	2026.6	2026.6	2026.6		0	0	0	0	0	0	0	0	0	0	0	0		0	0	0	0	0	0		0	0	0	0	0	0		0	0	0	0	0	0
24	2024-01-05	2042.4	2042.4	2042.4	2042.4	2042.4	2042.4	2042.4		0	0	0	0	0	0	0	0	0	0	0	0		0	0	0	0	0	0		0	0	0	0	0	0		0	0	0	0	0	0
25	2024-01-04	2042.3	2042.3	2042.3	2042.3	2042.3	2042.3	2042.3		0	0	0	0	0	0	0	0	0	0	0	0		0	0	0	0	0	0		0	0	0	0	0	0		0	0	0	0	0	0
26	2024-01-03	2034.2	2034.2	2034.2	2034.2	2034.2	2034.2	2034.2		0	0	0	0	0	0	0	0	0	0	0	0		0	0	0	0	0	0		0	0	0	0	0	0		0	0	0	0	0	0
27	2024-01-02	2064.4	2064.4	2064.4	2064.4	2064.4	2064.4	2064.4		0	0	0	0	0	0	0	0	0	0	0	0		0	0	0	0	0	0		0	0	0	0	0	0		0	0	0	0	0	0
28	2023-12-29	2062.4	2062.4	2062.4	2062.4	2062.4	2062.4	2062.4		0	0	0	0	0	0	0	0	0	0	0	0		0	0	0	0	0	0		0	0	0	0	0	0		0	0	0	0	0	0
29	2023-12-28	2073.9	2073.9	2073.9	2073.9	2073.9	2073.9	2073.9		0	0	0	0	0	0	0	0	0	0	0	0		0	0	0	0	0	0		0	0	0	0	0	0		0	0	0	0	0	0
30	2023-12-27	2081.9	2081.9	2081.9	2081.9	2081.9	2081.9	2081.9		0	0	0	0	0	0	0	0	0	0	0	0		0	0	0	0	0	0		0	0	0	0	0	0		0	0	0	0	0	0
31	2023-12-26	2058.2	2058.2	2058.2	2058.2	2058.2	2058.2	2058.2		0	0	0	0	0	0	0	0	0	0	0	0		0	0	0	0	0	0		0	0	0	0	0	0		0	0	0	0	0	0
32	2023-12-22	2057.1	2057.1	2057.1	2057.1	2057.1	2057.1	2057.1		0	0	0	0	0	0	0	0	0	0	0	0		0	0	0	0	0	0		0	0	0	0	0	0		0	0	0	0	0	0
33	2023-12-21	2039.1	2039.1	2039.1	2039.1	2039.1	2039.1	2039.1		0	0	0	0	0	0	0	0	0	0	0	0		0	0	0	0	0	0		0	0	0	0	0	0		0	0	0	0	0	0
34	2023-12-20	2034.5	2034.5	2034.5	2034.5	2034.5	2034.5	2034.5		0	0	0	0	0	0	0	0	0	0	0	0		0	0	0	0	0	0		0	0	0	0	0	0		0	0	0	0	0	0
35	2023-12-19	2038.4	1115.325	2033.075	2032.3	2031.616	2030.4	1205.591		-923.075	923.075	-5.325	5.325	-6.1	6.1	-6.784	6.784	-8	8	-832.809	832.809		852067	28.3556	37.21	46.0227	64	693571		0.452843	0.00261234	0.00299254	0.0033281	0.00392465	0.40856		0.452843	0.00261234	0.00299254	0.0033281	0.00392465	0.40856
36	2023-12-18	2026.3	2026.3	2026.3	2026.3	2026.3	2026.3	2026.3		0	0	0	0	0	0	0	0	0	0	0	0		0	0	0	0	0	0		0	0	0	0	0	0		0	0	0	0	0	0
37	2023-12-15	2021.1	2021.1	2021.1	2021.1	2021.1	2021.1	2021.1		0	0	0	0	0	0	0	0	0	0	0	0		0	0	0	0	0	0		0	0	0	0	0	0		0	0	0	0	0	0
38	2023-12-14	2030.2	2030.2	2030.2	2030.2	2030.2	2030.2	2030.2		0	0	0	0	0	0	0	0	0	0	0	0		0	0	0	0	0	0		0	0	0	0	0	0		0	0	0	0	0	0
39	2023-12-13	1982.3	1115.325	2001.629	2000.867	2006.826	2004.0	1205.377		-866.975	866.975	19.329	19.329	18.567	18.567	24.526	24.526	21.7	21.7	-776.923	776.923		751646	373.61	344.733	601.525	470.89	603609		0.437358	-0.00975079	-0.00936639	-0.0123725	-0.0109469	0.39193		0.437358	0.00975079	0.00936639	0.0123725	0.0109469	0.39193
40	2023-12-12	1977.8	1977.8	1977.8	1977.8	1977.8	1977.8	1977.8		0	0	0	0	0	0	0	0	0	0	0	0		0	0	0	0	0	0		0	0	0	0	0	0		0	0	0	0	0	0
41	2023-12-11	1978	1978.0	1978.0	1978.0	1978.0	1978.0	1978.0		0	0	0	0	0	0	0	0	0	0	0	0		0	0	0	0	0	0		0	0	0	0	0	0		0	0	0	0	0	0
42	2023-12-08	1998.3	1998.3	1998.3	1998.3	1998.3	1998.3	1998.3		0	0	0	0	0	0	0	0	0	0	0	0		0	0	0	0	0	0		0	0	0	0	0	0		0	0	0	0	0	0
43	2023-12-07	2029.9	1115.325	2021.629	2028.067	2023.005	2014.4	1205.603		-914.575	914.575	-8.271	8.271	-1.833	1.833	-6.895	6.895	-15.5	15.5	-824.297	824.297		836447	68.4094	3.35989	47.541	240.25	679466		0.450552	0.00407458	0.000903	0.00339672	0.00763584	0.406078		0.450552	0.00407458	0.000903	0.00339672	0.00763584	0.406078
44	2023-12-06	2030.5	2030.5	2030.5	2030.5	2030.5	2030.5	2030.5		0	0	0	0	0	0	0	0	0	0	0	0		0	0	0	0	0	0		0	0	0	0	0	0		0	0	0	0	0	0
45	2023-12-05	2018.5	1115.325	2021.629	2016.567	2016.665	2027.3	1205.606		-903.175	903.175	3.129	3.129	-1.933	1.933	-1.835	1.835	8.8	8.8	-812.894	812.894		815725	9.79064	3.73649	3.36723	77.44	660797		0.447449	-0.00155016	0.000957642	0.000909091	-0.00435967	0.402722		0.447449	0.00155016	0.000957642	0.000909091	0.00435967	0.402722
46	2023-12-04	2024.1	2024.1	2024.1	2024.1	2024.1	2024.1	2024.1		0	0	0	0	0	0	0	0	0	0	0	0		0	0	0	0	0	0		0	0	0	0	0	0		0	0	0	0	0	0
47	2023-12-01	2071	2071.0	2071.0	2071.0	2071.0	2071.0	2071.0		0	0	0	0	0	0	0	0	0	0	0	0		0	0	0	0	0	0		0	0	0	0	0	0		0	0	0	0	0	0
48	2023-11-30	2038.1	2038.1	2038.1	2038.1	2038.1	2038.1	2038.1		0	0	0	0	0	0	0	0	0	0	0	0		0	0	0	0	0	0		0	0	0	0	0	0		0	0	0	0	0	0
49	2023-11-29	2047.1	2047.1	2047.1	2047.1	2047.1	2047.1	2047.1		0	0	0	0	0	0	0	0	0	0	0	0		0	0	0	0	0	0		0	0	0	0	0	0		0	0	0	0	0	0
50	2023-11-28	2039.7	2039.7	2039.7	2039.7	2039.7	2039.7	2039.7		0	0	0	0	0	0	0	0	0	0	0	0		0	0	0	0	0	0		0	0	0	0	0	0		0	0	0	0	0	0
51	2023-11-27	2011.8	2011.8	2011.8	2011.8	2011.8	2011.8	2011.8		0	0	0	0	0	0	0	0	0	0	0	0		0	0	0	0	0	0		0	0	0	0	0	0		0	0	0	0	0	0
52	2023-11-24	2002.2	2002.2	2002.2	2002.2	2002.2	2002.2	2002.2		0	0	0	0	0	0	0	0	0	0	0	0		0	0	0	0	0	0		0	0	0	0	0	0		0	0	0	0	0	0
53	2023-11-23	1991.5	1991.5	1991.5	1991.5	1991.5	1991.5	1991.5		0	0	0	0	0	0	0	0	0	0	0	0		0	0	0	0	0	0		0	0	0	0	0	0		0	0	0	0	0	0
54	2023-11-22	1991.4	1991.4	1991.4	1991.4	1991.4	1991.4	1991.4		0	0	0	0	0	0	0	0	0	0	0	0		0	0	0	0	0	0		0	0	0	0	0	0		0	0	0	0	0	0
55	2023-11-21	1999.3	1999.3	1999.3	1999.3	1999.3	1999.3	1999.3		0	0	0	0	0	0	0	0	0	0	0	0		0	0	0	0	0	0		0	0	0	0	0	0		0	0	0	0	0	0
56	2023-11-20	1977.7	1977.7	1977.7	1977.7	1977.7	1977.7	1977.7		0	0	0	0	0	0	0	0	0	0	0	0		0	0	0	0	0	0		0	0	0	0	0	0		0	0	0	0	0	0
57	2023-11-17	1981.6	1981.6	1981.6	1981.6	1981.6	1981.6	1981.6		0	0	0	0	0	0	0	0	0	0	0	0		0	0	0	0	0	0		0	0	0	0	0	0		0	0	0	0	0	0
58	2023-11-16	1983.9	1983.9	1983.9	1983.9	1983.9	1983.9	1983.9		0	0	0	0	0	0	0	0	0	0	0	0		0	0	0	0	0	0		0	0	0	0	0	0		0	0	0	0	0	0
59	2023-11-15	1960.1	1960.1	1960.1	1960.1	1960.1	1960.1	1960.1		0	0	0	0	0	0	0	0	0	0	0	0		0	0	0	0	0	0		0	0	0	0	0	0		0	0	0	0	0	0
60	2023-11-14	1961.8	1961.8	1961.8	1961.8	1961.8	1961.8	1961.8		0	0	0	0	0	0	0	0	0	0	0	0		0	0	0	0	0	0		0	0	0	0	0	0		0	0	0	0	0	0
61	2023-11-13	1945.5	1945.5	1945.5	1945.5	1945.5	1945.5	1945.5		0	0	0	0	0	0	0	0	0	0	0	0		0	0	0	0	0	0		0	0	0	0	0	0		0	0	0	0	0	0
62	2023-11-10	1932.6	1932.6	1932.6	1932.6	1932.6	1932.6	1932.6		0	0	0	0	0	0	0	0	0	0	0	0		0	0	0	0	0	0		0	0	0	0	0	0		0	0	0	0	0	0
63	2023-11-09	1964.2	1964.2	1964.2	1964.2	1964.2	1964.2	1964.2		0	0	0	0	0	0	0	0	0	0	0	0		0	0	0	0	0	0		0	0	0	0	0	0		0	0	0	0	0	0
64	2023-11-08	1951.5	1951.5	1951.5	1951.5	1951.5	1951.5	1951.5		0	0	0	0	0	0	0	0	0	0	0	0		0	0	0	0	0	0		0	0	0	0	0	0		0	0	0	0	0	0
65	2023-11-07	1966.8	1966.8	1966.8	1966.8	1966.8	1966.8	1966.8		0	0	0	0	0	0	0	0	0	0	0	0		0	0	0	0	0	0		0	0	0	0	0	0		0	0	0	0	0	0
66	2023-11-06	1981.6	1981.6	1981.6	1981.6	1981.6	1981.6	1981.6		0	0	0	0	0	0	0	0	0	0	0	0		0	0	0	0	0	0		0	0	0	0	0	0		0	0	0	0	0	0
67	2023-11-02	1991.5	1991.5	1991.5	1991.5	1991.5	1991.5	1991.5		0	0	0	0	0	0	0	0	0	0	0	0		0	0	0	0	0	0		0	0	0	0	0	0		0	0	0	0	0	0
68	2023-11-01	1985.6	1985.6	1985.6	1985.6	1985.6	1985.6	1985.6		0	0	0	0	0	0	0	0	0	0	0	0		0	0	0	0	0	0		0	0	0	0	0	0		0	0	0	0	0	0
69	2023-10-31	1978.8	1978.8	1978.8	1978.8	1978.8	1978.8	1978.8		0	0	0	0	0	0	0	0	0	0	0	0		0	0	0	0	0	0		0	0	0	0	0	0		0	0	0	0	0	0
70	2023-10-30	1985.2	1985.2	1985.2	1985.2	1985.2	1985.2	1985.2		0	0	0	0	0	0	0	0	0	0	0	0		0	0	0	0	0	0		0	0	0	0	0	0		0	0	0	0	0	0
71	2023-10-29	1996.2	1996.2	1996.2	1996.2	1996.2	1996.2	1996.2		0	0	0	0	0	0	0	0	0	0	0	0		0	0	0	0	0	0		0	0	0	0	0	0		0	0	0	0	0	0
72	2023-10-26	1988.6	1988.6	1988.6	1988.6	1988.6	1988.6	1988.6		0	0	0	0	0	0	0	0	0	0	0	0		0	0	0	0	0	0		0	0	0	0	0	0		0	0	0	0	0	0
73	2023-10-25	1987.2	1987.2	1987.2	1987.2	1987.2	1987.2	1987.2		0	0	0	0	0	0	0	0	0	0	0	0		0	0	0	0	0	0		0	0	0	0	0	0		0	0	0	0	0	0
74	2023-10-24	1984.1	1984.1	1984.1	1984.1	1984.1	1984.1	1984.1		0	0	0	0	0	0	0	0	0	0	0	0		0	0	0	0	0	0		0	0	0	0	0	0		0	0	0	0	0	0
75	2023-10-23	1975	1975.0	1975.0	1975.0	1975.0	1975.0	1975.0		0	0	0	0	0	0	0	0	0	0	0	0		0	0	0	0	0	0		0	0	0	0	0	0		0	0	0	0	0	0
76	2023-10-22	1976.3	1976.3	1976.3	1976.3	1976.3	1976.3	1976.3		0	0	0	0	0	0	0	0	0	0	0	0		0	0	0	0	0	0		0	0	0	0	0	0		0	0	0	0	0	0
77	2023-10-19	1982.5	1982.5	1982.5	1982.5	1982.5	1982.5	1982.5		0	0	0	0	0	0	0	0	0	0	0	0		0	0	0	0	0	0		0	0	0	0	0	0		0	0	0	0	0	0
78	2023-10-18	1968.4	1968.4	1968.4	1968.4	1968.4	1968.4	1968.4		0	0	0	0	0	0	0	0	0	0	0	0		0	0	0	0	0	0		0	0	0	0	0	0		0	0	0	0	0	0
79	2023-10-17	1955.3	1955.3	1955.3	1955.3	1955.3	1955.3	1955.3		0	0	0	0	0	0	0	0	0	0	0	0		0	0	0	0	0	0		0	0	0	0	0	0		0	0	0	0	0	0
80	2023-10-16	1922.7	1922.7	1922.7	1922.7	1922.7	1922.7	1922.7		0	0	0	0	0	0	0	0	0	0	0	0		0	0	0	0	0	0		0	0	0	0	0	0		0	0	0	0	0	0
81	2023-10-15	1921.1	1921.1	1921.1	1921.1	1921.1	1921.1	1921.1		0	0	0	0	0	0	0	0	0	0	0	0		0	0	0	0	0	0		0	0	0	0	0	0		0	0	0	0	0	0
82	2023-10-12	1927.4	1927.4	1927.4	1927.4	1927.4	1927.4	1927.4		0	0	0	0	0	0	0	0	0	0	0	0		0	0	0	0	0	0		0	0	0	0	0	0		0	0	0	0	0	0
83	2023-10-11	1869.3	1115.325	1880.857	1874.867	1870.011	1905.267	1199.833		-753.975	753.975	11.557	11.557	5.567	5.567	0.711	0.711	35.967	35.967	-669.467	669.467		568478	133.564	30.9915	0.505521	1293.63	448186		0.403346	-0.00618253	-0.00297812	-0.000380356	-0.0192409	0.358138		0.403346	0.00618253	0.00297812	0.000380356	0.0192409	0.358138
84	2023-10-10	1872.8	1115.325	1874.914	1872.2	1870.468	1883.133	1199.574		-757.475	757.475	2.114	2.114	-0.6	0.6	-2.332	2.332	10.333	10.333	-673.226	673.226		573768	4.469	0.36	5.43822	106.771	453233		0.404461	-0.00112879	0.000320376	0.00124519	-0.00551741	0.359476		0.404461	0.00112879	0.000320376	0.00124519	0.00551741	0.359476
85	2023-10-09	1861	1861.0	1861.0	1861.0	1861.0	1861.0	1861.0		0	0	0	0	0	0	0	0	0	0	0	0		0	0	0	0	0	0		0	0	0	0	0	0		0	0	0	0	0	0
86	2023-10-08	1849.5	1115.325	1854.756	1850.633	1852.715	1853.917	1197.702		-734.175	734.175	5.256	5.256	1.133	1.133	3.215	3.215	4.417	4.417	-651.798	651.798		539013	27.6255	1.28369	10.3362	19.5099	424841		0.396959	-0.00284185	-0.000612598	-0.00173831	-0.00238821	0.352418		0.396959	0.00284185	0.000612598	0.00173831	0.00238821	0.352418
87	2023-10-05	1830.2	1115.325	1825.780	1828.433	1823.579	1832.667	1194.977		-714.875	714.875	-4.42	4.42	-1.767	1.767	-6.621	6.621	2.467	2.467	-635.223	635.223		511046	19.5364	3.12229	43.8376	6.08609	403508		0.390599	0.00241504	0.000965468	0.00361764	-0.00134794	0.347078		0.390599	0.00241504	0.000965468	0.00361764	0.00134794	0.347078
88	2023-10-04	1816.6	1115.325	1818.273	1817.9	1818.098	1825.583	1195.243		-701.275	701.275	1.673	1.673	1.3	1.3	1.498	1.498	8.983	8.983	-621.357	621.357		491787	2.79893	1.69	2.244	80.6943	386085		0.386037	-0.000920951	-0.000715623	-0.000824617	-0.00494495	0.342044		0.386037	0.000920951	0.000715623	0.000824617	0.00494495	0.342044
89	2023-10-03	1818.5	1818.5	1818.5	1818.5	1818.5	1818.5	1818.5		0	0	0	0	0	0	0	0	0	0	0	0		0	0	0	0	0	0		0	0	0	0	0	0		0	0	0	0	0	0
90	2023-10-02	1824.6	1824.6	1824.6	1824.6	1824.6	1824.6	1824.6		0	0	0	0	0	0	0	0	0	0	0	0		0	0	0	0	0	0		0	0	0	0	0	0		0	0	0	0	0	0
91	2023-10-01	1830	1830.0	1830.0	1830.0	1830.0	1830.0	1830.0		0	0	0	0	0	0	0	0	0	0	0	0		0	0	0	0	0	0		0	0	0	0	0	0		0	0	0	0	0	0
92	2023-09-28	1848.1	1115.325	1862.473	1858.033	1854.494	1852.8	1198.740		-732.775	732.775	14.373	14.373	9.933	9.933	6.394	6.394	4.7	4.7	-649.36	649.36		536959	206.583	98.6645	40.8832	22.09	421668		0.396502	-0.00777718	-0.00537471	-0.00345977	-0.00254315	0.351366		0.396502	0.00777718	0.00537471	0.00345977	0.00254315	0.351366
93	2023-09-27	1860.4	1860.4	1860.4	1860.4	1860.4	1860.4	1860.4		0	0	0	0	0	0	0	0	0	0	0	0		0	0	0	0	0	0		0	0	0	0	0	0		0	0	0	0	0	0
94	2023-09-26	1871.6	1871.6	1871.6	1871.6	1871.6	1871.6	1871.6		0	0	0	0	0	0	0	0	0	0	0	0		0	0	0	0	0	0		0	0	0	0	0	0		0	0	0	0	0	0
95	2023-09-25	1900.4	1900.4	1900.4	1900.4	1900.4	1900.4	1900.4		0	0	0	0	0	0	0	0	0	0	0	0		0	0	0	0	0	0		0	0	0	0	0	0		0	0	0	0	0	0
96	2023-09-24	1916.6	1916.6	1916.6	1916.6	1916.6	1916.6	1916.6		0	0	0	0	0	0	0	0	0	0	0	0		0	0	0	0	0	0		0	0	0	0	0	0		0	0	0	0	0	0
97	2023-09-21	1925.4	1925.4	1925.4	1925.4	1925.4	1925.4	1925.4		0	0	0	0	0	0	0	0	0	0	0	0		0	0	0	0	0	0		0	0	0	0	0	0		0	0	0	0	0	0
98	2023-09-20	1919.2	1919.2	1919.2	1919.2	1919.2	1919.2	1919.2		0	0	0	0	0	0	0	0	0	0	0	0		0	0	0	0	0	0		0	0	0	0	0	0		0	0	0	0	0	0
99	2023-09-19	1945.6	1945.6	1945.6	1945.6	1945.6	1945.6	1945.6		0	0	0	0	0	0	0	0	0	0	0	0		0	0	0	0	0	0		0	0	0	0	0	0		0	0	0	0	0	0
100	2023-09-18	1932	1932.0	1932.0	1932.0	1932.0	1932.0	1932.0		0	0	0	0	0	0	0	0	0	0	0	0		0	0	0	0	0	0		0	0	0	0	0	0		0	0	0	0	0	0
101	2023-09-17	1931.5	1115.325	1933.328	1927.1	1924.351	1929.925	1203.335		-816.175	816.175	1.828	1.828	-4.4	4.4	-7.149	7.149	-1.575	1.575	-728.165	728.165		666142	3.34158	19.36	51.1082	2.48063	530224		0.42256	-0.000946415	0.00227802	0.00370127	0.000815428	0.376995		0.42256	0.000946415	0.00227802	0.00370127	0.000815428	0.376995
102	2023-09-14	1923.7	1923.7	1923.7	1923.7	1923.7	1923.7	1923.7		0	0	0	0	0	0	0	0	0	0	0	0		0	0	0	0	0	0		0	0	0	0	0	0		0	0	0	0	0	0
103	2023-09-13	1910	1910.0	1910.0	1910.0	1910.0	1910.0	1910.0		0	0	0	0	0	0	0	0	0	0	0	0		0	0	0	0	0	0		0	0	0	0	0	0		0	0	0	0	0	0
104	2023-09-12	1909.1	1909.1	1909.1	1909.1	1909.1	1909.1	1909.1		0	0	0	0	0	0	0	0	0	0	0	0		0	0	0	0	0	0		0	0	0	0	0	0		0	0	0	0	0	0
105	2023-09-11	1911.3	1911.3	1911.3	1911.3	1911.3	1911.3	1911.3		0	0	0	0	0	0	0	0	0	0	0	0		0	0	0	0	0	0		0	0	0	0	0	0		0	0	0	0	0	0
106	2023-09-10	1923.3	1923.3	1923.3	1923.3	1923.3	1923.3	1923.3		0	0	0	0	0	0	0	0	0	0	0	0		0	0	0	0	0	0		0	0	0	0	0	0		0	0	0	0	0	0
107	2023-09-07	1918.4	1115.325	1917.409	1919.933	1917.935	1918.950	1203.005		-803.075	803.075	-0.991	0.991	1.533	1.533	-0.465	0.465	0.55	0.55	-715.395	715.395		644929	0.982081	2.35009	0.216225	0.3025	511790		0.418617	0.000516576	-0.000799103	0.000242389	-0.000286697	0.372912		0.418617	0.000516576	0.000799103	0.000242389	0.000286697	0.372912
108	2023-09-06	1917.5	1917.5	1917.5	1917.5	1917.5	1917.5	1917.5		0	0	0	0	0	0	0	0	0	0	0	0		0	0	0	0	0	0		0	0	0	0	0	0		0	0	0	0	0	0
109	2023-09-05	1918.1	1918.1	1918.1	1918.1	1918.1	1918.1	1918.1		0	0	0	0	0	0	0	0	0	0	0	0		0	0	0	0	0	0		0	0	0	0	0	0		0	0	0	0	0	0
110	2023-09-04	1926.2	1926.2	1926.2	1926.2	1926.2	1926.2	1926.2		0	0	0	0	0	0	0	0	0	0	0	0		0	0	0	0	0	0		0	0	0	0	0	0		0	0	0	0	0	0
111	2023-08-31	1939.8	1939.8	1939.8	1939.8	1939.8	1939.8	1939.8		0	0	0	0	0	0	0	0	0	0	0	0		0	0	0	0	0	0		0	0	0	0	0	0		0	0	0	0	0	0
112	2023-08-30	1938.2	1938.2	1938.2	1938.2	1938.2	1938.2	1938.2		0	0	0	0	0	0	0	0	0	0	0	0		0	0	0	0	0	0		0	0	0	0	0	0		0	0	0	0	0	0
113	2023-08-29	1944.3	1944.3	1944.3	1944.3	1944.3	1944.3	1944.3		0	0	0	0	0	0	0	0	0	0	0	0		0	0	0	0	0	0		0	0	0	0	0	0		0	0	0	0	0	0
114	2023-08-28	1936.5	1936.5	1936.5	1936.5	1936.5	1936.5	1936.5		0	0	0	0	0	0	0	0	0	0	0	0		0	0	0	0	0	0		0	0	0	0	0	0		0	0	0	0	0	0
115	2023-08-27	1917.9	1917.9	1917.9	1917.9	1917.9	1917.9	1917.9		0	0	0	0	0	0	0	0	0	0	0	0		0	0	0	0	0	0		0	0	0	0	0	0		0	0	0	0	0	0
116	2023-08-24	1911.1	1911.1	1911.1	1911.1	1911.1	1911.1	1911.1		0	0	0	0	0	0	0	0	0	0	0	0		0	0	0	0	0	0		0	0	0	0	0	0		0	0	0	0	0	0
117	2023-08-23	1918.2	1918.2	1918.2	1918.2	1918.2	1918.2	1918.2		0	0	0	0	0	0	0	0	0	0	0	0		0	0	0	0	0	0		0	0	0	0	0	0		0	0	0	0	0	0
118	2023-08-22	1918.5	1918.5	1918.5	1918.5	1918.5	1918.5	1918.5		0	0	0	0	0	0	0	0	0	0	0	0		0	0	0	0	0	0		0	0	0	0	0	0		0	0	0	0	0	0
119	2023-08-21	1896.4	1896.4	1896.4	1896.4	1896.4	1896.4	1896.4		0	0	0	0	0	0	0	0	0	0	0	0		0	0	0	0	0	0		0	0	0	0	0	0		0	0	0	0	0	0
120	2023-08-20	1893.3	1893.3	1893.3	1893.3	1893.3	1893.3	1893.3		0	0	0	0	0	0	0	0	0	0	0	0		0	0	0	0	0	0		0	0	0	0	0	0		0	0	0	0	0	0
121	2023-08-17	1886.1	1886.1	1886.1	1886.1	1886.1	1886.1	1886.1		0	0	0	0	0	0	0	0	0	0	0	0		0	0	0	0	0	0		0	0	0	0	0	0		0	0	0	0	0	0
122	2023-08-16	1884.1	1884.1	1884.1	1884.1	1884.1	1884.1	1884.1		0	0	0	0	0	0	0	0	0	0	0	0		0	0	0	0	0	0		0	0	0	0	0	0		0	0	0	0	0	0
123	2023-08-15	1896.1	1896.1	1896.1	1896.1	1896.1	1896.1	1896.1		0	0	0	0	0	0	0	0	0	0	0	0		0	0	0	0	0	0		0	0	0	0	0	0		0	0	0	0	0	0
124	2023-08-14	1902.5	1115.325	1903.056	1906.067	1904.375	1903.350	1201.860		-787.175	787.175	0.556	0.556	3.567	3.567	1.875	1.875	0.85	0.85	-700.64	700.64		619644	0.309136	12.7235	3.51562	0.7225	490896		0.413758	-0.000292247	-0.0018749	-0.000985545	-0.000446781	0.368273		0.413758	0.000292247	0.0018749	0.000985545	0.000446781	0.368273
125	2023-08-13	1910.6	1910.6	1910.6	1910.6	1910.6	1910.6	1910.6		0	0	0	0	0	0	0	0	0	0	0	0		0	0	0	0	0	0		0	0	0	0	0	0		0	0	0	0	0	0
126	2023-08-10	1912.9	1912.9	1912.9	1912.9	1912.9	1912.9	1912.9		0	0	0	0	0	0	0	0	0	0	0	0		0	0	0	0	0	0		0	0	0	0	0	0		0	0	0	0	0	0
127	2023-08-09	1914.4	1115.325	1918.386	1918.3	1921.054	1916.633	1202.887		-799.075	799.075	3.986	3.986	3.9	3.9	6.654	6.654	2.233	2.233	-711.513	711.513		638521	15.8882	15.21	44.2757	4.98629	506251		0.417402	-0.00208211	-0.00203719	-0.00347576	-0.00116642	0.371664		0.417402	0.00208211	0.00203719	0.00347576	0.00116642	0.371664
128	2023-08-08	1915.4	1115.325	1922.175	1921.3	1923.360	1920.367	1203.024		-800.075	800.075	6.775	6.775	5.9	5.9	7.96	7.96	4.967	4.967	-712.376	712.376		640120	45.9006	34.81	63.3616	24.6711	507480		0.417706	-0.00353712	-0.0030803	-0.00415579	-0.00259319	0.37192		0.417706	0.00353712	0.0030803	0.00415579	0.00259319	0.37192
129	2023-08-07	1924.1	1924.1	1924.1	1924.1	1924.1	1924.1	1924.1		0	0	0	0	0	0	0	0	0	0	0	0		0	0	0	0	0	0		0	0	0	0	0	0		0	0	0	0	0	0
130	2023-08-06	1933.5	1933.5	1933.5	1933.5	1933.5	1933.5	1933.5		0	0	0	0	0	0	0	0	0	0	0	0		0	0	0	0	0	0		0	0	0	0	0	0		0	0	0	0	0	0
131	2023-08-03	1939.6	1939.6	1939.6	1939.6	1939.6	1939.6	1939.6		0	0	0	0	0	0	0	0	0	0	0	0		0	0	0	0	0	0		0	0	0	0	0	0		0	0	0	0	0	0
132	2023-08-02	1932	1115.325	1933.328	1929.733	1932.649	1938.5	1203.546		-816.675	816.675	1.328	1.328	-2.267	2.267	0.649	0.649	6.5	6.5	-728.454	728.454		666958	1.76358	5.13929	0.421201	42.25	530645		0.42271	-0.000687371	0.0011734	-0.000335921	-0.00336439	0.377047		0.42271	0.000687371	0.0011734	0.000335921	0.00336439	0.377047
133	2023-08-01	1937.4	1937.4	1937.4	1937.4	1937.4	1937.4	1937.4		0	0	0	0	0	0	0	0	0	0	0	0		0	0	0	0	0	0		0	0	0	0	0	0		0	0	0	0	0	0
134	2023-07-31	1940.7	1940.7	1940.7	1940.7	1940.7	1940.7	1940.7		0	0	0	0	0	0	0	0	0	0	0	0		0	0	0	0	0	0		0	0	0	0	0	0		0	0	0	0	0	0
135	2023-07-30	1970.5	1970.5	1970.5	1970.5	1970.5	1970.5	1970.5		0	0	0	0	0	0	0	0	0	0	0	0		0	0	0	0	0	0		0	0	0	0	0	0		0	0	0	0	0	0
136	2023-07-27	1960.4	1960.4	1960.4	1960.4	1960.4	1960.4	1960.4		0	0	0	0	0	0	0	0	0	0	0	0		0	0	0	0	0	0		0	0	0	0	0	0		0	0	0	0	0	0
137	2023-07-26	1945.4	1945.4	1945.4	1945.4	1945.4	1945.4	1945.4		0	0	0	0	0	0	0	0	0	0	0	0		0	0	0	0	0	0		0	0	0	0	0	0		0	0	0	0	0	0
138	2023-07-25	1968.9	1968.9	1968.9	1968.9	1968.9	1968.9	1968.9		0	0	0	0	0	0	0	0	0	0	0	0		0	0	0	0	0	0		0	0	0	0	0	0		0	0	0	0	0	0
139	2023-07-24	1962.1	1962.1	1962.1	1962.1	1962.1	1962.1	1962.1		0	0	0	0	0	0	0	0	0	0	0	0		0	0	0	0	0	0		0	0	0	0	0	0		0	0	0	0	0	0
140	2023-07-23	1960.3	1960.3	1960.3	1960.3	1960.3	1960.3	1960.3		0	0	0	0	0	0	0	0	0	0	0	0		0	0	0	0	0	0		0	0	0	0	0	0		0	0	0	0	0	0
141	2023-07-20	1964.3	1964.3	1964.3	1964.3	1964.3	1964.3	1964.3		0	0	0	0	0	0	0	0	0	0	0	0		0	0	0	0	0	0		0	0	0	0	0	0		0	0	0	0	0	0
142	2023-07-19	1968.3	1968.3	1968.3	1968.3	1968.3	1968.3	1968.3		0	0	0	0	0	0	0	0	0	0	0	0		0	0	0	0	0	0		0	0	0	0	0	0		0	0	0	0	0	0
143	2023-07-18	1977.5	1977.5	1977.5	1977.5	1977.5	1977.5	1977.5		0	0	0	0	0	0	0	0	0	0	0	0		0	0	0	0	0	0		0	0	0	0	0	0		0	0	0	0	0	0
144	2023-07-17	1977.2	1977.2	1977.2	1977.2	1977.2	1977.2	1977.2		0	0	0	0	0	0	0	0	0	0	0	0		0	0	0	0	0	0		0	0	0	0	0	0		0	0	0	0	0	0
145	2023-07-16	1952.4	1952.4	1952.4	1952.4	1952.4	1952.4	1952.4		0	0	0	0	0	0	0	0	0	0	0	0		0	0	0	0	0	0		0	0	0	0	0	0		0	0	0	0	0	0
146	2023-07-13	1960.1	1115.325	1959.245	1955.633	1957.137	1957.5	1204.560		-844.775	844.775	-0.855	0.855	-4.467	4.467	-2.963	2.963	-2.6	2.6	-755.54	755.54		713645	0.731025	19.9541	8.77937	6.76	570841		0.430986	0.000436202	0.00227897	0.00151166	0.00132646	0.38546		0.430986	0.000436202	0.00227897	0.00151166	0.00132646	0.38546
147	2023-07-12	1959.2	1959.2	1959.2	1959.2	1959.2	1959.2	1959.2		0	0	0	0	0	0	0	0	0	0	0	0		0	0	0	0	0	0		0	0	0	0	0	0		0	0	0	0	0	0
148	2023-07-11	1956.2	1956.2	1956.2	1956.2	1956.2	1956.2	1956.2		0	0	0	0	0	0	0	0	0	0	0	0		0	0	0	0	0	0		0	0	0	0	0	0		0	0	0	0	0	0
149	2023-07-10	1931.3	1931.3	1931.3	1931.3	1931.3	1931.3	1931.3		0	0	0	0	0	0	0	0	0	0	0	0		0	0	0	0	0	0		0	0	0	0	0	0		0	0	0	0	0	0
150	2023-07-09	1925	1925.0	1925.0	1925.0	1925.0	1925.0	1925.0		0	0	0	0	0	0	0	0	0	0	0	0		0	0	0	0	0	0		0	0	0	0	0	0		0	0	0	0	0	0
151	2023-07-06	1926.2	1926.2	1926.2	1926.2	1926.2	1926.2	1926.2		0	0	0	0	0	0	0	0	0	0	0	0		0	0	0	0	0	0		0	0	0	0	0	0		0	0	0	0	0	0
152	2023-07-05	1908.7	1908.7	1908.7	1908.7	1908.7	1908.7	1908.7		0	0	0	0	0	0	0	0	0	0	0	0		0	0	0	0	0	0		0	0	0	0	0	0		0	0	0	0	0	0
153	2023-07-04	1919.6	1919.6	1919.6	1919.6	1919.6	1919.6	1919.6		0	0	0	0	0	0	0	0	0	0	0	0		0	0	0	0	0	0		0	0	0	0	0	0		0	0	0	0	0	0
154	2023-07-03	1921.7	1921.7	1921.7	1921.7	1921.7	1921.7	1921.7		0	0	0	0	0	0	0	0	0	0	0	0		0	0	0	0	0	0		0	0	0	0	0	0		0	0	0	0	0	0
155	2023-06-29	1921.1	1921.1	1921.1	1921.1	1921.1	1921.1	1921.1		0	0	0	0	0	0	0	0	0	0	0	0		0	0	0	0	0	0		0	0	0	0	0	0		0	0	0	0	0	0
156	2023-06-28	1909.2	1115.325	1901.343	1903.7	1904.001	1916.7	1201.934		-793.875	793.875	-7.857	7.857	-5.5	5.5	-5.199	5.199	7.5	7.5	-707.266	707.266		630238	61.7324	30.25	27.0296	56.25	500225		0.415816	0.00411534	0.00288079	0.00272313	-0.00392835	0.370451		0.415816	0.00411534	0.00288079	0.00272313	0.00392835	0.370451
157	2023-06-27	1912.3	1912.3	1912.3	1912.3	1912.3	1912.3	1912.3		0	0	0	0	0	0	0	0	0	0	0	0		0	0	0	0	0	0		0	0	0	0	0	0		0	0	0	0	0	0
158	2023-06-26	1914	1115.325	1922.175	1921.3	1920.410	1918.0	1203.068		-798.675	798.675	8.175	8.175	7.3	7.3	6.41	6.41	4	4	-710.932	710.932		637882	66.8306	53.29	41.0881	16	505424		0.417281	-0.00427116	-0.003814	-0.00334901	-0.00208986	0.371438		0.417281	0.00427116	0.003814	0.00334901	0.00208986	0.371438
159	2023-06-25	1923.7	1923.7	1923.7	1923.7	1923.7	1923.7	1923.7		0	0	0	0	0	0	0	0	0	0	0	0		0	0	0	0	0	0		0	0	0	0	0	0		0	0	0	0	0	0
160	2023-06-22	1919.1	1919.1	1919.1	1919.1	1919.1	1919.1	1919.1		0	0	0	0	0	0	0	0	0	0	0	0		0	0	0	0	0	0		0	0	0	0	0	0		0	0	0	0	0	0
161	2023-06-21	1912.7	1115.325	1917.409	1910.133	1914.995	1924.714	1202.750		-797.375	797.375	4.709	4.709	-2.567	2.567	2.295	2.295	12.014	12.014	-709.95	709.95		635807	22.1747	6.58949	5.26702	144.336	504029		0.416885	-0.00246196	0.00134208	-0.00119987	-0.00628117	0.371177		0.416885	0.00246196	0.00134208	0.00119987	0.00628117	0.371177
162	2023-06-20	1933.3	1115.325	1930.700	1925.967	1928.470	1930.329	1203.443		-817.975	817.975	-2.6	2.6	-7.333	7.333	-4.83	4.83	-2.971	2.971	-729.857	729.857		669083	6.76	53.7729	23.3289	8.82684	532691		0.423098	0.00134485	0.003793	0.00249832	0.00153675	0.377519		0.423098	0.00134485	0.003793	0.00249832	0.00153675	0.377519
163	2023-06-19	1935.5	1115.325	1947.569	1937.433	1936.306	1935.943	1204.260		-820.175	820.175	12.069	12.069	1.933	1.933	0.806	0.806	0.443	0.443	-731.24	731.24		672687	145.661	3.73649	0.649636	0.196249	534712		0.423754	-0.0062356	-0.000998708	-0.00041643	-0.000228881	0.377804		0.423754	0.0062356	0.000998708	0.00041643	0.000228881	0.377804
164	2023-06-15	1958.4	1958.4	1958.4	1958.4	1958.4	1958.4	1958.4		0	0	0	0	0	0	0	0	0	0	0	0		0	0	0	0	0	0		0	0	0	0	0	0		0	0	0	0	0	0
165	2023-06-14	1957.8	1957.8	1957.8	1957.8	1957.8	1957.8	1957.8		0	0	0	0	0	0	0	0	0	0	0	0		0	0	0	0	0	0		0	0	0	0	0	0		0	0	0	0	0	0
166	2023-06-13	1955.3	1115.325	1947.569	1954.6	1947.998	1956.967	1204.227		-839.975	839.975	-7.731	7.731	-0.7	0.7	-7.302	7.302	1.667	1.667	-751.073	751.073		705558	59.7684	0.49	53.3192	2.77889	564111		0.429589	0.00395387	0.000358001	0.00373447	-0.000852555	0.384122		0.429589	0.00395387	0.000358001	0.00373447	0.000852555	0.384122
167	2023-06-12	1944.6	1115.325	1947.569	1939.267	1943.206	1956.133	1204.518		-829.275	829.275	2.969	2.969	-5.333	5.333	-1.394	1.394	11.533	11.533	-740.082	740.082		687697	8.81496	28.4409	1.94324	133.01	547721		0.42645	-0.00152679	0.00274247	0.000716857	-0.00593078	0.380583		0.42645	0.00152679	0.00274247	0.000716857	0.00593078	0.380583
168	2023-06-11	1955.3	1955.3	1955.3	1955.3	1955.3	1955.3	1955.3		0	0	0	0	0	0	0	0	0	0	0	0		0	0	0	0	0	0		0	0	0	0	0	0		0	0	0	0	0	0
169	2023-06-08	1962.2	1962.2	1962.2	1962.2	1962.2	1962.2	1962.2		0	0	0	0	0	0	0	0	0	0	0	0		0	0	0	0	0	0		0	0	0	0	0	0		0	0	0	0	0	0
170	2023-06-07	1963.6	1963.6	1963.6	1963.6	1963.6	1963.6	1963.6		0	0	0	0	0	0	0	0	0	0	0	0		0	0	0	0	0	0		0	0	0	0	0	0		0	0	0	0	0	0
171	2023-06-06	1942.7	1942.7	1942.7	1942.7	1942.7	1942.7	1942.7		0	0	0	0	0	0	0	0	0	0	0	0		0	0	0	0	0	0		0	0	0	0	0	0		0	0	0	0	0	0
172	2023-06-05	1965.5	1965.5	1965.5	1965.5	1965.5	1965.5	1965.5		0	0	0	0	0	0	0	0	0	0	0	0		0	0	0	0	0	0		0	0	0	0	0	0		0	0	0	0	0	0
173	2023-06-04	1958	1115.325	1947.569	1952.967	1945.044	1962.225	1204.258		-842.675	842.675	-10.431	10.431	-5.033	5.033	-12.956	12.956	4.225	4.225	-753.742	753.742		710101	108.806	25.3311	167.858	17.8506	568127		0.430375	0.00532737	0.00257048	0.00661696	-0.00215781	0.384955		0.430375	0.00532737	0.00257048	0.00661696	0.00215781	0.384955
174	2023-06-01	1952.4	1952.4	1952.4	1952.4	1952.4	1952.4	1952.4		0	0	0	0	0	0	0	0	0	0	0	0		0	0	0	0	0	0		0	0	0	0	0	0		0	0	0	0	0	0
175	2023-05-31	1978	1978.0	1978.0	1978.0	1978.0	1978.0	1978.0		0	0	0	0	0	0	0	0	0	0	0	0		0	0	0	0	0	0		0	0	0	0	0	0		0	0	0	0	0	0
176	2023-05-30	1963.9	1963.9	1963.9	1963.9	1963.9	1963.9	1963.9		0	0	0	0	0	0	0	0	0	0	0	0		0	0	0	0	0	0		0	0	0	0	0	0		0	0	0	0	0	0
177	2023-05-29	1958	1115.325	1947.569	1954.467	1944.698	1959.940	1204.103		-842.675	842.675	-10.431	10.431	-3.533	3.533	-13.302	13.302	1.94	1.94	-753.897	753.897		710101	108.806	12.4821	176.943	3.7636	568361		0.430375	0.00532737	0.00180439	0.00679367	-0.000990807	0.385034		0.430375	0.00532737	0.00180439	0.00679367	0.000990807	0.385034
178	2023-05-25	1944.1	1944.1	1944.1	1944.1	1944.1	1944.1	1944.1		0	0	0	0	0	0	0	0	0	0	0	0		0	0	0	0	0	0		0	0	0	0	0	0		0	0	0	0	0	0
179	2023-05-24	1943.1	1115.325	1951.011	1943.833	1944.241	1953.533	1204.001		-827.775	827.775	7.911	7.911	0.733	0.733	1.141	1.141	10.433	10.433	-739.099	739.099		685211	62.5839	0.537289	1.30188	108.847	546267		0.426007	-0.00407133	-0.000377232	-0.000587206	-0.00536926	0.380371		0.426007	0.00407133	0.000377232	0.000587206	0.00536926	0.380371
180	2023-05-23	1962.8	1115.325	1971.660	1972.133	1971.608	1962.967	1204.995		-847.475	847.475	8.86	8.86	9.333	9.333	8.808	8.808	0.167	0.167	-757.805	757.805		718214	78.4996	87.1049	77.5809	0.027889	574268		0.431768	-0.00451396	-0.00475494	-0.00448747	-8.50825e-05	0.386084		0.431768	0.00451396	0.00475494	0.00448747	8.50825e-05	0.386084
181	2023-05-22	1972.4	1972.4	1972.4	1972.4	1972.4	1972.4	1972.4		0	0	0	0	0	0	0	0	0	0	0	0		0	0	0	0	0	0		0	0	0	0	0	0		0	0	0	0	0	0
182	2023-05-21	1974.8	1974.8	1974.8	1974.8	1974.8	1974.8	1974.8		0	0	0	0	0	0	0	0	0	0	0	0		0	0	0	0	0	0		0	0	0	0	0	0		0	0	0	0	0	0
183	2023-05-18	1978.7	1978.7	1978.7	1978.7	1978.7	1978.7	1978.7		0	0	0	0	0	0	0	0	0	0	0	0		0	0	0	0	0	0		0	0	0	0	0	0		0	0	0	0	0	0
184	2023-05-17	1956.5	1115.325	1951.011	1953.233	1953.718	1979.7	1204.528		-841.175	841.175	-5.489	5.489	-3.267	3.267	-2.782	2.782	23.2	23.2	-751.972	751.972		707575	30.1291	10.6733	7.73952	538.24	565462		0.429939	0.00280552	0.00166982	0.00142193	-0.0118579	0.384346		0.429939	0.00280552	0.00166982	0.00142193	0.0118579	0.384346
185	2023-05-16	1980.7	1980.7	1980.7	1980.7	1980.7	1980.7	1980.7		0	0	0	0	0	0	0	0	0	0	0	0		0	0	0	0	0	0		0	0	0	0	0	0		0	0	0	0	0	0
186	2023-05-15	1988.4	1988.4	1988.4	1988.4	1988.4	1988.4	1988.4		0	0	0	0	0	0	0	0	0	0	0	0		0	0	0	0	0	0		0	0	0	0	0	0		0	0	0	0	0	0
187	2023-05-14	2018	2018.0	2018.0	2018.0	2018.0	2018.0	2018.0		0	0	0	0	0	0	0	0	0	0	0	0		0	0	0	0	0	0		0	0	0	0	0	0		0	0	0	0	0	0
188	2023-05-11	2014.5	2014.5	2014.5	2014.5	2014.5	2014.5	2014.5		0	0	0	0	0	0	0	0	0	0	0	0		0	0	0	0	0	0		0	0	0	0	0	0		0	0	0	0	0	0
189	2023-05-10	2014.7	2014.7	2014.7	2014.7	2014.7	2014.7	2014.7		0	0	0	0	0	0	0	0	0	0	0	0		0	0	0	0	0	0		0	0	0	0	0	0		0	0	0	0	0	0
190	2023-05-09	2030.5	2030.5	2030.5	2030.5	2030.5	2030.5	2030.5		0	0	0	0	0	0	0	0	0	0	0	0		0	0	0	0	0	0		0	0	0	0	0	0		0	0	0	0	0	0
191	2023-05-08	2036.2	2036.2	2036.2	2036.2	2036.2	2036.2	2036.2		0	0	0	0	0	0	0	0	0	0	0	0		0	0	0	0	0	0		0	0	0	0	0	0		0	0	0	0	0	0
192	2023-05-07	2026.3	2026.3	2026.3	2026.3	2026.3	2026.3	2026.3		0	0	0	0	0	0	0	0	0	0	0	0		0	0	0	0	0	0		0	0	0	0	0	0		0	0	0	0	0	0
193	2023-05-04	2017.4	2017.4	2017.4	2017.4	2017.4	2017.4	2017.4		0	0	0	0	0	0	0	0	0	0	0	0		0	0	0	0	0	0		0	0	0	0	0	0		0	0	0	0	0	0
194	2023-05-03	2048	2048.0	2048.0	2048.0	2048.0	2048.0	2048.0		0	0	0	0	0	0	0	0	0	0	0	0		0	0	0	0	0	0		0	0	0	0	0	0		0	0	0	0	0	0
195	2023-05-02	2028.6	2028.6	2028.6	2028.6	2028.6	2028.6	2028.6		0	0	0	0	0	0	0	0	0	0	0	0		0	0	0	0	0	0		0	0	0	0	0	0		0	0	0	0	0	0
196	2023-05-01	2014.3	1115.325	2001.629	2003.833	2004.561	2020.9	1205.560		-898.975	898.975	-12.671	12.671	-10.467	10.467	-9.739	9.739	6.6	6.6	-808.74	808.74		808156	160.554	109.558	94.8481	43.56	654060		0.446296	0.00629052	0.00519635	0.00483493	-0.00327657	0.401499		0.446296	0.00629052	0.00519635	0.00483493	0.00327657	0.401499
197	2023-04-30	1983.4	1115.325	1993.330	1984.0	1987.520	2013.2	1205.352		-868.075	868.075	9.93	9.93	0.6	0.6	4.12	4.12	29.8	29.8	-778.048	778.048		753554	98.6049	0.36	16.9744	888.04	605359		0.43767	-0.00500655	-0.000302511	-0.00207724	-0.0150247	0.39228		0.43767	0.00500655	0.000302511	0.00207724	0.0150247	0.39228
198	2023-04-27	1990.1	1990.1	1990.1	1990.1	1990.1	1990.1	1990.1		0	0	0	0	0	0	0	0	0	0	0	0		0	0	0	0	0	0		0	0	0	0	0	0		0	0	0	0	0	0
199	2023-04-26	1989.9	1989.9	1989.9	1989.9	1989.9	1989.9	1989.9		0	0	0	0	0	0	0	0	0	0	0	0		0	0	0	0	0	0		0	0	0	0	0	0		0	0	0	0	0	0
200	2023-04-25	1985.7	1985.7	1985.7	1985.7	1985.7	1985.7	1985.7		0	0	0	0	0	0	0	0	0	0	0	0		0	0	0	0	0	0		0	0	0	0	0	0		0	0	0	0	0	0
201	2023-04-24	1994	1115.325	1988.689	1984.333	1984.735	1987.4	1205.444		-878.675	878.675	-5.311	5.311	-9.667	9.667	-9.265	9.265	-6.6	6.6	-788.556	788.556		772070	28.2067	93.4509	85.8402	43.56	621821		0.440659	0.00266349	0.00484804	0.00464644	0.00330993	0.395464		0.440659	0.00266349	0.00484804	0.00464644	0.00330993	0.395464
202	2023-04-23	1989.1	1989.1	1989.1	1989.1	1989.1	1989.1	1989.1		0	0	0	0	0	0	0	0	0	0	0	0		0	0	0	0	0	0		0	0	0	0	0	0		0	0	0	0	0	0
203	2023-04-20	1979.5	1979.5	1979.5	1979.5	1979.5	1979.5	1979.5		0	0	0	0	0	0	0	0	0	0	0	0		0	0	0	0	0	0		0	0	0	0	0	0		0	0	0	0	0	0
204	2023-04-19	2007.6	1115.325	2016.923	2002.8	2005.189	1987.350	1205.552		-892.275	892.275	9.323	9.323	-4.8	4.8	-2.411	2.411	-20.25	20.25	-802.048	802.048		796155	86.9183	23.04	5.81292	410.062	643281		0.444449	-0.00464385	0.00239091	0.00120094	0.0100867	0.399506		0.444449	0.00464385	0.00239091	0.00120094	0.0100867	0.399506
205	2023-04-18	1995.2	1995.2	1995.2	1995.2	1995.2	1995.2	1995.2		0	0	0	0	0	0	0	0	0	0	0	0		0	0	0	0	0	0		0	0	0	0	0	0		0	0	0	0	0	0
206	2023-04-17	2007.4	2007.4	2007.4	2007.4	2007.4	2007.4	2007.4		0	0	0	0	0	0	0	0	0	0	0	0		0	0	0	0	0	0		0	0	0	0	0	0		0	0	0	0	0	0
207	2023-04-16	1994.2	1994.2	1994.2	1994.2	1994.2	1994.2	1994.2		0	0	0	0	0	0	0	0	0	0	0	0		0	0	0	0	0	0		0	0	0	0	0	0		0	0	0	0	0	0
208	2023-04-13	2002.2	2002.2	2002.2	2002.2	2002.2	2002.2	2002.2		0	0	0	0	0	0	0	0	0	0	0	0		0	0	0	0	0	0		0	0	0	0	0	0		0	0	0	0	0	0
209	2023-04-12	2041.3	2041.3	2041.3	2041.3	2041.3	2041.3	2041.3		0	0	0	0	0	0	0	0	0	0	0	0		0	0	0	0	0	0		0	0	0	0	0	0		0	0	0	0	0	0
210	2023-04-11	2010.9	1115.325	2016.923	2016.133	2011.658	2023.050	1205.624		-895.575	895.575	6.023	6.023	5.233	5.233	0.758	0.758	12.15	12.15	-805.276	805.276		802055	36.2765	27.3843	0.574564	147.622	648469		0.44536	-0.00299518	-0.00260232	-0.000376946	-0.00604207	0.400456		0.44536	0.00299518	0.00260232	0.000376946	0.00604207	0.400456
211	2023-04-10	2004.8	2004.8	2004.8	2004.8	2004.8	2004.8	2004.8		0	0	0	0	0	0	0	0	0	0	0	0		0	0	0	0	0	0		0	0	0	0	0	0		0	0	0	0	0	0
212	2023-04-09	1989.1	1989.1	1989.1	1989.1	1989.1	1989.1	1989.1		0	0	0	0	0	0	0	0	0	0	0	0		0	0	0	0	0	0		0	0	0	0	0	0		0	0	0	0	0	0
213	2023-04-05	2011.9	2011.9	2011.9	2011.9	2011.9	2011.9	2011.9		0	0	0	0	0	0	0	0	0	0	0	0		0	0	0	0	0	0		0	0	0	0	0	0		0	0	0	0	0	0
214	2023-04-04	2020.9	1115.325	2033.075	2024.333	2019.676	2017.050	1205.635		-905.575	905.575	12.175	12.175	3.433	3.433	-1.224	1.224	-3.85	3.85	-815.265	815.265		820066	148.231	11.7855	1.49818	14.8225	664657		0.448105	-0.00602454	-0.00169875	0.000605671	0.00190509	0.403417		0.448105	0.00602454	0.00169875	0.000605671	0.00190509	0.403417
215	2023-04-03	2022.2	2022.2	2022.2	2022.2	2022.2	2022.2	2022.2		0	0	0	0	0	0	0	0	0	0	0	0		0	0	0	0	0	0		0	0	0	0	0	0		0	0	0	0	0	0
216	2023-04-02	1983.9	1983.9	1983.9	1983.9	1983.9	1983.9	1983.9		0	0	0	0	0	0	0	0	0	0	0	0		0	0	0	0	0	0		0	0	0	0	0	0		0	0	0	0	0	0
217	2023-03-30	1969	1969.0	1969.0	1969.0	1969.0	1969.0	1969.0		0	0	0	0	0	0	0	0	0	0	0	0		0	0	0	0	0	0		0	0	0	0	0	0		0	0	0	0	0	0
218	2023-03-29	1980.3	1980.3	1980.3	1980.3	1980.3	1980.3	1980.3		0	0	0	0	0	0	0	0	0	0	0	0		0	0	0	0	0	0		0	0	0	0	0	0		0	0	0	0	0	0
219	2023-03-28	1966.1	1115.325	1976.307	1963.4	1965.636	1976.350	1204.838		-850.775	850.775	10.207	10.207	-2.7	2.7	-0.464	0.464	10.25	10.25	-761.262	761.262		723818	104.183	7.29	0.215296	105.062	579520		0.432722	-0.0051915	0.00137328	0.000236	-0.00521337	0.387194		0.432722	0.0051915	0.00137328	0.000236	0.00521337	0.387194
220	2023-03-27	1972.4	1972.4	1972.4	1972.4	1972.4	1972.4	1972.4		0	0	0	0	0	0	0	0	0	0	0	0		0	0	0	0	0	0		0	0	0	0	0	0		0	0	0	0	0	0
221	2023-03-26	1952.4	1952.4	1952.4	1952.4	1952.4	1952.4	1952.4		0	0	0	0	0	0	0	0	0	0	0	0		0	0	0	0	0	0		0	0	0	0	0	0		0	0	0	0	0	0
222	2023-03-23	1982.1	1982.1	1982.1	1982.1	1982.1	1982.1	1982.1		0	0	0	0	0	0	0	0	0	0	0	0		0	0	0	0	0	0		0	0	0	0	0	0		0	0	0	0	0	0
223	2023-03-22	1993.8	1993.8	1993.8	1993.8	1993.8	1993.8	1993.8		0	0	0	0	0	0	0	0	0	0	0	0		0	0	0	0	0	0		0	0	0	0	0	0		0	0	0	0	0	0
224	2023-03-21	1946.8	1946.8	1946.8	1946.8	1946.8	1946.8	1946.8		0	0	0	0	0	0	0	0	0	0	0	0		0	0	0	0	0	0		0	0	0	0	0	0		0	0	0	0	0	0
225	2023-03-20	1938	1938.0	1938.0	1938.0	1938.0	1938.0	1938.0		0	0	0	0	0	0	0	0	0	0	0	0		0	0	0	0	0	0		0	0	0	0	0	0		0	0	0	0	0	0
226	2023-03-19	1979.2	1979.2	1979.2	1979.2	1979.2	1979.2	1979.2		0	0	0	0	0	0	0	0	0	0	0	0		0	0	0	0	0	0		0	0	0	0	0	0		0	0	0	0	0	0
227	2023-03-16	1969.8	1969.8	1969.8	1969.8	1969.8	1969.8	1969.8		0	0	0	0	0	0	0	0	0	0	0	0		0	0	0	0	0	0		0	0	0	0	0	0		0	0	0	0	0	0
228	2023-03-15	1919	1919.0	1919.0	1919.0	1919.0	1919.0	1919.0		0	0	0	0	0	0	0	0	0	0	0	0		0	0	0	0	0	0		0	0	0	0	0	0		0	0	0	0	0	0
229	2023-03-14	1926.6	1926.6	1926.6	1926.6	1926.6	1926.6	1926.6		0	0	0	0	0	0	0	0	0	0	0	0		0	0	0	0	0	0		0	0	0	0	0	0		0	0	0	0	0	0
230	2023-03-13	1906.2	1906.2	1906.2	1906.2	1906.2	1906.2	1906.2		0	0	0	0	0	0	0	0	0	0	0	0		0	0	0	0	0	0		0	0	0	0	0	0		0	0	0	0	0	0
231	2023-03-12	1911.7	1911.7	1911.7	1911.7	1911.7	1911.7	1911.7		0	0	0	0	0	0	0	0	0	0	0	0		0	0	0	0	0	0		0	0	0	0	0	0		0	0	0	0	0	0
232	2023-03-10	1862	1115.325	1862.473	1865.533	1867.292	1856.767	1198.468		-746.675	746.675	0.473	0.473	3.533	3.533	5.292	5.292	-5.233	5.233	-663.532	663.532		557524	0.223729	12.4821	28.0053	27.3843	440275		0.401007	-0.000254028	-0.00189742	-0.00284211	0.00281042	0.356354		0.401007	0.000254028	0.00189742	0.00284211	0.00281042	0.356354
233	2023-03-09	1829.3	1829.3	1829.3	1829.3	1829.3	1829.3	1829.3		0	0	0	0	0	0	0	0	0	0	0	0		0	0	0	0	0	0		0	0	0	0	0	0		0	0	0	0	0	0
234	2023-03-08	1812.7	1812.7	1812.7	1812.7	1812.7	1812.7	1812.7		0	0	0	0	0	0	0	0	0	0	0	0		0	0	0	0	0	0		0	0	0	0	0	0		0	0	0	0	0	0
235	2023-03-07	1813.9	1813.9	1813.9	1813.9	1813.9	1813.9	1813.9		0	0	0	0	0	0	0	0	0	0	0	0		0	0	0	0	0	0		0	0	0	0	0	0		0	0	0	0	0	0
236	2023-03-06	1847.9	1115.325	1854.756	1847.033	1850.180	1822.350	1197.846		-732.575	732.575	6.856	6.856	-0.867	0.867	2.28	2.28	-25.55	25.55	-650.054	650.054		536666	47.0047	0.751689	5.1984	652.803	422570		0.396436	-0.00371016	0.000469181	-0.00123383	0.0138265	0.35178		0.396436	0.00371016	0.000469181	0.00123383	0.0138265	0.35178
237	2023-03-03	1847.7	1847.7	1847.7	1847.7	1847.7	1847.7	1847.7		0	0	0	0	0	0	0	0	0	0	0	0		0	0	0	0	0	0		0	0	0	0	0	0		0	0	0	0	0	0
238	2023-03-02	1833.5	1115.325	1832.470	1834.3	1836.023	1842.7	1196.156		-718.175	718.175	-1.03	1.03	0.8	0.8	2.523	2.523	9.2	9.2	-637.344	637.344		515775	1.0609	0.64	6.36553	84.64	406207		0.391696	0.000561767	-0.000436324	-0.00137606	-0.00501773	0.347611		0.391696	0.000561767	0.000436324	0.00137606	0.00501773	0.347611
239	2023-03-01	1837.7	1837.7	1837.7	1837.7	1837.7	1837.7	1837.7		0	0	0	0	0	0	0	0	0	0	0	0		0	0	0	0	0	0		0	0	0	0	0	0		0	0	0	0	0	0
240	2023-02-28	1828.9	1828.9	1828.9	1828.9	1828.9	1828.9	1828.9		0	0	0	0	0	0	0	0	0	0	0	0		0	0	0	0	0	0		0	0	0	0	0	0		0	0	0	0	0	0
241	2023-02-27	1817	1817.0	1817.0	1817.0	1817.0	1817.0	1817.0		0	0	0	0	0	0	0	0	0	0	0	0		0	0	0	0	0	0		0	0	0	0	0	0		0	0	0	0	0	0
242	2023-02-24	1808.8	1808.8	1808.8	1808.8	1808.8	1808.8	1808.8		0	0	0	0	0	0	0	0	0	0	0	0		0	0	0	0	0	0		0	0	0	0	0	0		0	0	0	0	0	0
243	2023-02-23	1818	1818.0	1818.0	1818.0	1818.0	1818.0	1818.0		0	0	0	0	0	0	0	0	0	0	0	0		0	0	0	0	0	0		0	0	0	0	0	0		0	0	0	0	0	0
244	2023-02-22	1832	1832.0	1832.0	1832.0	1832.0	1832.0	1832.0		0	0	0	0	0	0	0	0	0	0	0	0		0	0	0	0	0	0		0	0	0	0	0	0		0	0	0	0	0	0
245	2023-02-21	1833	1833.0	1833.0	1833.0	1833.0	1833.0	1833.0		0	0	0	0	0	0	0	0	0	0	0	0		0	0	0	0	0	0		0	0	0	0	0	0		0	0	0	0	0	0
246	2023-02-17	1840.4	1840.4	1840.4	1840.4	1840.4	1840.4	1840.4		0	0	0	0	0	0	0	0	0	0	0	0		0	0	0	0	0	0		0	0	0	0	0	0		0	0	0	0	0	0
247	2023-02-16	1842	1842.0	1842.0	1842.0	1842.0	1842.0	1842.0		0	0	0	0	0	0	0	0	0	0	0	0		0	0	0	0	0	0		0	0	0	0	0	0		0	0	0	0	0	0
248	2023-02-15	1834.2	1834.2	1834.2	1834.2	1834.2	1834.2	1834.2		0	0	0	0	0	0	0	0	0	0	0	0		0	0	0	0	0	0		0	0	0	0	0	0		0	0	0	0	0	0
249	2023-02-14	1854	1854.0	1854.0	1854.0	1854.0	1854.0	1854.0		0	0	0	0	0	0	0	0	0	0	0	0		0	0	0	0	0	0		0	0	0	0	0	0		0	0	0	0	0	0
250	2023-02-13	1851.9	1115.325	1854.756	1859.133	1855.486	1856.2	1198.389		-736.575	736.575	2.856	2.856	7.233	7.233	3.586	3.586	4.3	4.3	-653.511	653.511		542543	8.15674	52.3163	12.8594	18.49	427077		0.39774	-0.0015422	-0.00390572	-0.00193639	-0.00232194	0.352887		0.39774	0.0015422	0.00390572	0.00193639	0.00232194	0.352887
251	2023-02-10	1862.8	1862.8	1862.8	1862.8	1862.8	1862.8	1862.8		0	0	0	0	0	0	0	0	0	0	0	0		0	0	0	0	0	0		0	0	0	0	0	0		0	0	0	0	0	0
252	2023-02-09	1866.2	1115.325	1870.014	1862.3	1873.698	1870.1	1199.745		-750.875	750.875	3.814	3.814	-3.9	3.9	7.498	7.498	3.9	3.9	-666.455	666.455		563813	14.5466	15.21	56.22	15.21	444162		0.402355	-0.00204373	0.00208981	-0.00401779	-0.00208981	0.357119		0.402355	0.00204373	0.00208981	0.00401779	0.00208981	0.357119
253	2023-02-08	1877.4	1877.4	1877.4	1877.4	1877.4	1877.4	1877.4		0	0	0	0	0	0	0	0	0	0	0	0		0	0	0	0	0	0		0	0	0	0	0	0		0	0	0	0	0	0
254	2023-02-07	1871.7	1115.325	1868.700	1873.8	1871.382	1871.8	1199.589		-756.375	756.375	-3	3	2.1	2.1	-0.318	0.318	0.1	0.1	-672.111	672.111		572103	9	4.41	0.101124	0.01	451733		0.404111	0.00160282	-0.00112197	0.000169899	-5.34274e-05	0.359091		0.404111	0.00160282	0.00112197	0.000169899	5.34274e-05	0.359091
255	2023-02-06	1866.2	1866.2	1866.2	1866.2	1866.2	1866.2	1866.2		0	0	0	0	0	0	0	0	0	0	0	0		0	0	0	0	0	0		0	0	0	0	0	0		0	0	0	0	0	0
256	2023-02-03	1862.9	1115.325	1901.343	1886.267	1882.268	1903.775	1201.368		-747.575	747.575	38.443	38.443	23.367	23.367	19.368	19.368	40.875	40.875	-661.532	661.532		558868	1477.86	546.017	375.119	1670.77	437625		0.401296	-0.0206361	-0.0125433	-0.0103967	-0.0219416	0.355109		0.401296	0.0206361	0.0125433	0.0103967	0.0219416	0.355109
257	2023-02-02	1916.3	1916.3	1916.3	1916.3	1916.3	1916.3	1916.3		0	0	0	0	0	0	0	0	0	0	0	0		0	0	0	0	0	0		0	0	0	0	0	0		0	0	0	0	0	0
258	2023-02-01	1927.8	1927.8	1927.8	1927.8	1927.8	1927.8	1927.8		0	0	0	0	0	0	0	0	0	0	0	0		0	0	0	0	0	0		0	0	0	0	0	0		0	0	0	0	0	0
259	2023-01-31	1929.5	1115.325	1918.386	1902.833	1920.224	1927.960	1202.758		-814.175	814.175	-11.114	11.114	-26.667	26.667	-9.276	9.276	-1.54	1.54	-726.742	726.742		662881	123.521	711.129	86.0442	2.3716	528154		0.421962	0.00576004	0.0138207	0.00480746	0.000798134	0.376648		0.421962	0.00576004	0.0138207	0.00480746	0.000798134	0.376648
260	2023-01-30	1922.9	1115.325	1922.175	1926.433	1917.343	1928.120	1203.275		-807.575	807.575	-0.725	0.725	3.533	3.533	-5.557	5.557	5.22	5.22	-719.625	719.625		652177	0.525625	12.4821	30.8802	27.2484	517860		0.419978	0.000377035	-0.00183733	0.00288991	-0.00271465	0.374239		0.419978	0.000377035	0.00183733	0.00288991	0.00271465	0.374239
261	2023-01-27	1928.6	1928.6	1928.6	1928.6	1928.6	1928.6	1928.6		0	0	0	0	0	0	0	0	0	0	0	0		0	0	0	0	0	0		0	0	0	0	0	0		0	0	0	0	0	0
262	2023-01-26	1929.1	1929.1	1929.1	1929.1	1929.1	1929.1	1929.1		0	0	0	0	0	0	0	0	0	0	0	0		0	0	0	0	0	0		0	0	0	0	0	0		0	0	0	0	0	0
263	2023-01-25	1941.2	1941.2	1941.2	1941.2	1941.2	1941.2	1941.2		0	0	0	0	0	0	0	0	0	0	0	0		0	0	0	0	0	0		0	0	0	0	0	0		0	0	0	0	0	0
264	2023-01-24	1933.9	1933.9	1933.9	1933.9	1933.9	1933.9	1933.9		0	0	0	0	0	0	0	0	0	0	0	0		0	0	0	0	0	0		0	0	0	0	0	0		0	0	0	0	0	0
265	2023-01-23	1927.1	1927.1	1927.1	1927.1	1927.1	1927.1	1927.1		0	0	0	0	0	0	0	0	0	0	0	0		0	0	0	0	0	0		0	0	0	0	0	0		0	0	0	0	0	0
266	2023-01-20	1926.4	1926.4	1926.4	1926.4	1926.4	1926.4	1926.4		0	0	0	0	0	0	0	0	0	0	0	0		0	0	0	0	0	0		0	0	0	0	0	0		0	0	0	0	0	0
267	2023-01-19	1922.1	1922.1	1922.1	1922.1	1922.1	1922.1	1922.1		0	0	0	0	0	0	0	0	0	0	0	0		0	0	0	0	0	0		0	0	0	0	0	0		0	0	0	0	0	0
268	2023-01-18	1904.4	1115.325	1910.085	1908.5	1908.907	1914.650	1202.204		-789.075	789.075	5.685	5.685	4.1	4.1	4.507	4.507	10.25	10.25	-702.196	702.196		622639	32.3192	16.81	20.313	105.062	493079		0.414343	-0.00298519	-0.00215291	-0.00236662	-0.00538227	0.368723		0.414343	0.00298519	0.00215291	0.00236662	0.00538227	0.368723
269	2023-01-17	1907.2	1907.2	1907.2	1907.2	1907.2	1907.2	1907.2		0	0	0	0	0	0	0	0	0	0	0	0		0	0	0	0	0	0		0	0	0	0	0	0		0	0	0	0	0	0
270	2023-01-13	1918.4	1918.4	1918.4	1918.4	1918.4	1918.4	1918.4		0	0	0	0	0	0	0	0	0	0	0	0		0	0	0	0	0	0		0	0	0	0	0	0		0	0	0	0	0	0
271	2023-01-12	1895.5	1895.5	1895.5	1895.5	1895.5	1895.5	1895.5		0	0	0	0	0	0	0	0	0	0	0	0		0	0	0	0	0	0		0	0	0	0	0	0		0	0	0	0	0	0
272	2023-01-11	1874.6	1874.6	1874.6	1874.6	1874.6	1874.6	1874.6		0	0	0	0	0	0	0	0	0	0	0	0		0	0	0	0	0	0		0	0	0	0	0	0		0	0	0	0	0	0
273	2023-01-10	1871.6	1115.325	1874.914	1877.067	1875.160	1873.650	1199.947		-756.275	756.275	3.314	3.314	5.467	5.467	3.56	3.56	2.05	2.05	-671.653	671.653		571952	10.9826	29.8881	12.6736	4.2025	451118		0.404079	-0.00177068	-0.00292103	-0.00190212	-0.00109532	0.358866		0.404079	0.00177068	0.00292103	0.00190212	0.00109532	0.358866
274	2023-01-09	1872.7	1872.7	1872.7	1872.7	1872.7	1872.7	1872.7		0	0	0	0	0	0	0	0	0	0	0	0		0	0	0	0	0	0		0	0	0	0	0	0		0	0	0	0	0	0
275	2023-01-06	1864.2	1864.2	1864.2	1864.2	1864.2	1864.2	1864.2		0	0	0	0	0	0	0	0	0	0	0	0		0	0	0	0	0	0		0	0	0	0	0	0		0	0	0	0	0	0
276	2023-01-05	1834.8	1834.8	1834.8	1834.8	1834.8	1834.8	1834.8		0	0	0	0	0	0	0	0	0	0	0	0		0	0	0	0	0	0		0	0	0	0	0	0		0	0	0	0	0	0
277	2023-01-04	1852.8	1852.8	1852.8	1852.8	1852.8	1852.8	1852.8		0	0	0	0	0	0	0	0	0	0	0	0		0	0	0	0	0	0		0	0	0	0	0	0		0	0	0	0	0	0
278	2023-01-03	1839.7	1115.325	1832.470	1839.2	1839.198	1846.180	1196.653		-724.375	724.375	-7.23	7.23	-0.5	0.5	-0.502	0.502	6.48	6.48	-643.047	643.047		524719	52.2729	0.25	0.252004	41.9904	413509		0.393746	0.00392999	0.000271783	0.000272871	-0.00352231	0.349539		0.393746	0.00392999	0.000271783	0.000272871	0.00352231	0.349539
279	2022-12-30	1819.7	1819.7	1819.7	1819.7	1819.7	1819.7	1819.7		0	0	0	0	0	0	0	0	0	0	0	0		0	0	0	0	0	0		0	0	0	0	0	0		0	0	0	0	0	0
280	2022-12-29	1819.5	1819.5	1819.5	1819.5	1819.5	1819.5	1819.5		0	0	0	0	0	0	0	0	0	0	0	0		0	0	0	0	0	0		0	0	0	0	0	0		0	0	0	0	0	0
281	2022-12-28	1807.9	1115.325	1809.256	1807.433	1806.266	1817.150	1193.394		-692.575	692.575	1.356	1.356	-0.467	0.467	-1.634	1.634	9.25	9.25	-614.506	614.506		479660	1.83874	0.218089	2.66996	85.5625	377618		0.383083	-0.000750041	0.000258311	0.000903811	-0.00511643	0.3399		0.383083	0.000750041	0.000258311	0.000903811	0.00511643	0.3399
282	2022-12-27	1814.8	1814.8	1814.8	1814.8	1814.8	1814.8	1814.8		0	0	0	0	0	0	0	0	0	0	0	0		0	0	0	0	0	0		0	0	0	0	0	0		0	0	0	0	0	0
283	2022-12-23	1795.9	1795.9	1795.9	1795.9	1795.9	1795.9	1795.9		0	0	0	0	0	0	0	0	0	0	0	0		0	0	0	0	0	0		0	0	0	0	0	0		0	0	0	0	0	0
284	2022-12-22	1787	1115.325	1797.222	1787.333	1793.032	1805.9	1193.612		-671.675	671.675	10.222	10.222	0.333	0.333	6.032	6.032	18.9	18.9	-593.388	593.388		451147	104.489	0.110889	36.385	357.21	352109		0.375867	-0.0057202	-0.000186346	-0.00337549	-0.0105764	0.332058		0.375867	0.0057202	0.000186346	0.00337549	0.0105764	0.332058
285	2022-12-21	1815.9	1815.9	1815.9	1815.9	1815.9	1815.9	1815.9		0	0	0	0	0	0	0	0	0	0	0	0		0	0	0	0	0	0		0	0	0	0	0	0		0	0	0	0	0	0
286	2022-12-20	1815.9	1815.9	1815.9	1815.9	1815.9	1815.9	1815.9		0	0	0	0	0	0	0	0	0	0	0	0		0	0	0	0	0	0		0	0	0	0	0	0		0	0	0	0	0	0
287	2022-12-19	1787.7	1787.7	1787.7	1787.7	1787.7	1787.7	1787.7		0	0	0	0	0	0	0	0	0	0	0	0		0	0	0	0	0	0		0	0	0	0	0	0		0	0	0	0	0	0
288	2022-12-16	1790	1790.0	1790.0	1790.0	1790.0	1790.0	1790.0		0	0	0	0	0	0	0	0	0	0	0	0		0	0	0	0	0	0		0	0	0	0	0	0		0	0	0	0	0	0
289	2022-12-15	1777.2	1777.2	1777.2	1777.2	1777.2	1777.2	1777.2		0	0	0	0	0	0	0	0	0	0	0	0		0	0	0	0	0	0		0	0	0	0	0	0		0	0	0	0	0	0
290	2022-12-14	1807.5	1807.5	1807.5	1807.5	1807.5	1807.5	1807.5		0	0	0	0	0	0	0	0	0	0	0	0		0	0	0	0	0	0		0	0	0	0	0	0		0	0	0	0	0	0
291	2022-12-13	1813.9	1813.9	1813.9	1813.9	1813.9	1813.9	1813.9		0	0	0	0	0	0	0	0	0	0	0	0		0	0	0	0	0	0		0	0	0	0	0	0		0	0	0	0	0	0
292	2022-12-12	1780.5	1115.325	1784.533	1786.267	1781.342	1809.950	1191.392		-665.175	665.175	4.033	4.033	5.767	5.767	0.842	0.842	29.45	29.45	-589.108	589.108		442458	16.2651	33.2583	0.708964	867.303	347048		0.373589	-0.00226509	-0.00323898	-0.000472901	-0.0165403	0.330867		0.373589	0.00226509	0.00323898	0.000472901	0.0165403	0.330867
293	2022-12-09	1798.1	1798.1	1798.1	1798.1	1798.1	1798.1	1798.1		0	0	0	0	0	0	0	0	0	0	0	0		0	0	0	0	0	0		0	0	0	0	0	0		0	0	0	0	0	0
294	2022-12-08	1788.7	1788.7	1788.7	1788.7	1788.7	1788.7	1788.7		0	0	0	0	0	0	0	0	0	0	0	0		0	0	0	0	0	0		0	0	0	0	0	0		0	0	0	0	0	0
295	2022-12-07	1785.5	1785.5	1785.5	1785.5	1785.5	1785.5	1785.5		0	0	0	0	0	0	0	0	0	0	0	0		0	0	0	0	0	0		0	0	0	0	0	0		0	0	0	0	0	0
296	2022-12-06	1769.3	1769.3	1769.3	1769.3	1769.3	1769.3	1769.3		0	0	0	0	0	0	0	0	0	0	0	0		0	0	0	0	0	0		0	0	0	0	0	0		0	0	0	0	0	0
297	2022-12-05	1767.4	1767.4	1767.4	1767.4	1767.4	1767.4	1767.4		0	0	0	0	0	0	0	0	0	0	0	0		0	0	0	0	0	0		0	0	0	0	0	0		0	0	0	0	0	0
298	2022-12-02	1795.9	1795.9	1795.9	1795.9	1795.9	1795.9	1795.9		0	0	0	0	0	0	0	0	0	0	0	0		0	0	0	0	0	0		0	0	0	0	0	0		0	0	0	0	0	0
299	2022-12-01	1801.1	1801.1	1801.1	1801.1	1801.1	1801.1	1801.1		0	0	0	0	0	0	0	0	0	0	0	0		0	0	0	0	0	0		0	0	0	0	0	0		0	0	0	0	0	0
300	2022-11-30	1746	1746.0	1746.0	1746.0	1746.0	1746.0	1746.0		0	0	0	0	0	0	0	0	0	0	0	0		0	0	0	0	0	0		0	0	0	0	0	0		0	0	0	0	0	0
301	2022-11-29	1748.4	1748.4	1748.4	1748.4	1748.4	1748.4	1748.4		0	0	0	0	0	0	0	0	0	0	0	0		0	0	0	0	0	0		0	0	0	0	0	0		0	0	0	0	0	0
302	2022-11-28	1740.1	1740.1	1740.1	1740.1	1740.1	1740.1	1740.1		0	0	0	0	0	0	0	0	0	0	0	0		0	0	0	0	0	0		0	0	0	0	0	0		0	0	0	0	0	0
303	2022-11-25	1753.3	1753.3	1753.3	1753.3	1753.3	1753.3	1753.3		0	0	0	0	0	0	0	0	0	0	0	0		0	0	0	0	0	0		0	0	0	0	0	0		0	0	0	0	0	0
304	2022-11-23	1744.9	1744.9	1744.9	1744.9	1744.9	1744.9	1744.9		0	0	0	0	0	0	0	0	0	0	0	0		0	0	0	0	0	0		0	0	0	0	0	0		0	0	0	0	0	0
305	2022-11-22	1738.3	1738.3	1738.3	1738.3	1738.3	1738.3	1738.3		0	0	0	0	0	0	0	0	0	0	0	0		0	0	0	0	0	0		0	0	0	0	0	0		0	0	0	0	0	0
306	2022-11-21	1737.4	1737.4	1737.4	1737.4	1737.4	1737.4	1737.4		0	0	0	0	0	0	0	0	0	0	0	0		0	0	0	0	0	0		0	0	0	0	0	0		0	0	0	0	0	0
307	2022-11-18	1751.9	1751.9	1751.9	1751.9	1751.9	1751.9	1751.9		0	0	0	0	0	0	0	0	0	0	0	0		0	0	0	0	0	0		0	0	0	0	0	0		0	0	0	0	0	0
308	2022-11-17	1760.8	1760.8	1760.8	1760.8	1760.8	1760.8	1760.8		0	0	0	0	0	0	0	0	0	0	0	0		0	0	0	0	0	0		0	0	0	0	0	0		0	0	0	0	0	0
309	2022-11-16	1773	1773.0	1773.0	1773.0	1773.0	1773.0	1773.0		0	0	0	0	0	0	0	0	0	0	0	0		0	0	0	0	0	0		0	0	0	0	0	0		0	0	0	0	0	0
310	2022-11-15	1773.8	1773.8	1773.8	1773.8	1773.8	1773.8	1773.8		0	0	0	0	0	0	0	0	0	0	0	0		0	0	0	0	0	0		0	0	0	0	0	0		0	0	0	0	0	0
311	2022-11-14	1773.6	1773.6	1773.6	1773.6	1773.6	1773.6	1773.6		0	0	0	0	0	0	0	0	0	0	0	0		0	0	0	0	0	0		0	0	0	0	0	0		0	0	0	0	0	0
312	2022-11-11	1766	1766.0	1766.0	1766.0	1766.0	1766.0	1766.0		0	0	0	0	0	0	0	0	0	0	0	0		0	0	0	0	0	0		0	0	0	0	0	0		0	0	0	0	0	0
313	2022-11-10	1750.3	1750.3	1750.3	1750.3	1750.3	1750.3	1750.3		0	0	0	0	0	0	0	0	0	0	0	0		0	0	0	0	0	0		0	0	0	0	0	0		0	0	0	0	0	0
314	2022-11-09	1710.1	1710.1	1710.1	1710.1	1710.1	1710.1	1710.1		0	0	0	0	0	0	0	0	0	0	0	0		0	0	0	0	0	0		0	0	0	0	0	0		0	0	0	0	0	0
315	2022-11-08	1712.1	1712.1	1712.1	1712.1	1712.1	1712.1	1712.1		0	0	0	0	0	0	0	0	0	0	0	0		0	0	0	0	0	0		0	0	0	0	0	0		0	0	0	0	0	0
316	2022-11-07	1676.5	1676.5	1676.5	1676.5	1676.5	1676.5	1676.5		0	0	0	0	0	0	0	0	0	0	0	0		0	0	0	0	0	0		0	0	0	0	0	0		0	0	0	0	0	0
317	2022-11-03	1672.5	1672.5	1672.5	1672.5	1672.5	1672.5	1672.5		0	0	0	0	0	0	0	0	0	0	0	0		0	0	0	0	0	0		0	0	0	0	0	0		0	0	0	0	0	0
318	2022-11-02	1627.3	1627.3	1627.3	1627.3	1627.3	1627.3	1627.3		0	0	0	0	0	0	0	0	0	0	0	0		0	0	0	0	0	0		0	0	0	0	0	0		0	0	0	0	0	0
319	2022-11-01	1645.7	1645.7	1645.7	1645.7	1645.7	1645.7	1645.7		0	0	0	0	0	0	0	0	0	0	0	0		0	0	0	0	0	0		0	0	0	0	0	0		0	0	0	0	0	0
320	2022-10-31	1645	1645.0	1645.0	1645.0	1645.0	1645.0	1645.0		0	0	0	0	0	0	0	0	0	0	0	0		0	0	0	0	0	0		0	0	0	0	0	0		0	0	0	0	0	0
321	2022-10-30	1635.9	1635.9	1635.9	1635.9	1635.9	1635.9	1635.9		0	0	0	0	0	0	0	0	0	0	0	0		0	0	0	0	0	0		0	0	0	0	0	0		0	0	0	0	0	0
322	2022-10-27	1639.6	1639.6	1639.6	1639.6	1639.6	1639.6	1639.6		0	0	0	0	0	0	0	0	0	0	0	0		0	0	0	0	0	0		0	0	0	0	0	0		0	0	0	0	0	0
323	2022-10-26	1660.7	1660.7	1660.7	1660.7	1660.7	1660.7	1660.7		0	0	0	0	0	0	0	0	0	0	0	0		0	0	0	0	0	0		0	0	0	0	0	0		0	0	0	0	0	0
324	2022-10-25	1664	1664.0	1664.0	1664.0	1664.0	1664.0	1664.0		0	0	0	0	0	0	0	0	0	0	0	0		0	0	0	0	0	0		0	0	0	0	0	0		0	0	0	0	0	0
325	2022-10-24	1652.8	1652.8	1652.8	1652.8	1652.8	1652.8	1652.8		0	0	0	0	0	0	0	0	0	0	0	0		0	0	0	0	0	0		0	0	0	0	0	0		0	0	0	0	0	0
326	2022-10-23	1648.7	1115.325	1654.620	1652.367	1656.651	1652.350	1175.306		-533.375	533.375	5.92	5.92	3.667	3.667	7.951	7.951	3.65	3.65	-473.394	473.394		284489	35.0464	13.4469	63.2184	13.3225	224102		0.323512	-0.00359071	-0.00222418	-0.00482259	-0.00221387	0.287132		0.323512	0.00359071	0.00222418	0.00482259	0.00221387	0.287132
327	2022-10-20	1651	1651.0	1651.0	1651.0	1651.0	1651.0	1651.0		0	0	0	0	0	0	0	0	0	0	0	0		0	0	0	0	0	0		0	0	0	0	0	0		0	0	0	0	0	0
328	2022-10-19	1630.8	1630.8	1630.8	1630.8	1630.8	1630.8	1630.8		0	0	0	0	0	0	0	0	0	0	0	0		0	0	0	0	0	0		0	0	0	0	0	0		0	0	0	0	0	0
329	2022-10-18	1627.5	1115.325	1638.014	1633.633	1630.522	1639.533	1172.114		-512.175	512.175	10.514	10.514	6.133	6.133	3.022	3.022	12.033	12.033	-455.386	455.386		262323	110.544	37.6137	9.13248	144.793	207376		0.3147	-0.00646022	-0.00376836	-0.00185684	-0.00739355	0.279807		0.3147	0.00646022	0.00376836	0.00185684	0.00739355	0.279807
330	2022-10-17	1649	1115.325	1654.620	1641.9	1655.926	1648.267	1174.485		-533.675	533.675	5.62	5.62	-7.1	7.1	6.926	6.926	-0.733	0.733	-474.515	474.515		284809	31.5844	50.41	47.9695	0.537289	225164		0.323636	-0.00340813	0.00430564	-0.00420012	0.000444512	0.287759		0.323636	0.00340813	0.00430564	0.00420012	0.000444512	0.287759
331	2022-10-16	1657	1657.0	1657.0	1657.0	1657.0	1657.0	1657.0		0	0	0	0	0	0	0	0	0	0	0	0		0	0	0	0	0	0		0	0	0	0	0	0		0	0	0	0	0	0
332	2022-10-13	1641.7	1641.7	1641.7	1641.7	1641.7	1641.7	1641.7		0	0	0	0	0	0	0	0	0	0	0	0		0	0	0	0	0	0		0	0	0	0	0	0		0	0	0	0	0	0
333	2022-10-12	1670	1670.0	1670.0	1670.0	1670.0	1670.0	1670.0		0	0	0	0	0	0	0	0	0	0	0	0		0	0	0	0	0	0		0	0	0	0	0	0		0	0	0	0	0	0
334	2022-10-11	1670.3	1670.3	1670.3	1670.3	1670.3	1670.3	1670.3		0	0	0	0	0	0	0	0	0	0	0	0		0	0	0	0	0	0		0	0	0	0	0	0		0	0	0	0	0	0
335	2022-10-10	1678.7	1678.7	1678.7	1678.7	1678.7	1678.7	1678.7		0	0	0	0	0	0	0	0	0	0	0	0		0	0	0	0	0	0		0	0	0	0	0	0		0	0	0	0	0	0
336	2022-10-09	1667.3	1667.3	1667.3	1667.3	1667.3	1667.3	1667.3		0	0	0	0	0	0	0	0	0	0	0	0		0	0	0	0	0	0		0	0	0	0	0	0		0	0	0	0	0	0
337	2022-10-06	1700.5	1700.5	1700.5	1700.5	1700.5	1700.5	1700.5		0	0	0	0	0	0	0	0	0	0	0	0		0	0	0	0	0	0		0	0	0	0	0	0		0	0	0	0	0	0
338	2022-10-05	1711.7	1711.7	1711.7	1711.7	1711.7	1711.7	1711.7		0	0	0	0	0	0	0	0	0	0	0	0		0	0	0	0	0	0		0	0	0	0	0	0		0	0	0	0	0	0
339	2022-10-04	1711.4	1115.325	1706.886	1709.333	1711.189	1716.4	1183.147		-596.075	596.075	-4.514	4.514	-2.067	2.067	-0.211	0.211	5	5	-528.253	528.253		355305	20.3762	4.27249	0.044521	25	279051		0.348297	0.00263761	0.00120778	0.000123291	-0.00292158	0.308667		0.348297	0.00263761	0.00120778	0.000123291	0.00292158	0.308667
340	2022-10-03	1721.1	1721.1	1721.1	1721.1	1721.1	1721.1	1721.1		0	0	0	0	0	0	0	0	0	0	0	0		0	0	0	0	0	0		0	0	0	0	0	0		0	0	0	0	0	0
341	2022-10-02	1692.9	1115.325	1674.040	1691.067	1682.237	1706.425	1177.717		-577.575	577.575	-18.86	18.86	-1.833	1.833	-10.663	10.663	13.525	13.525	-515.183	515.183		333593	355.7	3.35989	113.7	182.926	265414		0.341175	0.0111406	0.00108276	0.00629866	-0.00798925	0.30432		0.341175	0.0111406	0.00108276	0.00629866	0.00798925	0.30432
342	2022-09-29	1662.4	1662.4	1662.4	1662.4	1662.4	1662.4	1662.4		0	0	0	0	0	0	0	0	0	0	0	0		0	0	0	0	0	0		0	0	0	0	0	0		0	0	0	0	0	0
343	2022-09-28	1658.5	1115.325	1645.106	1647.033	1644.980	1661.4	1174.657		-543.175	543.175	-13.394	13.394	-11.467	11.467	-13.52	13.52	2.9	2.9	-483.843	483.843		295039	179.399	131.492	182.79	8.41	234104		0.32751	0.00807597	0.00691408	0.00815194	-0.00174857	0.291735		0.32751	0.00807597	0.00691408	0.00815194	0.00174857	0.291735
344	2022-09-27	1660.4	1660.4	1660.4	1660.4	1660.4	1660.4	1660.4		0	0	0	0	0	0	0	0	0	0	0	0		0	0	0	0	0	0		0	0	0	0	0	0		0	0	0	0	0	0
345	2022-09-26	1626.7	1115.325	1625.025	1635.167	1630.439	1641.850	1171.803		-511.375	511.375	-1.675	1.675	8.467	8.467	3.739	3.739	15.15	15.15	-454.897	454.897		261504	2.80562	71.6901	13.9801	229.522	206931		0.314363	0.00102969	-0.00520502	-0.00229852	-0.00931333	0.279644		0.314363	0.00102969	0.00520502	0.00229852	0.00931333	0.279644
346	2022-09-25	1623.3	1623.3	1623.3	1623.3	1623.3	1623.3	1623.3		0	0	0	0	0	0	0	0	0	0	0	0		0	0	0	0	0	0		0	0	0	0	0	0		0	0	0	0	0	0
347	2022-09-22	1645.3	1645.3	1645.3	1645.3	1645.3	1645.3	1645.3		0	0	0	0	0	0	0	0	0	0	0	0		0	0	0	0	0	0		0	0	0	0	0	0		0	0	0	0	0	0
348	2022-09-21	1670.8	1670.8	1670.8	1670.8	1670.8	1670.8	1670.8		0	0	0	0	0	0	0	0	0	0	0	0		0	0	0	0	0	0		0	0	0	0	0	0		0	0	0	0	0	0
349	2022-09-20	1664.6	1664.6	1664.6	1664.6	1664.6	1664.6	1664.6		0	0	0	0	0	0	0	0	0	0	0	0		0	0	0	0	0	0		0	0	0	0	0	0		0	0	0	0	0	0
350	2022-09-19	1659.7	1115.325	1659.208	1660.333	1657.569	1666.020	1175.528		-544.375	544.375	-0.492	0.492	0.633	0.633	-2.131	2.131	6.32	6.32	-484.172	484.172		296344	0.242064	0.400689	4.54116	39.9424	234423		0.327996	0.000296439	-0.000381394	0.00128397	-0.00380792	0.291723		0.327996	0.000296439	0.000381394	0.00128397	0.00380792	0.291723
351	2022-09-18	1666.2	1115.325	1664.836	1666.167	1661.286	1667.440	1176.002		-550.875	550.875	-1.364	1.364	-0.033	0.033	-4.914	4.914	1.24	1.24	-490.198	490.198		303463	1.8605	0.001089	24.1474	1.5376	240294		0.330618	0.000818629	1.98055e-05	0.00294923	-0.000744208	0.294201		0.330618	0.000818629	1.98055e-05	0.00294923	0.000744208	0.294201
352	2022-09-15	1671.7	1671.7	1671.7	1671.7	1671.7	1671.7	1671.7		0	0	0	0	0	0	0	0	0	0	0	0		0	0	0	0	0	0		0	0	0	0	0	0		0	0	0	0	0	0
353	2022-09-14	1665.4	1665.4	1665.4	1665.4	1665.4	1665.4	1665.4		0	0	0	0	0	0	0	0	0	0	0	0		0	0	0	0	0	0		0	0	0	0	0	0		0	0	0	0	0	0
354	2022-09-13	1696.5	1696.5	1696.5	1696.5	1696.5	1696.5	1696.5		0	0	0	0	0	0	0	0	0	0	0	0		0	0	0	0	0	0		0	0	0	0	0	0		0	0	0	0	0	0
355	2022-09-12	1705	1705.0	1705.0	1705.0	1705.0	1705.0	1705.0		0	0	0	0	0	0	0	0	0	0	0	0		0	0	0	0	0	0		0	0	0	0	0	0		0	0	0	0	0	0
356	2022-09-11	1728.1	1728.1	1728.1	1728.1	1728.1	1728.1	1728.1		0	0	0	0	0	0	0	0	0	0	0	0		0	0	0	0	0	0		0	0	0	0	0	0		0	0	0	0	0	0
357	2022-09-08	1716.2	1716.2	1716.2	1716.2	1716.2	1716.2	1716.2		0	0	0	0	0	0	0	0	0	0	0	0		0	0	0	0	0	0		0	0	0	0	0	0		0	0	0	0	0	0
358	2022-09-07	1708	1708.0	1708.0	1708.0	1708.0	1708.0	1708.0		0	0	0	0	0	0	0	0	0	0	0	0		0	0	0	0	0	0		0	0	0	0	0	0		0	0	0	0	0	0
359	2022-09-06	1715.3	1115.325	1710.555	1707.233	1704.422	1708.3	1181.052		-599.975	599.975	-4.745	4.745	-8.067	8.067	-10.878	10.878	-7	7	-534.248	534.248		359970	22.515	65.0765	118.331	49	285421		0.349778	0.00276628	0.00470297	0.00634175	0.00408092	0.31146		0.349778	0.00276628	0.00470297	0.00634175	0.00408092	0.31146
360	2022-09-05	1700.4	1115.325	1706.886	1705.667	1703.060	1708.6	1182.006		-585.075	585.075	6.486	6.486	5.267	5.267	2.66	2.66	8.2	8.2	-518.394	518.394		342313	42.0682	27.7413	7.0756	67.24	268732		0.344081	-0.0038144	-0.00309751	-0.00156434	-0.00482239	0.304866		0.344081	0.0038144	0.00309751	0.00156434	0.00482239	0.304866
361	2022-09-01	1709.8	1709.8	1709.8	1709.8	1709.8	1709.8	1709.8		0	0	0	0	0	0	0	0	0	0	0	0		0	0	0	0	0	0		0	0	0	0	0	0		0	0	0	0	0	0
362	2022-08-31	1696.6	1696.6	1696.6	1696.6	1696.6	1696.6	1696.6		0	0	0	0	0	0	0	0	0	0	0	0		0	0	0	0	0	0		0	0	0	0	0	0		0	0	0	0	0	0
363	2022-08-30	1712.8	1712.8	1712.8	1712.8	1712.8	1712.8	1712.8		0	0	0	0	0	0	0	0	0	0	0	0		0	0	0	0	0	0		0	0	0	0	0	0		0	0	0	0	0	0
364	2022-08-29	1723.2	1115.325	1724.091	1723.533	1723.418	1724.7	1184.938		-607.875	607.875	0.891	0.891	0.333	0.333	0.218	0.218	1.5	1.5	-538.262	538.262		369512	0.793881	0.110889	0.047524	2.25	289726		0.352759	-0.000517061	-0.000193245	-0.000126509	-0.000870474	0.312362		0.352759	0.000517061	0.000193245	0.000126509	0.000870474	0.312362
365	2022-08-28	1736.6	1736.6	1736.6	1736.6	1736.6	1736.6	1736.6		0	0	0	0	0	0	0	0	0	0	0	0		0	0	0	0	0	0		0	0	0	0	0	0		0	0	0	0	0	0
366	2022-08-25	1736.1	1736.1	1736.1	1736.1	1736.1	1736.1	1736.1		0	0	0	0	0	0	0	0	0	0	0	0		0	0	0	0	0	0		0	0	0	0	0	0		0	0	0	0	0	0
367	2022-08-24	1757.7	1757.7	1757.7	1757.7	1757.7	1757.7	1757.7		0	0	0	0	0	0	0	0	0	0	0	0		0	0	0	0	0	0		0	0	0	0	0	0		0	0	0	0	0	0
368	2022-08-23	1747.8	1747.8	1747.8	1747.8	1747.8	1747.8	1747.8		0	0	0	0	0	0	0	0	0	0	0	0		0	0	0	0	0	0		0	0	0	0	0	0		0	0	0	0	0	0
369	2022-08-22	1746.8	1746.8	1746.8	1746.8	1746.8	1746.8	1746.8		0	0	0	0	0	0	0	0	0	0	0	0		0	0	0	0	0	0		0	0	0	0	0	0		0	0	0	0	0	0
370	2022-08-21	1734	1734.0	1734.0	1734.0	1734.0	1734.0	1734.0		0	0	0	0	0	0	0	0	0	0	0	0		0	0	0	0	0	0		0	0	0	0	0	0		0	0	0	0	0	0
371	2022-08-18	1747.6	1747.6	1747.6	1747.6	1747.6	1747.6	1747.6		0	0	0	0	0	0	0	0	0	0	0	0		0	0	0	0	0	0		0	0	0	0	0	0		0	0	0	0	0	0
372	2022-08-17	1755.3	1755.3	1755.3	1755.3	1755.3	1755.3	1755.3		0	0	0	0	0	0	0	0	0	0	0	0		0	0	0	0	0	0		0	0	0	0	0	0		0	0	0	0	0	0
373	2022-08-16	1760.3	1760.3	1760.3	1760.3	1760.3	1760.3	1760.3		0	0	0	0	0	0	0	0	0	0	0	0		0	0	0	0	0	0		0	0	0	0	0	0		0	0	0	0	0	0
374	2022-08-15	1773.2	1773.2	1773.2	1773.2	1773.2	1773.2	1773.2		0	0	0	0	0	0	0	0	0	0	0	0		0	0	0	0	0	0		0	0	0	0	0	0		0	0	0	0	0	0
375	2022-08-14	1781.4	1781.4	1781.4	1781.4	1781.4	1781.4	1781.4		0	0	0	0	0	0	0	0	0	0	0	0		0	0	0	0	0	0		0	0	0	0	0	0		0	0	0	0	0	0
376	2022-08-11	1798.6	1798.6	1798.6	1798.6	1798.6	1798.6	1798.6		0	0	0	0	0	0	0	0	0	0	0	0		0	0	0	0	0	0		0	0	0	0	0	0		0	0	0	0	0	0
377	2022-08-10	1789.7	1789.7	1789.7	1789.7	1789.7	1789.7	1789.7		0	0	0	0	0	0	0	0	0	0	0	0		0	0	0	0	0	0		0	0	0	0	0	0		0	0	0	0	0	0
378	2022-08-09	1795.6	1795.6	1795.6	1795.6	1795.6	1795.6	1795.6		0	0	0	0	0	0	0	0	0	0	0	0		0	0	0	0	0	0		0	0	0	0	0	0		0	0	0	0	0	0
379	2022-08-08	1794	1794.0	1794.0	1794.0	1794.0	1794.0	1794.0		0	0	0	0	0	0	0	0	0	0	0	0		0	0	0	0	0	0		0	0	0	0	0	0		0	0	0	0	0	0
380	2022-08-07	1786.8	1786.8	1786.8	1786.8	1786.8	1786.8	1786.8		0	0	0	0	0	0	0	0	0	0	0	0		0	0	0	0	0	0		0	0	0	0	0	0		0	0	0	0	0	0
381	2022-08-04	1772.9	1772.9	1772.9	1772.9	1772.9	1772.9	1772.9		0	0	0	0	0	0	0	0	0	0	0	0		0	0	0	0	0	0		0	0	0	0	0	0		0	0	0	0	0	0
382	2022-08-03	1788.5	1788.5	1788.5	1788.5	1788.5	1788.5	1788.5		0	0	0	0	0	0	0	0	0	0	0	0		0	0	0	0	0	0		0	0	0	0	0	0		0	0	0	0	0	0
383	2022-08-02	1758	1115.325	1767.057	1763.9	1759.969	1779.8	1188.363		-642.675	642.675	9.057	9.057	5.9	5.9	1.969	1.969	21.8	21.8	-569.637	569.637		413031	82.0292	34.81	3.87696	475.24	324486		0.365572	-0.00515188	-0.00335609	-0.00112002	-0.0124005	0.324026		0.365572	0.00515188	0.00335609	0.00112002	0.0124005	0.324026
384	2022-08-01	1771.1	1771.1	1771.1	1771.1	1771.1	1771.1	1771.1		0	0	0	0	0	0	0	0	0	0	0	0		0	0	0	0	0	0		0	0	0	0	0	0		0	0	0	0	0	0
385	2022-07-31	1769	1769.0	1769.0	1769.0	1769.0	1769.0	1769.0		0	0	0	0	0	0	0	0	0	0	0	0		0	0	0	0	0	0		0	0	0	0	0	0		0	0	0	0	0	0
386	2022-07-28	1762.9	1762.9	1762.9	1762.9	1762.9	1762.9	1762.9		0	0	0	0	0	0	0	0	0	0	0	0		0	0	0	0	0	0		0	0	0	0	0	0		0	0	0	0	0	0
387	2022-07-27	1750.3	1750.3	1750.3	1750.3	1750.3	1750.3	1750.3		0	0	0	0	0	0	0	0	0	0	0	0		0	0	0	0	0	0		0	0	0	0	0	0		0	0	0	0	0	0
388	2022-07-26	1719.1	1115.325	1718.425	1717.233	1715.677	1739.867	1183.304		-603.775	603.775	-0.675	0.675	-1.867	1.867	-3.423	3.423	20.767	20.767	-535.796	535.796		364544	0.455625	3.48569	11.7169	431.268	287077		0.351216	0.000392647	0.00108603	0.00199116	-0.0120802	0.311672		0.351216	0.000392647	0.00108603	0.00199116	0.0120802	0.311672
389	2022-07-25	1717.7	1115.325	1718.425	1717.233	1715.491	1729.433	1183.152		-602.375	602.375	0.725	0.725	-0.467	0.467	-2.209	2.209	11.733	11.733	-534.548	534.548		362856	0.525625	0.218089	4.87968	137.663	285742		0.350687	-0.000422076	0.000271875	0.00128602	-0.00683065	0.3112		0.350687	0.000422076	0.000271875	0.00128602	0.00683065	0.3112
390	2022-07-24	1719	1719.0	1719.0	1719.0	1719.0	1719.0	1719.0		0	0	0	0	0	0	0	0	0	0	0	0		0	0	0	0	0	0		0	0	0	0	0	0		0	0	0	0	0	0
391	2022-07-21	1727.1	1727.1	1727.1	1727.1	1727.1	1727.1	1727.1		0	0	0	0	0	0	0	0	0	0	0	0		0	0	0	0	0	0		0	0	0	0	0	0		0	0	0	0	0	0
392	2022-07-20	1712.7	1115.325	1710.555	1713.533	1706.989	1713.3	1180.058		-597.375	597.375	-2.145	2.145	0.833	0.833	-5.711	5.711	0.6	0.6	-532.642	532.642		356857	4.60102	0.693889	32.6155	0.36	283708		0.348791	0.00125241	-0.000486367	0.0033345	-0.000350324	0.310996		0.348791	0.00125241	0.000486367	0.0033345	0.000350324	0.310996
393	2022-07-19	1699.5	1699.5	1699.5	1699.5	1699.5	1699.5	1699.5		0	0	0	0	0	0	0	0	0	0	0	0		0	0	0	0	0	0		0	0	0	0	0	0		0	0	0	0	0	0
394	2022-07-18	1710	1710.0	1710.0	1710.0	1710.0	1710.0	1710.0		0	0	0	0	0	0	0	0	0	0	0	0		0	0	0	0	0	0		0	0	0	0	0	0		0	0	0	0	0	0
395	2022-07-17	1709.2	1709.2	1709.2	1709.2	1709.2	1709.2	1709.2		0	0	0	0	0	0	0	0	0	0	0	0		0	0	0	0	0	0		0	0	0	0	0	0		0	0	0	0	0	0
396	2022-07-14	1702.4	1702.4	1702.4	1702.4	1702.4	1702.4	1702.4		0	0	0	0	0	0	0	0	0	0	0	0		0	0	0	0	0	0		0	0	0	0	0	0		0	0	0	0	0	0
397	2022-07-13	1704.5	1704.5	1704.5	1704.5	1704.5	1704.5	1704.5		0	0	0	0	0	0	0	0	0	0	0	0		0	0	0	0	0	0		0	0	0	0	0	0		0	0	0	0	0	0
398	2022-07-12	1734.2	1734.2	1734.2	1734.2	1734.2	1734.2	1734.2		0	0	0	0	0	0	0	0	0	0	0	0		0	0	0	0	0	0		0	0	0	0	0	0		0	0	0	0	0	0
399	2022-07-11	1723.3	1723.3	1723.3	1723.3	1723.3	1723.3	1723.3		0	0	0	0	0	0	0	0	0	0	0	0		0	0	0	0	0	0		0	0	0	0	0	0		0	0	0	0	0	0
400	2022-07-10	1730	1730.0	1730.0	1730.0	1730.0	1730.0	1730.0		0	0	0	0	0	0	0	0	0	0	0	0		0	0	0	0	0	0		0	0	0	0	0	0		0	0	0	0	0	0
401	2022-07-07	1740.6	1740.6	1740.6	1740.6	1740.6	1740.6	1740.6		0	0	0	0	0	0	0	0	0	0	0	0		0	0	0	0	0	0		0	0	0	0	0	0		0	0	0	0	0	0
402	2022-07-06	1737.9	1737.9	1737.9	1737.9	1737.9	1737.9	1737.9		0	0	0	0	0	0	0	0	0	0	0	0		0	0	0	0	0	0		0	0	0	0	0	0		0	0	0	0	0	0
403	2022-07-05	1734.9	1734.9	1734.9	1734.9	1734.9	1734.9	1734.9		0	0	0	0	0	0	0	0	0	0	0	0		0	0	0	0	0	0		0	0	0	0	0	0		0	0	0	0	0	0
404	2022-07-04	1761.8	1761.8	1761.8	1761.8	1761.8	1761.8	1761.8		0	0	0	0	0	0	0	0	0	0	0	0		0	0	0	0	0	0		0	0	0	0	0	0		0	0	0	0	0	0
405	2022-06-30	1798.9	1798.9	1798.9	1798.9	1798.9	1798.9	1798.9		0	0	0	0	0	0	0	0	0	0	0	0		0	0	0	0	0	0		0	0	0	0	0	0		0	0	0	0	0	0
406	2022-06-29	1804.1	1804.1	1804.1	1804.1	1804.1	1804.1	1804.1		0	0	0	0	0	0	0	0	0	0	0	0		0	0	0	0	0	0		0	0	0	0	0	0		0	0	0	0	0	0
407	2022-06-28	1813.7	1115.325	1821.567	1826.567	1825.375	1810.8	1195.019		-698.375	698.375	7.867	7.867	12.867	12.867	11.675	11.675	-2.9	2.9	-618.681	618.681		487728	61.8897	165.56	136.306	8.41	382766		0.385055	-0.00433754	-0.00709434	-0.00643712	0.00159894	0.341115		0.385055	0.00433754	0.00709434	0.00643712	0.00159894	0.341115
408	2022-06-27	1817.5	1817.5	1817.5	1817.5	1817.5	1817.5	1817.5		0	0	0	0	0	0	0	0	0	0	0	0		0	0	0	0	0	0		0	0	0	0	0	0		0	0	0	0	0	0
409	2022-06-26	1820.9	1820.9	1820.9	1820.9	1820.9	1820.9	1820.9		0	0	0	0	0	0	0	0	0	0	0	0		0	0	0	0	0	0		0	0	0	0	0	0		0	0	0	0	0	0
410	2022-06-23	1826.5	1115.325	1824.783	1824.1	1820.115	1824.5	1195.065		-711.175	711.175	-1.717	1.717	-2.4	2.4	-6.385	6.385	-2	2	-631.435	631.435		505770	2.94809	5.76	40.7682	4	398710		0.389365	0.000940049	0.00131399	0.00349576	0.00109499	0.345708		0.389365	0.000940049	0.00131399	0.00349576	0.00109499	0.345708
411	2022-06-22	1825.7	1825.7	1825.7	1825.7	1825.7	1825.7	1825.7		0	0	0	0	0	0	0	0	0	0	0	0		0	0	0	0	0	0		0	0	0	0	0	0		0	0	0	0	0	0
412	2022-06-21	1834.3	1834.3	1834.3	1834.3	1834.3	1834.3	1834.3		0	0	0	0	0	0	0	0	0	0	0	0		0	0	0	0	0	0		0	0	0	0	0	0		0	0	0	0	0	0
413	2022-06-20	1834.6	1115.325	1832.470	1835.3	1834.549	1836.2	1196.403		-719.275	719.275	-2.13	2.13	0.7	0.7	-0.051	0.051	1.6	1.6	-638.197	638.197		517357	4.5369	0.49	0.002601	2.56	407295		0.392061	0.00116102	-0.000381555	2.7799e-05	-0.000872125	0.347867		0.392061	0.00116102	0.000381555	2.7799e-05	0.000872125	0.347867
414	2022-06-16	1835.6	1115.325	1839.829	1838.9	1836.859	1843.8	1197.535		-720.275	720.275	4.229	4.229	3.3	3.3	1.259	1.259	8.2	8.2	-638.065	638.065		518796	17.8844	10.89	1.58508	67.24	407127		0.392392	-0.00230388	-0.00179778	-0.000685879	-0.0044672	0.347606		0.392392	0.00230388	0.00179778	0.000685879	0.0044672	0.347606
415	2022-06-15	1845.7	1845.7	1845.7	1845.7	1845.7	1845.7	1845.7		0	0	0	0	0	0	0	0	0	0	0	0		0	0	0	0	0	0		0	0	0	0	0	0		0	0	0	0	0	0
416	2022-06-14	1815.3	1815.3	1815.3	1815.3	1815.3	1815.3	1815.3		0	0	0	0	0	0	0	0	0	0	0	0		0	0	0	0	0	0		0	0	0	0	0	0		0	0	0	0	0	0
417	2022-06-13	1809.5	1809.5	1809.5	1809.5	1809.5	1809.5	1809.5		0	0	0	0	0	0	0	0	0	0	0	0		0	0	0	0	0	0		0	0	0	0	0	0		0	0	0	0	0	0
418	2022-06-12	1828	1828.0	1828.0	1828.0	1828.0	1828.0	1828.0		0	0	0	0	0	0	0	0	0	0	0	0		0	0	0	0	0	0		0	0	0	0	0	0		0	0	0	0	0	0
419	2022-06-09	1871.5	1871.5	1871.5	1871.5	1871.5	1871.5	1871.5		0	0	0	0	0	0	0	0	0	0	0	0		0	0	0	0	0	0		0	0	0	0	0	0		0	0	0	0	0	0
420	2022-06-08	1848.8	1848.8	1848.8	1848.8	1848.8	1848.8	1848.8		0	0	0	0	0	0	0	0	0	0	0	0		0	0	0	0	0	0		0	0	0	0	0	0		0	0	0	0	0	0
421	2022-06-07	1851.9	1851.9	1851.9	1851.9	1851.9	1851.9	1851.9		0	0	0	0	0	0	0	0	0	0	0	0		0	0	0	0	0	0		0	0	0	0	0	0		0	0	0	0	0	0
422	2022-06-06	1847.5	1847.5	1847.5	1847.5	1847.5	1847.5	1847.5		0	0	0	0	0	0	0	0	0	0	0	0		0	0	0	0	0	0		0	0	0	0	0	0		0	0	0	0	0	0
423	2022-06-05	1839.2	1839.2	1839.2	1839.2	1839.2	1839.2	1839.2		0	0	0	0	0	0	0	0	0	0	0	0		0	0	0	0	0	0		0	0	0	0	0	0		0	0	0	0	0	0
424	2022-06-02	1845.4	1845.4	1845.4	1845.4	1845.4	1845.4	1845.4		0	0	0	0	0	0	0	0	0	0	0	0		0	0	0	0	0	0		0	0	0	0	0	0		0	0	0	0	0	0
425	2022-06-01	1866.5	1866.5	1866.5	1866.5	1866.5	1866.5	1866.5		0	0	0	0	0	0	0	0	0	0	0	0		0	0	0	0	0	0		0	0	0	0	0	0		0	0	0	0	0	0
426	2022-05-31	1843.3	1843.3	1843.3	1843.3	1843.3	1843.3	1843.3		0	0	0	0	0	0	0	0	0	0	0	0		0	0	0	0	0	0		0	0	0	0	0	0		0	0	0	0	0	0
427	2022-05-30	1842.7	1842.7	1842.7	1842.7	1842.7	1842.7	1842.7		0	0	0	0	0	0	0	0	0	0	0	0		0	0	0	0	0	0		0	0	0	0	0	0		0	0	0	0	0	0
428	2022-05-26	1851.3	1851.3	1851.3	1851.3	1851.3	1851.3	1851.3		0	0	0	0	0	0	0	0	0	0	0	0		0	0	0	0	0	0		0	0	0	0	0	0		0	0	0	0	0	0
429	2022-05-25	1847.4	1847.4	1847.4	1847.4	1847.4	1847.4	1847.4		0	0	0	0	0	0	0	0	0	0	0	0		0	0	0	0	0	0		0	0	0	0	0	0		0	0	0	0	0	0
430	2022-05-24	1846.2	1115.325	1833.250	1850.433	1845.932	1856.250	1197.461		-730.875	730.875	-12.95	12.95	4.233	4.233	-0.268	0.268	10.05	10.05	-648.739	648.739		534178	167.703	17.9183	0.071824	101.002	420862		0.395881	0.00701441	-0.00229282	0.000145163	-0.00544361	0.351392		0.395881	0.00701441	0.00229282	0.000145163	0.00544361	0.351392
431	2022-05-23	1865.1	1865.1	1865.1	1865.1	1865.1	1865.1	1865.1		0	0	0	0	0	0	0	0	0	0	0	0		0	0	0	0	0	0		0	0	0	0	0	0		0	0	0	0	0	0
432	2022-05-22	1847.8	1847.8	1847.8	1847.8	1847.8	1847.8	1847.8		0	0	0	0	0	0	0	0	0	0	0	0		0	0	0	0	0	0		0	0	0	0	0	0		0	0	0	0	0	0
433	2022-05-19	1841.8	1841.8	1841.8	1841.8	1841.8	1841.8	1841.8		0	0	0	0	0	0	0	0	0	0	0	0		0	0	0	0	0	0		0	0	0	0	0	0		0	0	0	0	0	0
434	2022-05-18	1841.2	1841.2	1841.2	1841.2	1841.2	1841.2	1841.2		0	0	0	0	0	0	0	0	0	0	0	0		0	0	0	0	0	0		0	0	0	0	0	0		0	0	0	0	0	0
435	2022-05-17	1815.9	1815.9	1815.9	1815.9	1815.9	1815.9	1815.9		0	0	0	0	0	0	0	0	0	0	0	0		0	0	0	0	0	0		0	0	0	0	0	0		0	0	0	0	0	0
436	2022-05-16	1818.2	1818.2	1818.2	1818.2	1818.2	1818.2	1818.2		0	0	0	0	0	0	0	0	0	0	0	0		0	0	0	0	0	0		0	0	0	0	0	0		0	0	0	0	0	0
437	2022-05-15	1813.5	1813.5	1813.5	1813.5	1813.5	1813.5	1813.5		0	0	0	0	0	0	0	0	0	0	0	0		0	0	0	0	0	0		0	0	0	0	0	0		0	0	0	0	0	0
438	2022-05-12	1807.4	1807.4	1807.4	1807.4	1807.4	1807.4	1807.4		0	0	0	0	0	0	0	0	0	0	0	0		0	0	0	0	0	0		0	0	0	0	0	0		0	0	0	0	0	0
439	2022-05-11	1823.8	1115.325	1839.829	1833.367	1840.880	1818.233	1197.004		-708.475	708.475	16.029	16.029	9.567	9.567	17.08	17.08	-5.567	5.567	-626.796	626.796		501937	256.929	91.5275	291.726	30.9915	392873		0.388461	-0.00878879	-0.00524564	-0.00936506	0.00305242	0.343676		0.388461	0.00878879	0.00524564	0.00936506	0.00305242	0.343676
440	2022-05-10	1852.6	1115.325	1852.993	1850.667	1848.830	1829.067	1197.364		-737.275	737.275	0.393	0.393	-1.933	1.933	-3.77	3.77	-23.533	23.533	-655.236	655.236		543574	0.154449	3.73649	14.2129	553.802	429334		0.397968	-0.000212134	0.0010434	0.00203498	0.0127027	0.353685		0.397968	0.000212134	0.0010434	0.00203498	0.0127027	0.353685
441	2022-05-09	1839.9	1839.9	1839.9	1839.9	1839.9	1839.9	1839.9		0	0	0	0	0	0	0	0	0	0	0	0		0	0	0	0	0	0		0	0	0	0	0	0		0	0	0	0	0	0
442	2022-05-08	1857.1	1115.325	1870.014	1856.733	1863.763	1846.720	1198.897		-741.775	741.775	12.914	12.914	-0.367	0.367	6.663	6.663	-10.38	10.38	-658.203	658.203		550230	166.771	0.134689	44.3956	107.744	433231		0.399427	-0.00695385	0.00019762	-0.00358785	0.00558936	0.354425		0.399427	0.00695385	0.00019762	0.00358785	0.00558936	0.354425
443	2022-05-05	1881.2	1115.325	1880.857	1887.867	1881.432	1867.180	1200.179		-765.875	765.875	-0.343	0.343	6.667	6.667	0.232	0.232	-14.02	14.02	-681.021	681.021		586565	0.117649	44.4489	0.053824	196.56	463790		0.40712	0.00018233	-0.00354401	-0.000123326	0.00745269	0.362014		0.40712	0.00018233	0.00354401	0.000123326	0.00745269	0.362014
444	2022-05-04	1874	1874.0	1874.0	1874.0	1874.0	1874.0	1874.0		0	0	0	0	0	0	0	0	0	0	0	0		0	0	0	0	0	0		0	0	0	0	0	0		0	0	0	0	0	0
445	2022-05-03	1867	1867.0	1867.0	1867.0	1867.0	1867.0	1867.0		0	0	0	0	0	0	0	0	0	0	0	0		0	0	0	0	0	0		0	0	0	0	0	0		0	0	0	0	0	0
446	2022-05-02	1868.8	1868.8	1868.8	1868.8	1868.8	1868.8	1868.8		0	0	0	0	0	0	0	0	0	0	0	0		0	0	0	0	0	0		0	0	0	0	0	0		0	0	0	0	0	0
447	2022-05-01	1861.8	1861.8	1861.8	1861.8	1861.8	1861.8	1861.8		0	0	0	0	0	0	0	0	0	0	0	0		0	0	0	0	0	0		0	0	0	0	0	0		0	0	0	0	0	0
448	2022-04-28	1909.3	1909.3	1909.3	1909.3	1909.3	1909.3	1909.3		0	0	0	0	0	0	0	0	0	0	0	0		0	0	0	0	0	0		0	0	0	0	0	0		0	0	0	0	0	0
449	2022-04-27	1888.7	1888.7	1888.7	1888.7	1888.7	1888.7	1888.7		0	0	0	0	0	0	0	0	0	0	0	0		0	0	0	0	0	0		0	0	0	0	0	0		0	0	0	0	0	0
450	2022-04-26	1885.9	1885.9	1885.9	1885.9	1885.9	1885.9	1885.9		0	0	0	0	0	0	0	0	0	0	0	0		0	0	0	0	0	0		0	0	0	0	0	0		0	0	0	0	0	0
451	2022-04-25	1901.4	1901.4	1901.4	1901.4	1901.4	1901.4	1901.4		0	0	0	0	0	0	0	0	0	0	0	0		0	0	0	0	0	0		0	0	0	0	0	0		0	0	0	0	0	0
452	2022-04-24	1893.2	1893.2	1893.2	1893.2	1893.2	1893.2	1893.2		0	0	0	0	0	0	0	0	0	0	0	0		0	0	0	0	0	0		0	0	0	0	0	0		0	0	0	0	0	0
453	2022-04-21	1931	1931.0	1931.0	1931.0	1931.0	1931.0	1931.0		0	0	0	0	0	0	0	0	0	0	0	0		0	0	0	0	0	0		0	0	0	0	0	0		0	0	0	0	0	0
454	2022-04-20	1944.9	1944.9	1944.9	1944.9	1944.9	1944.9	1944.9		0	0	0	0	0	0	0	0	0	0	0	0		0	0	0	0	0	0		0	0	0	0	0	0		0	0	0	0	0	0
455	2022-04-19	1952.3	1952.3	1952.3	1952.3	1952.3	1952.3	1952.3		0	0	0	0	0	0	0	0	0	0	0	0		0	0	0	0	0	0		0	0	0	0	0	0		0	0	0	0	0	0
456	2022-04-18	1955.7	1955.7	1955.7	1955.7	1955.7	1955.7	1955.7		0	0	0	0	0	0	0	0	0	0	0	0		0	0	0	0	0	0		0	0	0	0	0	0		0	0	0	0	0	0
457	2022-04-17	1982.9	1982.9	1982.9	1982.9	1982.9	1982.9	1982.9		0	0	0	0	0	0	0	0	0	0	0	0		0	0	0	0	0	0		0	0	0	0	0	0		0	0	0	0	0	0
458	2022-04-13	1970.9	1970.9	1970.9	1970.9	1970.9	1970.9	1970.9		0	0	0	0	0	0	0	0	0	0	0	0		0	0	0	0	0	0		0	0	0	0	0	0		0	0	0	0	0	0
459	2022-04-12	1981	1981.0	1981.0	1981.0	1981.0	1981.0	1981.0		0	0	0	0	0	0	0	0	0	0	0	0		0	0	0	0	0	0		0	0	0	0	0	0		0	0	0	0	0	0
460	2022-04-11	1972.1	1972.1	1972.1	1972.1	1972.1	1972.1	1972.1		0	0	0	0	0	0	0	0	0	0	0	0		0	0	0	0	0	0		0	0	0	0	0	0		0	0	0	0	0	0
461	2022-04-10	1944.3	1944.3	1944.3	1944.3	1944.3	1944.3	1944.3		0	0	0	0	0	0	0	0	0	0	0	0		0	0	0	0	0	0		0	0	0	0	0	0		0	0	0	0	0	0
462	2022-04-07	1941.6	1941.6	1941.6	1941.6	1941.6	1941.6	1941.6		0	0	0	0	0	0	0	0	0	0	0	0		0	0	0	0	0	0		0	0	0	0	0	0		0	0	0	0	0	0
463	2022-04-06	1933.8	1933.8	1933.8	1933.8	1933.8	1933.8	1933.8		0	0	0	0	0	0	0	0	0	0	0	0		0	0	0	0	0	0		0	0	0	0	0	0		0	0	0	0	0	0
464	2022-04-05	1918.4	1918.4	1918.4	1918.4	1918.4	1918.4	1918.4		0	0	0	0	0	0	0	0	0	0	0	0		0	0	0	0	0	0		0	0	0	0	0	0		0	0	0	0	0	0
465	2022-04-04	1922.9	1115.325	1930.700	1932.1	1938.032	1923.8	1203.387		-807.575	807.575	7.8	7.8	9.2	9.2	15.132	15.132	0.9	0.9	-719.513	719.513		652177	60.84	84.64	228.977	0.81	517699		0.419978	-0.00405637	-0.00478444	-0.00786936	-0.000468043	0.374181		0.419978	0.00405637	0.00478444	0.00786936	0.000468043	0.374181
466	2022-04-03	1929.2	1929.2	1929.2	1929.2	1929.2	1929.2	1929.2		0	0	0	0	0	0	0	0	0	0	0	0		0	0	0	0	0	0		0	0	0	0	0	0		0	0	0	0	0	0
467	2022-03-31	1919.1	1115.325	1930.700	1926.4	1929.387	1931.780	1203.402		-803.775	803.775	11.6	11.6	7.3	7.3	10.287	10.287	12.68	12.68	-715.698	715.698		646054	134.56	53.29	105.822	160.782	512224		0.418829	-0.0060445	-0.00380387	-0.00536033	-0.00660726	0.372934		0.418829	0.0060445	0.00380387	0.00536033	0.00660726	0.372934
468	2022-03-30	1949.2	1115.325	1922.028	1933.733	1935.442	1932.640	1203.602		-833.875	833.875	-27.172	27.172	-15.467	15.467	-13.758	13.758	-16.56	16.56	-745.598	745.598		695348	738.318	239.228	189.283	274.234	555916		0.427804	0.0139401	0.00793505	0.00705828	0.00849579	0.382515		0.427804	0.0139401	0.00793505	0.00705828	0.00849579	0.382515
469	2022-03-29	1933.5	1933.5	1933.5	1933.5	1933.5	1933.5	1933.5		0	0	0	0	0	0	0	0	0	0	0	0		0	0	0	0	0	0		0	0	0	0	0	0		0	0	0	0	0	0
470	2022-03-28	1912	1912.0	1912.0	1912.0	1912.0	1912.0	1912.0		0	0	0	0	0	0	0	0	0	0	0	0		0	0	0	0	0	0		0	0	0	0	0	0		0	0	0	0	0	0
471	2022-03-27	1939.6	1939.6	1939.6	1939.6	1939.6	1939.6	1939.6		0	0	0	0	0	0	0	0	0	0	0	0		0	0	0	0	0	0		0	0	0	0	0	0		0	0	0	0	0	0
472	2022-03-24	1953.8	1953.8	1953.8	1953.8	1953.8	1953.8	1953.8		0	0	0	0	0	0	0	0	0	0	0	0		0	0	0	0	0	0		0	0	0	0	0	0		0	0	0	0	0	0
473	2022-03-23	1961.6	1961.6	1961.6	1961.6	1961.6	1961.6	1961.6		0	0	0	0	0	0	0	0	0	0	0	0		0	0	0	0	0	0		0	0	0	0	0	0		0	0	0	0	0	0
474	2022-03-22	1936.6	1936.6	1936.6	1936.6	1936.6	1936.6	1936.6		0	0	0	0	0	0	0	0	0	0	0	0		0	0	0	0	0	0		0	0	0	0	0	0		0	0	0	0	0	0
475	2022-03-21	1920.7	1920.7	1920.7	1920.7	1920.7	1920.7	1920.7		0	0	0	0	0	0	0	0	0	0	0	0		0	0	0	0	0	0		0	0	0	0	0	0		0	0	0	0	0	0
476	2022-03-20	1928.6	1928.6	1928.6	1928.6	1928.6	1928.6	1928.6		0	0	0	0	0	0	0	0	0	0	0	0		0	0	0	0	0	0		0	0	0	0	0	0		0	0	0	0	0	0
477	2022-03-17	1928.2	1115.325	1933.328	1934.2	1931.344	1938.725	1203.601		-812.875	812.875	5.128	5.128	6	6	3.144	3.144	10.525	10.525	-724.599	724.599		660766	26.2964	36	9.88474	110.776	525044		0.421572	-0.00265948	-0.00311171	-0.00163054	-0.00545846	0.37579		0.421572	0.00265948	0.00311171	0.00163054	0.00545846	0.37579
478	2022-03-16	1942.1	1942.1	1942.1	1942.1	1942.1	1942.1	1942.1		0	0	0	0	0	0	0	0	0	0	0	0		0	0	0	0	0	0		0	0	0	0	0	0		0	0	0	0	0	0
479	2022-03-15	1908	1908.0	1908.0	1908.0	1908.0	1908.0	1908.0		0	0	0	0	0	0	0	0	0	0	0	0		0	0	0	0	0	0		0	0	0	0	0	0		0	0	0	0	0	0
480	2022-03-14	1928.5	1928.5	1928.5	1928.5	1928.5	1928.5	1928.5		0	0	0	0	0	0	0	0	0	0	0	0		0	0	0	0	0	0		0	0	0	0	0	0		0	0	0	0	0	0
481	2022-03-13	1959.6	1115.325	1971.660	1972.133	1970.458	1946.567	1204.996		-844.275	844.275	12.06	12.06	12.533	12.533	10.858	10.858	-13.033	13.033	-754.604	754.604		712800	145.444	157.076	117.896	169.859	569427		0.43084	-0.00615432	-0.00639569	-0.00554093	0.00665085	0.385081		0.43084	0.00615432	0.00639569	0.00554093	0.00665085	0.385081
482	2022-03-11	1982.7	1982.7	1982.7	1982.7	1982.7	1982.7	1982.7		0	0	0	0	0	0	0	0	0	0	0	0		0	0	0	0	0	0		0	0	0	0	0	0		0	0	0	0	0	0
483	2022-03-10	1998.1	1115.325	2001.629	1991.333	2004.975	1984.3	1205.366		-882.775	882.775	3.529	3.529	-6.767	6.767	6.875	6.875	-13.8	13.8	-792.734	792.734		779292	12.4538	45.7923	47.2656	190.44	628427		0.441807	-0.00176618	0.00338672	-0.00344077	0.00690656	0.396744		0.441807	0.00176618	0.00338672	0.00344077	0.00690656	0.396744
484	2022-03-09	1985.9	1985.9	1985.9	1985.9	1985.9	1985.9	1985.9		0	0	0	0	0	0	0	0	0	0	0	0		0	0	0	0	0	0		0	0	0	0	0	0		0	0	0	0	0	0
485	2022-03-08	2040.1	2040.1	2040.1	2040.1	2040.1	2040.1	2040.1		0	0	0	0	0	0	0	0	0	0	0	0		0	0	0	0	0	0		0	0	0	0	0	0		0	0	0	0	0	0
486	2022-03-07	1993.9	1115.325	1971.660	1980.467	1980.821	2021.350	1205.285		-878.575	878.575	-22.24	22.24	-13.433	13.433	-13.079	13.079	27.45	27.45	-788.615	788.615		771894	494.618	180.445	171.06	753.502	621914		0.440631	0.011154	0.00673705	0.00655951	-0.013767	0.395514		0.440631	0.011154	0.00673705	0.00655951	0.013767	0.395514
487	2022-03-04	1965.1	1965.1	1965.1	1965.1	1965.1	1965.1	1965.1		0	0	0	0	0	0	0	0	0	0	0	0		0	0	0	0	0	0		0	0	0	0	0	0		0	0	0	0	0	0
488	2022-03-03	1934.4	1115.325	1930.700	1934.567	1927.329	1943.0	1203.499		-819.075	819.075	-3.7	3.7	0.167	0.167	-7.071	7.071	8.6	8.6	-730.901	730.901		670884	13.69	0.027889	49.999	73.96	534216		0.423426	0.00191274	-8.63317e-05	0.0036554	-0.00444582	0.377844		0.423426	0.00191274	8.63317e-05	0.0036554	0.00444582	0.377844
489	2022-03-02	1920.9	1920.9	1920.9	1920.9	1920.9	1920.9	1920.9		0	0	0	0	0	0	0	0	0	0	0	0		0	0	0	0	0	0		0	0	0	0	0	0		0	0	0	0	0	0
490	2022-03-01	1942.4	1942.4	1942.4	1942.4	1942.4	1942.4	1942.4		0	0	0	0	0	0	0	0	0	0	0	0		0	0	0	0	0	0		0	0	0	0	0	0		0	0	0	0	0	0
491	2022-02-28	1899.4	1899.4	1899.4	1899.4	1899.4	1899.4	1899.4		0	0	0	0	0	0	0	0	0	0	0	0		0	0	0	0	0	0		0	0	0	0	0	0		0	0	0	0	0	0
492	2022-02-24	1886.5	1886.5	1886.5	1886.5	1886.5	1886.5	1886.5		0	0	0	0	0	0	0	0	0	0	0	0		0	0	0	0	0	0		0	0	0	0	0	0		0	0	0	0	0	0
493	2022-02-24	1925.1	1115.325	1938.823	1941.733	1947.035	1886.5	1203.363		-809.775	809.775	13.723	13.723	16.633	16.633	21.935	21.935	-38.6	38.6	-721.737	721.737		655736	188.321	276.657	481.144	1489.96	520904		0.42064	-0.00712846	-0.00864007	-0.0113942	0.0200509	0.374909		0.42064	0.00712846	0.00864007	0.0113942	0.0200509	0.374909
494	2022-02-23	1909.2	1909.2	1909.2	1909.2	1909.2	1909.2	1909.2		0	0	0	0	0	0	0	0	0	0	0	0		0	0	0	0	0	0		0	0	0	0	0	0		0	0	0	0	0	0
495	2022-02-22	1906.1	1906.1	1906.1	1906.1	1906.1	1906.1	1906.1		0	0	0	0	0	0	0	0	0	0	0	0		0	0	0	0	0	0		0	0	0	0	0	0		0	0	0	0	0	0
496	2022-02-18	1898.6	1115.325	1893.761	1892.833	1895.102	1901.780	1201.439		-783.275	783.275	-4.839	4.839	-5.767	5.767	-3.498	3.498	3.18	3.18	-697.161	697.161		613520	23.4159	33.2583	12.236	10.1124	486033		0.412554	0.00254872	0.0030375	0.00184241	-0.00167492	0.367197		0.412554	0.00254872	0.0030375	0.00184241	0.00167492	0.367197
497	2022-02-17	1900.7	1900.7	1900.7	1900.7	1900.7	1900.7	1900.7		0	0	0	0	0	0	0	0	0	0	0	0		0	0	0	0	0	0		0	0	0	0	0	0		0	0	0	0	0	0
498	2022-02-16	1870.2	1870.2	1870.2	1870.2	1870.2	1870.2	1870.2		0	0	0	0	0	0	0	0	0	0	0	0		0	0	0	0	0	0		0	0	0	0	0	0		0	0	0	0	0	0
499	2022-02-15	1854.8	1854.8	1854.8	1854.8	1854.8	1854.8	1854.8		0	0	0	0	0	0	0	0	0	0	0	0		0	0	0	0	0	0		0	0	0	0	0	0		0	0	0	0	0	0
500	2022-02-14	1868	1115.325	1870.014	1861.833	1865.635	1851.3	1198.870		-752.675	752.675	2.014	2.014	-6.167	6.167	-2.365	2.365	-16.7	16.7	-669.13	669.13		566520	4.0562	38.0319	5.59323	278.89	447735		0.402931	-0.00107816	0.00330139	0.00126606	0.00894004	0.358207		0.402931	0.00107816	0.00330139	0.00126606	0.00894004	0.358207
501	2022-02-11	1840.8	1840.8	1840.8	1840.8	1840.8	1840.8	1840.8		0	0	0	0	0	0	0	0	0	0	0	0		0	0	0	0	0	0		0	0	0	0	0	0		0	0	0	0	0	0
502	2022-02-10	1836.2	1115.325	1838.940	1832.267	1835.532	1838.0	1196.154		-720.875	720.875	2.74	2.74	-3.933	3.933	-0.668	0.668	1.8	1.8	-640.046	640.046		519661	7.5076	15.4685	0.446224	3.24	409659		0.392591	-0.00149221	0.00214192	0.000363795	-0.000980285	0.348571		0.392591	0.00149221	0.00214192	0.000363795	0.000980285	0.348571
503	2022-02-09	1835.2	1835.2	1835.2	1835.2	1835.2	1835.2	1835.2		0	0	0	0	0	0	0	0	0	0	0	0		0	0	0	0	0	0		0	0	0	0	0	0		0	0	0	0	0	0
504	2022-02-08	1826.6	1826.6	1826.6	1826.6	1826.6	1826.6	1826.6		0	0	0	0	0	0	0	0	0	0	0	0		0	0	0	0	0	0		0	0	0	0	0	0		0	0	0	0	0	0
505	2022-02-07	1820.6	1820.6	1820.6	1820.6	1820.6	1820.6	1820.6		0	0	0	0	0	0	0	0	0	0	0	0		0	0	0	0	0	0		0	0	0	0	0	0		0	0	0	0	0	0
506	2022-02-04	1806.6	1806.6	1806.6	1806.6	1806.6	1806.6	1806.6		0	0	0	0	0	0	0	0	0	0	0	0		0	0	0	0	0	0		0	0	0	0	0	0		0	0	0	0	0	0
507	2022-02-03	1803	1803.0	1803.0	1803.0	1803.0	1803.0	1803.0		0	0	0	0	0	0	0	0	0	0	0	0		0	0	0	0	0	0		0	0	0	0	0	0		0	0	0	0	0	0
508	2022-02-02	1809.2	1809.2	1809.2	1809.2	1809.2	1809.2	1809.2		0	0	0	0	0	0	0	0	0	0	0	0		0	0	0	0	0	0		0	0	0	0	0	0		0	0	0	0	0	0
509	2022-02-01	1800.3	1800.3	1800.3	1800.3	1800.3	1800.3	1800.3		0	0	0	0	0	0	0	0	0	0	0	0		0	0	0	0	0	0		0	0	0	0	0	0		0	0	0	0	0	0
510	2022-01-31	1795	1795.0	1795.0	1795.0	1795.0	1795.0	1795.0		0	0	0	0	0	0	0	0	0	0	0	0		0	0	0	0	0	0		0	0	0	0	0	0		0	0	0	0	0	0
511	2022-01-28	1784.9	1784.9	1784.9	1784.9	1784.9	1784.9	1784.9		0	0	0	0	0	0	0	0	0	0	0	0		0	0	0	0	0	0		0	0	0	0	0	0		0	0	0	0	0	0
512	2022-01-27	1793.3	1115.325	1789.867	1796.767	1790.399	1807.4	1192.159		-677.975	677.975	-3.433	3.433	3.467	3.467	-2.901	2.901	14.1	14.1	-601.141	601.141		459650	11.7855	12.0201	8.4158	198.81	361371		0.37806	0.00191435	-0.00193331	0.00161769	-0.0078626	0.335215		0.37806	0.00191435	0.00193331	0.00161769	0.0078626	0.335215
513	2022-01-26	1829.9	1829.9	1829.9	1829.9	1829.9	1829.9	1829.9		0	0	0	0	0	0	0	0	0	0	0	0		0	0	0	0	0	0		0	0	0	0	0	0		0	0	0	0	0	0
514	2022-01-25	1852.7	1852.7	1852.7	1852.7	1852.7	1852.7	1852.7		0	0	0	0	0	0	0	0	0	0	0	0		0	0	0	0	0	0		0	0	0	0	0	0		0	0	0	0	0	0
515	2022-01-24	1841.7	1115.325	1838.940	1839.733	1839.673	1847.475	1196.834		-726.375	726.375	-2.76	2.76	-1.967	1.967	-2.027	2.027	5.775	5.775	-644.866	644.866		527621	7.6176	3.86909	4.10873	33.3506	415852		0.394405	0.00149862	0.00106803	0.00110061	-0.00313569	0.350147		0.394405	0.00149862	0.00106803	0.00110061	0.00313569	0.350147
516	2022-01-21	1831.8	1831.8	1831.8	1831.8	1831.8	1831.8	1831.8		0	0	0	0	0	0	0	0	0	0	0	0		0	0	0	0	0	0		0	0	0	0	0	0		0	0	0	0	0	0
517	2022-01-20	1842.5	1115.325	1833.250	1843.033	1838.254	1837.450	1196.955		-727.175	727.175	-9.25	9.25	0.533	0.533	-4.246	4.246	-5.05	5.05	-645.545	645.545		528783	85.5625	0.284089	18.0285	25.5025	416728		0.394668	0.00502035	-0.000289281	0.00230448	0.00274084	0.350364		0.394668	0.00502035	0.000289281	0.00230448	0.00274084	0.350364
518	2022-01-19	1843.1	1843.1	1843.1	1843.1	1843.1	1843.1	1843.1		0	0	0	0	0	0	0	0	0	0	0	0		0	0	0	0	0	0		0	0	0	0	0	0		0	0	0	0	0	0
519	2022-01-18	1812.3	1812.3	1812.3	1812.3	1812.3	1812.3	1812.3		0	0	0	0	0	0	0	0	0	0	0	0		0	0	0	0	0	0		0	0	0	0	0	0		0	0	0	0	0	0
520	2022-01-14	1816.5	1816.5	1816.5	1816.5	1816.5	1816.5	1816.5		0	0	0	0	0	0	0	0	0	0	0	0		0	0	0	0	0	0		0	0	0	0	0	0		0	0	0	0	0	0
521	2022-01-13	1821.2	1821.2	1821.2	1821.2	1821.2	1821.2	1821.2		0	0	0	0	0	0	0	0	0	0	0	0		0	0	0	0	0	0		0	0	0	0	0	0		0	0	0	0	0	0
522	2022-01-12	1827.2	1827.2	1827.2	1827.2	1827.2	1827.2	1827.2		0	0	0	0	0	0	0	0	0	0	0	0		0	0	0	0	0	0		0	0	0	0	0	0		0	0	0	0	0	0
523	2022-01-11	1818.6	1818.6	1818.6	1818.6	1818.6	1818.6	1818.6		0	0	0	0	0	0	0	0	0	0	0	0		0	0	0	0	0	0		0	0	0	0	0	0		0	0	0	0	0	0
524	2022-01-10	1798.4	1798.4	1798.4	1798.4	1798.4	1798.4	1798.4		0	0	0	0	0	0	0	0	0	0	0	0		0	0	0	0	0	0		0	0	0	0	0	0		0	0	0	0	0	0
525	2022-01-07	1797	1797.0	1797.0	1797.0	1797.0	1797.0	1797.0		0	0	0	0	0	0	0	0	0	0	0	0		0	0	0	0	0	0		0	0	0	0	0	0		0	0	0	0	0	0
526	2022-01-06	1788.7	1788.7	1788.7	1788.7	1788.7	1788.7	1788.7		0	0	0	0	0	0	0	0	0	0	0	0		0	0	0	0	0	0		0	0	0	0	0	0		0	0	0	0	0	0
527	2022-01-05	1824.6	1824.6	1824.6	1824.6	1824.6	1824.6	1824.6		0	0	0	0	0	0	0	0	0	0	0	0		0	0	0	0	0	0		0	0	0	0	0	0		0	0	0	0	0	0
528	2022-01-04	1814	1814.0	1814.0	1814.0	1814.0	1814.0	1814.0		0	0	0	0	0	0	0	0	0	0	0	0		0	0	0	0	0	0		0	0	0	0	0	0		0	0	0	0	0	0
529	2022-01-03	1799.4	1799.4	1799.4	1799.4	1799.4	1799.4	1799.4		0	0	0	0	0	0	0	0	0	0	0	0		0	0	0	0	0	0		0	0	0	0	0	0		0	0	0	0	0	0
530	2021-12-31	1827.5	1827.5	1827.5	1827.5	1827.5	1827.5	1827.5		0	0	0	0	0	0	0	0	0	0	0	0		0	0	0	0	0	0		0	0	0	0	0	0		0	0	0	0	0	0
531	2021-12-30	1812.7	1812.7	1812.7	1812.7	1812.7	1812.7	1812.7		0	0	0	0	0	0	0	0	0	0	0	0		0	0	0	0	0	0		0	0	0	0	0	0		0	0	0	0	0	0
532	2021-12-29	1805.1	1805.1	1805.1	1805.1	1805.1	1805.1	1805.1		0	0	0	0	0	0	0	0	0	0	0	0		0	0	0	0	0	0		0	0	0	0	0	0		0	0	0	0	0	0
533	2021-12-28	1810.2	1810.2	1810.2	1810.2	1810.2	1810.2	1810.2		0	0	0	0	0	0	0	0	0	0	0	0		0	0	0	0	0	0		0	0	0	0	0	0		0	0	0	0	0	0
534	2021-12-27	1808.1	1808.1	1808.1	1808.1	1808.1	1808.1	1808.1		0	0	0	0	0	0	0	0	0	0	0	0		0	0	0	0	0	0		0	0	0	0	0	0		0	0	0	0	0	0
535	2021-12-23	1811.2	1811.2	1811.2	1811.2	1811.2	1811.2	1811.2		0	0	0	0	0	0	0	0	0	0	0	0		0	0	0	0	0	0		0	0	0	0	0	0		0	0	0	0	0	0
536	2021-12-22	1801.6	1801.6	1801.6	1801.6	1801.6	1801.6	1801.6		0	0	0	0	0	0	0	0	0	0	0	0		0	0	0	0	0	0		0	0	0	0	0	0		0	0	0	0	0	0
537	2021-12-21	1787.9	1787.9	1787.9	1787.9	1787.9	1787.9	1787.9		0	0	0	0	0	0	0	0	0	0	0	0		0	0	0	0	0	0		0	0	0	0	0	0		0	0	0	0	0	0
538	2021-12-20	1793.7	1793.7	1793.7	1793.7	1793.7	1793.7	1793.7		0	0	0	0	0	0	0	0	0	0	0	0		0	0	0	0	0	0		0	0	0	0	0	0		0	0	0	0	0	0
539	2021-12-17	1803.8	1803.8	1803.8	1803.8	1803.8	1803.8	1803.8		0	0	0	0	0	0	0	0	0	0	0	0		0	0	0	0	0	0		0	0	0	0	0	0		0	0	0	0	0	0
540	2021-12-16	1796.6	1796.6	1796.6	1796.6	1796.6	1796.6	1796.6		0	0	0	0	0	0	0	0	0	0	0	0		0	0	0	0	0	0		0	0	0	0	0	0		0	0	0	0	0	0
541	2021-12-15	1762.6	1115.325	1767.057	1770.9	1767.862	1783.5	1189.139		-647.275	647.275	4.457	4.457	8.3	8.3	5.262	5.262	20.9	20.9	-573.461	573.461		418965	19.8648	68.89	27.6886	436.81	328858		0.367227	-0.00252865	-0.00470895	-0.00298536	-0.0118575	0.325349		0.367227	0.00252865	0.00470895	0.00298536	0.0118575	0.325349
542	2021-12-14	1770.4	1770.4	1770.4	1770.4	1770.4	1770.4	1770.4		0	0	0	0	0	0	0	0	0	0	0	0		0	0	0	0	0	0		0	0	0	0	0	0		0	0	0	0	0	0
543	2021-12-13	1786.3	1786.3	1786.3	1786.3	1786.3	1786.3	1786.3		0	0	0	0	0	0	0	0	0	0	0	0		0	0	0	0	0	0		0	0	0	0	0	0		0	0	0	0	0	0
544	2021-12-10	1782.9	1782.9	1782.9	1782.9	1782.9	1782.9	1782.9		0	0	0	0	0	0	0	0	0	0	0	0		0	0	0	0	0	0		0	0	0	0	0	0		0	0	0	0	0	0
545	2021-12-09	1774.6	1115.325	1775.755	1778.133	1776.659	1782.8	1190.635		-659.275	659.275	1.155	1.155	3.533	3.533	2.059	2.059	8.2	8.2	-583.965	583.965		434644	1.33403	12.4821	4.23948	67.24	341015		0.371506	-0.000650851	-0.00199087	-0.00116026	-0.00462076	0.329069		0.371506	0.000650851	0.00199087	0.00116026	0.00462076	0.329069
546	2021-12-08	1783.4	1115.325	1784.533	1784.133	1781.689	1782.7	1191.387		-668.075	668.075	1.133	1.133	0.733	0.733	-1.711	1.711	-0.7	0.7	-592.013	592.013		446324	1.28369	0.537289	2.92752	0.49	350479		0.374607	-0.000635303	-0.000411013	0.000959403	0.000392509	0.331957		0.374607	0.000635303	0.000411013	0.000959403	0.000392509	0.331957
547	2021-12-07	1782.6	1782.6	1782.6	1782.6	1782.6	1782.6	1782.6		0	0	0	0	0	0	0	0	0	0	0	0		0	0	0	0	0	0		0	0	0	0	0	0		0	0	0	0	0	0
548	2021-12-06	1777.5	1777.5	1777.5	1777.5	1777.5	1777.5	1777.5		0	0	0	0	0	0	0	0	0	0	0	0		0	0	0	0	0	0		0	0	0	0	0	0		0	0	0	0	0	0
549	2021-12-03	1782	1782.0	1782.0	1782.0	1782.0	1782.0	1782.0		0	0	0	0	0	0	0	0	0	0	0	0		0	0	0	0	0	0		0	0	0	0	0	0		0	0	0	0	0	0
550	2021-12-02	1760.7	1760.7	1760.7	1760.7	1760.7	1760.7	1760.7		0	0	0	0	0	0	0	0	0	0	0	0		0	0	0	0	0	0		0	0	0	0	0	0		0	0	0	0	0	0
551	2021-12-01	1781.6	1781.6	1781.6	1781.6	1781.6	1781.6	1781.6		0	0	0	0	0	0	0	0	0	0	0	0		0	0	0	0	0	0		0	0	0	0	0	0		0	0	0	0	0	0
552	2021-11-30	1773.6	1773.6	1773.6	1773.6	1773.6	1773.6	1773.6		0	0	0	0	0	0	0	0	0	0	0	0		0	0	0	0	0	0		0	0	0	0	0	0		0	0	0	0	0	0
553	2021-11-29	1782.3	1115.325	1784.533	1787.067	1787.840	1776.525	1191.791		-666.975	666.975	2.233	2.233	4.767	4.767	5.54	5.54	-5.775	5.775	-590.509	590.509		444856	4.98629	22.7243	30.6916	33.3506	348701		0.374222	-0.00125288	-0.00267463	-0.00310834	0.0032402	0.331319		0.374222	0.00125288	0.00267463	0.00310834	0.0032402	0.331319
554	2021-11-26	1785.3	1785.3	1785.3	1785.3	1785.3	1785.3	1785.3		0	0	0	0	0	0	0	0	0	0	0	0		0	0	0	0	0	0		0	0	0	0	0	0		0	0	0	0	0	0
555	2021-11-24	1784.1	1784.1	1784.1	1784.1	1784.1	1784.1	1784.1		0	0	0	0	0	0	0	0	0	0	0	0		0	0	0	0	0	0		0	0	0	0	0	0		0	0	0	0	0	0
556	2021-11-23	1783.5	1783.5	1783.5	1783.5	1783.5	1783.5	1783.5		0	0	0	0	0	0	0	0	0	0	0	0		0	0	0	0	0	0		0	0	0	0	0	0		0	0	0	0	0	0
557	2021-11-22	1806	1806.0	1806.0	1806.0	1806.0	1806.0	1806.0		0	0	0	0	0	0	0	0	0	0	0	0		0	0	0	0	0	0		0	0	0	0	0	0		0	0	0	0	0	0
558	2021-11-19	1851.2	1851.2	1851.2	1851.2	1851.2	1851.2	1851.2		0	0	0	0	0	0	0	0	0	0	0	0		0	0	0	0	0	0		0	0	0	0	0	0		0	0	0	0	0	0
559	2021-11-18	1861	1861.0	1861.0	1861.0	1861.0	1861.0	1861.0		0	0	0	0	0	0	0	0	0	0	0	0		0	0	0	0	0	0		0	0	0	0	0	0		0	0	0	0	0	0
560	2021-11-17	1869.7	1869.7	1869.7	1869.7	1869.7	1869.7	1869.7		0	0	0	0	0	0	0	0	0	0	0	0		0	0	0	0	0	0		0	0	0	0	0	0		0	0	0	0	0	0
561	2021-11-16	1853.6	1853.6	1853.6	1853.6	1853.6	1853.6	1853.6		0	0	0	0	0	0	0	0	0	0	0	0		0	0	0	0	0	0		0	0	0	0	0	0		0	0	0	0	0	0
562	2021-11-15	1866.1	1866.1	1866.1	1866.1	1866.1	1866.1	1866.1		0	0	0	0	0	0	0	0	0	0	0	0		0	0	0	0	0	0		0	0	0	0	0	0		0	0	0	0	0	0
563	2021-11-12	1867.9	1867.9	1867.9	1867.9	1867.9	1867.9	1867.9		0	0	0	0	0	0	0	0	0	0	0	0		0	0	0	0	0	0		0	0	0	0	0	0		0	0	0	0	0	0
564	2021-11-11	1863.2	1863.2	1863.2	1863.2	1863.2	1863.2	1863.2		0	0	0	0	0	0	0	0	0	0	0	0		0	0	0	0	0	0		0	0	0	0	0	0		0	0	0	0	0	0
565	2021-11-10	1847.6	1847.6	1847.6	1847.6	1847.6	1847.6	1847.6		0	0	0	0	0	0	0	0	0	0	0	0		0	0	0	0	0	0		0	0	0	0	0	0		0	0	0	0	0	0
566	2021-11-09	1830.2	1830.2	1830.2	1830.2	1830.2	1830.2	1830.2		0	0	0	0	0	0	0	0	0	0	0	0		0	0	0	0	0	0		0	0	0	0	0	0		0	0	0	0	0	0
567	2021-11-08	1827.4	1827.4	1827.4	1827.4	1827.4	1827.4	1827.4		0	0	0	0	0	0	0	0	0	0	0	0		0	0	0	0	0	0		0	0	0	0	0	0		0	0	0	0	0	0
568	2021-11-04	1816.4	1816.4	1816.4	1816.4	1816.4	1816.4	1816.4		0	0	0	0	0	0	0	0	0	0	0	0		0	0	0	0	0	0		0	0	0	0	0	0		0	0	0	0	0	0
569	2021-11-03	1793	1793.0	1793.0	1793.0	1793.0	1793.0	1793.0		0	0	0	0	0	0	0	0	0	0	0	0		0	0	0	0	0	0		0	0	0	0	0	0		0	0	0	0	0	0
570	2021-11-02	1763.6	1763.6	1763.6	1763.6	1763.6	1763.6	1763.6		0	0	0	0	0	0	0	0	0	0	0	0		0	0	0	0	0	0		0	0	0	0	0	0		0	0	0	0	0	0
571	2021-11-01	1788.7	1788.7	1788.7	1788.7	1788.7	1788.7	1788.7		0	0	0	0	0	0	0	0	0	0	0	0		0	0	0	0	0	0		0	0	0	0	0	0		0	0	0	0	0	0
572	2021-10-31	1795.1	1115.325	1789.867	1791.567	1789.857	1786.8	1191.776		-679.775	679.775	-5.233	5.233	-3.533	3.533	-5.243	5.243	-8.3	8.3	-603.324	603.324		462094	27.3843	12.4821	27.489	68.89	364000		0.378684	0.00291516	0.00196814	0.00292073	0.0046237	0.336095		0.378684	0.00291516	0.00196814	0.00292073	0.0046237	0.336095
573	2021-10-29	1783	1783.0	1783.0	1783.0	1783.0	1783.0	1783.0		0	0	0	0	0	0	0	0	0	0	0	0		0	0	0	0	0	0		0	0	0	0	0	0		0	0	0	0	0	0
574	2021-10-27	1801.6	1801.6	1801.6	1801.6	1801.6	1801.6	1801.6		0	0	0	0	0	0	0	0	0	0	0	0		0	0	0	0	0	0		0	0	0	0	0	0		0	0	0	0	0	0
575	2021-10-26	1797.9	1797.9	1797.9	1797.9	1797.9	1797.9	1797.9		0	0	0	0	0	0	0	0	0	0	0	0		0	0	0	0	0	0		0	0	0	0	0	0		0	0	0	0	0	0
576	2021-10-25	1792.7	1792.7	1792.7	1792.7	1792.7	1792.7	1792.7		0	0	0	0	0	0	0	0	0	0	0	0		0	0	0	0	0	0		0	0	0	0	0	0		0	0	0	0	0	0
577	2021-10-24	1806	1806.0	1806.0	1806.0	1806.0	1806.0	1806.0		0	0	0	0	0	0	0	0	0	0	0	0		0	0	0	0	0	0		0	0	0	0	0	0		0	0	0	0	0	0
578	2021-10-21	1795.5	1795.5	1795.5	1795.5	1795.5	1795.5	1795.5		0	0	0	0	0	0	0	0	0	0	0	0		0	0	0	0	0	0		0	0	0	0	0	0		0	0	0	0	0	0
579	2021-10-20	1781.2	1115.325	1787.691	1784.333	1787.004	1789.8	1191.008		-665.875	665.875	6.491	6.491	3.133	3.133	5.804	5.804	8.6	8.6	-590.192	590.192		443390	42.1331	9.81569	33.6864	73.96	348327		0.373835	-0.00364417	-0.00175893	-0.00325848	-0.00482821	0.331345		0.373835	0.00364417	0.00175893	0.00325848	0.00482821	0.331345
580	2021-10-19	1784.1	1784.1	1784.1	1784.1	1784.1	1784.1	1784.1		0	0	0	0	0	0	0	0	0	0	0	0		0	0	0	0	0	0		0	0	0	0	0	0		0	0	0	0	0	0
581	2021-10-18	1769.7	1115.325	1779.675	1773.733	1776.604	1780.720	1190.306		-654.375	654.375	9.975	9.975	4.033	4.033	6.904	6.904	11.02	11.02	-579.394	579.394		428207	99.5006	16.2651	47.6652	121.44	335697		0.369766	-0.00563655	-0.00227892	-0.00390123	-0.00622704	0.327397		0.369766	0.00563655	0.00227892	0.00390123	0.00622704	0.327397
582	2021-10-17	1764.8	1115.325	1771.120	1771.133	1763.235	1777.340	1188.799		-649.475	649.475	6.32	6.32	6.333	6.333	-1.565	1.565	12.54	12.54	-576.001	576.001		421818	39.9424	40.1069	2.44923	157.252	331777		0.368016	-0.00358114	-0.00358851	0.000886786	-0.00710562	0.326383		0.368016	0.00358114	0.00358851	0.000886786	0.00710562	0.326383
583	2021-10-14	1767.2	1767.2	1767.2	1767.2	1767.2	1767.2	1767.2		0	0	0	0	0	0	0	0	0	0	0	0		0	0	0	0	0	0		0	0	0	0	0	0		0	0	0	0	0	0
584	2021-10-13	1796.7	1115.325	1797.700	1797.4	1796.633	1780.450	1192.318		-681.375	681.375	1	1	0.7	0.7	-0.067	0.067	-16.25	16.25	-604.382	604.382		464272	1	0.49	0.004489	264.062	365278		0.379237	-0.000556576	-0.000389603	3.72906e-05	0.00904436	0.336384		0.379237	0.000556576	0.000389603	3.72906e-05	0.00904436	0.336384
585	2021-10-12	1793.7	1793.7	1793.7	1793.7	1793.7	1793.7	1793.7		0	0	0	0	0	0	0	0	0	0	0	0		0	0	0	0	0	0		0	0	0	0	0	0		0	0	0	0	0	0
586	2021-10-11	1758.3	1758.3	1758.3	1758.3	1758.3	1758.3	1758.3		0	0	0	0	0	0	0	0	0	0	0	0		0	0	0	0	0	0		0	0	0	0	0	0		0	0	0	0	0	0
587	2021-10-10	1754.6	1115.325	1759.637	1754.833	1757.418	1757.8	1187.821		-639.275	639.275	5.037	5.037	0.233	0.233	2.818	2.818	3.2	3.2	-566.779	566.779		408673	25.3714	0.054289	7.94112	10.24	321238		0.364342	-0.00287074	-0.000132794	-0.00160606	-0.00182378	0.323025		0.364342	0.00287074	0.000132794	0.00160606	0.00182378	0.323025
588	2021-10-07	1756.3	1756.3	1756.3	1756.3	1756.3	1756.3	1756.3		0	0	0	0	0	0	0	0	0	0	0	0		0	0	0	0	0	0		0	0	0	0	0	0		0	0	0	0	0	0
589	2021-10-06	1757.9	1757.9	1757.9	1757.9	1757.9	1757.9	1757.9		0	0	0	0	0	0	0	0	0	0	0	0		0	0	0	0	0	0		0	0	0	0	0	0		0	0	0	0	0	0
590	2021-10-05	1760.5	1760.5	1760.5	1760.5	1760.5	1760.5	1760.5		0	0	0	0	0	0	0	0	0	0	0	0		0	0	0	0	0	0		0	0	0	0	0	0		0	0	0	0	0	0
[truncated: 5,293 more rows]

## Sheet: 30%
Num	Date	Original	Mean	Hot&Deck	KNN	Random Forest	Spline	SVM		diff1-mean	abs diff2-mean	diff1-hot	abs diff2-hot	diff1-knn	abs diff2-knn	diff1-random	abs diff2-random	diff1-spline	abs diff2-spline	diff1-svm	abs diff2-svm		diff3-mean	diff3-hot	diff3-knn	diff3-random	diff3-spline	diff3-svm		diff4-mean	diff4-hot	diff4-knn	diff4-random	diff4-spline	diff4-svm		diff5-mean	diff5-hot	diff5-knn	diff5-random	diff5-spline	diff5-svm
[truncated: 5,883 more rows]

[truncated: 4 more sheets: 40%, 50%, ACC, All Results]
